# Supplementary material for: Palladium-catalyzed asymmetric hydrogenation of lactones under base-free conditions
Source: Royal Society of Chemistry journal article supplement (doi:10.1039/d4sc01890g), 2024-01-01
Supplement: d4sc01890g1.pdf [file d4sc01890g1.pdf]

## Supporting Information

### Palladium-catalyzed Asymmetric Hydrogenation of Lactones under Base-Free Condition

*Han Wang, Shan-Shan Xun, Chang-Bin Yu,\* and Yong-Gui Zhou\**

*School of Chemistry, Dalian University of Technology, 2 Linggong Road, Dalian  
116024, P. R. China; State Key Laboratory of Catalysis, Dalian Institute of Chemical  
Physics, Chinese Academy of Sciences, Dalian 116023, P. R. China*

*Email: cbyu@dicp.ac.cn; ygzhou@dicp.ac.cn*

#### Table of Contents

|                                                                  |                |
|------------------------------------------------------------------|----------------|
| <b>1. General and Materials.....</b>                             | <b>S1</b>      |
| <b>2. Synthesis of Substrate Lactones.....</b>                   | <b>S1-9</b>    |
| <b>3. Condition Optimization for Kinetic Resolution.....</b>     | <b>S10</b>     |
| <b>4. Pd-catalyzed Hydrogenative DKR and KR of Lactones.....</b> | <b>S11-22</b>  |
| <b>5. Experiment at Gram Scale.....</b>                          | <b>S23</b>     |
| <b>6. Product Elaboration.....</b>                               | <b>S24-26</b>  |
| <b>7. Determination of Absolute Configuration.....</b>           | <b>S27-30</b>  |
| <b>8. Proposed Mechanism of DKR.....</b>                         | <b>S31</b>     |
| <b>9. References.....</b>                                        | <b>S32</b>     |
| <b>10. Copy of NMR and HPLC Spectra.....</b>                     | <b>S33-211</b> |

## 1. General and Materials

**General:** All reactions were carried out under an atmosphere of nitrogen using the standard Schlenk techniques, unless otherwise noted.  $^1\text{H}$  NMR,  $^{13}\text{C}$  NMR and  $^{19}\text{F}$  NMR spectra were recorded at room temperature in  $\text{CDCl}_3$  on 400 MHz instrument with TMS as internal standard. Enantiomeric excess was determined by HPLC analysis, using the chiral column described below in detail. Optical rotations were measured by polarimeter. Flash column chromatography was performed on silica gel (200-300 mesh). The heat source for all heating reactions is the oil bath. High-resolution mass spectrometry (HRMS) was measured on an electrospray ionization (ESI) apparatus using the time-of-flight (TOF) mass spectrometry. All reactions were monitored by TLC analysis.

**Materials:** Commercially available reagents and anhydrous solvents were used throughout without the further purification.

## 2. Synthesis of Substrate Lactones

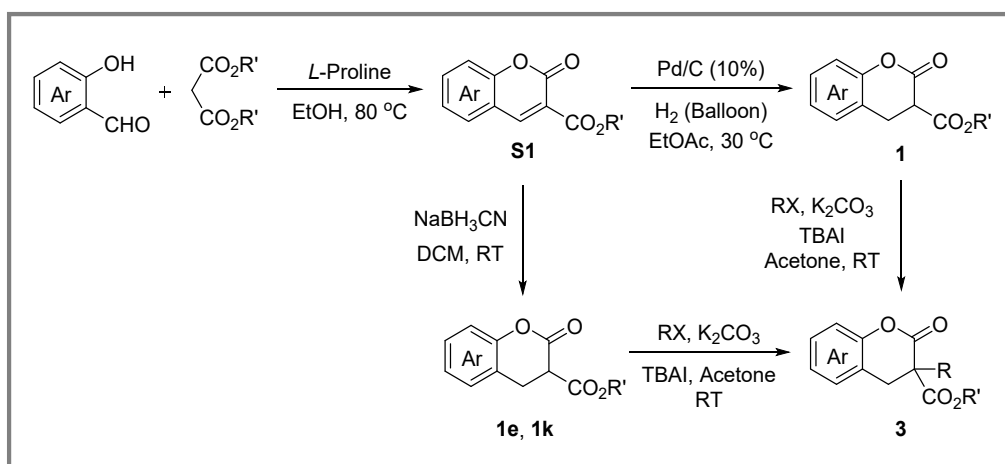

The substrate lactones **1** were prepared from the readily available 2-hydroxyarylaldehydes and malonates over two steps according to the known methods.<sup>[1,2]</sup> The first step is the synthesis of the intermediate coumarin-3-carboxylates **S1**, which are the known compounds; the second step is Pd/C-catalyzed hydrogenation to afford the substrate lactones. For **1e** and **1k** which is sensitive to Pd/C-catalyzed hydrogenation system, sodium cyanoborohydride was used for reduction. Among them, lactones **1a**, **1b**, **1h**, **1j**, **1m** and **1o** were the known compounds.<sup>[1,3]</sup>

The substrate lactones **3** with quaternary stereocenter were prepared through the alkylation of above lactones. Among them, lactones **3ae** and **3af** were the known compounds.<sup>[4]</sup>

### 2.1. The Synthesis of Alkoxy carbonyl Substituted Lactones

#### General Procedure for the Synthesis of Intermediate Coumarin-3-carboxylates **S1**:

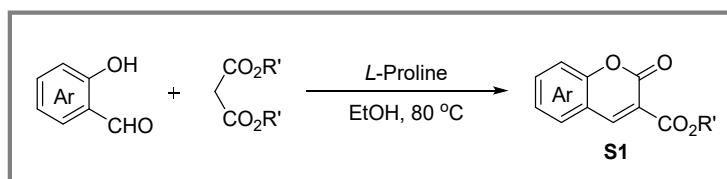

To a mixture of 2-hydroxyarylaldehyde (7.0 mmol), malonate (8.4 mmol) and ethanol (5 mL), L-proline (0.350 g, 3 mmol) was added and heated to 80 °C overnight. After the completion of the

reaction (monitored by TLC), the mixture was cooled to room temperature and poured in water (50 mL). After stirred for 10 min, the mixture was filtered and the residue was washed with cool ethanol to give a crude product **S1** for next step without the further purification.

**General Procedure for the Synthesis of Lactones **1** with Pd/C:**

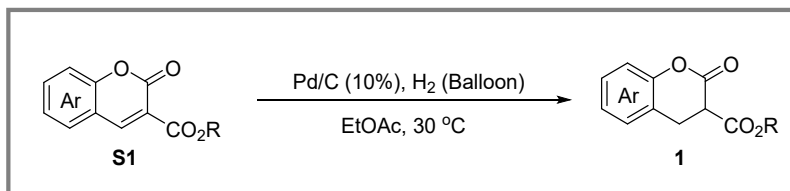

To a solution of the above coumarin-3-carboxylates **S1** (7.0 mmol) in ethyl acetate (5 mL), 10% palladium on activated charcoal (20% wt of **S1**) was added, then the mixture was charged hydrogen gas (balloon). After the reaction completion (monitored by TLC), the solid was filtered off and the volatiles were removed under the reduced pressure. Then, the residue was purified by silica gel column using hexanes/ethyl acetate (5:1) as eluent to afford the desired alkoxy carbonyl lactones **1**.

***Iso*-Propyl 2-oxochromane-3-carboxylate (**1c**):**

Reaction conduct under 20 mmol scale. 2.098 g, 45% yield over two steps, white solid, mp 61-62 °C, known compound,  $R_f = 0.60$  (hexanes/ethyl acetate 5/1).  $^1\text{H NMR}$  (400 MHz,  $\text{CDCl}_3$ )  $\delta$  7.28-7.24 (m, 1H), 7.22-7.14 (m, 1H), 7.14-7.01 (m, 2H), 5.10-4.90 (m, 1H), 3.79-3.65 (m, 1H), 3.42-3.33 (m, 1H), 3.21-3.12 (m, 1H), 1.19 (d,  $J = 6.3$  Hz, 3H), 1.11 (d,  $J = 6.3$  Hz, 3H).  $^{13}\text{C NMR}$  (100 MHz,  $\text{CDCl}_3$ )  $\delta$  167.1, 165.0, 151.5, 128.7, 128.3, 124.8, 120.8, 116.8, 70.0, 46.6, 27.4, 21.5, 21.4. The HRMS Calculated for  $\text{C}_{13}\text{H}_{15}\text{O}_4$   $[\text{M}+\text{H}]^+$  235.0965, found: 235.0969.

***tert*-Butyl 2-oxochromane-3-carboxylate (**1d**):**

Reaction conduct under 20 mmol scale. 1.809 g, 36% yield over two steps, white solid, mp 45-46 °C, new compound,  $R_f = 0.70$  (hexanes/ethyl acetate 5/1).  $^1\text{H NMR}$  (400 MHz,  $\text{CDCl}_3$ )  $\delta$  7.23 (m, 1H), 7.21 (d,  $J = 7.3$  Hz, 1H), 7.13-7.04 (m, 2H), 3.68 (dd,  $J = 6.8, 6.0$  Hz, 1H), 3.33 (dd,  $J = 15.9, 7.0$  Hz, 1H), 3.17 (dd,  $J = 15.9, 5.8$  Hz, 1H), 1.34 (s, 9H).  $^{13}\text{C NMR}$  (100 MHz,  $\text{CDCl}_3$ )  $\delta$  166.6, 165.3, 151.6, 128.6, 128.3, 124.7, 121.0, 116.7, 83.2, 47.3, 27.68, 27.65. HRMS Calculated for  $\text{C}_{14}\text{H}_{17}\text{O}_4$   $[\text{M}+\text{H}]^+$  249.1121, found: 249.1120.

**Ethyl 8-methyl-2-oxochromane-3-carboxylate (**1f**):**

0.745 g, 45% yield over two steps, white solid, mp 65-66 °C, new compound,  $R_f = 0.70$  (hexanes/ethyl acetate 5/1).  $^1\text{H NMR}$  (400 MHz,  $\text{CDCl}_3$ )  $\delta$  7.17-7.07 (m, 1H), 7.07-6.65 (m, 2H), 4.31-4.09 (m, 2H), 3.79-3.63 (m, 1H), 3.44-3.31 (m, 1H), 3.21-3.05 (m, 1H), 2.29 (s, 3H), 1.19 (t,  $J = 7.1$  Hz, 3H).  $^{13}\text{C NMR}$  (100 MHz,  $\text{CDCl}_3$ )  $\delta$  167.7, 165.1, 149.7, 130.2, 126.2, 125.7, 124.3, 120.6, 62.1, 46.4, 27.5, 15.6, 14.0. The HRMS Calculated for  $\text{C}_{13}\text{H}_{15}\text{O}_4$   $[\text{M}+\text{H}]^+$  235.0965, found: 235.0963.

---

**Ethyl 7-methyl-2-oxochromane-3-carboxylate (1g):**

0.401 g, 24% yield over two steps, white solid, mp 58-59 °C, new compound,  $R_f = 0.50$  (hexanes/ethyl acetate 5/1).  $^1\text{H NMR}$  (400 MHz,  $\text{CDCl}_3$ )  $\delta$  7.08-6.93 (m, 2H), 6.93-6.82 (m, 1H), 4.25-4.06 (m, 2H), 3.73-3.59 (m, 1H), 3.35-3.23 (m, 1H), 3.13-3.00 (m, 1H), 2.26 (s, 3H), 1.31-1.08 (m, 3H).  $^{13}\text{C NMR}$  (100 MHz,  $\text{CDCl}_3$ )  $\delta$  167.6, 165.0, 149.3, 134.4, 129.1, 128.7, 120.4, 116.4, 62.1, 46.4, 27.2, 20.7, 13.9. The HRMS Calculated for  $\text{C}_{13}\text{H}_{15}\text{O}_4$   $[\text{M}+\text{H}]^+$  235.0965, found: 235.0967.

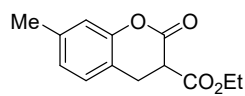

---

**Ethyl 5-methyl-2-oxochromane-3-carboxylate (1i):**

0.820 g, 50% yield over two steps, white solid, mp 61-62 °C, new compound,  $R_f = 0.55$  (hexanes/ethyl acetate 5/1).  $^1\text{H NMR}$  (400 MHz,  $\text{CDCl}_3$ )  $\delta$  7.19-7.07 (m, 1H), 7.03-6.85 (m, 2H), 4.27-4.11 (m, 2H), 3.79-3.66 (m, 1H), 3.39-3.29 (m, 1H), 3.15-3.04 (m, 1H), 2.31 (s, 3H), 1.21 (t,  $J = 7.1$  Hz, 3H).  $^{13}\text{C NMR}$  (100 MHz,  $\text{CDCl}_3$ )  $\delta$  167.7, 164.9, 151.6, 136.6, 128.1, 126.3, 119.5, 114.6, 62.2, 46.1, 24.3, 19.1, 14.0. The HRMS Calculated for  $\text{C}_{13}\text{H}_{15}\text{O}_4$   $[\text{M}+\text{H}]^+$  235.0965, found: 235.0975.

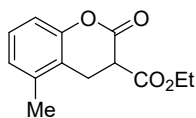

---

**3-Ethyl 6-methyl 2-oxochromane-3,6-dicarboxylate (1l):**

0.905 g, 46% yield over two steps, white solid, new compound, mp 72-73 °C,  $R_f = 0.50$  (hexanes/ethyl acetate 5/1).  $^1\text{H NMR}$  (400 MHz,  $\text{CDCl}_3$ )  $\delta$  8.06-7.81 (m, 2H), 7.19-7.04 (m, 1H), 4.29-4.12 (m, 2H), 3.92 (s, 3H), 3.86-3.75 (m, 1H), 3.46 (dd,  $J = 16.1, 8.0$  Hz, 1H), 3.25 (dd,  $J = 16.2, 6.1$  Hz, 1H), 1.21 (t,  $J = 7.1$  Hz, 3H).  $^{13}\text{C NMR}$  (100 MHz,  $\text{CDCl}_3$ )  $\delta$  167.1, 166.0, 164.0, 154.6, 130.5, 130.1, 126.8, 120.8, 116.9, 62.4, 52.3, 46.0, 27.2, 14.0. The HRMS Calculated for  $\text{C}_{14}\text{H}_{15}\text{O}_6$   $[\text{M}+\text{H}]^+$  279.0863, found: 279.0866.

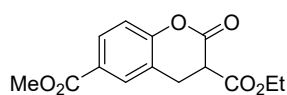

---

**Ethyl 7-methoxy-2-oxochromane-3-carboxylate (1n):**

0.642 g, 37% yield over two steps, white solid, new compound, mp 75-76 °C,  $R_f = 0.70$  (hexanes/ethyl acetate 5/1).  $^1\text{H NMR}$  (400 MHz,  $\text{CDCl}_3$ )  $\delta$  7.18-6.98 (m, 1H), 6.82-6.34 (m, 2H), 4.30-4.09 (m, 2H), 3.94-3.60 (m, 4H), 3.39-3.23 (m, 1H), 3.19-2.99 (m, 1H), 1.20 (t,  $J = 7.1$  Hz, 3H).  $^{13}\text{C NMR}$  (100 MHz,  $\text{CDCl}_3$ )  $\delta$  167.6, 164.8, 160.0, 152.1, 128.7, 112.4, 110.9, 102.4, 62.1, 55.6, 46.6, 26.7, 14.0. The HRMS Calculated for  $\text{C}_{13}\text{H}_{15}\text{O}_5$   $[\text{M}+\text{H}]^+$  251.0914, found: 251.0932.

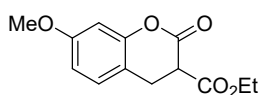

---

**Ethyl 2-oxo-3,4-dihydro-2H-benzo[g]chromene-3-carboxylate (1p):**

Reaction conducted at 1.05 mmol scale. 0.151 g, 31% yield over two steps, white solid, new compound, mp 99-100 °C,  $R_f = 0.60$  (hexanes/ethyl acetate 5/1).  $^1\text{H NMR}$  (400 MHz,  $\text{CDCl}_3$ )  $\delta$  7.79 (d,  $J = 8.0$  Hz, 2H), 7.70 (s, 1H), 7.57-7.39 (m, 3H), 4.26-4.11 (m, 2H), 3.84 (dd,  $J = 8.0, 5.8$  Hz, 1H), 3.58 (dd,  $J = 15.7, 8.1$  Hz, 1H), 3.36 (dd,  $J = 15.9, 5.6$  Hz, 1H), 1.19 (t,  $J = 7.1$  Hz, 3H).  $^{13}\text{C NMR}$  (100 MHz,  $\text{CDCl}_3$ )  $\delta$  167.4, 164.9, 149.4, 133.2, 130.7, 127.5, 127.44, 127.38, 126.8, 125.8, 121.0, 113.2, 62.3, 46.7, 27.9, 14.0. HRMS Calculated for  $\text{C}_{16}\text{H}_{15}\text{O}_4$   $[\text{M}+\text{H}]^+$  271.0965, found: 271.0970.

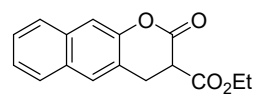

## General Procedure for the Synthesis of Lactones **1** with Sodium Cyanoborohydride:

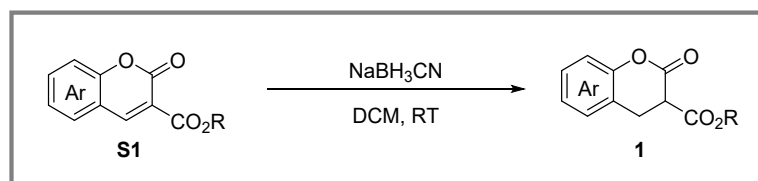

To a solution of the coumarin-3-carboxylates **S1** (7 mmol) in dichloromethane (5 mL), sodium cyanoborohydride (0.660 g, 10.5 mmol) was added slowly at room temperature. Then the mixture was stirred at room temperature until the completion of reduction (monitored by TLC). The volatiles were removed under the reduced pressure. Then, the crude residue was purified by silica gel column using hexanes/ethyl acetate (5:1) as eluent to afford the desired substrate lactones **1**.

### Benzyl 2-oxochromane-3-carboxylate (**1e**):

0.416 g, 18% yield over two steps, white solid, new compound, mp 61-62 °C,  $R_f = 0.40$  (hexanes/ethyl acetate 5/1).  $^1\text{H}$  NMR (400 MHz,  $\text{CDCl}_3$ )  $\delta$  7.33-7.28 (m, 3H), 7.27-7.20 (m, 3H), 7.19-7.15 (m, 1H), 7.12-7.07 (m, 1H), 7.06-7.02 (m, 1H), 5.17 (q,  $J = 12.3$  Hz, 2H), 3.80 (dd,  $J = 8.5, 6.1$  Hz, 1H), 3.41 (dd,  $J = 16.0, 8.5$  Hz, 1H), 3.17 (dd,  $J = 16.0, 6.0$  Hz, 1H).  $^{13}\text{C}$  NMR (100 MHz,  $\text{CDCl}_3$ )  $\delta$  167.5, 164.7, 151.4, 134.9, 128.8, 128.6, 128.5, 128.3, 128.1, 124.9, 120.6, 116.9, 67.8, 46.4, 27.3. The HRMS Calculated for  $\text{C}_{17}\text{H}_{15}\text{O}_4$   $[\text{M}+\text{H}]^+$  283.0965, found: 283.0976.

### Ethyl 7-chloro-2-oxochromane-3-carboxylate (**1k**):

0.366 g, 21% yield over two steps, white solid, new compound, mp 81-82 °C,  $R_f = 0.60$  (hexanes/ethyl acetate 5/1).  $^1\text{H}$  NMR (400 MHz,  $\text{CDCl}_3$ )  $\delta$  7.22-6.96 (m, 3H), 4.26-4.15 (m, 2H), 3.76 (dd,  $J = 8.0, 6.1$  Hz), 3.38 (dd,  $J = 16.1, 8.0$  Hz), 3.15 (dd,  $J = 16.1, 6.1$  Hz), 1.21 (t,  $J = 7.1$  Hz).  $^{13}\text{C}$  NMR (100 MHz,  $\text{CDCl}_3$ )  $\delta$  167.2, 164.0, 151.7, 134.0, 129.2, 125.0, 119.2, 117.3, 62.4, 46.1, 26.9, 14.0. HRMS Calculated for  $\text{C}_{12}\text{H}_{12}\text{ClO}_4$   $[\text{M}+\text{H}]^+$  255.0419 ( $^{35}\text{Cl}$ ), found: 255.0419 ( $^{35}\text{Cl}$ ).  $[\text{M}+\text{H}]^+$  257.0353 ( $^{37}\text{Cl}$ ), found: 257.0393 ( $^{37}\text{Cl}$ ).

## 2.2. Synthesis of (+/-)-Benzyl Substituted Lactones with Quaternary Stereocenter

The substrate lactones **3** with the quaternary stereocenter could be synthesized through direct alkylation of the lactones **1** with halogenated hydrocarbon according to the known methods.<sup>[4]</sup>

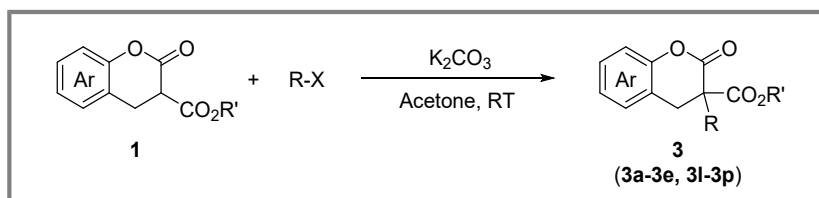

To a mixture of lactone **1** (1.5 mmol), potassium carbonate (0.622 g, 4.5 mmol) and acetone (4 mL), the halogenated hydrocarbon (1.9 mmol) was added. Then, the mixture was stirred under room temperature overnight. After the completion of the reaction (monitored by TLC), the solid was filtered, and the volatiles were removed under the reduced pressure. Then the crude residue was purified by silica gel column using hexanes/ethyl acetate (10:1-5:1) as eluent to afford the

desired products **3**.

**(+/-)-Ethyl 3-benzyl-2-oxochromane-3-carboxylate (3a):**

Reaction conducted under 6 mmol scale. 1.282 g, 47% yield, white solid, the known compound,<sup>[5]</sup>  $R_f = 0.80$  (hexanes/ethyl acetate 5/1),  $^1\text{H NMR}$  (400 MHz,  $\text{CDCl}_3$ )  $\delta$  7.31-7.19 (m, 6H), 7.14-7.00 (m, 3H), 4.09-3.97 (m, 2H), 3.50 (d,  $J = 13.8$  Hz, 1H), 3.32 (d,  $J = 13.8$  Hz, 1H), 3.22 (d,  $J = 15.8$  Hz, 1H), 2.87 (d,  $J = 15.8$  Hz, 1H), 0.99 (t,  $J = 7.1$  Hz, 3H).  $^{13}\text{C NMR}$  (100 MHz,  $\text{CDCl}_3$ )  $\delta$  169.5, 167.1, 151.0, 135.0, 130.8, 128.5, 128.42, 128.38, 127.4, 124.7, 121.5, 116.4, 62.2, 54.6, 39.3, 32.1, 13.8.

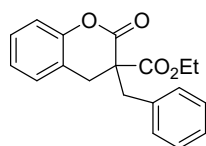

**(+/-)-Ethyl 3-(4-methylbenzyl)-2-oxochromane-3-carboxylate (3b):**

0.431 g, 89% yield, pale pink solid, mp 110-111 °C, new compound,  $R_f = 0.80$  (hexanes/ethyl acetate 5/1).  $^1\text{H NMR}$  (400 MHz,  $\text{CDCl}_3$ )  $\delta$  7.24-7.00 (m, 8H), 4.11-3.96 (m, 2H), 3.46 (d,  $J = 13.8$  Hz, 1H), 3.31-3.18 (m, 2H), 2.87 (d,  $J = 15.8$  Hz, 1H), 2.32 (s, 3H), 1.01 (t,  $J = 7.1$  Hz, 3H).  $^{13}\text{C NMR}$  (100 MHz,  $\text{CDCl}_3$ )  $\delta$  169.6, 167.1, 151.0, 137.0, 131.9, 130.6, 129.1, 128.5, 128.4, 124.6, 121.5, 116.4, 62.2, 54.6, 38.9, 32.0, 21.1, 13.8. HRMS Calculated for  $\text{C}_{20}\text{H}_{21}\text{O}_4$   $[\text{M}+\text{H}]^+$  325.1434, found: 325.1437.

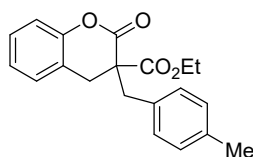

**(+/-)-Ethyl 3-(4-fluorobenzyl)-2-oxochromane-3-carboxylate (3c):**

0.370 g, 75% yield, colorless oil, new compound,  $R_f = 0.70$  (hexanes/ethyl acetate 5/1).  $^1\text{H NMR}$  (400 MHz,  $\text{CDCl}_3$ )  $\delta$  7.29-7.20 (m, 3H), 7.18-6.90 (m, 5H), 4.14-3.91 (m, 2H), 3.45 (d,  $J = 13.9$  Hz, 1H), 3.33-3.17 (m, 2H), 2.87 (d,  $J = 15.7$  Hz, 1H), 0.99 (t,  $J = 7.1$  Hz, 3H).  $^{13}\text{C NMR}$  (100 MHz,  $\text{CDCl}_3$ )  $\delta$  169.4, 167.0, 162.2 (d,  $^1J_{\text{F-C}} = 245.8$  Hz), 150.9, 132.3 (d,  $^3J_{\text{F-C}} = 8.0$  Hz), 130.7 (d,  $^4J_{\text{F-C}} = 3.5$  Hz), 128.5 (d,  $^3J_{\text{F-C}} = 21.9$  Hz), 124.7, 121.2, 116.4, 115.2 (d,  $^2J_{\text{F-C}} = 21.4$  Hz), 62.3, 54.6, 38.5, 32.2, 13.7.  $^{19}\text{F NMR}$  (376 MHz,  $\text{CDCl}_3$ )  $\delta$  -115.21. HRMS Calculated for  $\text{C}_{19}\text{H}_{18}\text{FO}_4$   $[\text{M}+\text{H}]^+$  329.1184, found: 329.1183.

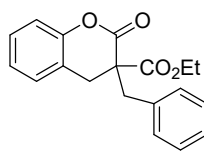

**(+/-)-Ethyl 3-(naphthalen-2-ylmethyl)-2-oxochromane-3-carboxylate (3d):**

0.476 g, 88% yield, pale yellow solid, mp 123-124 °C, new compound,  $R_f = 0.70$  (hexanes/ethyl acetate 5/1).  $^1\text{H NMR}$  (400 MHz,  $\text{CDCl}_3$ )  $\delta$  7.84-7.68 (m, 4H), 7.51-7.37 (m, 3H), 7.24-7.17 (m, 1H), 7.13-6.96 (m, 3H), 4.13-3.96 (m, 2H), 3.58 (dd,  $J = 76.6, 13.8$  Hz, 2H), 3.26 (d,  $J = 15.8$  Hz, 1H), 2.89 (d,  $J = 15.8$  Hz, 1H), 0.99 (t,  $J = 7.1$  Hz, 3H).  $^{13}\text{C NMR}$  (100 MHz,  $\text{CDCl}_3$ )  $\delta$  169.6, 167.2, 151.0, 133.3, 132.62, 132.60, 129.7, 128.7, 128.5, 128.4, 127.9, 127.8, 127.6, 126.2, 126.0, 124.7, 121.4, 116.4, 62.3, 54.7, 39.4, 32.1, 13.8. HRMS Calculated for  $\text{C}_{23}\text{H}_{21}\text{O}_4$   $[\text{M}+\text{H}]^+$  361.1434, found: 361.1431.

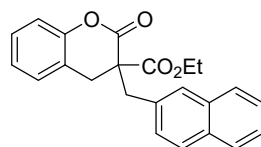

**(+/-)-Ethyl 3-methyl-2-oxochromane-3-carboxylate (3e):**

0.346 g, 99% yield, white solid, mp 92-93 °C, known compound,<sup>[4]</sup>  $R_f = 0.60$  (hexanes/ethyl acetate 10/1).  $^1\text{H NMR}$  (400 MHz,  $\text{CDCl}_3$ )  $\delta$  7.29-7.23 (m, 1H), 7.18 (d,  $J = 7.3$  Hz, 1H), 7.14-6.98 (m, 2H), 4.14-3.94 (m, 2H), 3.36 (d,  $J =$

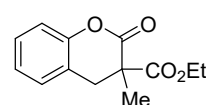

15.8 Hz, 1H), 2.99 (d,  $J = 15.8$  Hz, 1H), 1.62 (s, 3H), 1.00 (t,  $J = 7.1$  Hz, 3H).  $^{13}\text{C}$  NMR (100 MHz,  $\text{CDCl}_3$ )  $\delta$  170.6, 168.2, 151.5, 128.7, 128.2, 124.6, 121.3, 116.5, 62.1, 49.5, 35.4, 20.9, 13.7.

---

**(+/-)-Methyl 3-benzyl-2-oxochromane-3-carboxylate (3l):**

0.275 g, 59% yield, white solid, mp 87-88 °C, new compound,  $R_f = 0.30$  (hexanes/ethyl acetate 30/1).  $^1\text{H}$  NMR (400 MHz,  $\text{CDCl}_3$ )  $\delta$  7.34-7.20 (m, 6H), 7.15-6.98 (m, 3H), 3.60 (s, 3H), 3.40 (dd,  $J = 41.2, 13.8$  Hz, 2H), 3.07 (dd,  $J = 154.4, 15.9$  Hz, 2H).  $^{13}\text{C}$  NMR (100 MHz,  $\text{CDCl}_3$ )  $\delta$  169.9, 166.9, 150.8, 134.9, 130.7, 128.6, 128.5, 128.4, 127.5, 124.8, 121.3, 116.4, 54.5, 53.1, 39.5, 31.8. HRMS Calculated for  $\text{C}_{18}\text{H}_{17}\text{O}_4$   $[\text{M}+\text{H}]^+$  297.1121, found: 297.1131.

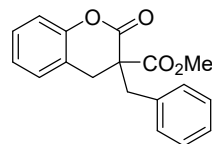

---

**(+/-)-Isopropyl 3-benzyl-2-oxochromane-3-carboxylate (3m):**

0.396 g, 81% yield, pale yellow solid, mp 101-102 °C, new compound,  $R_f = 0.75$  (hexanes/ethyl acetate 10/1).  $^1\text{H}$  NMR (400 MHz,  $\text{CDCl}_3$ )  $\delta$  7.34-7.26 (m, 5H), 7.24-7.18 (m, 1H), 7.12 (d,  $J = 7.1$  Hz, 1H), 7.09-6.98 (m, 2H), 4.91-4.76 (m, 1H), 3.51 (d,  $J = 13.8$  Hz, 1H), 3.30 (d,  $J = 13.8$  Hz, 1H), 3.19 (d,  $J = 15.7$  Hz, 1H), 2.87 (d,  $J = 15.7$  Hz, 1H), 1.04 (d,  $J = 6.3$  Hz, 3H), 0.87 (d,  $J = 6.2$  Hz, 3H).  $^{13}\text{C}$  NMR (100 MHz,  $\text{CDCl}_3$ )  $\delta$  169.1, 167.3, 151.1, 135.2, 130.8, 128.5, 128.4, 128.3, 127.3, 124.6, 121.6, 116.3, 70.1, 54.7, 39.1, 32.3, 21.2, 21.1. HRMS Calculated for  $\text{C}_{20}\text{H}_{21}\text{O}_4$   $[\text{M}+\text{H}]^+$  325.1434, found: 325.1436.

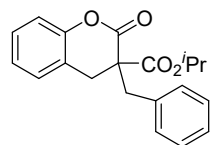

---

**(+/-)-Ethyl 3-benzyl-7-methyl-2-oxochromane-3-carboxylate (3n):**

0.311 g, 64% yield, white solid, mp 104-105 °C, new compound,  $R_f = 0.75$  (hexanes/ethyl acetate 5/1).  $^1\text{H}$  NMR (400 MHz,  $\text{CDCl}_3$ )  $\delta$  7.30-7.25 (m, 5H), 7.03-6.95 (m, 1H), 6.93-6.78 (m, 2H), 4.12-3.97 (m, 2H), 3.39 (dd,  $J = 57.7, 13.8$  Hz, 2H), 3.19 (d,  $J = 15.8$  Hz, 1H), 2.82 (d,  $J = 15.8$  Hz, 1H), 2.30 (s, 3H), 1.02 (t,  $J = 7.1$  Hz, 3H).  $^{13}\text{C}$  NMR (100 MHz,  $\text{CDCl}_3$ )  $\delta$  169.6, 167.3, 150.8, 138.7, 135.1, 130.8, 128.3, 128.1, 127.3, 125.4, 118.2, 116.8, 62.2, 54.7, 39.3, 31.7, 21.2, 13.8. HRMS Calculated for  $\text{C}_{20}\text{H}_{21}\text{O}_4$   $[\text{M}+\text{H}]^+$  325.1434, found: 325.1440.

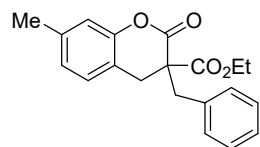

---

**(+/-)-Ethyl 3-benzyl-7-chloro-2-oxochromane-3-carboxylate (3o):**

0.378 g, 73% yield, white solid, mp 125-126 °C, new compound,  $R_f = 0.65$  (hexanes/ethyl acetate 10/1).  $^1\text{H}$  NMR (400 MHz,  $\text{CDCl}_3$ )  $\delta$  7.32-7.24 (m, 5H), 7.13-6.94 (m, 3H), 4.18-3.90 (m, 2H), 3.48 (d,  $J = 13.8$  Hz, 1H), 3.31 (d,  $J = 13.8$  Hz, 1H), 3.21 (d,  $J = 15.9$  Hz, 1H), 2.83 (d,  $J = 15.9$  Hz, 1H), 1.05 (t,  $J = 7.1$  Hz, 3H).  $^{13}\text{C}$  NMR (100 MHz,  $\text{CDCl}_3$ )  $\delta$  169.2, 166.3, 151.3, 134.7, 133.7, 130.7, 129.3, 128.5, 127.5, 124.8, 120.1, 116.8, 62.5, 54.4, 39.4, 31.6, 13.8. HRMS Calculated for  $\text{C}_{19}\text{H}_{17}\text{ClO}_4\text{Na}$   $[\text{M}+\text{Na}]^+$  367.0708 ( $^{35}\text{Cl}$ ), found: 367.0705 ( $^{35}\text{Cl}$ ).  $[\text{M}+\text{H}]^+$  369.0691 ( $^{37}\text{Cl}$ ), found: 369.0680 ( $^{37}\text{Cl}$ ).

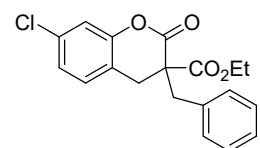

---

**(+/-)-Ethyl 3-benzyl-7-methoxy-2-oxochromane-3-carboxylate (3p):**

0.433 g, 85% yield, white solid, mp 127-128 °C, new compound,  $R_f = 0.70$  (hexanes/ethyl acetate 5/1).  $^1\text{H}$  NMR (400 MHz,  $\text{CDCl}_3$ )  $\delta$  7.31-7.23 (m, 5H), 7.00 (d,  $J = 8.3$  Hz, 1H), 6.68-6.50 (m,

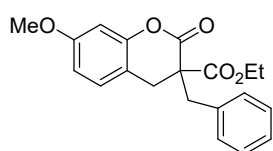

2H), 4.11-3.97 (m, 2H), 3.75 (s, 3H), 3.46 (d,  $J = 13.8$  Hz, 1H), 3.31 (d,  $J = 13.8$  Hz, 1H), 3.16 (d,  $J = 15.6$  Hz, 1H), 2.80 (d,  $J = 15.6$  Hz, 1H), 1.03 (t,  $J = 7.1$  Hz, 3H).  $^{13}\text{C}$  NMR (100 MHz,  $\text{CDCl}_3$ )  $\delta$  169.6, 167.1, 159.8, 151.7, 135.1, 130.8, 128.9, 128.3, 127.4, 113.2, 110.7, 102.0, 62.2, 55.5, 54.8, 39.3, 31.4, 13.8. HRMS Calculated for  $\text{C}_{20}\text{H}_{21}\text{O}_5$   $[\text{M}+\text{H}]^+$  341.1384, found: 341.1385.

### 2.3. Synthesis of (+/-)-Ethyl 3-(2-Methoxyethyl)-2-oxochromane-3-carboxylate (**3h**)

The lactone **3h** with quaternary stereogenic center could be conveniently synthesized through alkylation of lactone **1a** with 1-bromo-2-methoxyethane in the presence of potassium carbonate.

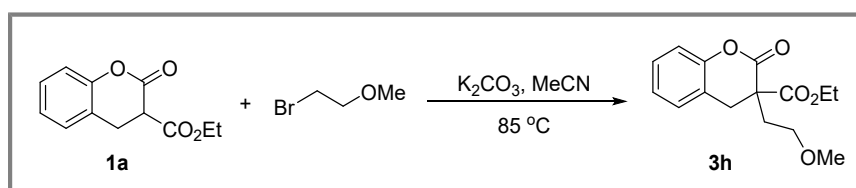

To a mixture of lactone **1a** (0.327 g, 1.5 mmol), potassium carbonate (0.622 g, 4.5 mmol) and acetonitrile (5 mL), 1-bromo-2-methoxyethane (0.18 mL, 1.9 mmol) was added. Then the mixture was refluxed under 85 °C overnight. After the completion of the alkylation (monitored by TLC), the solid was filtered and the volatiles were removed under the reduced pressure. Then the crude residue was purified by silica gel column using hexanes/ethyl acetate (10:1-5:1) as eluent to afford the desired product **3h**.

0.245 g, 58% yield, colorless oil, new compound,  $R_f = 0.50$  (hexanes/ethyl acetate 5/1).  $^1\text{H}$  NMR (400 MHz,  $\text{CDCl}_3$ )  $\delta$  7.27-7.16 (m, 2H), 7.12-7.01 (m, 2H), 4.12-3.96 (m, 2H), 3.64 (t,  $J = 6.1$  Hz, 2H), 3.37 (d,  $J = 15.9$  Hz, 1H), 3.29 (s, 3H), 3.11 (d,  $J = 15.8$  Hz, 1H), 2.28 (t,  $J = 6.1$  Hz, 2H), 1.02 (t,  $J = 7.1$  Hz, 3H).  $^{13}\text{C}$  NMR (100 MHz,  $\text{CDCl}_3$ )  $\delta$  169.6, 167.6, 151.1, 128.6, 128.4, 124.6, 121.5, 116.4, 68.8, 62.1, 58.6, 52.0, 34.1, 33.4, 13.7. HRMS Calculated for  $\text{C}_{15}\text{H}_{19}\text{O}_5$   $[\text{M}+\text{H}]^+$  279.1227, found: 279.1227.

### 2.4. Synthesis of (+/-)-Alkyl Substituted Lactones with Quaternary Center

The substrate lactones with quaternary carbon center **3** were synthesized through alkylation of the above lactone **1a** with alkyl halides.

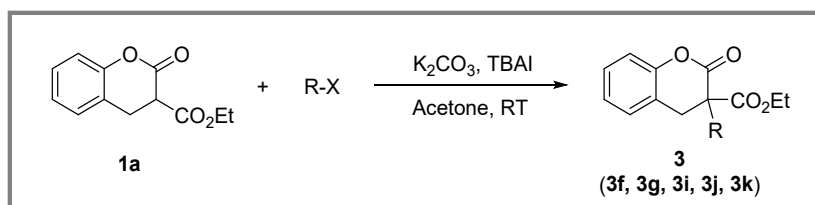

To a mixture of lactone **1a** (0.327 g, 1.5 mmol), potassium carbonate (0.622 g, 4.5 mmol), *tetra*-butylammonium iodide (0.554 g, 1.5 mmol) and acetone (4.0 mL), halogenated hydrocarbons (1.9 mmol) was added. Then the mixture was stirred under room temperature overnight. After the completion of the reaction (monitored by TLC), the solid was filtered, and the volatiles were



removed under the reduced pressure. Then, the crude residue was purified by silica gel column using hexanes/ethyl acetate (10:1-5:1) as eluent to afford the desired products **3**.

---

**(+/-)-Ethyl 3-ethyl-2-oxochromane-3-carboxylate (3f):**

0.200 g, 54% yield, colorless oil, known compound,<sup>[4]</sup>  $R_f = 0.70$  (hexanes/ethyl acetate 10/1). <sup>1</sup>H NMR (400 MHz, CDCl<sub>3</sub>)  $\delta$  7.26-7.16 (m, 2H), 7.12-6.96 (m, 2H), 4.14-3.94 (m, 2H), 3.29 (d,  $J = 15.7$  Hz, 1H), 3.01 (d,  $J = 15.7$  Hz, 1H), 2.13-1.97 (m, 2H), 1.10-0.96 (m, 6H). <sup>13</sup>C NMR (100 MHz, CDCl<sub>3</sub>)  $\delta$  169.8, 167.5, 151.2, 128.6, 128.4, 124.6, 121.5, 116.4, 61.9, 53.6, 32.3, 27.4, 13.8, 9.1.

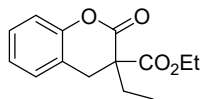

---

**(+/-)-Ethyl 3-methyl-2-oxochromane-3-carboxylate (3g):**

0.366 g, 88% yield, colorless oil, new compound,  $R_f = 0.70$  (hexanes/ethyl acetate 10/1). <sup>1</sup>H NMR (400 MHz, CDCl<sub>3</sub>)  $\delta$  7.25-7.12 (m, 2H), 7.11-6.96 (m, 2H), 4.12-3.93 (m, 2H), 3.29 (d,  $J = 15.7$  Hz, 1H), 3.01 (d,  $J = 15.7$  Hz, 1H), 2.05-1.89 (m, 2H), 1.54-1.44 (m, 1H), 1.40-1.28 (m, 3H), 1.00 (t,  $J = 7.1$  Hz, 3H), 0.91 (t,  $J = 7.1$  Hz, 3H). <sup>13</sup>C NMR (100 MHz, CDCl<sub>3</sub>)  $\delta$  169.9, 167.6, 151.2, 128.5, 128.3, 124.6, 121.6, 116.4, 61.9, 53.3, 34.0, 32.7, 26.7, 23.0, 13.9, 13.8. The HRMS Calculated for C<sub>16</sub>H<sub>21</sub>O<sub>4</sub> [M+H]<sup>+</sup> 277.1434, found: 277.1437.

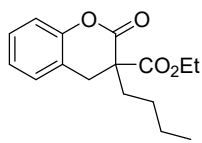

---

**(+/-)-Ethyl 3-(cyclopropylmethyl)-2-oxochromane-3-carboxylate (3i):**

0.171 g, 42% yield, colorless oil, new compound,  $R_f = 0.70$  (hexanes/ethyl acetate 10/1). <sup>1</sup>H NMR (400 MHz, CDCl<sub>3</sub>)  $\delta$  7.26-7.15 (m, 2H), 7.11-6.97 (m, 2H), 4.12-3.96 (m, 2H), 3.38 (d,  $J = 15.8$  Hz, 1H), 3.19 (d,  $J = 15.8$  Hz, 1H), 2.00-1.87 (m, 2H), 1.03 (t,  $J = 7.1$  Hz, 3H), 0.99-0.85 (m, 1H), 0.55-0.44 (m, 2H), 0.16-0.04 (m, 2H). <sup>13</sup>C NMR (100 MHz, CDCl<sub>3</sub>)  $\delta$  169.8, 167.7, 151.1, 128.5, 128.4, 124.6, 121.8, 116.4, 62.0, 53.9, 39.0, 32.7, 13.8, 6.6, 4.9, 4.4. HRMS Calculated for C<sub>16</sub>H<sub>18</sub>O<sub>4</sub>K [M+K]<sup>+</sup> 313.0837, found: 313.0840.

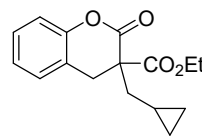

---

**(+/-)-Ethyl 3-(cyclobutylmethyl)-2-oxochromane-3-carboxylate (3j):**

0.143 g, 33% yield, colorless oil, new compound,  $R_f = 0.70$  (hexanes/ethyl acetate 10/1). <sup>1</sup>H NMR (400 MHz, CDCl<sub>3</sub>)  $\delta$  7.26-7.14 (m, 2H), 7.11-6.96 (m, 2H), 4.10-3.92 (m, 2H), 3.31 (d,  $J = 15.8$  Hz, 1H), 2.94 (d,  $J = 15.7$  Hz, 1H), 2.67-2.47 (m, 1H), 2.19-1.99 (m, 4H), 1.90-1.66 (m, 4H), 1.02 (t,  $J = 7.1$  Hz, 3H). <sup>13</sup>C NMR (100 MHz, CDCl<sub>3</sub>)  $\delta$  169.7, 167.6, 151.0, 128.5, 128.4, 124.6, 121.7, 116.4, 62.0, 53.1, 41.0, 32.6, 32.4, 29.9, 29.6, 18.9, 13.8. HRMS Calculated for C<sub>17</sub>H<sub>21</sub>O<sub>4</sub> [M+H]<sup>+</sup> 289.1434, found: 289.1437.

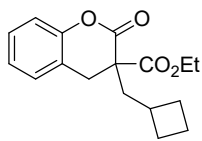

---

**(+/-)-Ethyl 3-(cyclohexylmethyl)-2-oxochromane-3-carboxylate (3k):**

0.288 g, 61% yield, colorless oil, new compound,  $R_f = 0.70$  (hexanes/ethyl acetate 10/1). <sup>1</sup>H NMR (400 MHz, CDCl<sub>3</sub>)  $\delta$  7.25-7.14 (m, 2H), 7.11-6.98 (m, 2H), 4.10-3.96 (m, 2H), 3.33 (d,  $J = 15.7$  Hz, 1H), 3.02 (d,  $J = 15.7$  Hz, 1H), 1.96-1.87 (m, 2H), 1.74-1.58 (m, 5H), 1.55-1.43 (m, 1H), 1.26-1.08 (m, 3H), 1.07-0.95 (m, 5H). <sup>13</sup>C NMR (100 MHz, CDCl<sub>3</sub>)  $\delta$  170.2, 167.7, 151.1, 128.5, 128.4, 124.6,

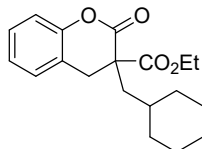

121.6, 116.4, 62.0, 53.1, 40.8, 34.7, 34.4, 34.3, 32.7, 26.3, 26.1, 13.7. HRMS Calculated for  $C_{19}H_{25}O_4 [M+H]^+$  317.1747, found: 317.1758.

---

### 3. Condition Optimization for Kinetic Resolution

**General Procedure:** The Pd(OCOCF<sub>3</sub>)<sub>2</sub> (0.015 mmol, 4.8 mg, 5 mol%), ligand (0.018 mmol, 6 mol%) and degassed anhydrous acetone (1.0 mL) were placed in a dried Schlenk tube under nitrogen atmosphere. The mixture was stirred under room temperature for 1 hour, the solvent was removed under vacuum to give the catalyst. Then, this catalyst was taken into a glove box filled with nitrogen gas and dissolved in solvent (1.0 mL). To the lactones **3a** (0.3 mmol, 93.0 mg) added this catalyst solution, and then the mixture was transferred to an autoclave, which was charged hydrogen gas (400 psi). The reaction mixture was stirred at 40 °C for 48 hours. After cooling to room temperature and the release of the hydrogen gas, the autoclave was opened. To the mixture added sodium cyanoborohydride (7.5 mg, 0.12 mmol). The mixture was stirred under room temperature for 2 hours, then the volatiles were removed under the reduced pressure. The crude residue was purified by column chromatography on silica gel using hexanes/ethyl acetate (10:1-5:1) as eluent to give the chiral reductive products **3a'** and **4a**.

The optimal conditions were identified as follow: Lactone **3a** (0.3 mmol), Pd(OCOCF<sub>3</sub>)<sub>2</sub> (5 mol%), ligand **L5** (6 mol%), H<sub>2</sub> (400 psi), HFIP (1.0 mL), 40 °C, 48 h (entry 8).

**Table S1.** Optimization of the KR Reaction Conditions

| Entry <sup>a</sup> | Ligand    | Solvent            | Conv. [%] <sup>b</sup> | Yield of <b>4a</b> <sup>b</sup> | Ee [%] <sup>c</sup> |           | S <sup>d</sup> |
|--------------------|-----------|--------------------|------------------------|---------------------------------|---------------------|-----------|----------------|
|                    |           |                    |                        |                                 | <b>3a'</b>          | <b>4a</b> |                |
| 1                  | <b>L1</b> | TFE                | 13                     | 12                              | 31                  | 77        | 10.6           |
| 2                  | <b>L1</b> | DCM                | <5                     | <5                              | -                   | -         | -              |
| 3                  | <b>L1</b> | HFIP               | 54                     | 52                              | 89                  | 72        | 17.6           |
| 4                  | <b>L1</b> | Toluene            | <5                     | <5                              | -                   | -         | -              |
| 5                  | <b>L2</b> | HFIP               | 62                     | 61                              | 96                  | 50        | 11.3           |
| 6                  | <b>L3</b> | HFIP               | 54                     | 54                              | 95                  | 56        | 12.3           |
| 7                  | <b>L4</b> | HFIP               | >95                    | >95                             | -                   | -         | -              |
| 8                  | <b>L5</b> | HFIP               | 53                     | 54 (52) <sup>e</sup>            | 93                  | 71        | 19.3           |
| 9                  | <b>L6</b> | HFIP               | <5                     | <5                              | -                   | -         | -              |
| 10                 | <b>L5</b> | HFIP/Toluene = 5:1 | 42                     | 42                              | 59                  | 82        | 18.4           |
| 11                 | <b>L5</b> | HFIP/DCM = 5:1     | 53                     | 52                              | 77                  | 75        | 16.2           |
| 12                 | <b>L5</b> | HFIP/TFE = 5:1     | 55                     | 54                              | 84                  | 76        | 18.9           |

<sup>a</sup> Lactone **3a** (0.3 mmol), Pd(OCOCF<sub>3</sub>)<sub>2</sub> (5 mol%), chiral ligand (6 mol%), H<sub>2</sub> (400 psi), solvent (1 mL), 40 °C, 48 h. <sup>b</sup> Determined by NMR, using CH<sub>2</sub>Br<sub>2</sub> as internal standard. <sup>c</sup> Determined by HPLC. <sup>d</sup> Calculated selectivity factors: C = ee of SM/(ee of SM + ee of TM), s = ln[(1 - C)(1 - ee of SM)]/ln[(1 - C)(1 + ee of SM)]. <sup>e</sup> Isolated yield based on the lactone **3a**.

## 4. Pd-catalyzed Hydrogenative DKR and KR of Lactones

### 4.1 Pd-catalyzed Hydrogenative Dynamic Kinetic Resolution of Lactones

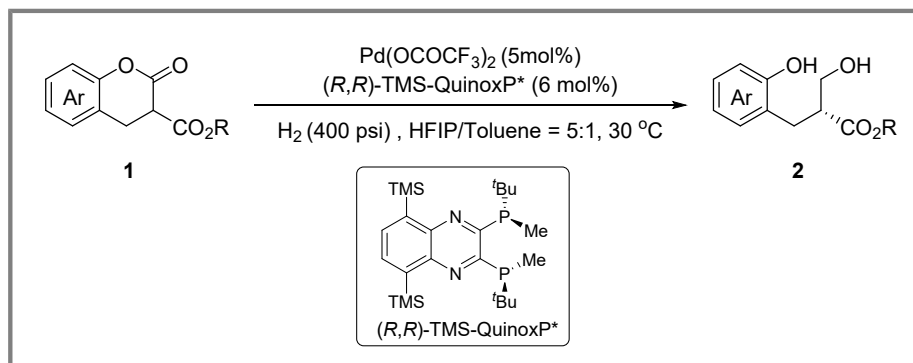

**General Procedure:** Pd(OCOCF<sub>3</sub>)<sub>2</sub> (0.01 mmol, 3.2 mg, 5 mol%), chiral ligand (*R,R*)-TMS-QuinoxP\* (0.012 mmol, 5.8 mg, 6 mol%) and degassed anhydrous acetone (1.0 mL) were placed in a dried Schlenk tube under nitrogen atmosphere. The mixture was stirred under room temperature for 1 hour, the solvent was removed under vacuum to give the catalyst. Then, this catalyst was taken into a glove box filled with nitrogen and dissolved in solvent (HFIP/toluene = 5:1, 1.0 mL). To the lactones **1** (0.2 mmol) was added the catalyst solution, and the mixture was transferred to an autoclave, which was charged hydrogen gas (400 psi). The reaction mixture was stirred at 30 °C for 48 hours. After release of the hydrogen gas, the autoclave was opened, and the volatiles were removed under the reduced pressure. Then the residue was purified by column chromatography on silica gel using dichloromethane/methanol (40:1) as eluent to give the reductive products **2**.

The racemates were prepared by reduction of lactones **1** with sodium borohydride in methanol.

#### (+)-Ethyl 3-hydroxy-2-(2-hydroxybenzyl)propanoate (**2a**):

44 mg, 98% yield, colorless oil, new compound, *R<sub>f</sub>* = 0.30 (dichloromethane/methanol 40/1), 91% ee, [α]<sup>20</sup><sub>D</sub> = +11.28 (*c* 0.86, CHCl<sub>3</sub>). <sup>1</sup>H NMR (400 MHz, CDCl<sub>3</sub>) δ 7.54 (brs, 1H), 7.19-6.99 (m, 2H), 6.97-6.70 (m, 2H), 4.31-4.09 (m, 2H), 3.95-3.80 (m, 1H), 3.69-3.58 (m, 1H), 3.40 (brs, 1H), 3.09-2.91 (m, 2H), 2.88-2.74 (m, 1H), 1.26 (t, *J* = 7.1 Hz, 3H). <sup>13</sup>C NMR (100 MHz, CDCl<sub>3</sub>) δ 175.2, 154.9, 131.1, 128.3, 124.6, 120.8, 116.7, 61.5, 61.2, 47.7, 28.1, 14.2. HPLC: Chiralpak AS-H column, 230 nm, 30 °C, *n*-Hexane/*i*-PrOH = 90/10, flow = 0.8 mL/min, retention time 16.6 min and 19.3 min (major). HRMS Calculated for C<sub>12</sub>H<sub>17</sub>O<sub>4</sub> [M+H]<sup>+</sup> 225.1121, found: 225.1120.

#### (+)-Methyl 3-hydroxy-2-(2-hydroxybenzyl)propanoate (**2b**):

33 mg, 79% yield, colorless oil, new compound, *R<sub>f</sub>* = 0.30 (dichloromethane/methanol 40/1), 83% ee, [α]<sup>20</sup><sub>D</sub> = +9.85 (*c* 0.66, CHCl<sub>3</sub>). <sup>1</sup>H NMR (400 MHz, CDCl<sub>3</sub>) δ 7.46 (brs, 1H), 7.15-7.06 (m, 2H), 6.90-6.80 (m, 2H), 3.91-3.85 (m, 1H), 3.73 (s, 3H), 3.67-3.60 (m, 1H), 3.36 (brs, 1H), 3.06-2.94 (m, 2H), 2.88-2.80 (m, 1H). <sup>13</sup>C NMR (100 MHz, CDCl<sub>3</sub>) δ 175.6, 154.8, 131.1, 128.3, 124.5, 120.8, 116.7, 61.4, 52.2, 47.6, 28.1. The HPLC: Chiralpak IB column, 230 nm, 30 °C, *n*-Hexane/*i*-PrOH = 90/10, flow = 0.8 mL/min, retention time 17.2 min (major) and 18.7 min. HRMS Calculated for C<sub>11</sub>H<sub>15</sub>O<sub>4</sub> [M+H]<sup>+</sup> 211.0965, found: 211.0970.

---

---

**(+)-Isopropyl 3-hydroxy-2-(2-hydroxybenzyl)propanoate (2c):**

46 mg, 97% yield, colorless oil, new compound,  $R_f = 0.35$  (dichloromethane/methanol 40/1), 89%

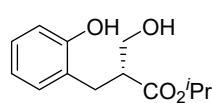

ee,  $[\alpha]_D^{20} = +13.59$  ( $c$  0.92,  $\text{CHCl}_3$ ).  $^1\text{H NMR}$  (400 MHz,  $\text{CDCl}_3$ )  $\delta$  7.58 (brs, 1H), 7.16-7.02 (m, 2H), 6.94-6.74 (m, 2H), 5.15-4.96 (m, 1H), 3.88 (dd,  $J = 11.5, 3.8$  Hz, 1H), 3.62 (dd,  $J = 11.4, 4.5$  Hz, 1H), 3.39 (brs, 1H), 3.08-2.91 (m, 2H), 2.84-2.69 (m, 1H), 1.32-1.16 (m, 6H).  $^{13}\text{C NMR}$  (100 MHz,  $\text{CDCl}_3$ )  $\delta$  174.8, 154.9, 131.1, 128.3, 124.6, 120.7, 116.8, 68.8, 61.5, 47.8, 28.2, 21.8, 21.7. The HPLC: Chiralpak AS-H column, 230 nm, 30 °C,  $n$ -Hexane/ $i$ -PrOH = 90/10, flow = 0.8 mL/min, retention time 12.8 min and 15.2 min (major). HRMS Calculated for  $\text{C}_{13}\text{H}_{19}\text{O}_4$   $[\text{M}+\text{H}]^+$  239.1278, found: 239.1280.

---

**(+)-tert-Butyl 3-hydroxy-2-(2-hydroxybenzyl)propanoate (2d):**

44 mg, 87% yield, colorless oil, new compound,  $R_f = 0.37$  (dichloromethane/methanol 40/1), 81%

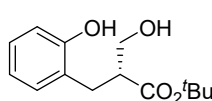

ee,  $[\alpha]_D^{20} = +13.41$  ( $c$  0.88,  $\text{CHCl}_3$ ).  $^1\text{H NMR}$  (400 MHz,  $\text{CDCl}_3$ )  $\delta$  7.51 (brs, 1H), 7.20-7.05 (m, 2H), 6.98-6.74 (m, 2H), 3.89 (dd,  $J = 11.5, 3.4$  Hz, 1H), 3.55 (dd,  $J = 11.2, 3.2$  Hz, 1H), 3.19 (brs, 1H), 3.08-2.88 (m, 2H), 2.78-2.61 (m, 1H), 1.47 (s, 9H).  $^{13}\text{C NMR}$  (100 MHz,  $\text{CDCl}_3$ )  $\delta$  174.9, 155.2, 131.1, 128.3, 124.7, 120.7, 117.2, 82.1, 61.5, 48.3, 28.3, 28.1. HPLC: Chiralpak AS-H column, 230 nm, 30 °C,  $n$ -Hexane/ $i$ -PrOH = 95/5, flow = 0.8 mL/min, retention time 14.8 min and 16.8 min (major). HRMS Calculated for  $\text{C}_{14}\text{H}_{20}\text{O}_4\text{Na}$   $[\text{M}+\text{Na}]^+$  275.1259, found: 275.1249.

---

**(+)-Benzyl 3-hydroxy-2-(2-hydroxybenzyl)propanoate (2e):**

56 mg, 99% yield, white solid, new compound, mp 78-79 °C,  $R_f = 0.20$  (dichloromethane/me-

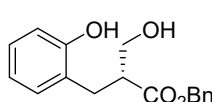

thanol 40/1), 88% ee,  $[\alpha]_D^{20} = +7.82$  ( $c$  1.12,  $\text{CHCl}_3$ ).  $^1\text{H NMR}$  (400 MHz,  $\text{CDCl}_3$ )  $\delta$  7.71-7.27 (m, 6H), 7.15-7.04 (m, 2H), 6.91-6.77 (m, 2H), 5.24-5.09 (m, 2H), 3.91 (dd,  $J = 11.4, 3.7$  Hz, 1H), 3.66 (dd,  $J = 11.5, 4.5$  Hz, 1H), 3.31 (brs, 1H), 3.10-2.98 (m, 2H), 2.93-2.85 (m, 1H).  $^{13}\text{C NMR}$  (100 MHz,  $\text{CDCl}_3$ )  $\delta$  174.9, 154.8, 135.5, 131.1, 128.7, 128.5, 128.33, 128.30, 124.5, 120.9, 116.7, 66.9, 61.4, 47.7, 28.1. The HPLC: Chiralpak AS-H column, 230 nm, 30 °C,  $n$ -Hexane/ $i$ -PrOH = 90/10, flow = 0.8 mL/min, retention time 22.6 min (minor) and 24.4 min (major). HRMS Calculated for  $\text{C}_{17}\text{H}_{19}\text{O}_4$   $[\text{M}+\text{H}]^+$  287.1279, found: 287.1279.

---

**(+)-Ethyl 3-hydroxy-2-(2-hydroxy-3-methylbenzyl)propanoate (2f):**

47 mg, 99% yield, pale yellow oil, new compound,  $R_f = 0.40$  (dichloromethane/methanol 40/1),

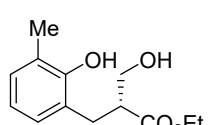

72% ee,  $[\alpha]_D^{20} = +8.08$  ( $c$  0.94,  $\text{CHCl}_3$ ).  $^1\text{H NMR}$  (400 MHz,  $\text{CDCl}_3$ )  $\delta$  7.24 (brs, 1H), 7.00 (dd,  $J = 21.8, 7.4$  Hz, 2H), 6.83-6.71 (m, 1H), 4.22 (q,  $J = 7.1$  Hz, 2H), 3.93 (dd,  $J = 11.5, 3.3$  Hz, 1H), 3.58 (d,  $J = 8.9$  Hz, 1H), 3.11 (brs, 1H), 3.07-2.96 (m, 2H), 2.79-2.72 (m, 1H), 2.26 (s, 3H), 1.30 (t,  $J = 7.1$  Hz, 3H).  $^{13}\text{C NMR}$  (100 MHz,  $\text{CDCl}_3$ )  $\delta$  175.5, 153.4, 129.6, 128.5, 125.9, 124.0, 120.3, 61.31, 61.26, 47.7, 28.3, 16.5, 14.2. HPLC: Chiralpak AS-H column, 230 nm, 30 °C,  $n$ -Hexane/ $i$ -PrOH = 90/10, flow = 0.8 mL/min, retention time 10.0 min and 10.6 min (major). The HRMS Calculated for  $\text{C}_{13}\text{H}_{19}\text{O}_4$   $[\text{M}+\text{H}]^+$  239.1278, found: 239.1274.

---

---

**(+)-Ethyl 3-hydroxy-2-(2-hydroxy-4-methylbenzyl)propanoate (2g):**

43 mg, 90% yield, colorless oil, new compound,  $R_f = 0.30$  (DCM/methanol 40/1), 89% ee,  $[\alpha]_D^{20} = +9.77$  ( $c$  0.86,  $\text{CHCl}_3$ ).  $^1\text{H NMR}$  (400 MHz,  $\text{CDCl}_3$ )  $\delta$  7.45 (brs, 1H), 6.97 (d,  $J = 7.4$  Hz, 1H), 6.77-6.57 (m, 2H), 4.19 (q,  $J = 7.1$  Hz, 2H), 3.88 (dd,  $J = 11.4, 3.6$  Hz, 1H), 3.64 (d,  $J = 7.9$  Hz, 1H), 3.40 (brs, 1H), 3.05-2.89 (m, 2H), 2.85-2.73 (m, 1H), 2.26 (s, 3H), 1.27 (t,  $J = 7.1$  Hz, 3H).  $^{13}\text{C NMR}$  (100 MHz,  $\text{CDCl}_3$ )  $\delta$  175.3, 154.7, 138.3, 130.8, 121.6, 121.4, 117.3, 61.4, 61.2, 47.8, 27.8, 21.1, 14.2. HPLC: Chiralpak IB, 230 nm, 30 °C,  $n$ -Hexane/ $i$ -PrOH = 90/10, flow = 0.8 mL/min, retention time 21.2 min (major) and 22.8 min. HRMS Calculated for  $\text{C}_{13}\text{H}_{19}\text{O}_4$   $[\text{M}+\text{H}]^+$  239.1278, found: 239.1282.

---

**(+)-Ethyl 3-hydroxy-2-(2-hydroxy-5-methylbenzyl)propanoate (2h):**

42 mg, 88% yield, colorless oil, new compound,  $R_f = 0.40$  (dichloromethane/methanol 40/1), 90% ee,  $[\alpha]_D^{20} = +8.33$  ( $c$  0.84,  $\text{CHCl}_3$ ).  $^1\text{H NMR}$  (400 MHz,  $\text{CDCl}_3$ )  $\delta$  6.99-6.86 (m, 2H), 6.76 (d,  $J = 8.8$  Hz, 1H), 4.25-4.13 (m, 2H), 3.89 (dd,  $J = 11.5, 3.7$  Hz, 1H), 3.62 (dd,  $J = 11.6, 4.5$  Hz, 1H), 3.05-2.92 (m, 2H), 2.83-2.74 (m, 1H), 2.24 (s, 3H), 1.27 (t,  $J = 7.1$  Hz, 3H).  $^{13}\text{C NMR}$  (100 MHz,  $\text{CDCl}_3$ )  $\delta$  175.3, 152.6, 131.5, 129.9, 128.8, 124.3, 116.6, 61.4, 61.2, 47.7, 28.1, 20.5, 14.2. HPLC: Chiralpak AS-H column, 230 nm, 30 °C,  $n$ -Hexane/ $i$ -PrOH = 95/5, flow = 0.8 mL/min, retention time 25.2 min and 27.6 min (major). HRMS Calculated for  $\text{C}_{13}\text{H}_{19}\text{O}_4$   $[\text{M}+\text{H}]^+$  239.1278, found: 239.1278.

---

**(+)-Ethyl 3-hydroxy-2-(2-hydroxy-6-methylbenzyl)propanoate (2i):**

41 mg, 86% yield, colorless oil, new compound,  $R_f = 0.40$  (dichloromethane/methanol 40/1), 80% ee,  $[\alpha]_D^{20} = +17.19$  ( $c$  0.82,  $\text{CHCl}_3$ ).  $^1\text{H NMR}$  (400 MHz,  $\text{CDCl}_3$ )  $\delta$  7.58 (brs, 1H), 7.08-6.95 (m, 1H), 6.75 (d,  $J = 7.8$  Hz, 2H), 4.22 (q,  $J = 7.1$  Hz, 2H), 4.04-3.87 (m, 1H), 3.68-3.38 (m, 2H), 3.14-2.96 (m, 2H), 2.81-2.65 (m, 1H), 2.31 (s, 3H), 1.29 (t,  $J = 7.1$  Hz, 3H).  $^{13}\text{C NMR}$  (100 MHz,  $\text{CDCl}_3$ )  $\delta$  175.5, 155.2, 138.1, 127.6, 123.4, 122.8, 114.5, 61.6, 61.3, 45.9, 24.4, 19.4, 14.2. HPLC: Chiral pak AS-H column, 230 nm, 30 °C,  $n$ -Hexane/ $i$ -PrOH = 90/10, flow = 0.8 mL/min, retention time 13.2 min and 16.6 min (major). HRMS Calculated for  $\text{C}_{13}\text{H}_{19}\text{O}_4$   $[\text{M}+\text{H}]^+$  239.1278, found: 239.1272.

---

**(+)-Ethyl 2-(5-fluoro-2-hydroxybenzyl)-3-hydroxypropanoate (2j):**

47 mg, 97% yield, pale yellow oil, new compound,  $R_f = 0.30$  (dichloromethane/methanol 40/1), 79% ee,  $[\alpha]_D^{20} = +12.73$  ( $c$  0.94,  $\text{CHCl}_3$ ).  $^1\text{H NMR}$  (400 MHz,  $\text{CDCl}_3$ )  $\delta$  7.38 (brs, 1H), 6.96-6.73 (m, 3H), 4.20 (q,  $J = 7.1$  Hz, 2H), 3.91 (dd,  $J = 11.5, 3.6$  Hz, 1H), 3.60 (dd,  $J = 11.5, 4.1$  Hz, 1H), 3.21 (brs, 1H), 3.05-2.91 (m, 2H), 2.85-2.73 (m, 1H), 1.28 (t,  $J = 7.1$  Hz, 3H).  $^{13}\text{C NMR}$  (100 MHz,  $\text{CDCl}_3$ )  $\delta$  175.0, 157.0 (d,  $^1J_{\text{F-C}} = 238.1$  Hz), 151.0 (d,  $^4J_{\text{F-C}} = 2.0$  Hz), 126.1 (d,  $^3J_{\text{F-C}} = 7.2$  Hz), 118.0 (d,  $^3J_{\text{F-C}} = 8.1$  Hz), 116.9 (d,  $^2J_{\text{F-C}} = 22.6$  Hz), 114.7 (d,  $^2J_{\text{F-C}} = 22.7$  Hz), 61.4, 61.3, 47.4, 28.2, 14.1.  $^{19}\text{F NMR}$  (376 MHz,  $\text{CDCl}_3$ )  $\delta$  -124.01. HPLC: Chiralpak IB column, 230 nm, 30 °C,  $n$ -Hexane/ $i$ -PrOH = 90/10, flow = 0.8 mL/min, retention time 10.2 min and 11.5 min (major). HRMS Calculated for  $\text{C}_{12}\text{H}_{16}\text{FO}_4$   $[\text{M}+\text{H}]^+$  243.1027, found: 243.1027.

---

---

**(+)-Ethyl 2-(4-chloro-2-hydroxybenzyl)-3-hydroxypropanoate (2k):**

50 mg, 97% yield, colorless oil, new compound,  $R_f = 0.40$  (dichloromethane/methanol 40/1), 81%

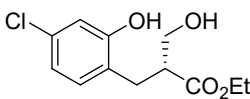  
ee,  $[\alpha]_D^{20} = +9.97$  ( $c$  1.00,  $\text{CHCl}_3$ ).  $^1\text{H NMR}$  (400 MHz,  $\text{CDCl}_3$ )  $\delta$  7.85 (brs, 1H), 7.01 (d,  $J = 8.1$  Hz, 1H), 6.91-6.72 (m, 2H), 4.19 (q,  $J = 7.1$  Hz, 2H), 3.89 (dd,  $J = 11.5, 3.7$  Hz, 1H), 3.63 (dd,  $J = 11.4, 4.4$  Hz, 1H), 3.33 (brs, 1H), 3.04-2.89 (m, 2H), 2.84-2.73 (m, 1H), 1.27 (t,  $J = 7.1$  Hz, 3H).  $^{13}\text{C NMR}$  (100 MHz,  $\text{CDCl}_3$ )  $\delta$  175.1, 155.7, 133.2, 131.8, 123.2, 120.8, 117.1, 61.44, 61.41, 47.5, 27.8, 14.2. HPLC: Chiralpak AS-H column, 230 nm, 30 °C,  $n$ -Hexane/ $i$ -PrOH = 90/10, flow = 0.8 mL/min, retention time 14.4 min and 16.2 min (major). HRMS Calculated for  $\text{C}_{12}\text{H}_{16}\text{ClO}_4$   $[\text{M}+\text{H}]^+$   $\text{Cl}^{35}$  259.0732, found: 259.0746.  $[\text{M}+\text{H}]^+$   $\text{Cl}^{37}$  261.0706, found: 261.0716.

---

**(+)-Methyl 3-(3-ethoxy-2-(hydroxymethyl)-3-oxopropyl)-4-hydroxybenzoate (2l):**

56 mg, 99% yield, colorless oil, new compound,  $R_f = 0.35$  (dichloromethane/methanol 40/1), 76%

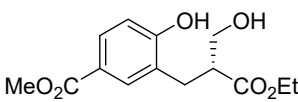  
ee,  $[\alpha]_D^{20} = +31.16$  ( $c$  1.12,  $\text{CHCl}_3$ ).  $^1\text{H NMR}$  (400 MHz,  $\text{CDCl}_3$ )  $\delta$  7.91-7.77 (m, 2H), 6.90 (d,  $J = 8.4$  Hz, 1H), 4.26-4.14 (m, 2H), 3.92 (dd,  $J = 11.6, 3.8$  Hz, 1H), 3.88 (s, 3H), 3.63 (dd,  $J = 11.6, 4.6$  Hz, 1H), 3.07-2.99 (m, 2H), 2.87-2.81 (m, 1H), 1.29 (t,  $J = 7.1$  Hz, 3H).  $^{13}\text{C NMR}$  (100 MHz,  $\text{CDCl}_3$ )  $\delta$  175.1, 167.1, 159.7, 133.2, 130.4, 124.5, 122.4, 116.8, 61.4, 61.4, 52.0, 47.4, 28.1, 14.1. HPLC: Chiralpak AS-H column, 254 nm, 30 °C,  $n$ -Hexane/ $i$ -PrOH = 90/10, flow = 0.8 mL/min, retention time 22.5 min and 26.0 min (major). The HRMS Calculated for  $\text{C}_{14}\text{H}_{18}\text{O}_6\text{K}$   $[\text{M}+\text{K}]^+$  321.0735, found: 321.0728.

---

**(+)-Ethyl 3-hydroxy-2-(2-hydroxy-5-methoxybenzyl)propanoate (2m):**

30 mg, 59% yield, colorless oil, new compound,  $R_f = 0.40$  (dichloromethane/methanol 40/1), 89%

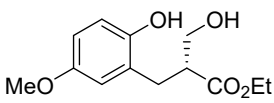  
ee,  $[\alpha]_D^{20} = +4.83$  ( $c$  0.60,  $\text{CHCl}_3$ ).  $^1\text{H NMR}$  (400 MHz,  $\text{CDCl}_3$ )  $\delta$  7.05 (brs, 1H), 6.81 (d,  $J = 8.6$  Hz, 1H), 6.78-6.54 (m, 2H), 4.20 (q,  $J = 7.1$  Hz, 2H), 3.91 (dd,  $J = 11.4, 3.2$  Hz, 1H), 3.74 (s, 3H), 3.58 (d,  $J = 10.9$  Hz, 1H), 3.16 (brs, 1H), 3.08-2.91 (m, 2H), 2.85-2.72 (m, 1H), 1.28 (t,  $J = 7.1$  Hz, 3H).  $^{13}\text{C NMR}$  (100 MHz,  $\text{CDCl}_3$ )  $\delta$  175.2, 153.7, 148.9, 125.6, 117.8, 116.0, 113.5, 61.33, 61.29, 55.7, 47.6, 28.3, 14.2. HPLC: Chiralpak AS-H column, 230 nm, 30 °C,  $n$ -Hexane/ $i$ -PrOH = 90/10, flow = 0.8 mL/min, retention time 19.5 min and 21.1 min (major). The HRMS Calculated for  $\text{C}_{13}\text{H}_{19}\text{O}_5$   $[\text{M}+\text{H}]^+$  255.1227, found: 255.1237.

---

**(+)-Ethyl 3-hydroxy-2-(2-hydroxy-4-methoxybenzyl)propanoate (2n):**

46 mg, 91% yield, colorless oil, new compound,  $R_f = 0.40$  (dichloromethane/methanol 40/1), 88%

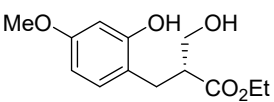  
ee,  $[\alpha]_D^{20} = +12.17$  ( $c$  0.92,  $\text{CHCl}_3$ ).  $^1\text{H NMR}$  (400 MHz,  $\text{CDCl}_3$ )  $\delta$  7.64 (brs, 1H), 6.98 (d,  $J = 8.2$  Hz, 1H), 6.57-6.25 (m, 2H), 4.19 (q,  $J = 7.1$  Hz, 2H), 3.88 (dd,  $J = 11.5, 3.8$  Hz, 1H), 3.74 (s, 3H), 3.62 (dd,  $J = 11.5, 4.5$  Hz, 1H), 3.33 (brs, 1H), 3.02-2.86 (m, 2H), 2.82-2.68 (m, 1H), 1.27 (t,  $J = 7.1$  Hz, 3H).  $^{13}\text{C NMR}$  (100 MHz,  $\text{CDCl}_3$ )  $\delta$  175.3, 159.8, 155.9, 131.5, 116.7, 106.6, 102.5, 61.4, 61.2, 55.3, 47.8, 27.6, 14.2. HPLC: Chiralpak IB column, 230 nm, 30 °C,  $n$ -Hexane/ $i$ -PrOH = 95/5, flow = 0.8 mL/min, retention time 32.7 min (major) and 35.2 min. The HRMS Calculated for  $\text{C}_{13}\text{H}_{19}\text{O}_5$



[M+H]<sup>+</sup> 255.1227, found: 255.1234.

---

**(+)-Ethyl (*R*)-3-hydroxy-2-((2-hydroxynaphthalen-1-yl)methyl)propanoate (2o):**

51 mg, 93% yield, white solid, new compound, mp 82-83 °C, *R*<sub>f</sub> = 0.60 (dichloromethane/methanol 40/1), 87% ee, [α]<sup>20</sup><sub>D</sub> = +10.11 (*c* 1.00, CHCl<sub>3</sub>).

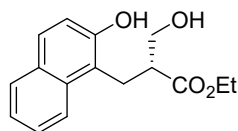

<sup>1</sup>H NMR (400 MHz, CDCl<sub>3</sub>) δ 8.08 (brs, 1H), 7.90 (d, *J* = 8.5 Hz, 1H), 7.79 (d, *J* = 8.1 Hz, 1H), 7.69 (d, *J* = 8.8 Hz, 1H), 7.52 (t, *J* = 7.7 Hz, 1H), 7.42-7.30 (m, 1H), 7.21 (d, *J* = 8.8 Hz, 1H), 4.28 (q, *J* = 7.1 Hz, 2H), 4.09-3.95 (m, 1H), 3.72-3.27 (m, 4H), 3.00-2.93 (m, 1H), 1.34 (t, *J* = 7.1 Hz, 3H). <sup>13</sup>C NMR (100 MHz, CDCl<sub>3</sub>) δ 175.8, 153.2, 133.2, 129.5, 128.92, 128.85, 126.7, 123.2, 122.2, 119.6, 115.6, 61.5, 61.4, 45.9, 23.6, 14.2. HPLC: Chiralpak AS-H column, 230 nm, 30 °C, *n*-Hexane/*i*-PrOH = 90/10, flow = 0.8 mL/min, retention time 13.1 min (minor) and 15.6 min (major). HRMS Calculated for C<sub>16</sub>H<sub>19</sub>O<sub>4</sub> [M+H]<sup>+</sup> 275.1278, found: 275.1285.

---

**(+)-Ethyl 3-hydroxy-2-((3-hydroxynaphthalen-2-yl)methyl)propanoate (2p):**

38 mg, 70% yield, colorless oil, new compound, *R*<sub>f</sub> = 0.40 (dichloromethane/methanol 40/1), 69% ee, [α]<sup>20</sup><sub>D</sub> = +12.55 (*c* 0.76, CHCl<sub>3</sub>).

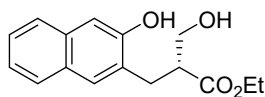

<sup>1</sup>H NMR (400 MHz, CDCl<sub>3</sub>) δ 7.82-7.52 (m, 3H), 7.41-7.35 (m, 1H), 7.33-7.28 (m, 1H), 7.23 (s, 1H), 4.21 (q, *J* = 7.1 Hz, 2H), 3.93 (dd, *J* = 11.5, 3.6 Hz, 1H), 3.66 (dd, *J* = 11.5, 4.7 Hz, 1H), 3.24-3.14 (m, 2H), 2.97-2.90 (m, 1H), 1.28 (t, *J* = 7.1 Hz, 3H). <sup>13</sup>C NMR (100 MHz, CDCl<sub>3</sub>) δ 175.2, 153.2, 134.0, 130.1, 129.0, 127.3, 127.2, 126.1, 126.0, 123.7, 111.3, 61.6, 61.3, 47.9, 28.7, 14.2. HPLC: Chiralpak IB column, 230 nm, 30 °C, *n*-Hexane/*i*-PrOH = 90/10, flow = 0.8 mL/min, retention time 14.9 min (major) and 17.8 min. The HRMS Calculated for C<sub>16</sub>H<sub>19</sub>O<sub>4</sub> [M+H]<sup>+</sup> 275.1278, found: 275.1279.

---

## 4.2 Pd-catalyzed Hydrogenative Kinetic Resolution of Lactones with Quaternary Centers

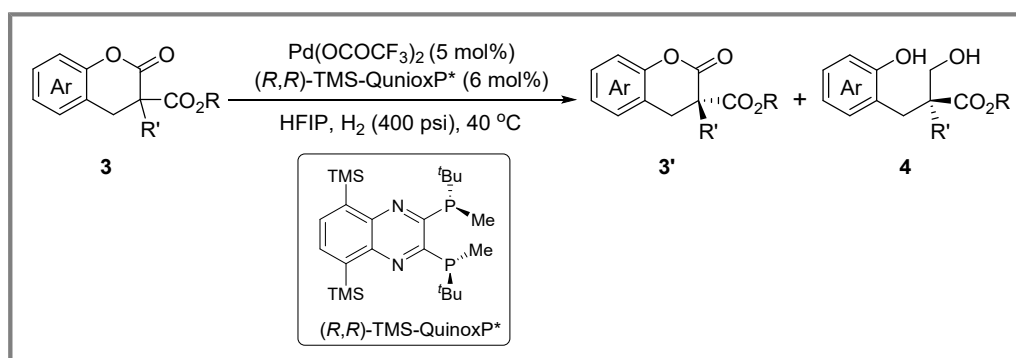

**General Procedure:** The Pd(OCOCF<sub>3</sub>)<sub>2</sub> (0.015 mmol, 4.8 mg, 5 mol%), ligand (*R,R*)-TMS-QuinoxP\* (0.018 mmol, 8.6 mg, 6 mol%) and degassed anhydrous acetone (1.0 mL) were placed in a dried Schlenk tube under nitrogen atmosphere. The mixture was stirred under room temperature for 1 hour, the solvent was removed under vacuum to give the catalyst. Then, this catalyst was taken into a glove box filled with nitrogen gas and dissolved in 1,1,1,3,3,3-hexafluoro-2-propanol (HFIP, 1.0 mL). To the lactones **3** (0.3 mmol) added this catalyst solution, and then the mixture was transferred to an autoclave, which was charged hydrogen gas (400 psi). The reaction mixture was stirred at 40 °C for 55-120 hours. After cooling to room temperature and the release of the hydrogen gas, the autoclave was opened. To the mixture added sodium cyanoborohydride (7.5 mg, 0.12 mmol). The mixture was stirred under room temperature for 2 hours, then the volatiles were removed under the reduced pressure. The crude residue was purified by column chromatography on silica gel using hexanes/ethyl acetate (10:1-5:1) as eluent to give the chiral reductive products **3'** and **4**.

The racemates were prepared by reduction of lactones **3** with sodium borohydride in methanol.

### (+)-Ethyl 2-benzyl-3-hydroxy-2-(2-hydroxybenzyl)propanoate (**4a**):

React for 55 h. 48 mg, 52% yield, colorless oil, new compound, *R<sub>f</sub>* = 0.40 (hexanes/ethyl acetate 5/1), 70.8% ee, [ $\alpha$ ]<sub>D</sub><sup>20</sup> = +4.90 (*c* 0.96, CHCl<sub>3</sub>). <sup>1</sup>H NMR (400 MHz, CDCl<sub>3</sub>)  $\delta$  7.26-7.02 (m, 7H), 7.01-6.80 (m, 2H), 4.27-4.06 (m, 2H), 3.71 (d, *J* = 11.7 Hz, 1H), 3.39 (d, *J* = 11.7 Hz, 1H), 3.26-3.17 (m, 2H), 3.01 (d, *J* = 14.1 Hz, 1H), 2.86 (d, *J* = 13.5 Hz, 1H), 1.27 (t, *J* = 7.2 Hz, 3H). <sup>13</sup>C NMR (100 MHz, CDCl<sub>3</sub>)  $\delta$  175.2, 155.6, 136.6, 132.5, 129.8, 128.7, 128.4, 126.9, 122.5, 120.5, 117.2, 61.7, 61.1, 53.6, 40.7, 34.7, 14.1. HPLC: Chiral-pak IB column, 230 nm, 30 °C, *n*-Hexane/*i*-PrOH = 95/5, flow = 0.8 mL/min, retention time 9.6 min and 10.3 min (major). HRMS Calculated for C<sub>19</sub>H<sub>22</sub>O<sub>4</sub>Na [M+H]<sup>+</sup> 337.1410, found: 337.1416.

### (+)-Ethyl (*S*)-3-benzyl-2-oxochromane-3-carboxylate (**3a'**):

Kinetic resolution from hydrogenation of **3a**. 44 mg, 47% yield, 93.0% ee, [ $\alpha$ ]<sub>D</sub><sup>20</sup> = +34.18 (*c* 0.88, CHCl<sub>3</sub>). HPLC: Chiralpak AS-H column, 230 nm, 30 °C, *n*-Hexane/*i*-PrOH = 90/10, flow = 0.8 mL/min, retention time 9.5 min (major) and 10.7 min.

### (+)-Ethyl 3-hydroxy-2-(2-hydroxybenzyl)-2-(4-methylbenzyl)propanoate (**4b**):

React for 55 h. 52 mg, 54% yield, colorless oil, new compound, *R<sub>f</sub>* = 0.37 (hexanes/ethyl acetate

5/1), 61.6% ee,  $[\alpha]^{20}_D = +7.31$  (*c* 1.04, CHCl<sub>3</sub>). <sup>1</sup>H NMR (400 MHz, CDCl<sub>3</sub>) δ 8.20 (brs, 1H), 7.19-7.11 (m, 2H), 7.05 (d, *J* = 7.8 Hz, 2H), 6.97 (d, *J* = 7.9 Hz, 2H), 6.93-6.82 (m, 2H), 4.25-4.09 (m, 2H), 3.69 (d, *J* = 11.3 Hz, 1H), 3.40 (d, *J* = 11.7 Hz, 2H), 3.25-3.14 (m, 2H), 3.02 (d, *J* = 14.1 Hz, 1H), 2.85 (d, *J* = 13.5 Hz, 1H), 2.30 (s, 3H), 1.28 (t, *J* = 7.2 Hz, 3H). <sup>13</sup>C NMR (100 MHz, CDCl<sub>3</sub>) δ 175.4, 155.7, 136.4, 133.4, 132.5, 129.6, 129.1, 128.7, 122.5, 120.4, 117.3, 61.9, 61.1, 53.5, 40.2, 34.7, 21.1, 14.2. HPLC: Chiralpak IB column, 230 nm, 30 °C, *n*-Hexane/*i*-PrOH = 95/5, flow = 0.8 mL/min, retention time 9.1 min and 10.3 min (major). HRMS Calculated for C<sub>20</sub>H<sub>25</sub>O<sub>4</sub> [M+H]<sup>+</sup> 329.1747, found: 329.1755.

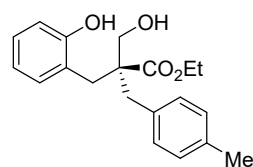

**(+)-Ethyl 3-(4-methylbenzyl)-2-oxochromane-3-carboxylate (3b')**:

Kinetic resolution from hydrogenation of **3b**. 43 mg, 44% yield, 84.1% ee,  $[\alpha]^{20}_D = +35.11$  (*c* 0.86, CHCl<sub>3</sub>). HPLC: Chiralpak AS-H column, 230 nm, 30 °C, *n*-Hexane/*i*-PrOH = 90/10, flow = 0.8 mL/min, retention time 8.0 min (major) and 9.1 min.

**(+)-Ethyl 2-(4-fluorobenzyl)-3-hydroxy-2-(2-hydroxybenzyl)propanoate (4c):**

React for 72 h. 61 mg, 61% yield, colorless oil, new compound, *R<sub>f</sub>* = 0.30 (hexanes/ethyl acetate 5/1), 60.1% ee,  $[\alpha]^{20}_D = +5.66$  (*c* 1.22, CHCl<sub>3</sub>). <sup>1</sup>H NMR (400 MHz, CDCl<sub>3</sub>) δ 8.41 (brs, 1H), 7.19-7.05 (m, 4H), 6.97-6.77 (m, 4H), 4.27-3.82 (m, 3H), 3.63 (d, *J* = 11.8 Hz, 1H), 3.44 (d, *J* = 11.7 Hz, 1H), 3.21-2.91 (m, 4H), 1.23 (t, *J* = 7.2 Hz, 3H). <sup>13</sup>C NMR (100 MHz, CDCl<sub>3</sub>) δ 174.8, 161.8 (d, <sup>1</sup>*J<sub>F-C</sub>* = 245.0 Hz), 155.2, 132.4 (d, <sup>4</sup>*J<sub>F-C</sub>* = 3.0 Hz), 132.3, 131.3 (d, <sup>3</sup>*J<sub>F-C</sub>* = 7.8 Hz), 128.7, 122.8, 120.7, 116.7, 115.2 (d, <sup>2</sup>*J<sub>F-C</sub>* = 21.1 Hz), 61.0, 60.9, 53.8, 39.9, 34.6, 14.1. <sup>19</sup>F NMR (376 MHz, CDCl<sub>3</sub>) δ -115.88. HPLC: Chiralpak IB column, 230 nm, 30 °C, *n*-Hexane/*i*-PrOH = 95/5, flow = 0.8 mL/min, retention time 10.2 min and 10.7 min (major). HRMS Calculated for C<sub>19</sub>H<sub>22</sub>FO<sub>4</sub> [M+H]<sup>+</sup> 333.1497, found: 333.1498.

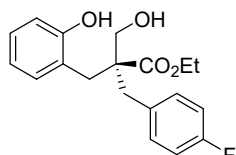

**(+)-Ethyl 3-(4-fluorobenzyl)-2-oxochromane-3-carboxylate (3c')**:

Kinetic resolution from hydrogenation of **3c**. 37 mg, 38% yield, 98.3% ee,  $[\alpha]^{20}_D = +33.17$  (*c* 0.74, CHCl<sub>3</sub>). HPLC: Chiralpak AS-H column, 230 nm, 30 °C, *n*-Hexane/*i*-PrOH = 90/10, flow = 0.8 mL/min, retention time 9.3 min (major) and 11.2 min.

**(+)-Ethyl 3-hydroxy-2-(2-hydroxybenzyl)-2-(naphthalen-2-ylmethyl)propanoate (4d):**

React for 120 h. 49 mg, 45% yield, colorless oil, new compound, *R<sub>f</sub>* = 0.30 (hexanes/ethyl acetate 5/1), 67.1% ee,  $[\alpha]^{20}_D = +3.74$  (*c* 0.98, CHCl<sub>3</sub>). <sup>1</sup>H NMR (400 MHz, CDCl<sub>3</sub>) δ 8.33 (brs, 1H), 7.79-7.66 (m, 3H), 7.56 (s, 1H), 7.46-7.37 (m, 2H), 7.22 (d, *J* = 7.7 Hz, 1H), 7.17-7.08 (m, 2H), 6.95-6.80 (m, 2H), 4.14 (q, *J* = 7.1 Hz, 2H), 3.68 (d, *J* = 11.7 Hz, 2H), 3.48 (d, *J* = 11.7 Hz, 1H), 3.34 (d, *J* = 13.4 Hz, 1H), 3.24 (d, *J* = 14.1 Hz, 1H), 3.16-3.02 (m, 2H), 1.21 (t, *J* = 7.1 Hz, 3H). <sup>13</sup>C NMR (100 MHz, CDCl<sub>3</sub>) δ 175.2, 155.5, 134.3, 133.4, 132.5, 132.4, 128.7, 128.6, 128.1, 127.9, 127.62, 127.59, 126.1, 125.7, 122.7, 120.6, 117.0, 61.5, 61.1, 53.9, 40.8, 34.8, 14.2. HPLC: Chiralpak IA column, 230 nm, 30 °C, *n*-Hexane/*i*-PrOH = 95/5, flow = 0.8 mL/min, retention time 18.7 min (minor) and 26.5 min (major). HRMS Calculated for C<sub>23</sub>H<sub>25</sub>O<sub>4</sub> [M+H]<sup>+</sup> 365.1747, found: 365.1750.

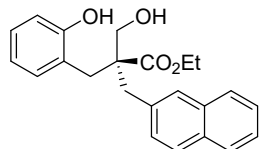

---

**(+)-Ethyl 3-(naphthalen-2-ylmethyl)-2-oxochromane-3-carboxylate (3d')**

Kinetic resolution from hydrogenation of **3d**. 60 mg, 55% yield, 59.7% ee,  $[\alpha]^{20}_D = +14.32$  (*c* 1.20, CHCl<sub>3</sub>). HPLC: Chiralpak AS-H column, 230 nm, 30 °C, *n*-Hexane/*i*-PrOH = 90/10, flow = 0.8 mL/min, retention time 11.4 min (major) and 13.5 min.

---

**(+)-Ethyl 3-hydroxy-2-(2-hydroxybenzyl)-2-methylpropanoate (4e):**

React for 72 h. 45 mg, 64% yield, colorless oil, new compound,  $R_f = 0.34$  (hexanes/ethyl acetate 5/1), 53.8% ee,  $[\alpha]^{20}_D = +6.88$  (*c* 0.90, CHCl<sub>3</sub>). <sup>1</sup>H NMR (400 MHz, CDCl<sub>3</sub>)  $\delta$  8.20 (brs, 1H), 7.23-7.09 (m, 1H), 7.05 (d, *J* = 6.5 Hz, 1H), 6.93-6.67 (m, 2H), 4.22 (q, *J* = 7.1 Hz, 2H), 3.78 (d, *J* = 11.7 Hz, 1H), 3.31-3.08 (m, 2H), 2.79 (d, *J* = 14.1 Hz, 1H), 1.30 (t, *J* = 7.1 Hz, 3H), 1.14 (s, 3H). <sup>13</sup>C NMR (100 MHz, CDCl<sub>3</sub>)  $\delta$  177.6, 155.8, 132.9, 128.6, 122.2, 120.2, 117.2, 65.6, 61.3, 48.0, 34.0, 19.3, 14.2. HPLC: Chiralpak IB column, 230 nm, 30 °C, *n*-Hexane/*i*-PrOH = 95/5, flow = 0.8 mL/min, retention time 12.3 min and 13.9 min (major). HRMS Calculated for C<sub>13</sub>H<sub>19</sub>O<sub>4</sub> [M+H]<sup>+</sup> 239.1278, found: 239.1271.

---

**(+)-Ethyl 3-methyl-2-oxochromane-3-carboxylate (3e')**

Kinetic resolution from hydrogenation of **3e**. 25 mg, 35% yield, 98.4% ee,  $[\alpha]^{20}_D = +11.34$  (*c* 0.50, CHCl<sub>3</sub>). HPLC: Chiralpak AS-H column, 230 nm, 30 °C, *n*-Hexane/*i*-PrOH = 90/10, flow = 0.8 mL/min, retention time 9.8 min (major) and 11.0 min.

---

**(+)-Ethyl 2-(2-hydroxy-5-methylbenzyl)-2-(hydroxymethyl)butanoate (4f):**

React for 60 h. 36 mg, 49% yield, colorless oil, new compound,  $R_f = 0.38$  (hexanes/ethyl acetate 5/1), 80.5% ee,  $[\alpha]^{20}_D = +7.71$  (*c* 0.72, CHCl<sub>3</sub>). <sup>1</sup>H NMR (400 MHz, CDCl<sub>3</sub>)  $\delta$  8.33 (brs, 1H), 7.18-7.10 (m, 1H), 7.08-7.00 (m, 1H), 6.93-6.79 (m, 2H), 4.23 (q, *J* = 7.1 Hz, 2H), 3.86 (d, *J* = 11.6 Hz, 2H), 3.32 (d, *J* = 11.6 Hz, 1H), 3.18 (d, *J* = 14.2 Hz, 1H), 2.85 (d, *J* = 14.2 Hz, 1H), 1.80-1.67 (m, 1H), 1.60-1.49 (m, 1H), 1.30 (t, *J* = 7.1 Hz, 3H), 0.87 (t, *J* = 7.5 Hz, 3H). <sup>13</sup>C NMR (100 MHz, CDCl<sub>3</sub>)  $\delta$  176.3, 155.6, 132.5, 128.5, 122.6, 120.3, 117.0, 63.1, 61.1, 52.7, 33.0, 26.6, 14.3, 8.9. The HPLC: Chiralpak IB column, 230 nm, 30 °C, *n*-Hexane/*i*-PrOH = 90/10, flow = 0.8 mL/min, retention time 9.8 min and 11.2 min (major). HRMS Calculated for C<sub>14</sub>H<sub>20</sub>O<sub>4</sub>Na [M+Na]<sup>+</sup> 275.1254, found: 275.1253.

---

**(+)-Ethyl 3-ethyl-6-methyl-2-oxochromane-3-carboxylate (3f')**

Kinetic resolution from hydrogenation of substrate lactone **3f**. 35 mg, 47% yield, 88.6% ee,  $[\alpha]^{20}_D = +14.91$  (*c* 0.70, CHCl<sub>3</sub>). The HPLC: Chiralpak AS-H column, 230 nm, 30 °C, *n*-Hexane/*i*-PrOH = 90/10, flow = 0.8 mL/min, retention time 7.9 min (major) and 9.7 min (minor).

---

**(+)-Ethyl 2-(2-hydroxybenzyl)-2-(hydroxymethyl)pentanoate (4g):**

React for 72 h. 47 mg, 57% yield, colorless oil, new compound,  $R_f = 0.40$  (hexanes/ethyl acetate 5/1), 75.0% ee,  $[\alpha]^{20}_D = +10.32$  (*c* 0.94, CHCl<sub>3</sub>). <sup>1</sup>H NMR (400 MHz, CDCl<sub>3</sub>)  $\delta$  8.30 (brs, 1H), 7.19-7.09 (m, 1H), 7.08-6.99 (m, 1H), 6.94-6.74 (m, 2H), 4.31-4.15 (m, 2H), 3.82 (t, *J* = 29.3 Hz, 2H), 3.30 (d, *J* = 11.7 Hz, 1H), 3.18 (d, *J* = 14.2 Hz, 1H), 2.84 (d, *J* = 14.2 Hz, 1H), 1.74-1.64 (m, 1H),

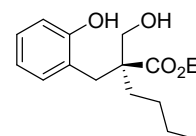

1.53-1.43 (m, 1H), 1.33-1.18 (m, 7H), 0.89 (t,  $J = 7.2$  Hz, 3H).  $^{13}\text{C}$  NMR (100 MHz,  $\text{CDCl}_3$ )  $\delta$  176.5, 155.7, 132.6, 128.5, 122.6, 120.2, 117.1, 63.5, 61.0, 52.2, 33.5, 33.3, 26.7, 23.2, 14.3, 13.9. HPLC: Chiralpak IB column, 230 nm, 30 °C, *n*-Hexane/*i*-PrOH = 95/5, flow = 0.8 mL/min, retention time 8.9 min and 9.4 min (major). HRMS Calculated for  $\text{C}_{16}\text{H}_{24}\text{O}_4\text{Na}$   $[\text{M}+\text{Na}]^+$  303.1567, found: 303.1572.

---

**(+)-Ethyl 2-oxo-3-propylchromane-3-carboxylate (3g')**:

Kinetic resolution from hydrogenation of **3g**. 36 mg, 43% yield, 99.0% ee,  $[\alpha]_{\text{D}}^{20} = +15.97$  ( $c$  0.72,  $\text{CHCl}_3$ ). HPLC: Chiralpak AS-H column, 230 nm, 30 °C, *n*-Hexane/*i*-PrOH = 90/10, flow = 0.8 mL/min, retention time 7.1 min (major) and 8.6 min.

---

**(+)-Ethyl 2-(2-hydroxybenzyl)-2-(hydroxymethyl)-4-methoxybutanoate (4h)**:

React for 66 h. 39 mg, 46% yield, colorless oil, new compound,  $R_f = 0.20$  (hexanes/ethyl acetate 5/1), 84.4% ee,  $[\alpha]_{\text{D}}^{20} = +20.99$  ( $c$  0.78,  $\text{CHCl}_3$ ).  $^1\text{H}$  NMR (400 MHz,  $\text{CDCl}_3$ )  $\delta$  7.16-7.09 (m, 1H), 7.05-6.97 (m, 1H), 6.89 (d,  $J = 7.9$  Hz, 1H), 6.84-6.74 (m, 1H), 4.16 (q,  $J = 7.1$  Hz, 2H), 3.77 (d,  $J = 12.1$  Hz, 1H), 3.59-3.37 (m, 3H), 3.33 (s, 3H), 2.99 (dd,  $J = 35.6, 14.1$  Hz, 2H), 2.19-2.07 (m, 1H), 1.94-1.85 (m, 1H), 1.25 (t,  $J = 7.1$  Hz, 3H).  $^{13}\text{C}$  NMR (100 MHz,  $\text{CDCl}_3$ )  $\delta$  175.6, 155.9, 132.2, 128.6, 122.5, 120.2, 117.3, 69.0, 62.8, 61.1, 58.8, 51.4, 34.6, 33.9, 14.1. HPLC: Chiralpak IB column, 230 nm, 30 °C, *n*-Hexane/*i*-PrOH = 95/5, flow = 0.8 mL/min, retention time 14.1 min and 17.5 min (major). HRMS Calculated for  $\text{C}_{15}\text{H}_{22}\text{O}_5\text{Na}$   $[\text{M}+\text{Na}]^+$  303.1359, found: 303.1364.

---

**(+)-Ethyl 3-(2-methoxyethyl)-2-oxochromane-3-carboxylate (3h')**:

Kinetic resolution from hydrogenation of **3h**. 44 mg, 53% yield, 66.4% ee,  $[\alpha]_{\text{D}}^{20} = +17.33$  ( $c$  0.88,  $\text{CHCl}_3$ ). HPLC: Chiralpak AS-H column, 230 nm, 30 °C, *n*-Hexane/*i*-PrOH = 90/10, flow = 0.8 mL/min, retention time 9.2 min (major) and 10.1 min.

---

**(+)-Ethyl 3-cyclopropyl-2-(2-hydroxybenzyl)-2-(hydroxymethyl)propanoate (4i)**:

React for 72 h. 56 mg, 68% yield, colorless oil, new compound,  $R_f = 0.30$  (hexanes/ethyl acetate 5/1), 39.8% ee,  $[\alpha]_{\text{D}}^{20} = +9.10$  ( $c$  1.12,  $\text{CHCl}_3$ ).  $^1\text{H}$  NMR (400 MHz,  $\text{CDCl}_3$ )  $\delta$  8.30 (brs, 1H), 7.20-7.11 (m, 1H), 7.07-6.95 (m, 1H), 6.95-6.74 (m, 2H), 4.33-4.16 (m, 2H), 4.09 (d,  $J = 11.7$  Hz, 1H), 3.39 (d,  $J = 11.7$  Hz, 2H), 3.18 (d,  $J = 14.2$  Hz, 1H), 2.83 (d,  $J = 14.2$  Hz, 1H), 1.90-1.80 (m, 1H), 1.33 (t,  $J = 7.1$  Hz, 3H), 0.65-0.51 (m, 1H), 0.49-0.36 (m, 2H), 0.08-0.03 (m, 2H).  $^{13}\text{C}$  NMR (100 MHz,  $\text{CDCl}_3$ )  $\delta$  176.7, 155.9, 132.6, 128.6, 122.3, 120.2, 117.4, 63.4, 61.1, 52.8, 39.0, 34.0, 14.2, 6.5, 5.3, 4.1. HPLC: Chiralpak IB column, 230 nm, 30 °C, *n*-Hexane/*i*-PrOH = 95/5, flow = 0.8 mL/min, retention time 9.9 min and 11.4 min (major). HRMS Calculated for  $\text{C}_{16}\text{H}_{23}\text{O}_4$   $[\text{M}+\text{H}]^+$  279.1591, found: 279.1597.

---

**(+)-Ethyl 3-(cyclopropylmethyl)-2-oxochromane-3-carboxylate (3i')**:

Kinetic resolution from hydrogenation of **3i**. 26 mg, 32% yield, 98.8% ee,  $[\alpha]_{\text{D}}^{20} = +32.66$  ( $c$  0.52,  $\text{CHCl}_3$ ). HPLC: Chiralpak AS-H column, 230 nm, 30 °C, *n*-Hexane/*i*-PrOH = 90/10, flow = 0.8 mL/min, retention time 7.6 min (major) and 9.6 min.

---

**(+)-Ethyl 3-cyclobutyl-2-(2-hydroxybenzyl)-2-(hydroxymethyl)propanoate (4j):**

React for 55 h under 50 °C. 58 mg, 67% yield, colorless oil, new compound,  $R_f = 0.25$  (hexanes/ethyl acetate 5/1), 48.0% ee,  $[\alpha]_D^{20} = +2.33$  ( $c$  1.16,  $\text{CHCl}_3$ ).  $^1\text{H NMR}$  (400 MHz,  $\text{CDCl}_3$ )  $\delta$  8.44 (brs, 1H), 7.17-7.10 (m, 1H), 7.08-6.98 (m, 1H), 6.91-6.73 (m, 2H), 4.24-4.12 (m, 2H), 3.82 (d,  $J = 11.7$  Hz, 2H), 3.29 (d,  $J = 11.7$  Hz, 1H), 3.13 (d,  $J = 14.1$  Hz, 1H), 2.83 (d,  $J = 14.2$  Hz, 1H), 2.37-2.26 (m, 1H), 2.02-1.92 (m, 2H), 1.89-1.76 (m, 2H), 1.74-1.54 (m, 4H), 1.30 (t,  $J = 7.1$  Hz, 3H).  $^{13}\text{C NMR}$  (100 MHz,  $\text{CDCl}_3$ )  $\delta$  176.4, 155.7, 132.6, 128.5, 122.6, 120.3, 117.0, 63.1, 61.0, 51.9, 41.2, 33.7, 32.5, 30.1, 29.2, 18.8, 14.2. HPLC: Chiralpak IB column, 230 nm, 30 °C,  $n$ -Hexane/ $i$ -PrOH = 95/5, flow = 0.8 mL/min, retention time 9.1 min and 9.9 min (major). HRMS Calculated for  $\text{C}_{17}\text{H}_{24}\text{O}_4\text{Na}$   $[\text{M}+\text{Na}]^+$  315.1567, found: 315.1567.

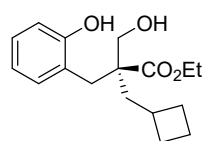

---

**(+)-Ethyl 3-(cyclobutylmethyl)-2-oxochromane-3-carboxylate (3j')**

Kinetic resolution from hydrogenation of **3j**. 28 mg, 33% yield, 95.6% ee,  $[\alpha]_D^{20} = +24.69$  ( $c$  0.56,  $\text{CHCl}_3$ ). HPLC: Chiralpak AS-H column, 230 nm, 30 °C,  $n$ -Hexane/ $i$ -PrOH = 90/10, flow = 0.8 mL/min, retention time 7.6 min (major) and 8.9 min.

---

**(+)-Ethyl 3-cyclohexyl-2-(2-hydroxybenzyl)-2-(hydroxymethyl)propanoate (4k):**

React for 72 h. 62 mg, 64% yield, colorless oil, new compound,  $R_f = 0.30$  (hexanes/ethyl acetate 5/1), 55.0% ee,  $[\alpha]_D^{20} = +6.51$  ( $c$  1.04,  $\text{CHCl}_3$ ).  $^1\text{H NMR}$  (400 MHz,  $\text{CDCl}_3$ )  $\delta$  8.27 (brs, 1H), 7.20-7.10 (m, 1H), 7.07-7.00 (m, 1H), 6.98-6.87 (m, 1H), 6.86-6.76 (m, 1H), 4.22 (q,  $J = 7.1$  Hz, 2H), 3.96 (d,  $J = 11.7$  Hz, 1H), 3.44 (brs, 1H), 3.26 (d,  $J = 11.9$  Hz, 1H), 3.16 (d,  $J = 14.1$  Hz, 1H), 2.75 (d,  $J = 14.1$  Hz, 1H), 1.79-1.70 (m, 1H), 1.67-1.59 (m, 4H), 1.52 (d,  $J = 13.2$  Hz, 1H), 1.47-1.40 (m, 1H), 1.32 (t,  $J = 7.1$  Hz, 3H), 1.25-1.08 (m, 4H), 0.98-0.85 (m, 2H).  $^{13}\text{C NMR}$  (100 MHz,  $\text{CDCl}_3$ )  $\delta$  177.2, 155.8, 132.7, 128.5, 122.5, 120.2, 117.2, 63.2, 61.0, 51.4, 41.3, 34.9, 34.7, 34.1, 33.7, 26.4, 26.3, 26.1, 14.1. HPLC: Chiralpak AS-H column, 230 nm, 30 °C,  $n$ -Hexane/ $i$ -PrOH = 90/10, flow = 0.8 mL/min, retention time 6.2 min (major) and 7.2 min. HRMS Calculated for  $\text{C}_{19}\text{H}_{28}\text{O}_4\text{Na}$   $[\text{M}+\text{Na}]^+$  339.1567, found: 339.1534.

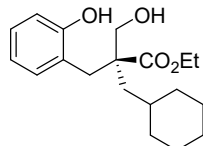

---

**(+)-Ethyl 3-(cyclohexylmethyl)-2-oxochromane-3-carboxylate (3k')**

Kinetic resolution from hydrogenation of **3k**. 34 mg, 36% yield, 97.0% ee,  $[\alpha]_D^{20} = +14.87$  ( $c$  0.68,  $\text{CHCl}_3$ ). HPLC: Chiralcel OD-H column, 230 nm, 30 °C,  $n$ -Hexane/ $i$ -PrOH = 90/10, flow = 0.8 mL/min, retention time 5.6 min (major) and 6.2 min.

---

**(+)-Methyl 2-benzyl-3-hydroxy-2-(2-hydroxybenzyl)propanoate (4l):**

React for 50 h. 46 mg, 51% yield, colorless oil, new compound,  $R_f = 0.35$  (hexanes/ethyl acetate 5/1), 77.4% ee,  $[\alpha]_D^{20} = +13.75$  ( $c$  0.64,  $\text{CHCl}_3$ ).  $^1\text{H NMR}$  (400 MHz,  $\text{CDCl}_3$ )  $\delta$  8.08 (brs, 1H), 7.27-7.04 (m, 7H), 6.93-6.81 (m, 2H), 3.69 (s, 3H), 3.68-3.28 (m, 3H), 3.27-3.14 (m, 2H), 3.04 (d,  $J = 14.1$  Hz, 1H), 2.90 (d,  $J = 13.5$  Hz, 1H).  $^{13}\text{C NMR}$  (100 MHz,  $\text{CDCl}_3$ )  $\delta$  175.6, 155.6, 136.6, 132.4, 129.7, 128.7, 128.5, 126.9, 122.4, 120.5, 117.2, 61.6, 53.8, 51.8, 40.7, 34.7. HPLC: Chiralpak IB column, 230 nm, 30 °C,  $n$ -

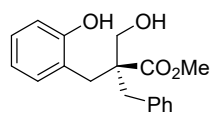

Hexane/*i*-PrOH = 97/3, flow = 1.0 mL/min, retention time 13.8 min and 15.0 min (major). HRMS Calculated for C<sub>18</sub>H<sub>20</sub>O<sub>4</sub>Na [M+Na]<sup>+</sup> 323.1254, found: 323.1268.

---

**(+)-Methyl 3-benzyl-2-oxochromane-3-carboxylate (3l')**:

Kinetic resolution from hydrogenation of **3l**. 45 mg, 48% yield, 72.0% ee, [α]<sup>20</sup><sub>D</sub> = +32.00 (*c* 0.60, CHCl<sub>3</sub>). HPLC: Chiralpak AS-H column, 230 nm, 30 °C, *n*-Hexane/*i*-PrOH = 90/10, flow = 0.8 mL/min, retention time 12.0 min and 23.5 min (major).

---

**(+)-Isopropyl 2-benzyl-3-hydroxy-2-(2-hydroxybenzyl)propanoate (4m):**

React for 72 h. 52 mg, 53% yield, colorless oil, new compound, R<sub>f</sub> = 0.35 (hexanes/ethyl acetate 5/1), 71.2% ee, [α]<sup>20</sup><sub>D</sub> = +7.61 (*c* 1.04, CHCl<sub>3</sub>). <sup>1</sup>H NMR (400 MHz, CDCl<sub>3</sub>) δ 8.41 (brs, 1H), 7.26-7.07 (m, 7H), 6.94-6.80 (m, 2H), 5.09-4.89 (m, 1H), 3.70 (t, *J* = 36.4 Hz, 2H), 3.41 (d, *J* = 11.7 Hz, 1H), 3.25-3.11 (m, 2H), 3.03 (d, *J* = 14.1 Hz, 1H), 2.91 (d, *J* = 13.5 Hz, 1H), 1.24-1.05 (m, 6H). <sup>13</sup>C NMR (100 MHz, CDCl<sub>3</sub>) δ 174.8, 155.5, 136.7, 132.6, 130.0, 128.7, 128.3, 126.8, 122.7, 120.4, 117.1, 69.0, 61.5, 53.5, 40.6, 34.8, 21.81, 21.75. HPLC: Chiralpak IB column, 230 nm, 30 °C, *n*-Hexane/*i*-PrOH = 95/5, flow = 0.8 mL/min, retention time 8.6 min and 9.6 min (major). HRMS Calculated for C<sub>20</sub>H<sub>24</sub>O<sub>4</sub>Na [M+Na]<sup>+</sup> 351.1567, found: 351.1574.

---

**(+)-Isopropyl 3-benzyl-2-oxochromane-3-carboxylate (3m')**:

Kinetic resolution from hydrogenation of **3l**. 45 mg, 46% yield, 80.8% ee, [α]<sup>20</sup><sub>D</sub> = +7.62 (*c* 0.90, CHCl<sub>3</sub>). HPLC: Chiralpak AS-H column, 230 nm, 30 °C, *n*-Hexane/*i*-PrOH = 90/10, flow = 0.8 mL/min, retention time 7.6 min (major) and 8.1 min.

---

**(+)-Ethyl 2-benzyl-3-hydroxy-2-(2-hydroxy-4-methylbenzyl)propanoate (4n):**

React for 56 h. 50 mg, 50% yield, colorless oil, new compound, R<sub>f</sub> = 0.40 (hexanes/ethyl acetate 5/1), 78.1% ee, [α]<sup>20</sup><sub>D</sub> = +9.79 (*c* 1.00, CHCl<sub>3</sub>). <sup>1</sup>H NMR (400 MHz, CDCl<sub>3</sub>) δ 8.05 (brs, 1H), 7.26-7.18 (m, 3H), 7.12-6.96 (m, 3H), 6.82-6.58 (m, 2H), 4.24-4.08 (m, 2H), 3.68 (d, *J* = 11.5 Hz, 1H), 3.39 (d, *J* = 11.8 Hz, 1H), 3.18 (d, *J* = 13.8 Hz, 2H), 3.01-2.82 (m, 2H), 2.27 (s, 3H), 1.25 (t, *J* = 7.1 Hz, 3H). <sup>13</sup>C NMR (100 MHz, CDCl<sub>3</sub>) δ 175.4, 155.5, 138.7, 136.7, 132.3, 129.8, 128.4, 126.9, 121.3, 119.2, 117.8, 61.8, 61.0, 53.5, 40.6, 34.5, 21.1, 14.2. The HPLC: Chiralpak IA column, 230 nm, 30 °C, *n*-Hexane/*i*-PrOH = 95/5, flow = 0.8 mL/min, retention time 14.9 min and 18.1 min (major). HRMS Calculated for C<sub>20</sub>H<sub>24</sub>O<sub>4</sub>Na [M+Na]<sup>+</sup> 351.1567, found: 351.1568.

---

**(+)-Ethyl 3-benzyl-7-methyl-2-oxochromane-3-carboxylate (3n')**:

Kinetic resolution from hydrogenation of **3m**. 49 mg, 50% yield, 88.1% ee, [α]<sup>20</sup><sub>D</sub> = +29.00 (*c* 0.98, CHCl<sub>3</sub>). HPLC: Chiralpak IB column, 230 nm, 30 °C, *n*-Hexane/*i*-PrOH = 97/3, flow = 0.8 mL/min, retention time 9.0 min (major) and 10.6 min.

---

**(+)-Ethyl 2-benzyl-2-(4-chloro-2-hydroxybenzyl)-3-hydroxypropanoate (4o):**

React for 72 h. 51 mg, 50% yield, colorless oil, new compound, R<sub>f</sub> = 0.40 (hexanes/ethyl acetate 5/1), 59.3% ee, [α]<sup>20</sup><sub>D</sub> = +10.33 (*c* 1.02, CHCl<sub>3</sub>). <sup>1</sup>H NMR (400 MHz, CDCl<sub>3</sub>) δ 8.52 (brs, 1H),

7.26-7.18 (m, 3H), 7.13-7.00 (m, 3H), 6.91 (d,  $J = 2.1$  Hz, 1H), 6.86-6.77 (m, 1H), 4.18-4.09 (m, 2H), 3.64 (d,  $J = 11.7$  Hz, 1H), 3.41 (d,  $J = 11.7$  Hz, 1H), 3.16 (d,  $J = 13.5$  Hz, 2H), 2.98 (d,  $J = 14.2$  Hz, 1H), 2.87 (d,  $J = 13.5$  Hz, 1H), 1.23 (t,  $J = 7.2$  Hz, 3H).  $^{13}\text{C}$  NMR (100 MHz,  $\text{CDCl}_3$ )  $\delta$  175.0, 156.5, 136.4, 133.7, 133.2, 129.8, 128.4, 127.0, 121.2, 120.6, 117.5, 61.6, 61.2, 53.5, 40.7, 34.2, 14.1. HPLC: Chiralpak IB column, 230 nm, 30 °C, *n*-Hexane/*i*-PrOH = 95/5, flow = 0.8 mL/min, retention time 14.2 min (major) and 15.5 min. HRMS Calculated for  $\text{C}_{19}\text{H}_{21}\text{ClO}_4\text{Na}$   $[\text{M}+\text{Na}]^+$  371.1021 ( $^{35}\text{Cl}$ ), found: 371.1027 ( $^{35}\text{Cl}$ ).  $[\text{M}+\text{H}]^+$  373.1004 ( $^{37}\text{Cl}$ ), found: 373.1003 ( $^{37}\text{Cl}$ ).

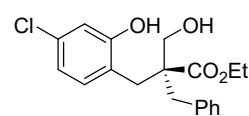

**(+)-Ethyl 3-benzyl-7-chloro-2-oxochromane-3-carboxylate (3o')**

Kinetic resolution from hydrogenation of **3n**. 51 mg, 49% yield, 82.1% ee,  $[\alpha]_{\text{D}}^{20} = +32.32$  (*c* 1.02,  $\text{CHCl}_3$ ). HPLC: Chiralpak AS-H column, 230 nm, 30 °C, *n*-Hexane/*i*-PrOH = 97/3, flow = 0.8 mL/min, retention time 9.3 min (major) and 10.0 min.

**(+)-Ethyl 2-benzyl-3-hydroxy-2-(2-hydroxy-4-methoxybenzyl)propanoate (4p)**

React for 72 h. 67 mg, 65% yield, colorless oil, new compound,  $R_f = 0.25$  (hexanes/ethyl acetate 5/1), 49.5% ee,  $[\alpha]_{\text{D}}^{20} = +14.74$  (*c* 1.34,  $\text{CHCl}_3$ ).  $^1\text{H}$  NMR (400 MHz,  $\text{CDCl}_3$ )  $\delta$  8.47 (brs, 1H), 7.24-7.15 (m, 3H), 7.12-7.05 (m, 2H), 7.00 (d,  $J = 8.4$  Hz, 1H), 6.53-6.36 (m, 2H), 4.18-4.06 (m, 2H), 3.72 (d,  $J = 2.2$  Hz, 3H), 3.65 (d,  $J = 11.6$  Hz, 1H), 3.42 (d,  $J = 11.6$  Hz, 1H), 3.20-3.09 (m, 2H), 3.01-2.84 (m, 2H), 1.22 (t,  $J = 7.2$  Hz, 3H).  $^{13}\text{C}$  NMR (100 MHz,  $\text{CDCl}_3$ )  $\delta$  175.3, 160.0, 156.5, 136.8, 132.9, 129.8, 128.4, 126.8, 114.8, 106.7, 102.4, 61.5, 61.0, 55.3, 53.7, 40.7, 34.1, 14.1. HPLC: Chiralpak IC column, 230 nm, 30 °C, *n*-Hexane/*i*-PrOH = 80/20, flow = 0.8 mL/min, retention time 9.0 min (major) and 11.3 min. HRMS Calculated for  $\text{C}_{20}\text{H}_{25}\text{O}_5$   $[\text{M}+\text{H}]^+$  345.1697, found: 345.1697.

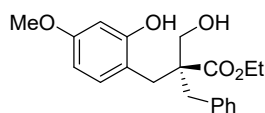

**(+)-Ethyl 3-benzyl-7-methoxy-2-oxochromane-3-carboxylate (3p')**

Kinetic resolution from hydrogenation of **3o**. 36 mg, 35% yield, 97.9% ee,  $[\alpha]_{\text{D}}^{20} = +42.97$  (*c* 0.72,  $\text{CHCl}_3$ ). HPLC: Chiralcel OD-H column, 230 nm, 30 °C, *n*-Hexane/*i*-PrOH = 90/10, flow = 0.8 mL/min, retention time 9.6 min (major) and 10.8 min.



## 5. Experiment at Gram Scale

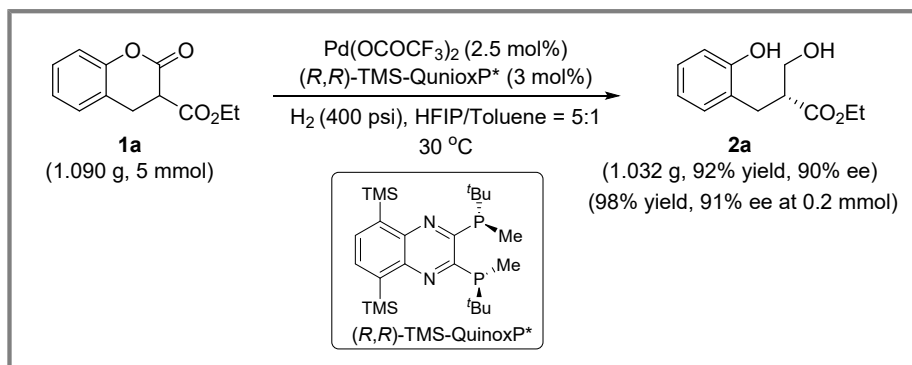

The metal precursor Pd(OCOCF<sub>3</sub>)<sub>2</sub> (0.125 mmol, 40.3 mg, 2.5 mol%), chiral ligand (*R,R*)-TMS-QuinoxP\* (0.15 mmol, 71.9 mg, 3 mol%) and degassed anhydrous acetone (10 mL) were placed in a dried Schlenk tube under nitrogen atmosphere. The mixture was stirred under room temperature for 2 hour. The solvent was removed under vacuum to give the chiral catalyst. This catalyst was taken into a glove box filled with nitrogen and dissolved in solvent (HFIP/toluene = 5:1, 6.0 mL). To the mixture of lactone **1a** (5 mmol, 1.090 g) and solvent (HFIP/toluene = 5:1, 6.0 mL) was added the above catalyst solution, and the mixture was transferred to an autoclave, which was charged hydrogen gas (400 psi). The reaction mixture was stirred at 30 °C for 120 hours. After the release of hydrogen gas, the autoclave was opened and the volatiles were removed under the reduced pressure. Then, the residue was purified by column chromatography on silica gel using using dichloromethane/methanol (40:1) as eluent to give the pure reductive product **2a** (1.032 g, 92% yield, 90% ee).

The enantiomeric excess of the reductive product **2a** was determined by the chiral HPLC with the Chiralpak AS-H column.

## 6. Product Elaboration

### 6.1 Transesterification

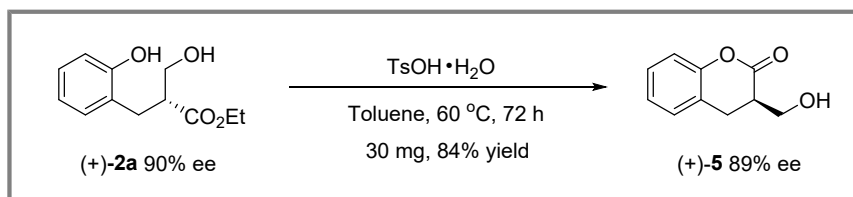

To a Schlenk tube, reductive product ethyl 3-hydroxy-2-(2-hydroxybenzyl)propanoate (+)-**2a** (90% ee, 44.8 mg, 0.2 mmol), toluene (4.0 mL) and *p*-toluenesulfonic acid monohydrate (3.8 mg, 0.02 mmol) were added under nitrogen gas. Then the mixture was stirred for 72 hours under 60 °C. After completion of reaction (monitored by TLC), water (10 mL) and ethyl acetate (5 mL) were added, and the water layer was extracted with ethyl acetate three times. The combined organic layers were dried over anhydrous sodium sulfate, filtered and concentrated under the reduced pressure. The crude residue was purified by flash column chromatography on silica gel using dichloromethane/methanol (40:1) as eluent to give the chiral transesterification product (-)-**5** without any loss of optical purity.

#### (-)-3-(Hydroxymethyl)chroman-2-one (**5**)

30 mg, 84% yield, viscous oil, new compound,  $R_f = 0.60$  (dichloromethane/methanol 40/1), 89% ee,  $[\alpha]_D^{20} = -14.09$  ( $c$  0.44, CHCl<sub>3</sub>). <sup>1</sup>H NMR (400 MHz, CDCl<sub>3</sub>)  $\delta$  7.28-7.20 (m, 2H), 7.17-7.02 (m, 2H), 4.17-3.84 (m, 2H), 3.04 (t,  $J = 14.3$  Hz, 1H), 2.97-2.79 (m, 2H), 2.63 (t,  $J = 6.5$  Hz, 1H). <sup>13</sup>C NMR (100 MHz, CDCl<sub>3</sub>)  $\delta$  171.0, 151.2, 128.4, 128.2, 124.7, 122.5, 116.8, 61.8, 41.6, 26.3. HPLC: Chiralpak AS-H column, 230 nm, 30 °C, *n*-Hexane/*i*-PrOH = 90/10, flow = 0.8 mL/min, retention time 31.1 min (major) and 32.8. HRMS Calculated for C<sub>10</sub>H<sub>11</sub>O<sub>3</sub> [M+H]<sup>+</sup> 179.0703, found: 179.0697.

### 6.2 Appel Reaction

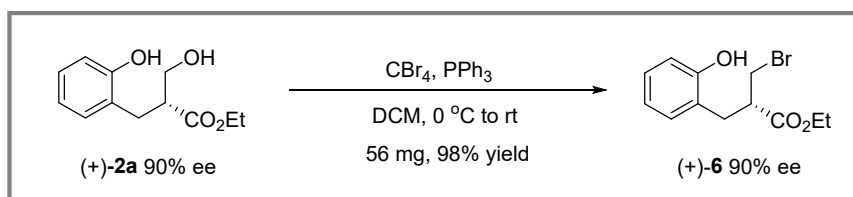

To a Schlenk tube, reductive product ethyl 3-hydroxy-2-(2-hydroxybenzyl)propanoate (+)-**2a** (90% ee, 44.8 mg, 0.2 mmol), dichloromethane (2.0 mL) and carbon tetrabromide (73.0 mg, 0.22 mmol) were added under nitrogen gas. Then triphenylphosphine (78.7 mg, 0.3 mmol) in dichloromethane (2.0 mL) was added dropwise at 0 °C. The mixture was allowed to reach room temperature and stirred for 72 hours. After completion of reaction (monitored by TLC), water (10 mL) and ethyl acetate (5 mL) were added, and the water layer was extracted with ethyl acetate three times. The combined organic layers were dried over anhydrous sodium sulfate, filtered and concentrated under the reduced pressure. The crude residue was purified by flash column chromatography on silica gel using hexanes/ethyl acetate (10/1) as eluent to give the chiral brominated product (-)-**6** without any loss of optical purity.

---

### (-)-Ethyl 3-bromo-2-(2-hydroxybenzyl)propanoate (6)

56 mg, 98% yield, viscous oil, new compound,  $R_f = 0.40$  (hexanes/ethyl acetate 10/1), 90% ee,  $[\alpha]_D^{20} = -1.52$  ( $c$  1.12,  $\text{CHCl}_3$ ).  $^1\text{H NMR}$  (400 MHz,  $\text{CDCl}_3$ )  $\delta$  7.17-7.07 (m, 2H), 6.93-6.71 (m, 2H), 6.21 (brs, 1H), 4.27-4.12 (m, 2H), 3.60 (d,  $J = 5.7$  Hz, 2H), 3.29-3.18 (m, 1H), 3.13 (dd,  $J = 13.8, 7.9$  Hz, 1H), 2.88 (dd,  $J = 13.8, 6.0$  Hz, 1H), 1.23 (t,  $J = 7.1$  Hz, 3H).  $^{13}\text{C NMR}$  (100 MHz,  $\text{CDCl}_3$ )  $\delta$  173.7, 154.1, 131.3, 128.4, 124.4, 120.9, 116.4, 61.6, 48.1, 33.0, 31.2, 14.1. The HPLC: Chiralcel OD-H column, 230 nm, 30 °C,  $n$ -Hexane/ $i$ -PrOH = 75/25, flow = 0.8 mL/min, retention time 9.9 min and 12.2 (major). HRMS Calculated for  $\text{C}_{12}\text{H}_{16}\text{BrO}_3$   $[\text{M}+\text{H}]^+$  287.0283 ( $^{79}\text{Br}$ ), found: 287.0278 ( $^{79}\text{Br}$ ).  $[\text{M}+\text{H}]^+$  289.0263 ( $^{81}\text{Br}$ ), found: 289.0257 ( $^{81}\text{Br}$ ).

---

### 6.3 Single Acyl Protection

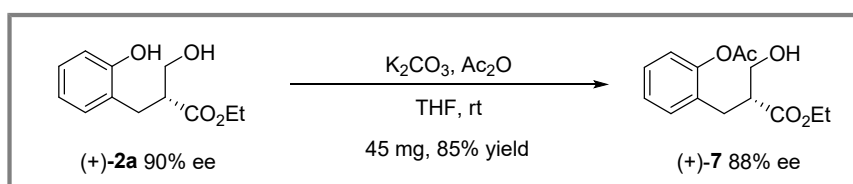

To a Schlenk tube, reductive product ethyl 3-hydroxy-2-(2-hydroxybenzyl)propanoate (+)-2a (90% ee, 44.8 mg, 0.2 mmol), tetrahydrofuran (3.0 mL) and potassium carbonate (56.0 mg, 0.4 mmol) were added under nitrogen gas. Then acetic anhydride (23  $\mu\text{L}$ , 0.25 mmol) in was slowly added and stirred for 9 hours. After completion of reaction (monitored by TLC), water (10 mL) and ethyl acetate (5 mL) were added, and the water layer was extracted with ethyl acetate three times. The combined organic layers were dried over anhydrous sodium sulfate, filtered and concentrated under the reduced pressure. The crude residue was purified by flash column chromatography on silica gel using dichloromethane/methanol (40:1) as eluent to give the single protected product (+)-7 without any loss of optical purity.

---

### (+)-Ethyl 2-(2-acetoxybenzyl)-3-hydroxypropanoate (7)

45 mg, 85% yield, viscous oil, new compound,  $R_f = 0.60$  (dichloromethane/methanol 40/1), 88% ee,  $[\alpha]_D^{20} = +7.83$  ( $c$  0.90,  $\text{CHCl}_3$ ).  $^1\text{H NMR}$  (400 MHz,  $\text{CDCl}_3$ )  $\delta$  7.27 (s, 2H), 7.22-7.13 (m, 1H), 7.05 (d,  $J = 7.9$  Hz, 1H), 4.16 (q,  $J = 7.0$  Hz, 2H), 3.85-3.71 (m, 1H), 3.69-3.61 (m, 1H), 3.02-2.89 (m, 1H), 2.89-2.71 (m, 2H), 2.34 (s, 4H), 1.23 (t,  $J = 7.1$  Hz, 3H).  $^{13}\text{C NMR}$  (100 MHz,  $\text{CDCl}_3$ )  $\delta$  174.6, 169.6, 149.1, 131.1, 130.7, 128.0, 126.2, 122.6, 61.9, 60.9, 47.6, 28.9, 21.0, 14.2. HPLC: Chiralcel OJ-H column, 230 nm, 30 °C,  $n$ -Hexane/ $i$ -PrOH = 70/30, flow = 0.8 mL/min, retention time 6.9 min (major) and 8.0. HRMS Calculated for  $\text{C}_{14}\text{H}_{19}\text{O}_5$   $[\text{M}+\text{H}]^+$  267.1227, found: 267.1242.

---

### 6.4 Double Acyl Protection

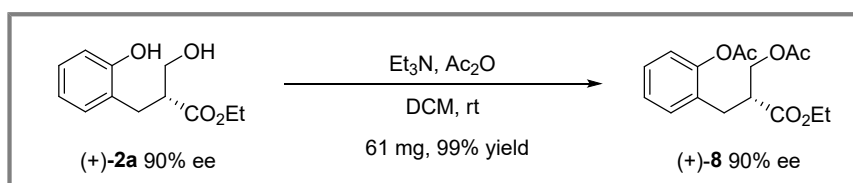

To a Schlenk tube, reductive product ethyl 3-hydroxy-2-(2-hydroxybenzyl)propanoate (+)-2a

(90% ee, 44.8 mg, 0.2 mmol), dichloromethane (2.0 mL) and triethylamine (69  $\mu$ L, 0.5 mmol) were added under nitrogen gas. Then acetic anhydride (47  $\mu$ L, 0.5 mmol) in was slowly added and stirred overnight. After completion of reaction (monitored by TLC), water (10 mL) and ethyl acetate (5 mL) were added, and the water layer was extracted with ethyl acetate three times. The combined organic layers were dried over anhydrous sodium sulfate, filtered and concentrated under the reduced pressure. The crude residue was purified by flash column chromatography on silica gel using hexanes/ethyl acetate (5/1) as eluent to give the double acyl protected product (-)-**8** without any loss of optical purity.

---

**(-)-Ethyl 3-acetoxy-2-(2-acetoxybenzyl)propanoate (8)**

61 mg, 99% yield, viscous oil, new compound,  $R_f = 0.50$  (hexanes/ethyl acetate 5/1), 90% ee,  $[\alpha]_D^{20} = -2.75$  ( $c$  1.20,  $\text{CHCl}_3$ ).  $^1\text{H NMR}$  (400 MHz,  $\text{CDCl}_3$ )  $\delta$  7.29-7.03 (m, 4H), 4.28-4.16 (m, 2H), 4.16-4.04 (m, 2H), 3.04-2.87 (m, 2H), 2.81-2.68 (m, 1H), 2.34 (s, 3H), 2.02 (s, 3H), 1.17 (t,  $J = 7.1$  Hz, 3H).  $^{13}\text{C NMR}$  (100 MHz,  $\text{CDCl}_3$ )  $\delta$  172.7, 170.6, 169.3, 149.2, 130.9, 130.1, 128.1, 126.2, 122.6, 64.0, 60.9, 45.1, 29.7, 20.9, 20.8, 14.1. HPLC: Chiralcel OD-H column, 254 nm, 30  $^\circ\text{C}$ ,  $n$ -Hexane/ $i$ -PrOH = 95/5, flow = 0.8 mL/min, retention time 13.3 min and 14.0 (major). The HRMS Calculated for  $\text{C}_{16}\text{H}_{21}\text{O}_6$   $[\text{M}+\text{H}]^+$  309.1333, found: 309.1337.

---

## 7. Determination of Absolute Configuration

### 7.1 Absolute Configuration of Product (+)-2o

To determine the absolute configuration of (+)-ethyl 3-hydroxy-2-((2-hydroxynaphthalen-1-yl)methyl)propanoate (**2o**, >99% ee): (+)-**2o** was completely dissolved in ethyl acetate (1.0 mL), *n*-hexane (5.0 mL) was added slowly at room temperature. The solvent diffused slowly, and the single crystal was obtained after 14 days. The structure in **Figure S1** showed the absolute configuration is (*R*). The CCDC number is 2247354. These details can be obtained free of charge via [www.ccdc.com.ac.uk/data\\_request/cif](http://www.ccdc.com.ac.uk/data_request/cif) from the Cambridge Crystallographic Data Centre.

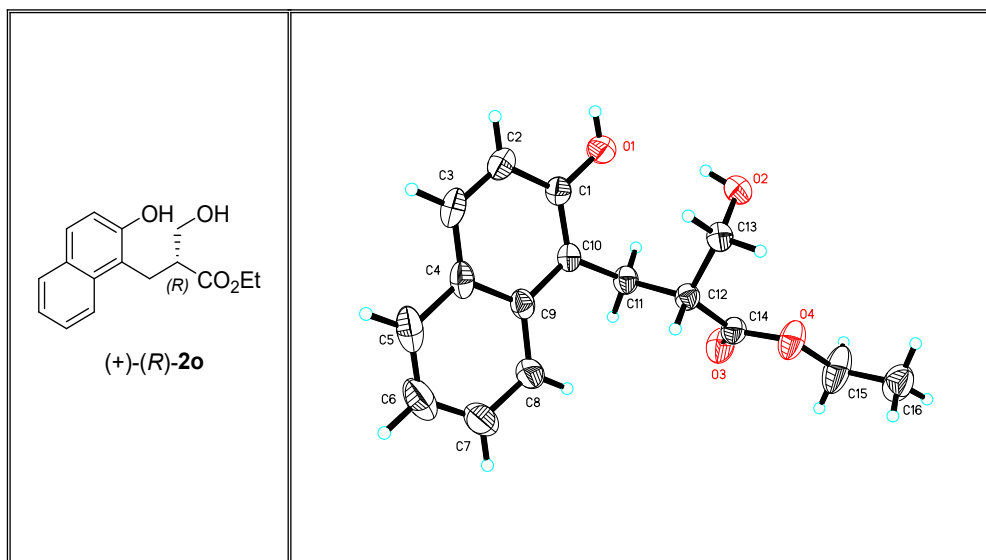

**Figure S1.** X-Ray Structure of Chiral Reductive Product (+)-(*R*)-**2o**

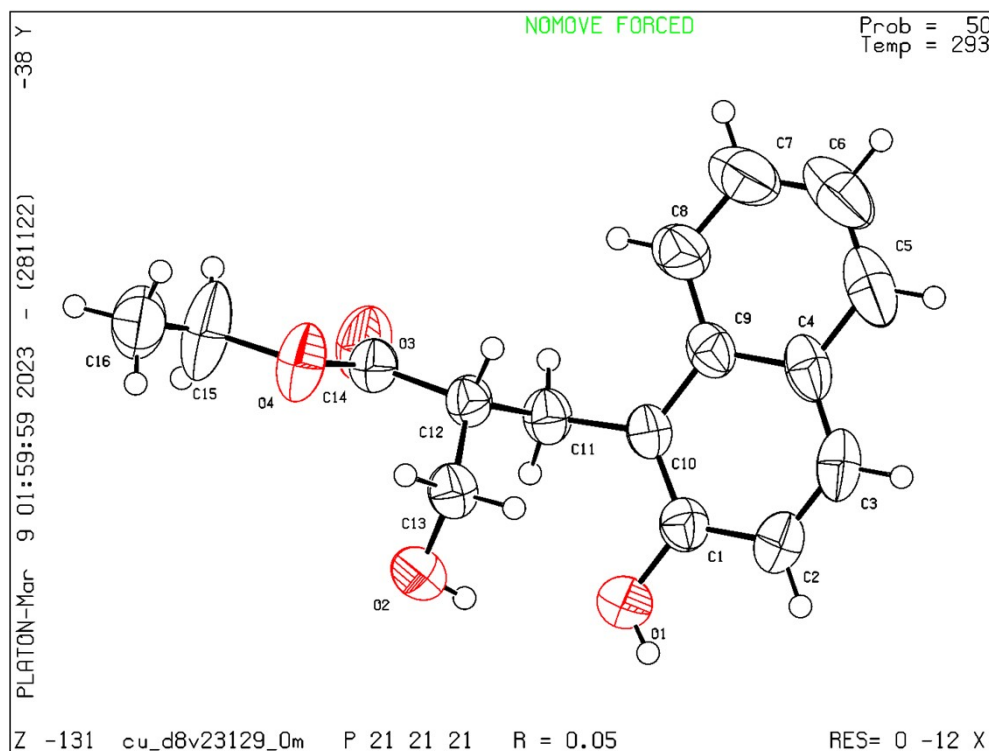

### Crystal Data and Structure Refinement for cu\_d8v21614\_0m for (+)-(R)-2n

|                                   |                                             |                     |
|-----------------------------------|---------------------------------------------|---------------------|
| Identification code               | cu_d8v23129_0m                              |                     |
| Empirical formula                 | C16 H18 O4                                  |                     |
| Formula weight                    | 274.30                                      |                     |
| Temperature                       | 293(2) K                                    |                     |
| Wavelength                        | 1.54178 Å                                   |                     |
| Crystal system                    | Orthorhombic                                |                     |
| Space group                       | P 21 21 21                                  |                     |
| Unit cell dimensions              | a = 7.0614(3) Å                             | $\alpha = 90^\circ$ |
|                                   | b = 10.6993(4) Å                            | $\beta = 90^\circ$  |
|                                   | c = 18.6749(8) Å                            | $\gamma = 90^\circ$ |
| Volume                            | 1410.93(10) Å <sup>3</sup>                  |                     |
| Z                                 | 4                                           |                     |
| Density (calculated)              | 1.291 Mg/m <sup>3</sup>                     |                     |
| Absorption coefficient            | 0.756 mm <sup>-1</sup>                      |                     |
| F(000)                            | 584                                         |                     |
| Crystal size                      | 0.180 x 0.140 x 0.100 mm <sup>3</sup>       |                     |
| Theta range for data collection   | 4.763 to 67.464°.                           |                     |
| Index ranges                      | -8<=h<=8, -12<=k<=12, -22<=l<=20            |                     |
| Reflections collected             | 9206                                        |                     |
| Independent reflections           | 2510 [R(int) = 0.0598]                      |                     |
| Completeness to theta = 67.679°   | 98.1 %                                      |                     |
| Absorption correction             | Semi-empirical from equivalents             |                     |
| Max. and min. transmission        | 0.7533 and 0.4628                           |                     |
| Refinement method                 | Full-matrix least-squares on F <sup>2</sup> |                     |
| Data / restraints / parameters    | 2510 / 0 / 185                              |                     |
| Goodness-of-fit on F <sup>2</sup> | 1.073                                       |                     |
| Final R indices [I>2sigma(I)]     | R1 = 0.0464, wR2 = 0.1241                   |                     |
| R indices (all data)              | R1 = 0.0519, wR2 = 0.1296                   |                     |
| Absolute structure parameter      | 0.05(15)                                    |                     |
| Extinction coefficient            | 0.029(5)                                    |                     |
| Largest diff. peak and hole       | 0.158 and -0.140 e.Å <sup>-3</sup>          |                     |

## 7.2 Absolute Configuration of Product (+)-3a'

To determine the absolute configuration of (+)-ethyl 3-benzyl-2-oxochromane-3-carboxylate (**3a'**, >99% ee): (+)-**3a'** was completely dissolved in dichloromethane (0.1 mL), *n*-hexane (0.5 mL) was added slowly at room temperature. The solvent diffused slowly, and the single crystal was obtained after two days. The structure in **Figure S2** showed the absolute configuration is (*S*). The CCDC number is 2247355. These details can be obtained free of charge *via* [www.ccdc.com.ac.uk/data\\_request/cif](http://www.ccdc.com.ac.uk/data_request/cif) from the Cambridge Crystallographic Data Centre.

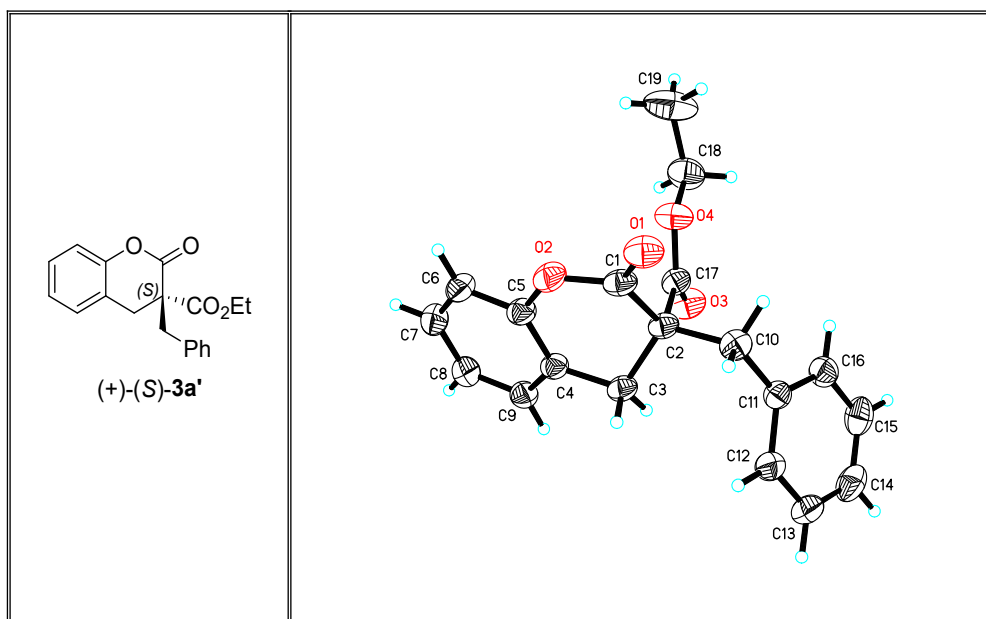

**Figure S2.** X-Ray Structure of Chiral Compound (+)-(*S*)-**3a'**

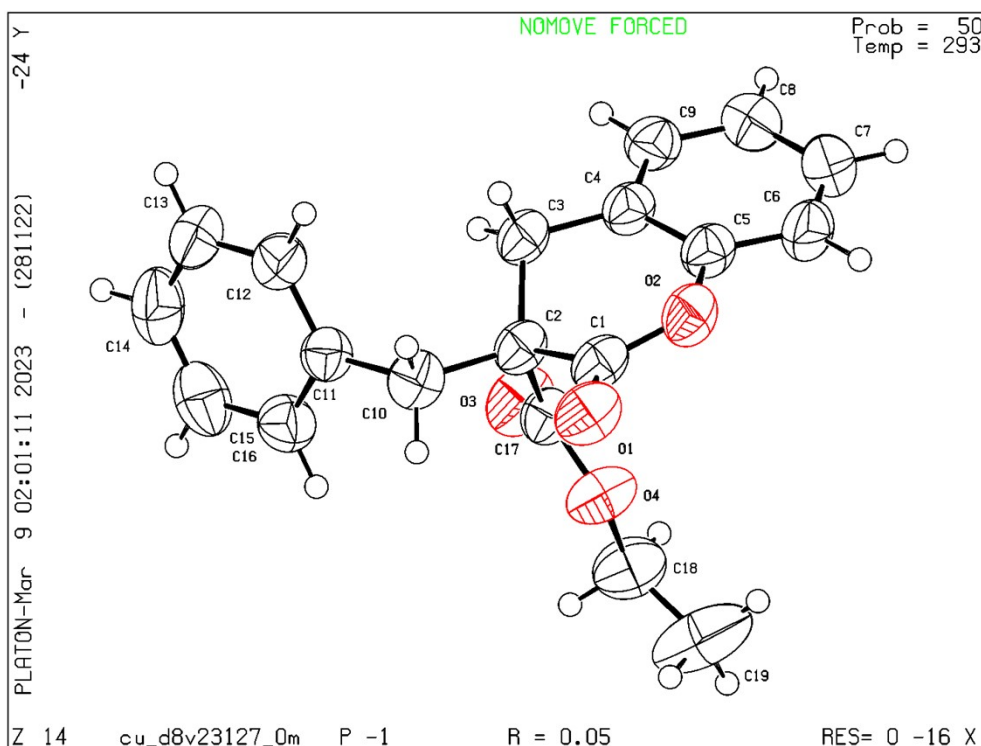

### Crystal Data and Structure Refinement for cu\_d8v21614\_0m for (+)-(S)-3a'

|                                   |                                             |                              |
|-----------------------------------|---------------------------------------------|------------------------------|
| Identification code               | cu_d8v23127_0m                              |                              |
| Empirical formula                 | C19 H18 O4                                  |                              |
| Formula weight                    | 310.33                                      |                              |
| Temperature                       | 293(2) K                                    |                              |
| Wavelength                        | 1.54178 Å                                   |                              |
| Crystal system                    | Triclinic                                   |                              |
| Space group                       | P -1                                        |                              |
| Unit cell dimensions              | a = 8.2353(3) Å                             | $\alpha = 82.2410(10)^\circ$ |
|                                   | b = 9.8484(4) Å                             | $\beta = 70.296(2)^\circ$    |
|                                   | c = 11.7427(5) Å                            | $\gamma = 66.5120(10)^\circ$ |
| Volume                            | 822.33(6) Å <sup>3</sup>                    |                              |
| Z                                 | 2                                           |                              |
| Density (calculated)              | 1.253 Mg/m <sup>3</sup>                     |                              |
| Absorption coefficient            | 0.714 mm <sup>-1</sup>                      |                              |
| F(000)                            | 328                                         |                              |
| Crystal size                      | 0.200 x 0.150 x 0.120 mm <sup>3</sup>       |                              |
| Theta range for data collection   | 3.999 to 67.492°.                           |                              |
| Index ranges                      | -9<=h<=9, -11<=k<=11, -14<=l<=14            |                              |
| Reflections collected             | 28232                                       |                              |
| Independent reflections           | 2856 [R(int) = 0.0623]                      |                              |
| Completeness to theta = 67.679°   | 96.4 %                                      |                              |
| Absorption correction             | Semi-empirical from equivalents             |                              |
| Max. and min. transmission        | 0.7456 and 0.5300                           |                              |
| Refinement method                 | Full-matrix least-squares on F <sup>2</sup> |                              |
| Data / restraints / parameters    | 2856 / 0 / 210                              |                              |
| Goodness-of-fit on F <sup>2</sup> | 1.046                                       |                              |
| Final R indices [I>2sigma(I)]     | R1 = 0.0489, wR2 = 0.1336                   |                              |
| R indices (all data)              | R1 = 0.0505, wR2 = 0.1352                   |                              |
| Extinction coefficient            | 0.059(11)                                   |                              |
| Largest diff. peak and hole       | 0.209 and -0.127 e.Å <sup>-3</sup>          |                              |



## 8. Proposed Mechanism of DKR

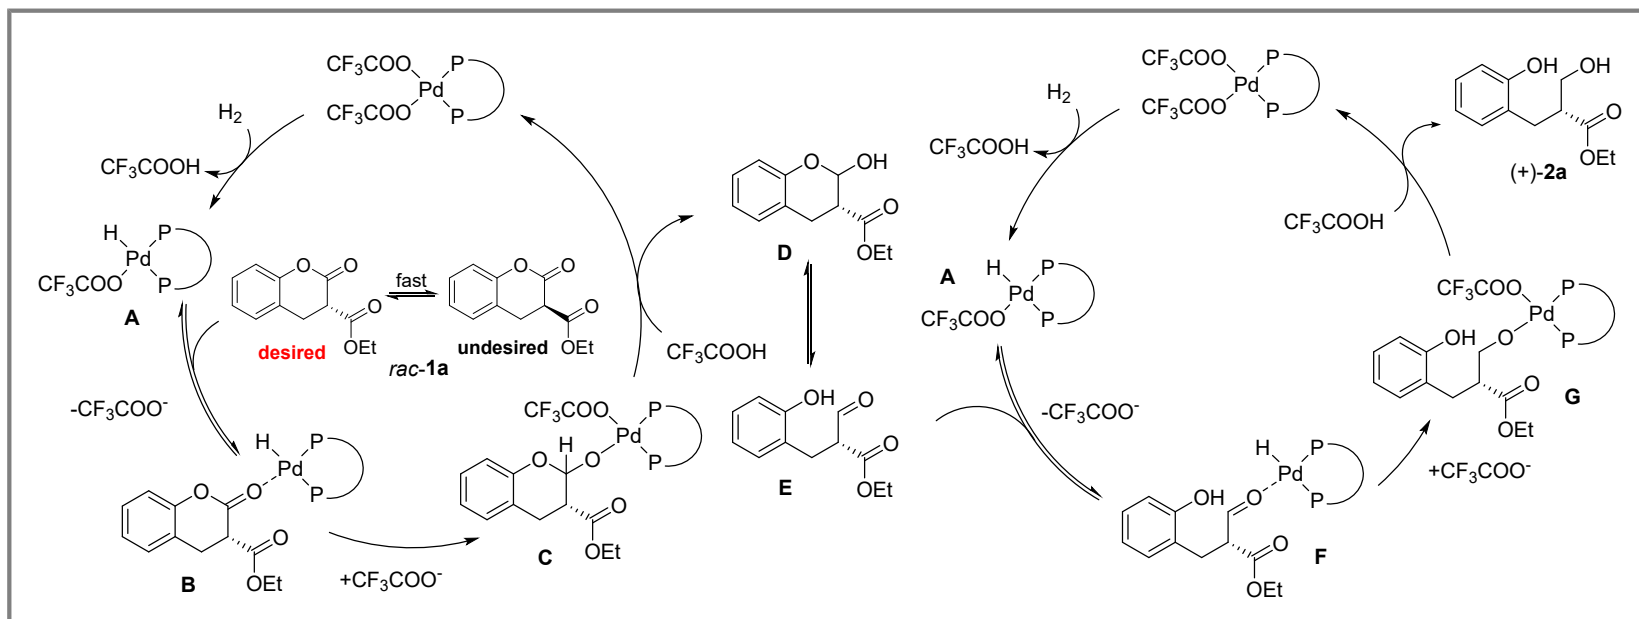

## 9. References

1. Suljic, S; Pietruszka, J. Synthesis of 3-Arylated 3,4-Dihydrocoumarins: Combining Continuous Flow Hydrogenation with Laccase-catalysed Oxidations. *Adv. Synth. Catal.* **2014**, *356*, 1007-1020.
2. Velasco, M.; Romero-Ceronio, N.; Torralba, R.; Abreu, O. H.; Vilchis-Reyes, M. A.; Alarcón-Matus, E.; Ramos-Rivera, E. M.; Aparicio, D. M.; Jiménez, J.; García, E. A.; Cruz, D. C.; Gómez, C. V.; Alvarado, C. Piperidine-iodine as Efficient Dual Catalyst for the One-pot, Three-component Synthesis of Coumarin-3-carboxamides. *Molecules* **2022**, *27*, 4659-4668.
3. Ramachary, D. B.; Kishor, M.; Reddy, Y. V. Development of Pharmaceutical Drugs, Drug Intermediates and Ingredients by Using Direct Organo-click Reactions. *Eur. J. Org. Chem.* **2008**, 975-993.
4. Mitra, A. K.; Misra, S. K.; Patra, A. New Synthesis of 3-Alkyl Coumarins. *Synth. Commun.* **1980**, *10*, 915-919.
5. Liu, Z.; Liu, Q.; Zhang, W.; Mu, R.; Yang, L.; Liu, Z.-L.; Yu, W. Selective Reduction of the Endocyclic Double Bond of 3-Substituted Coumarins by Hantzsch 1,4-Dihydropyridine. *Synthesis* **2006**, *5*, 771-774.

## 10. Copy of NMR and HPLC Spectra

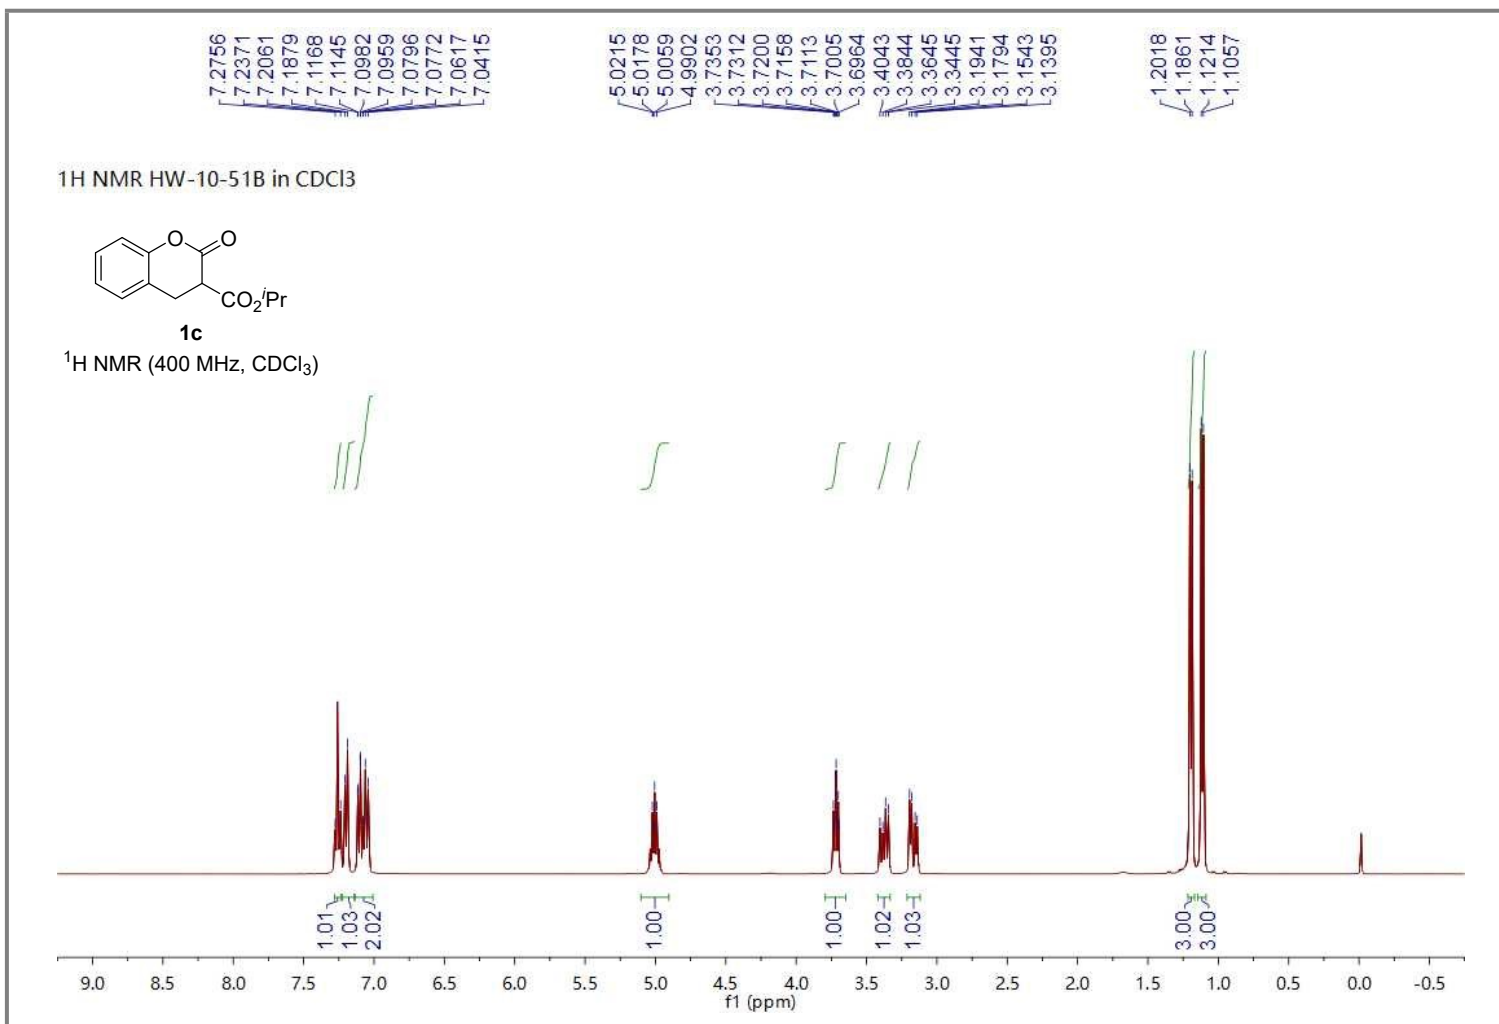

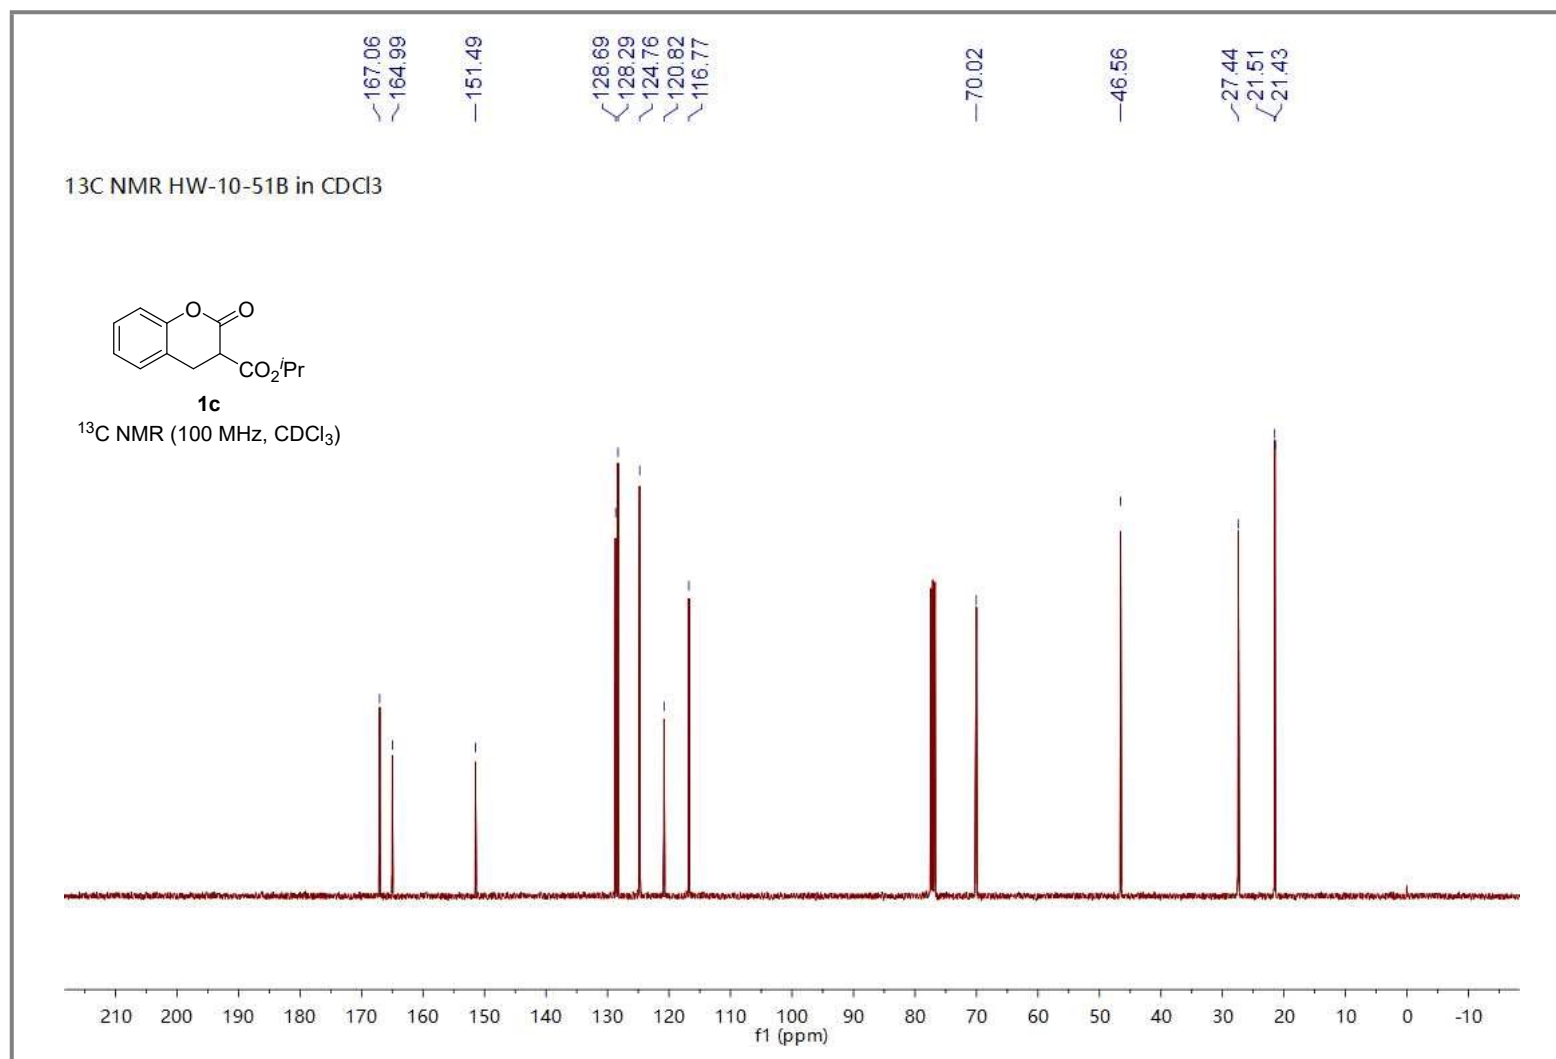

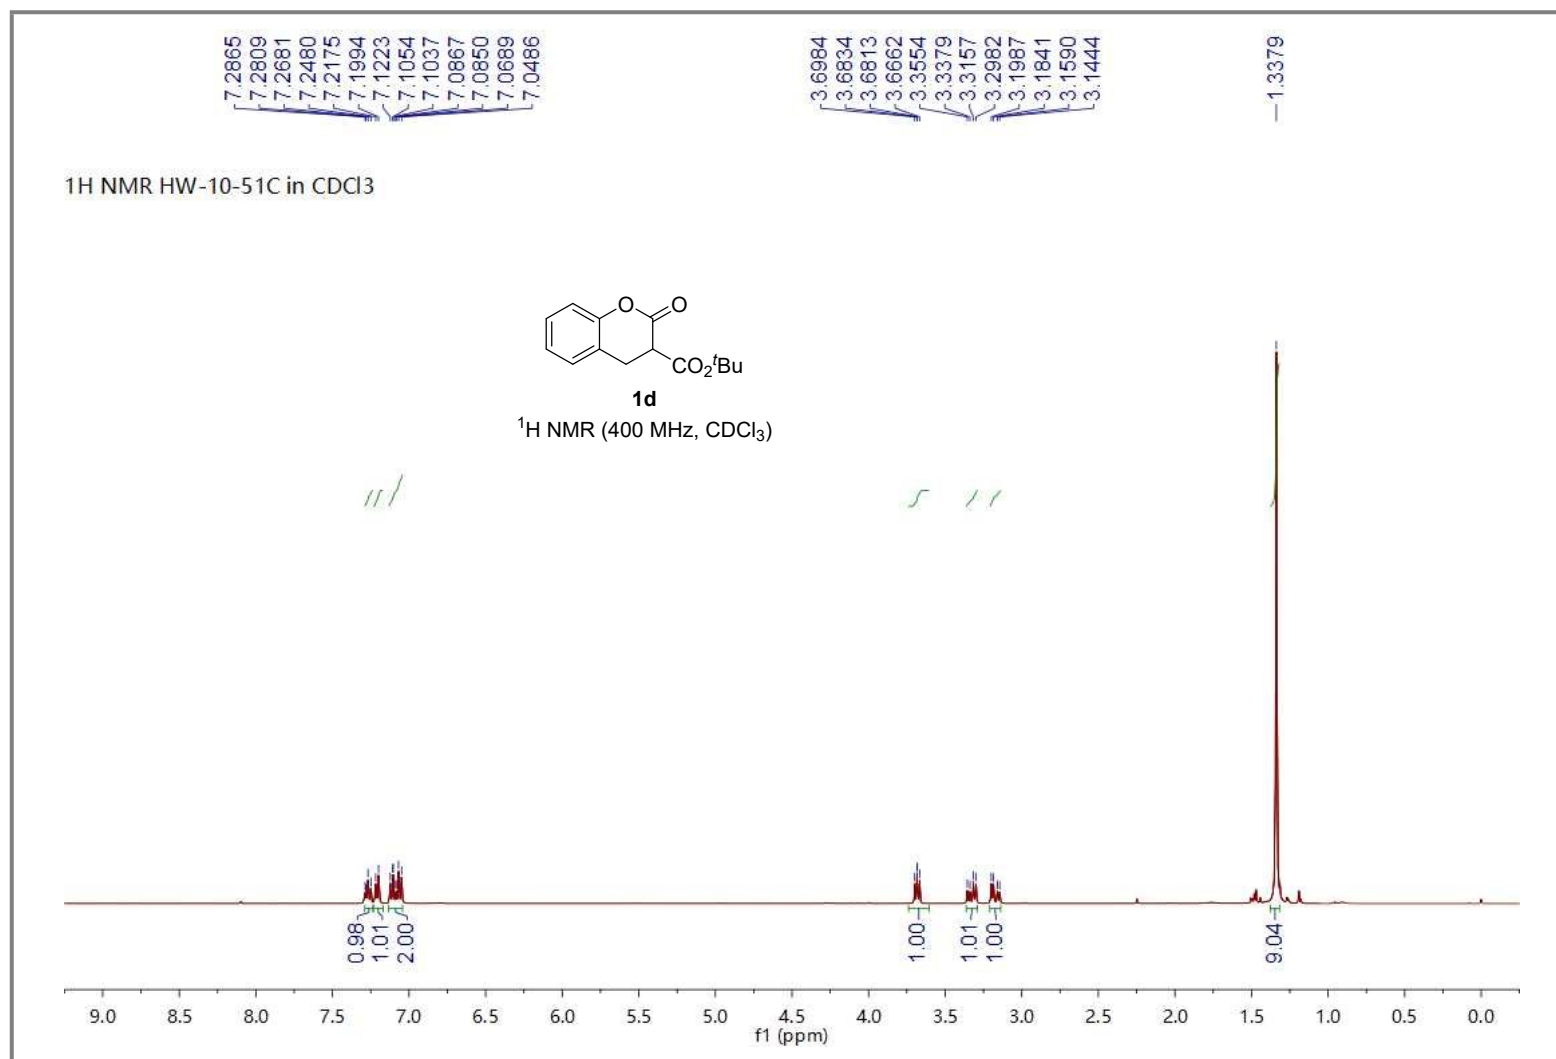

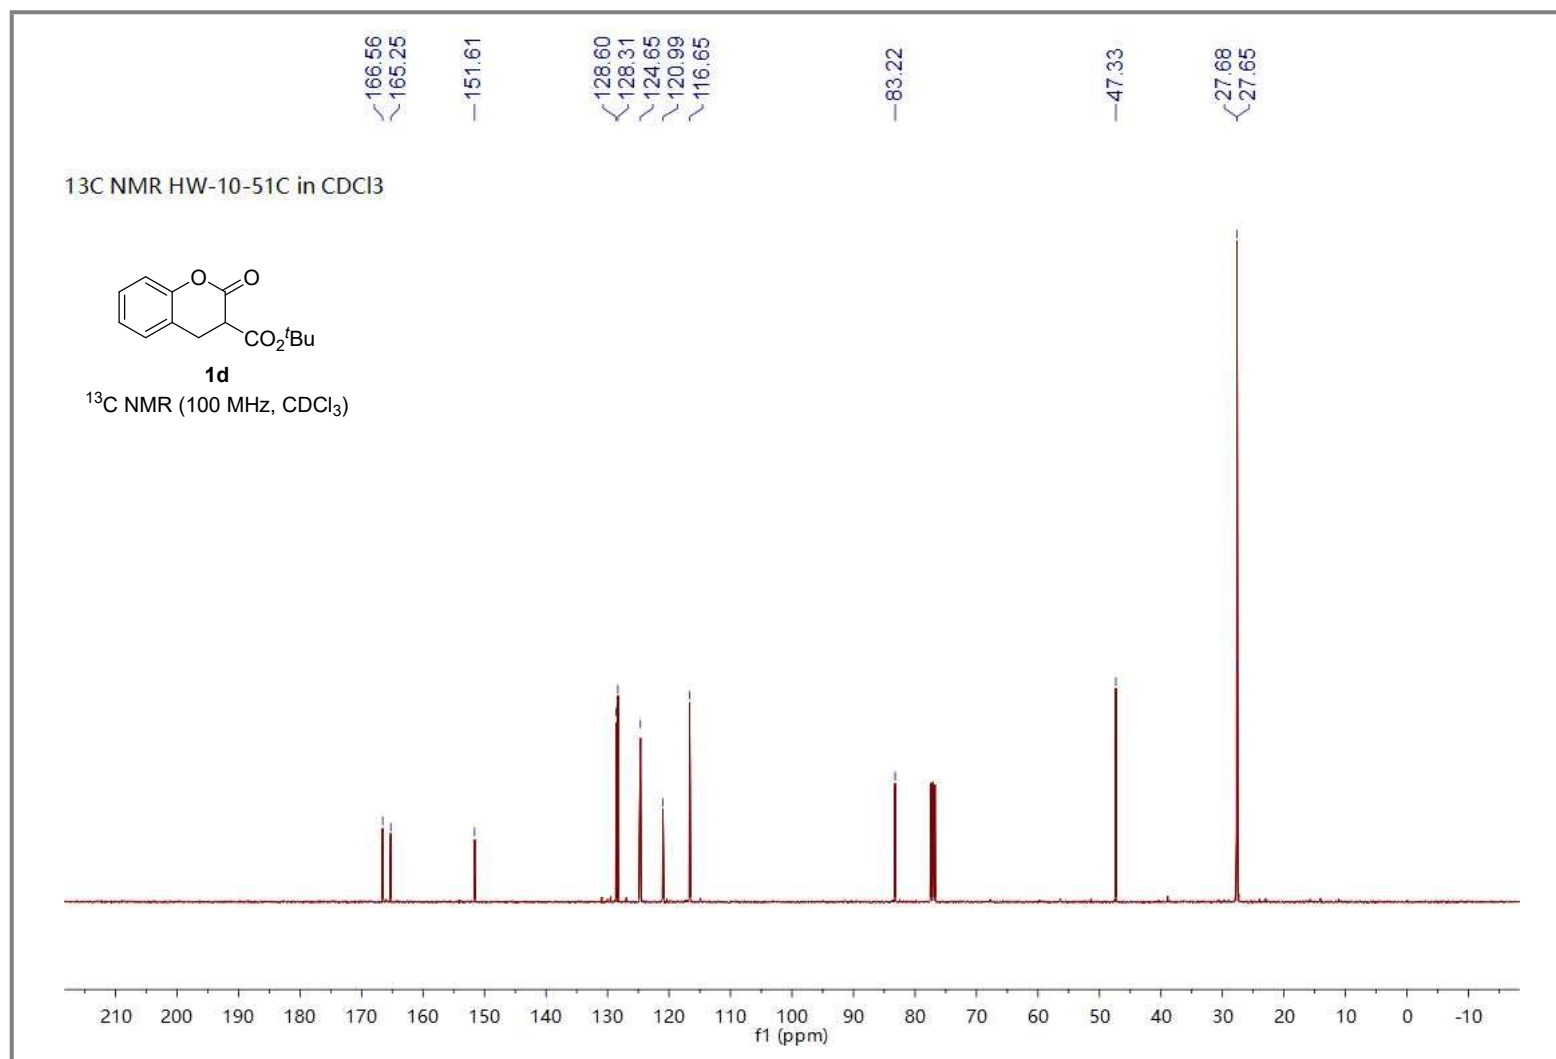

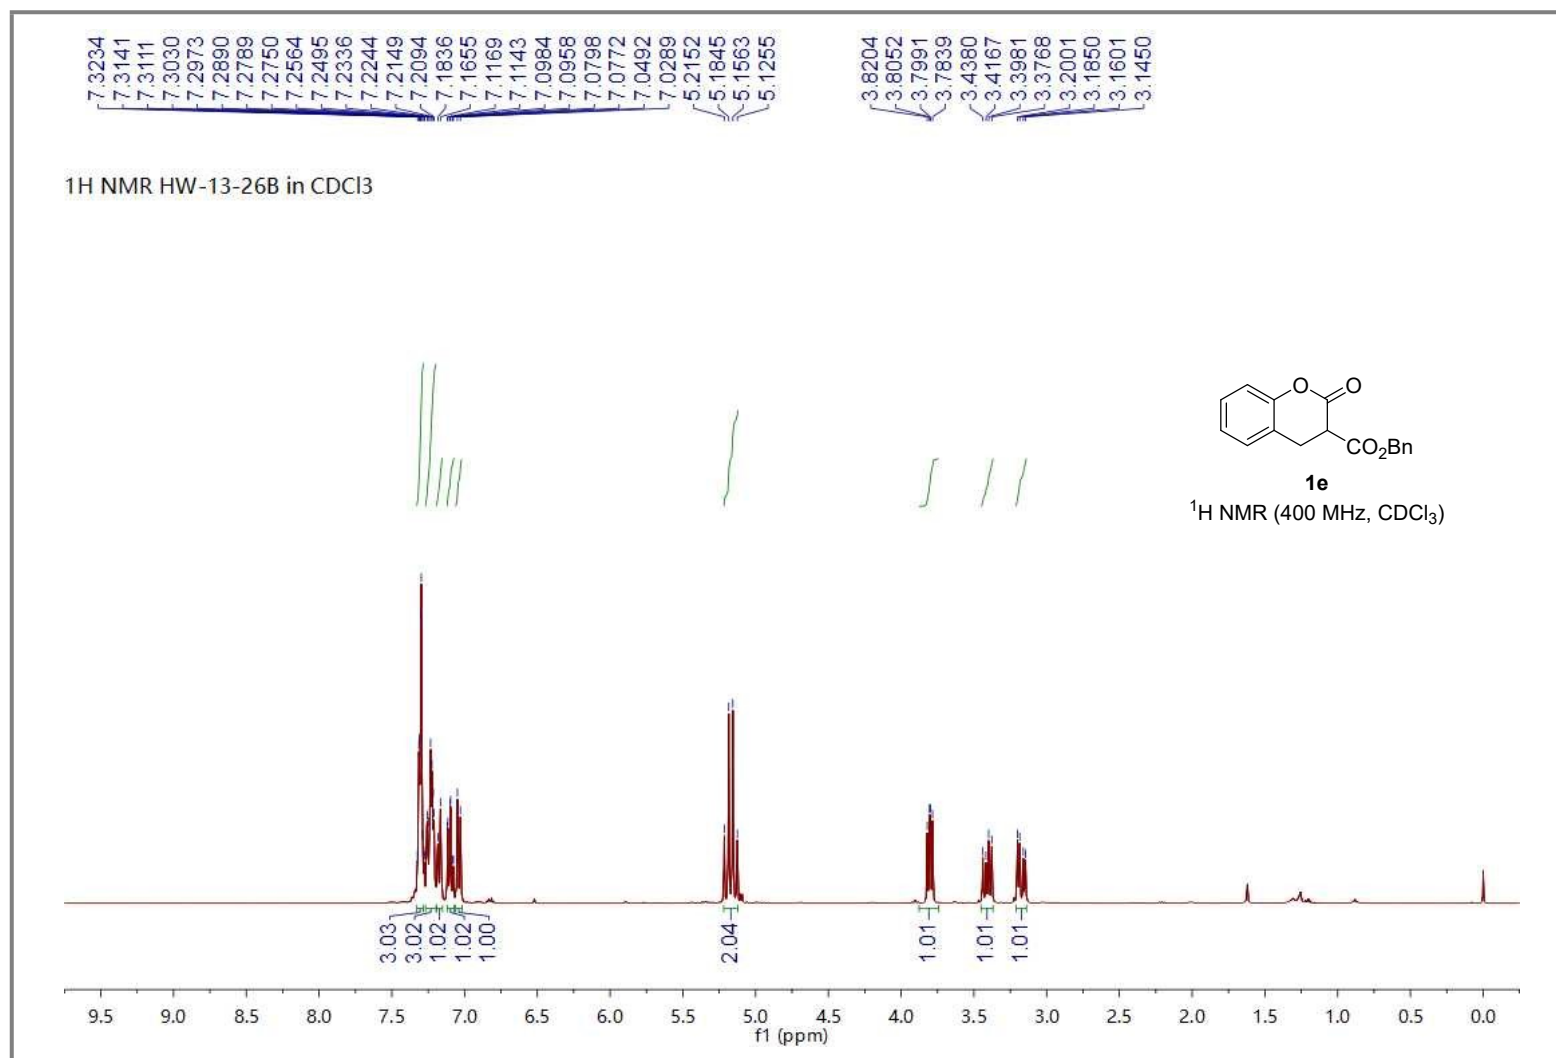

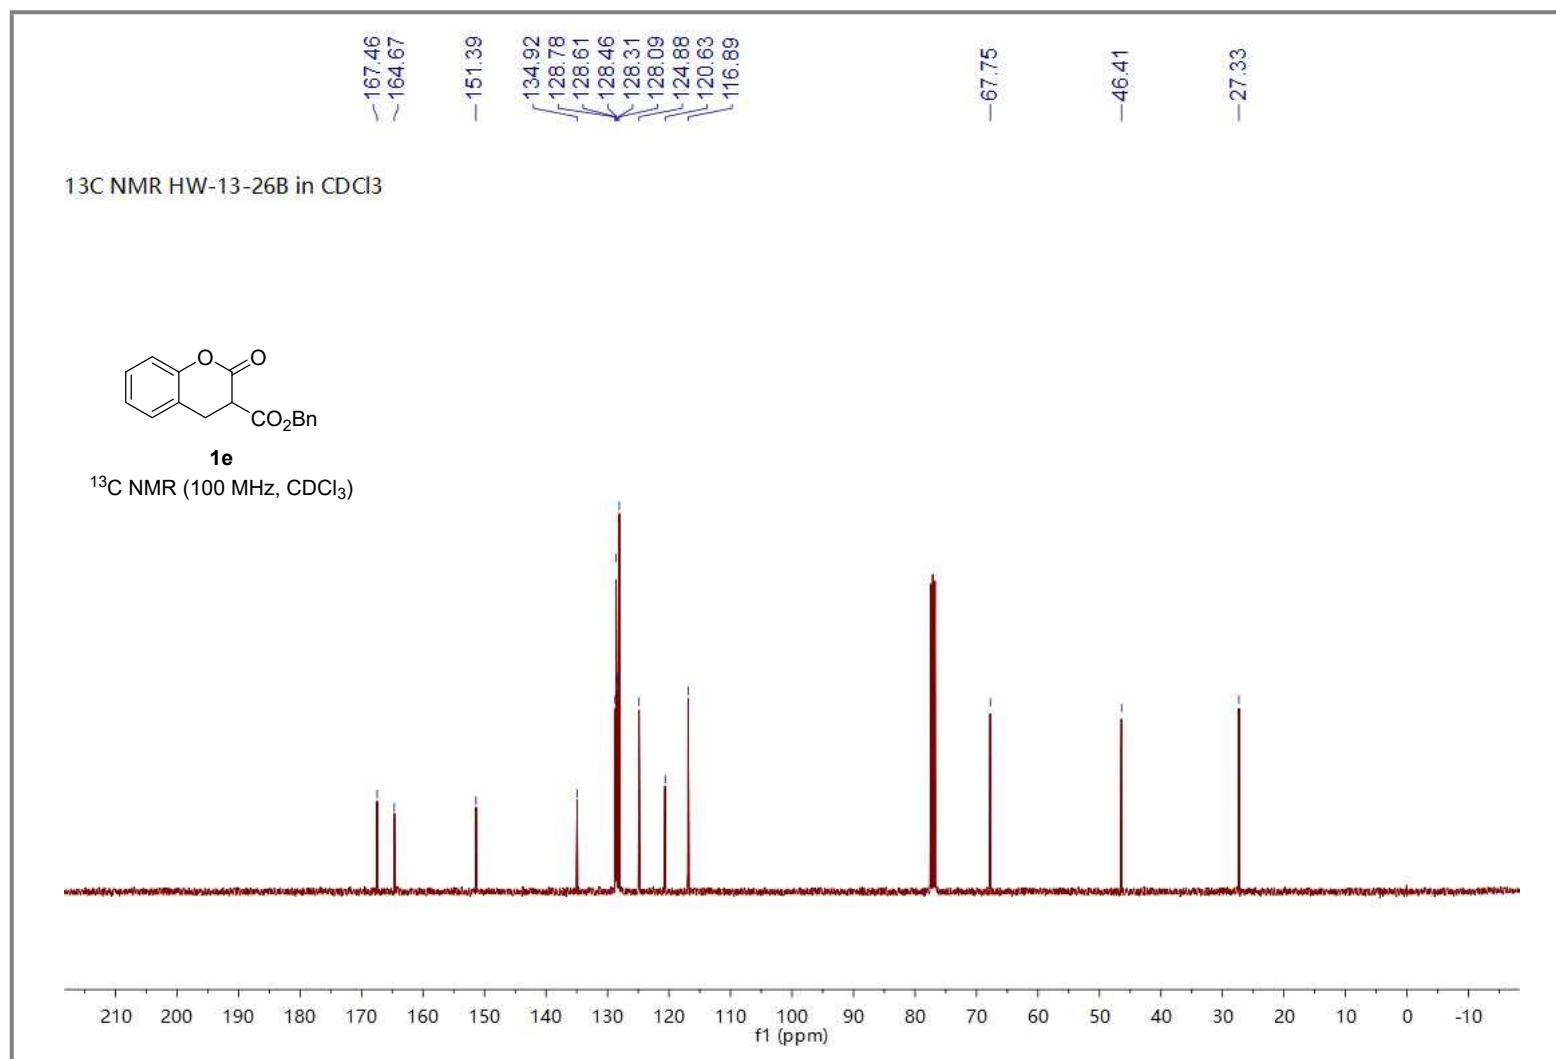



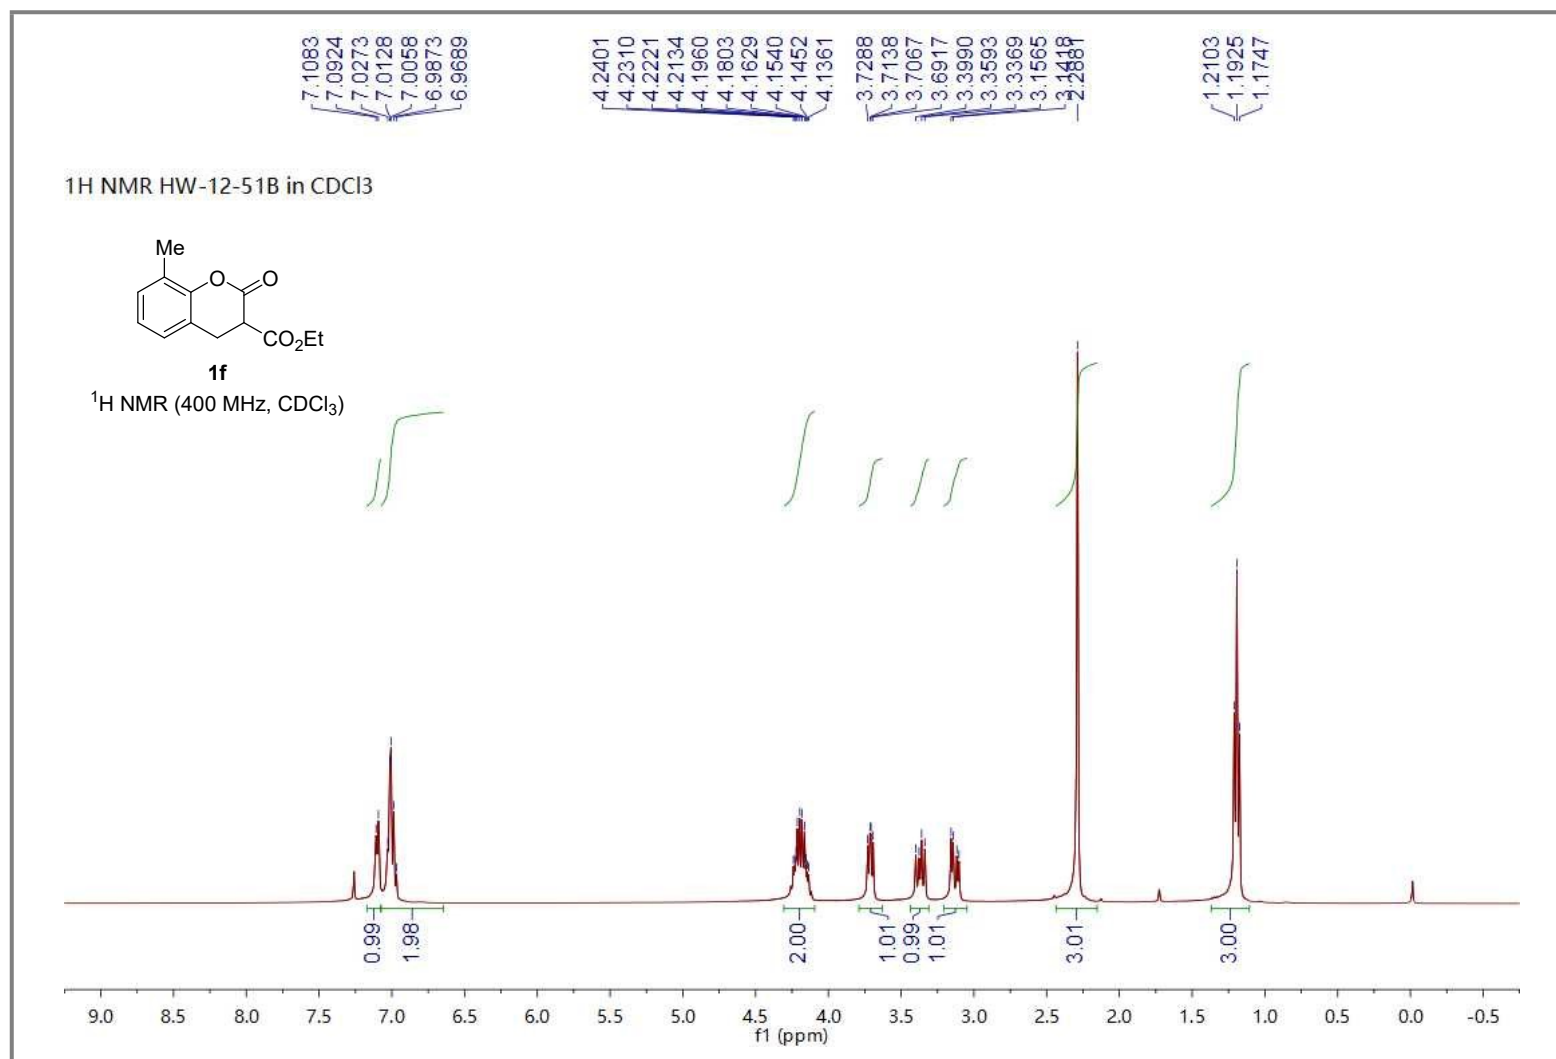

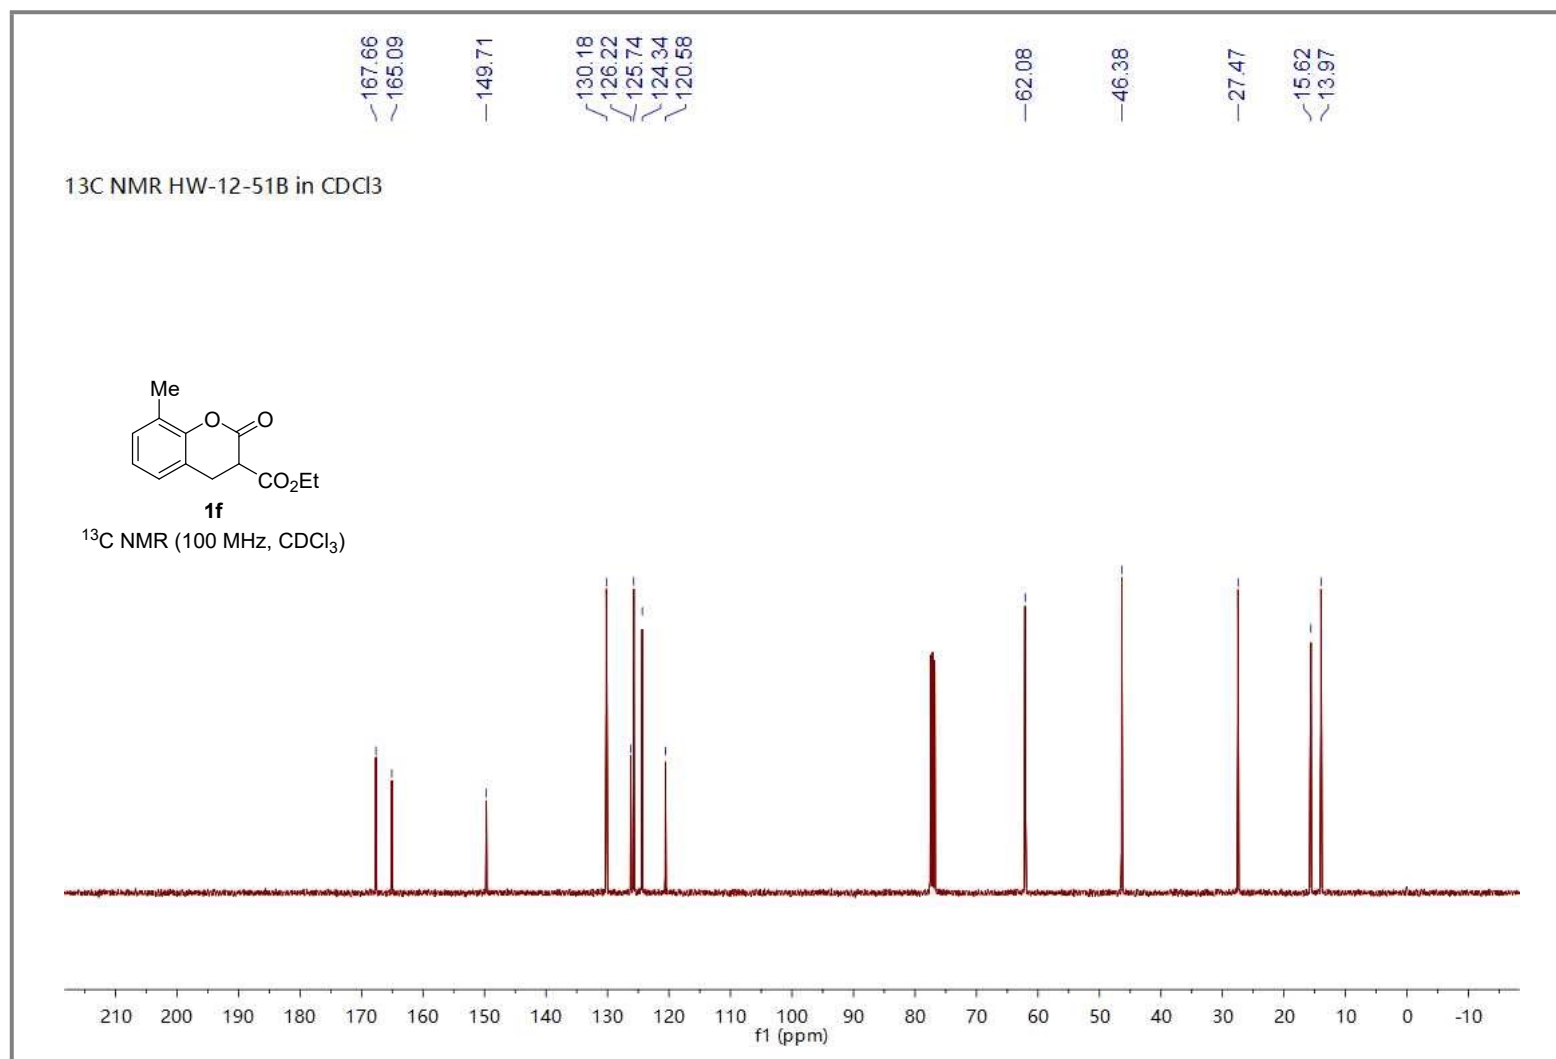

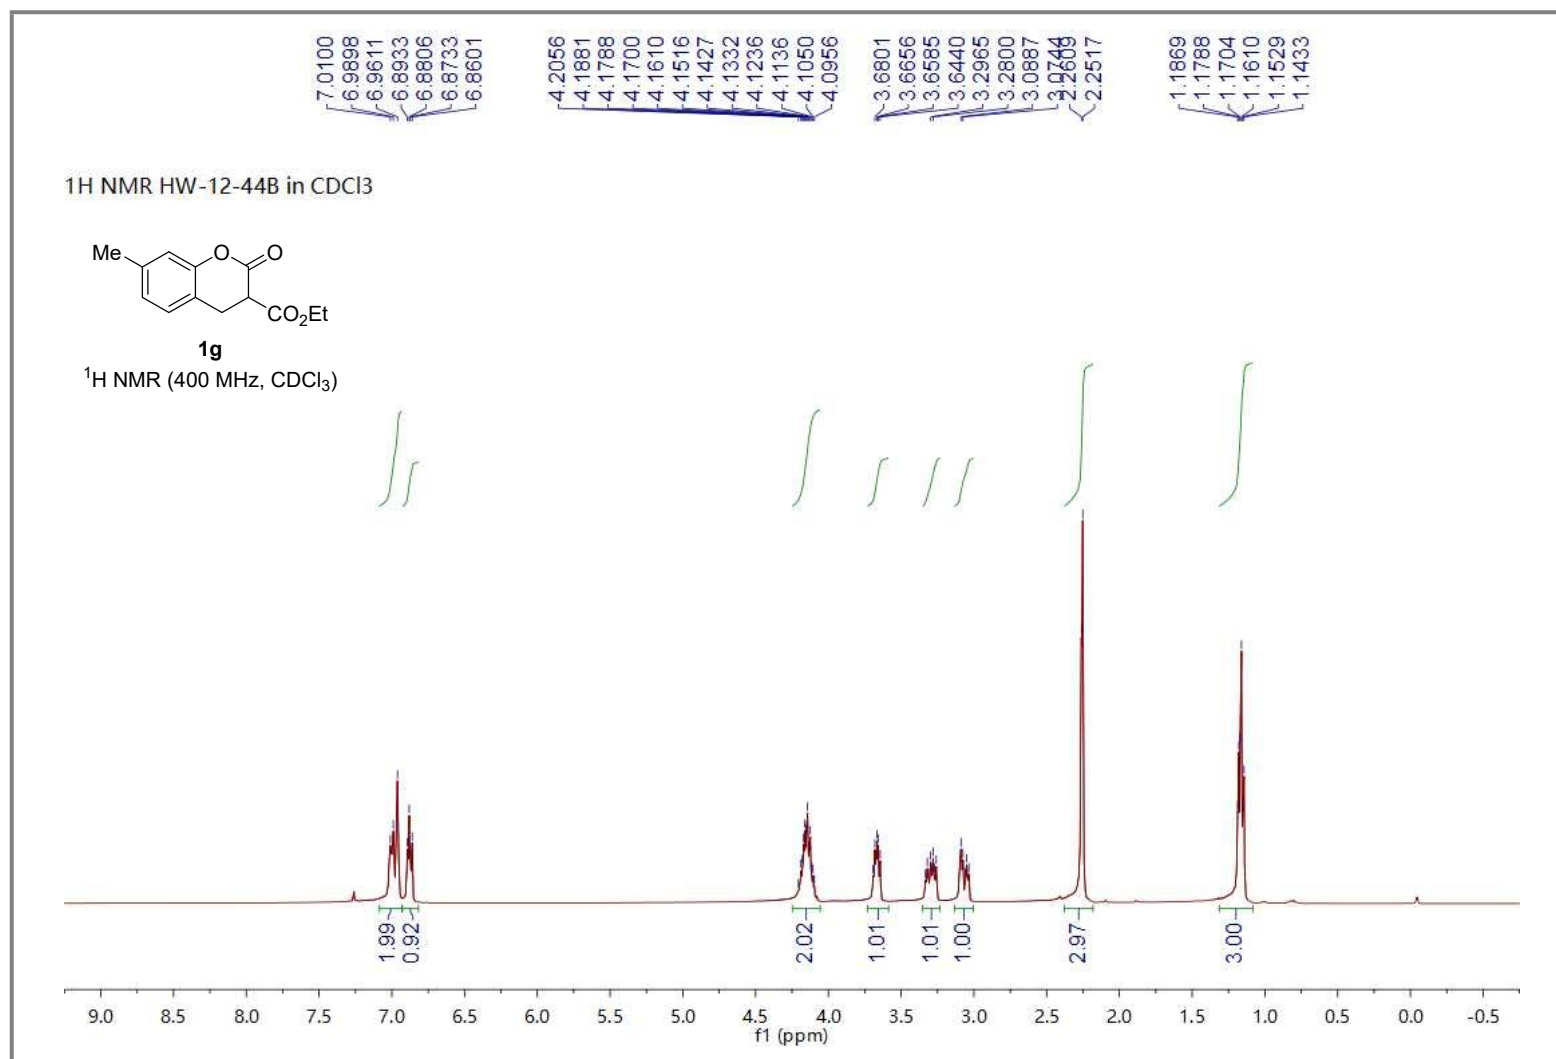

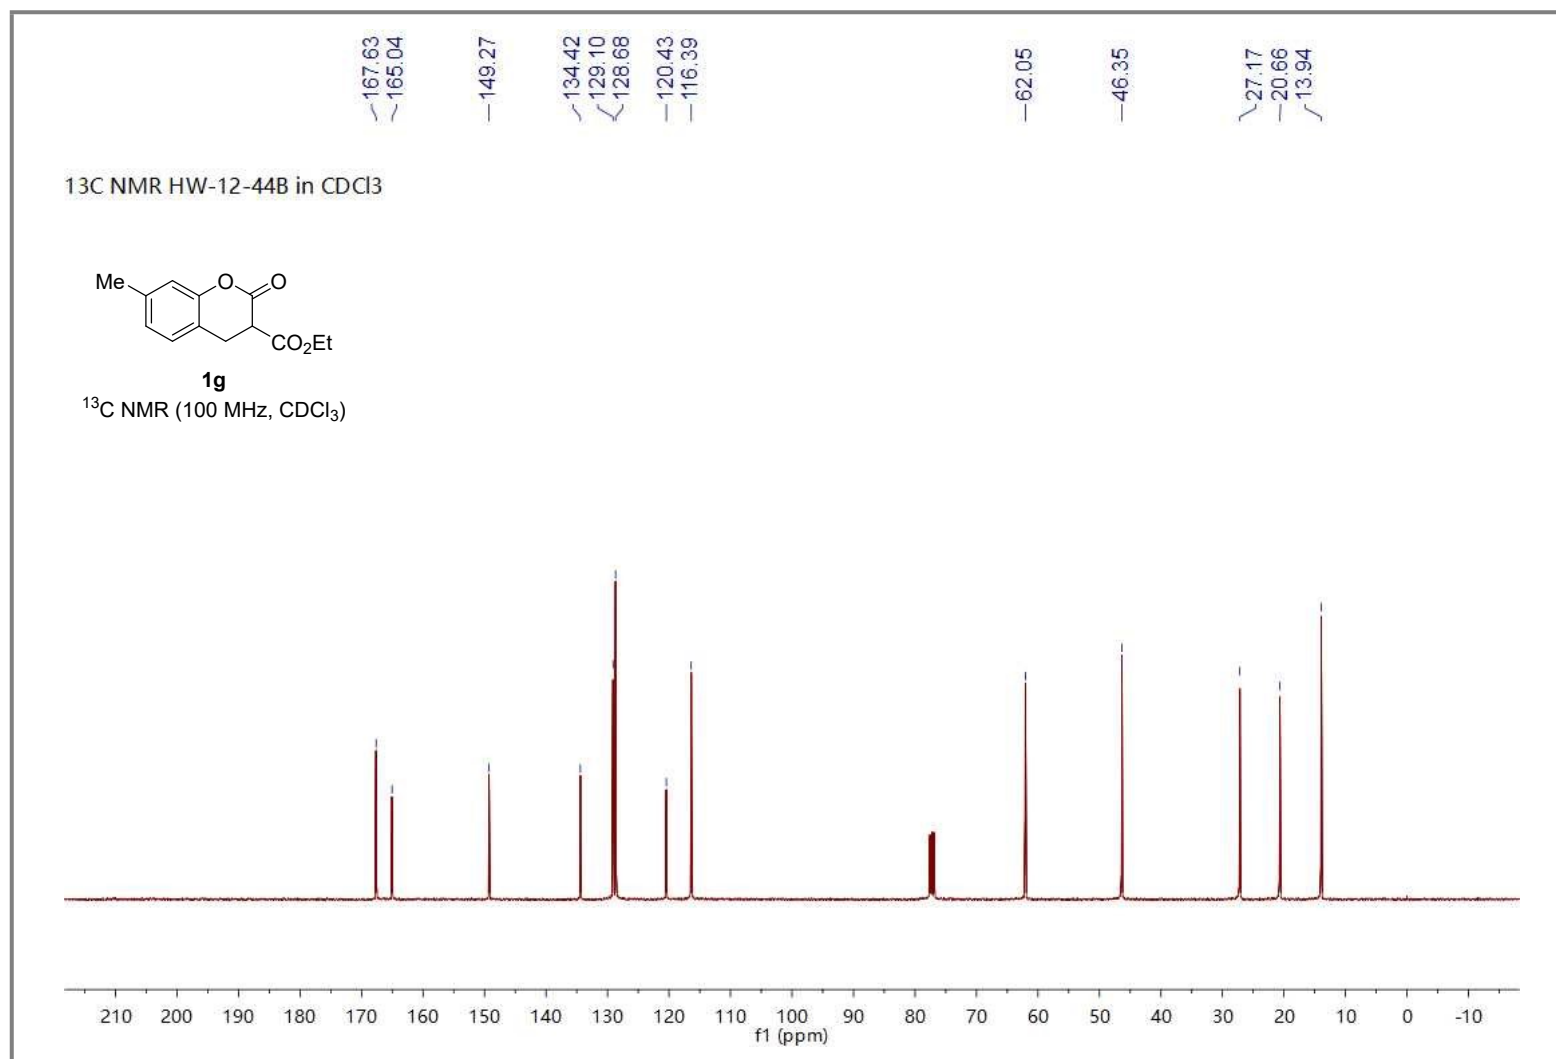

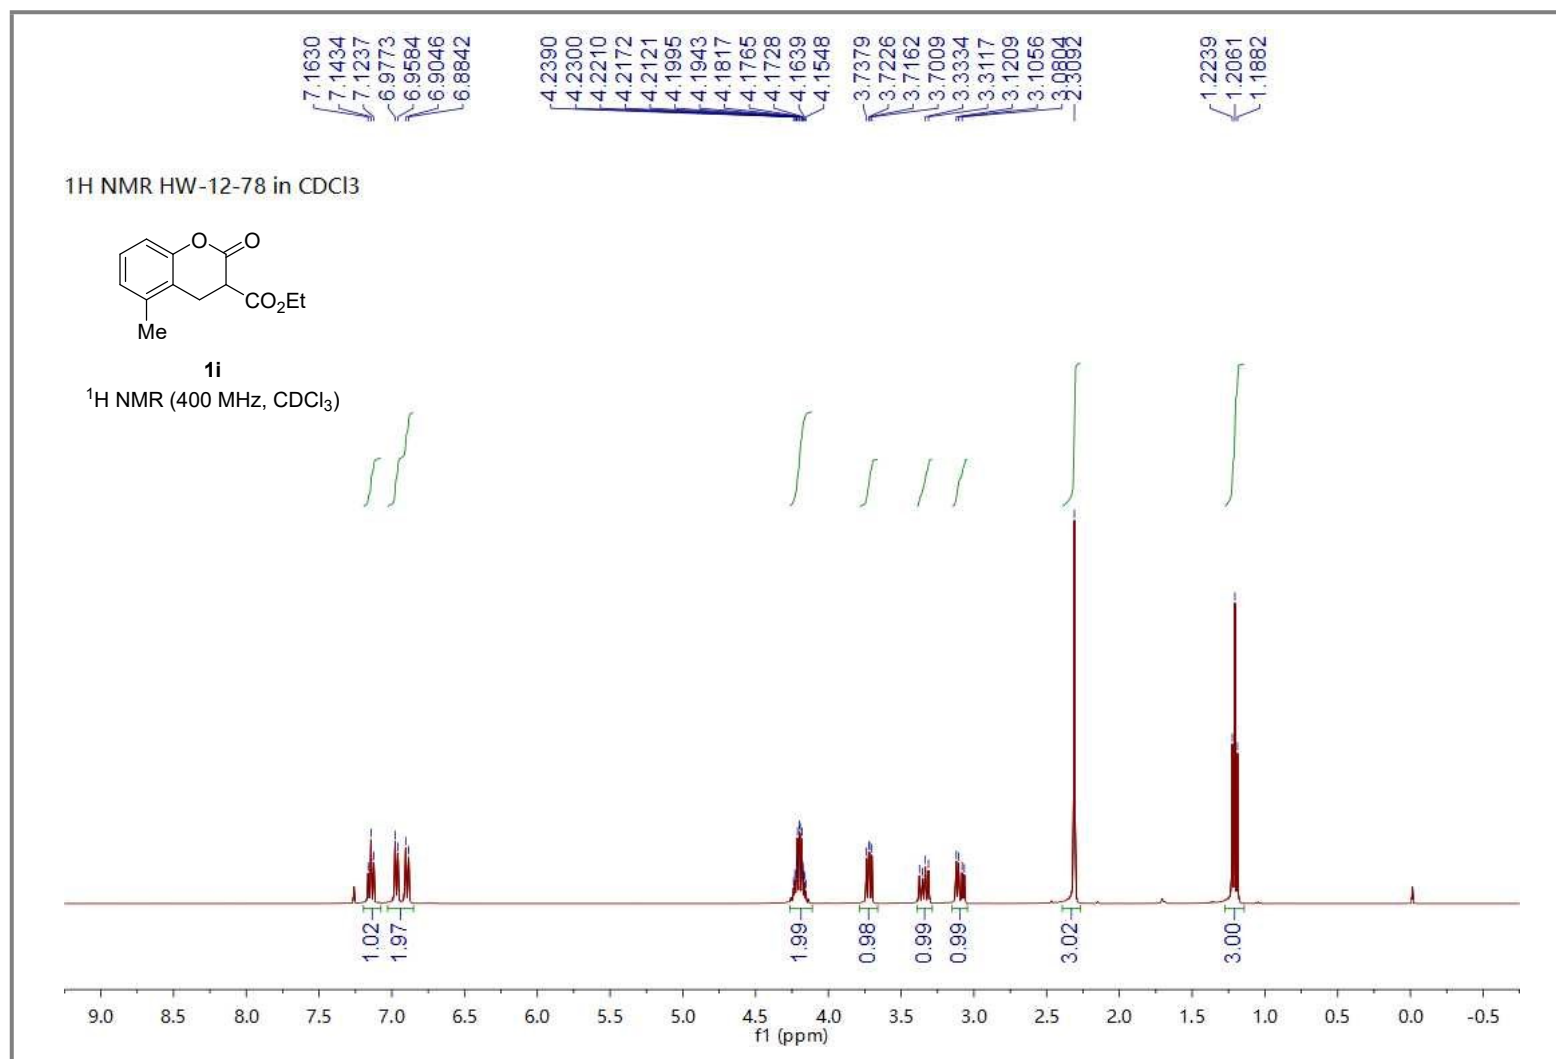

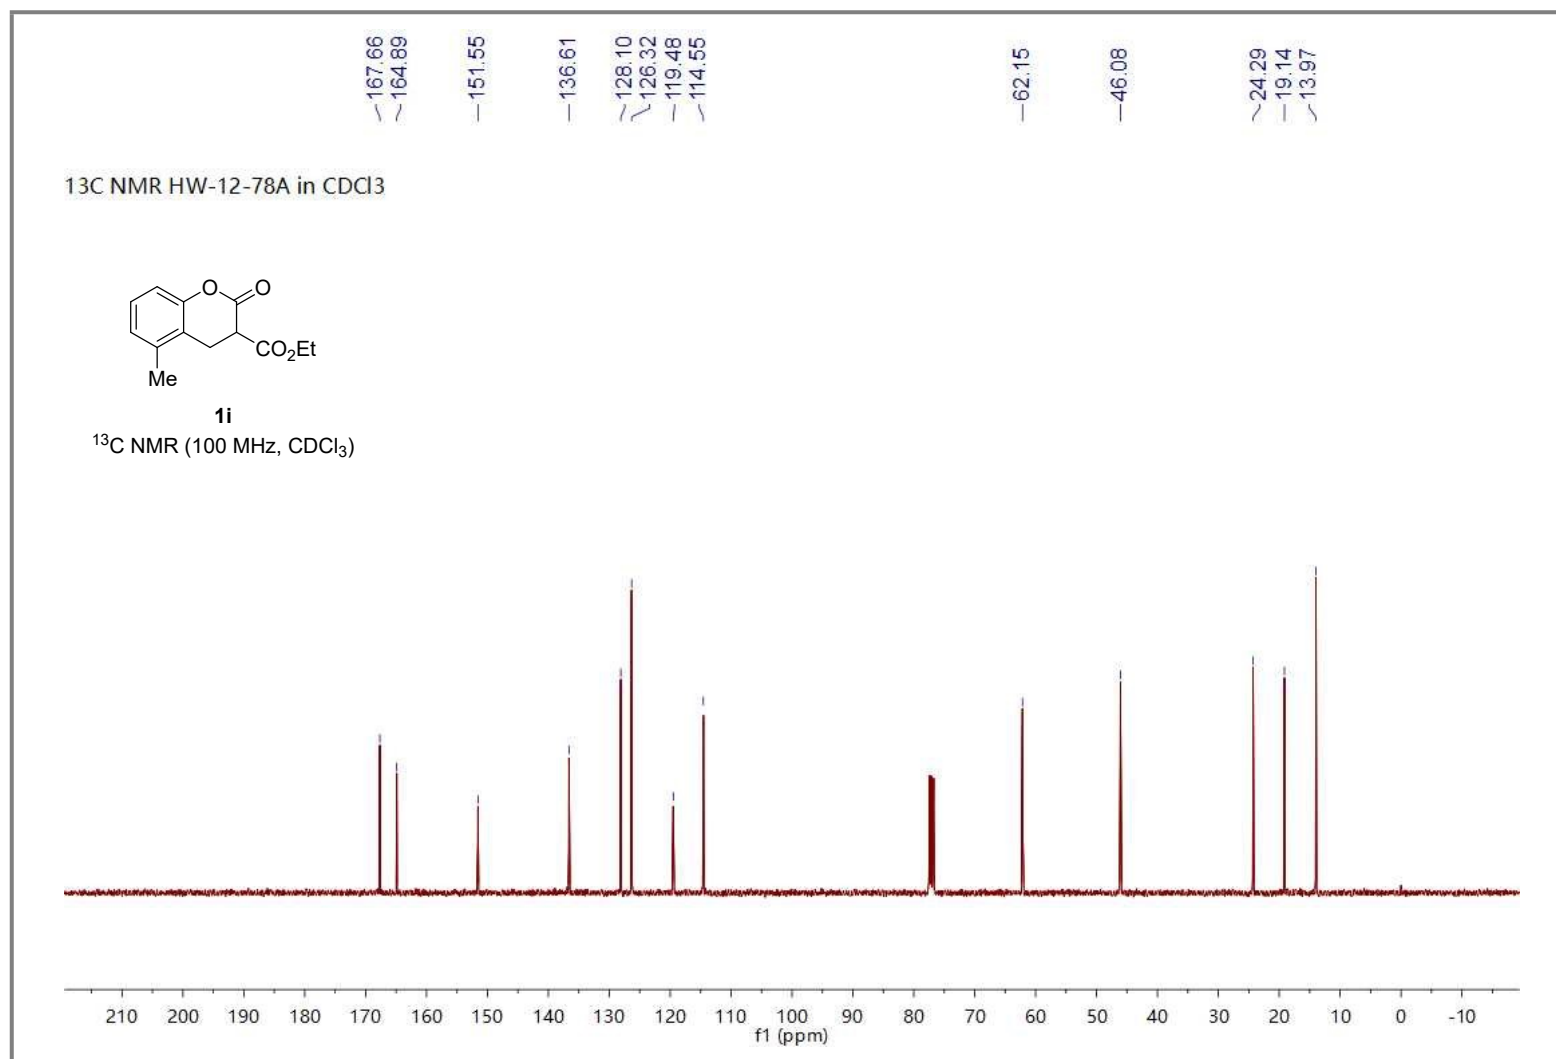

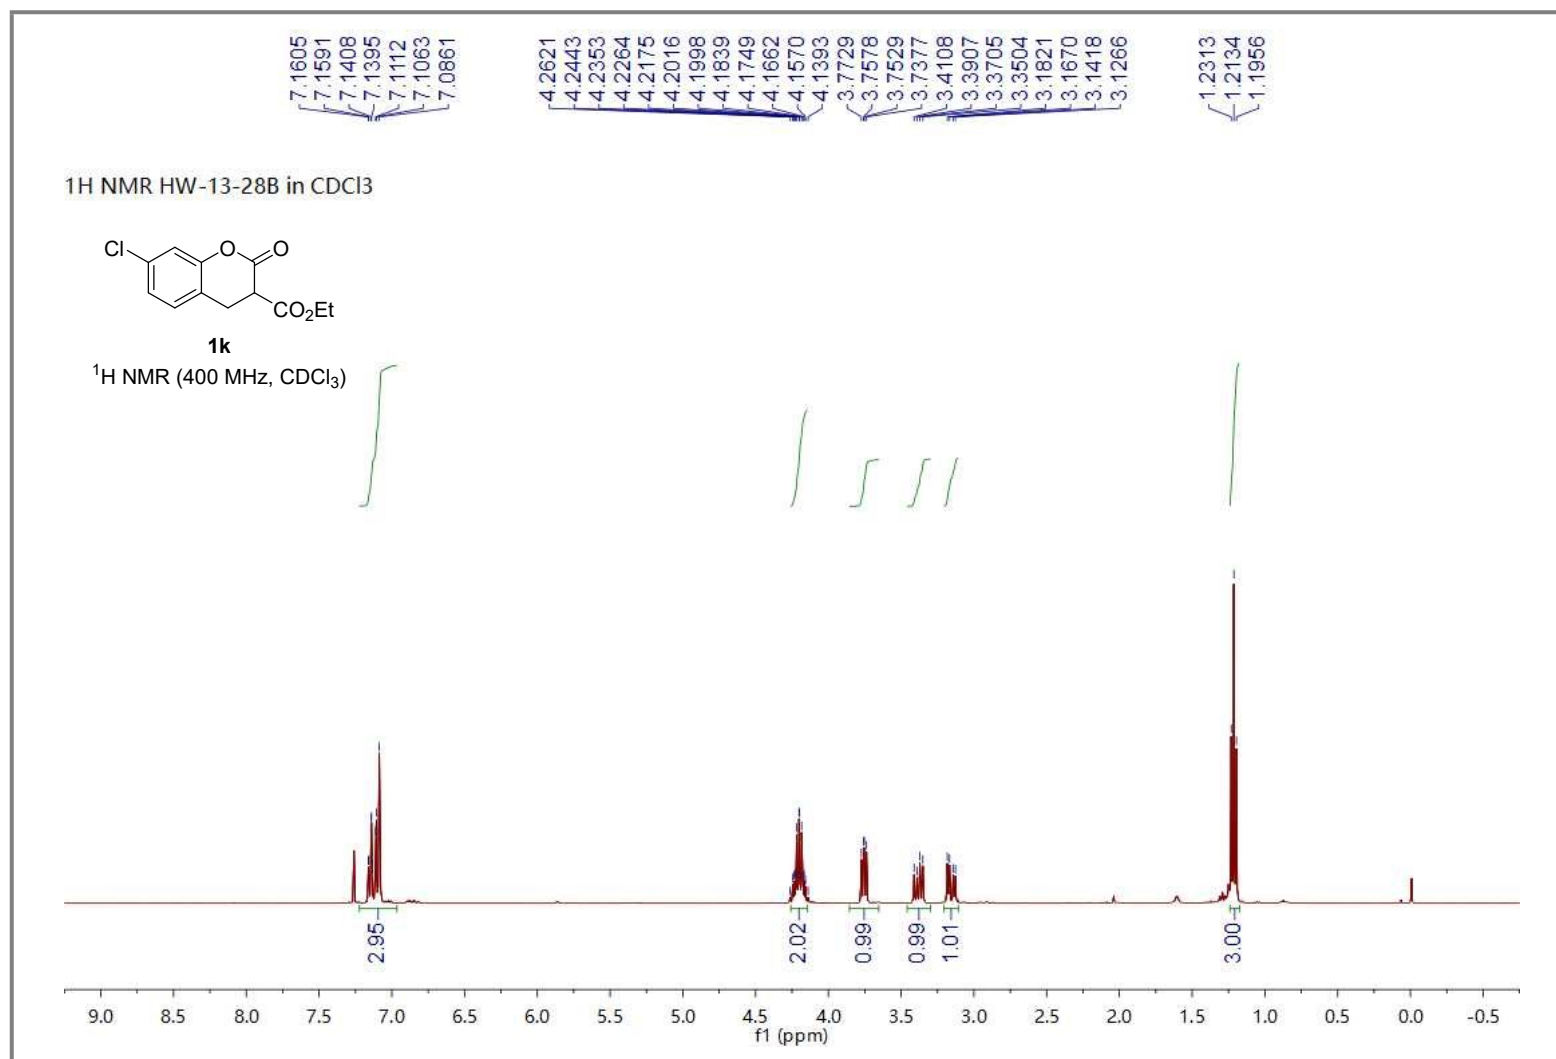

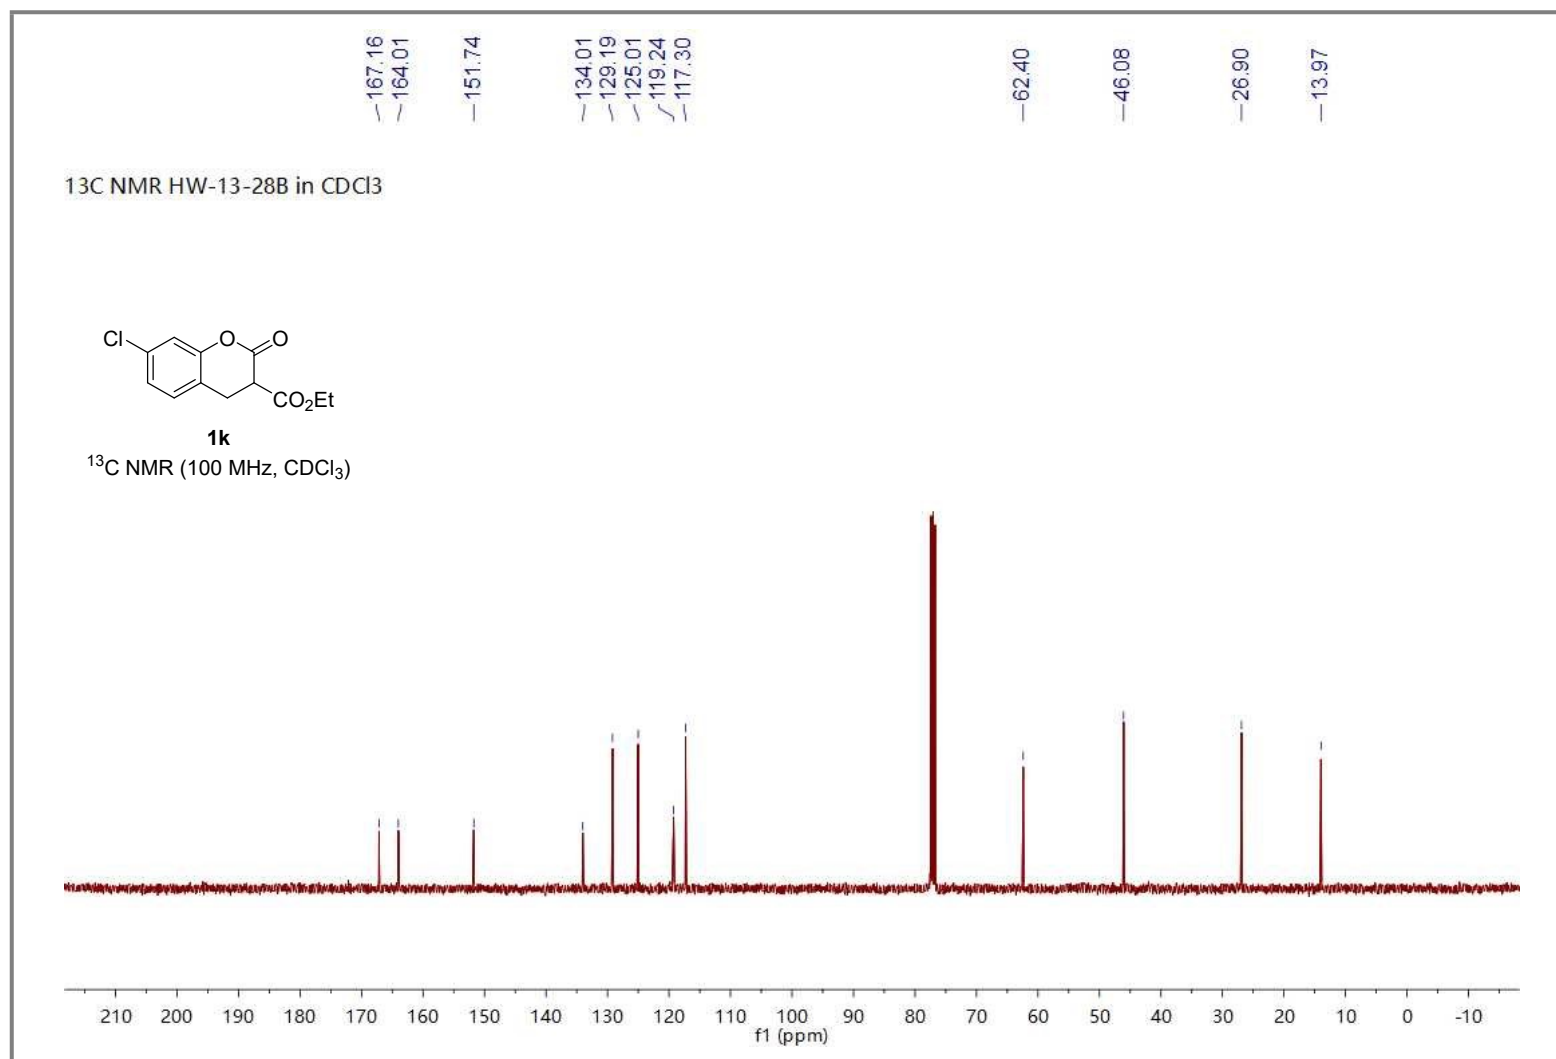



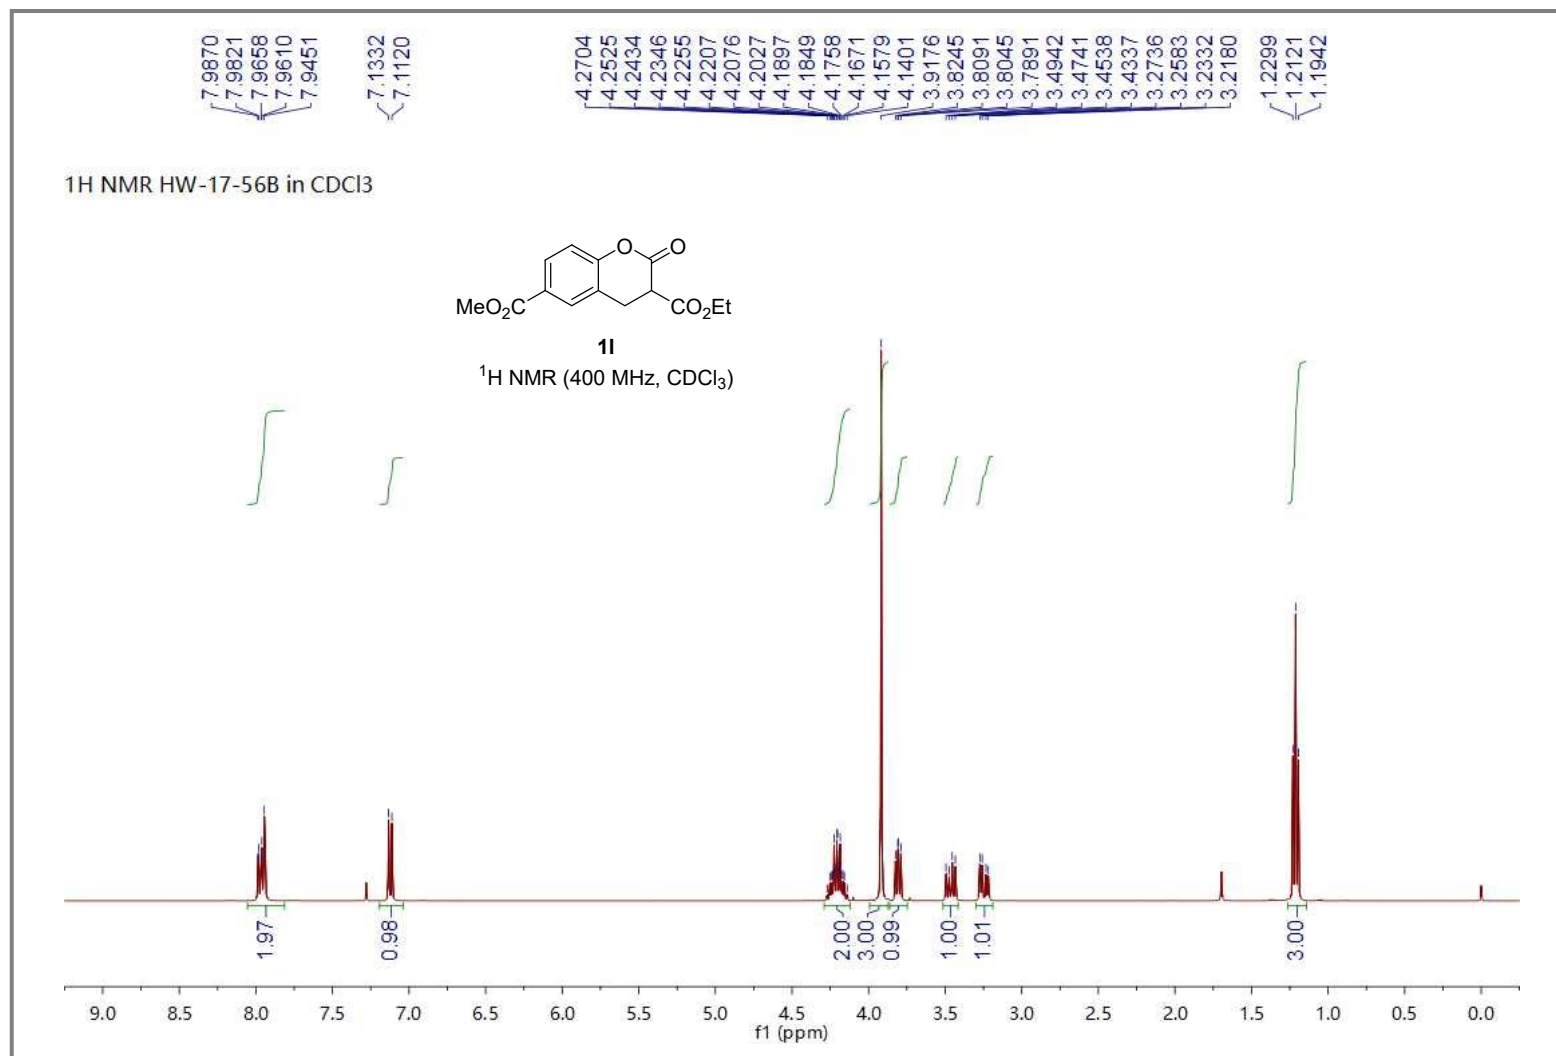

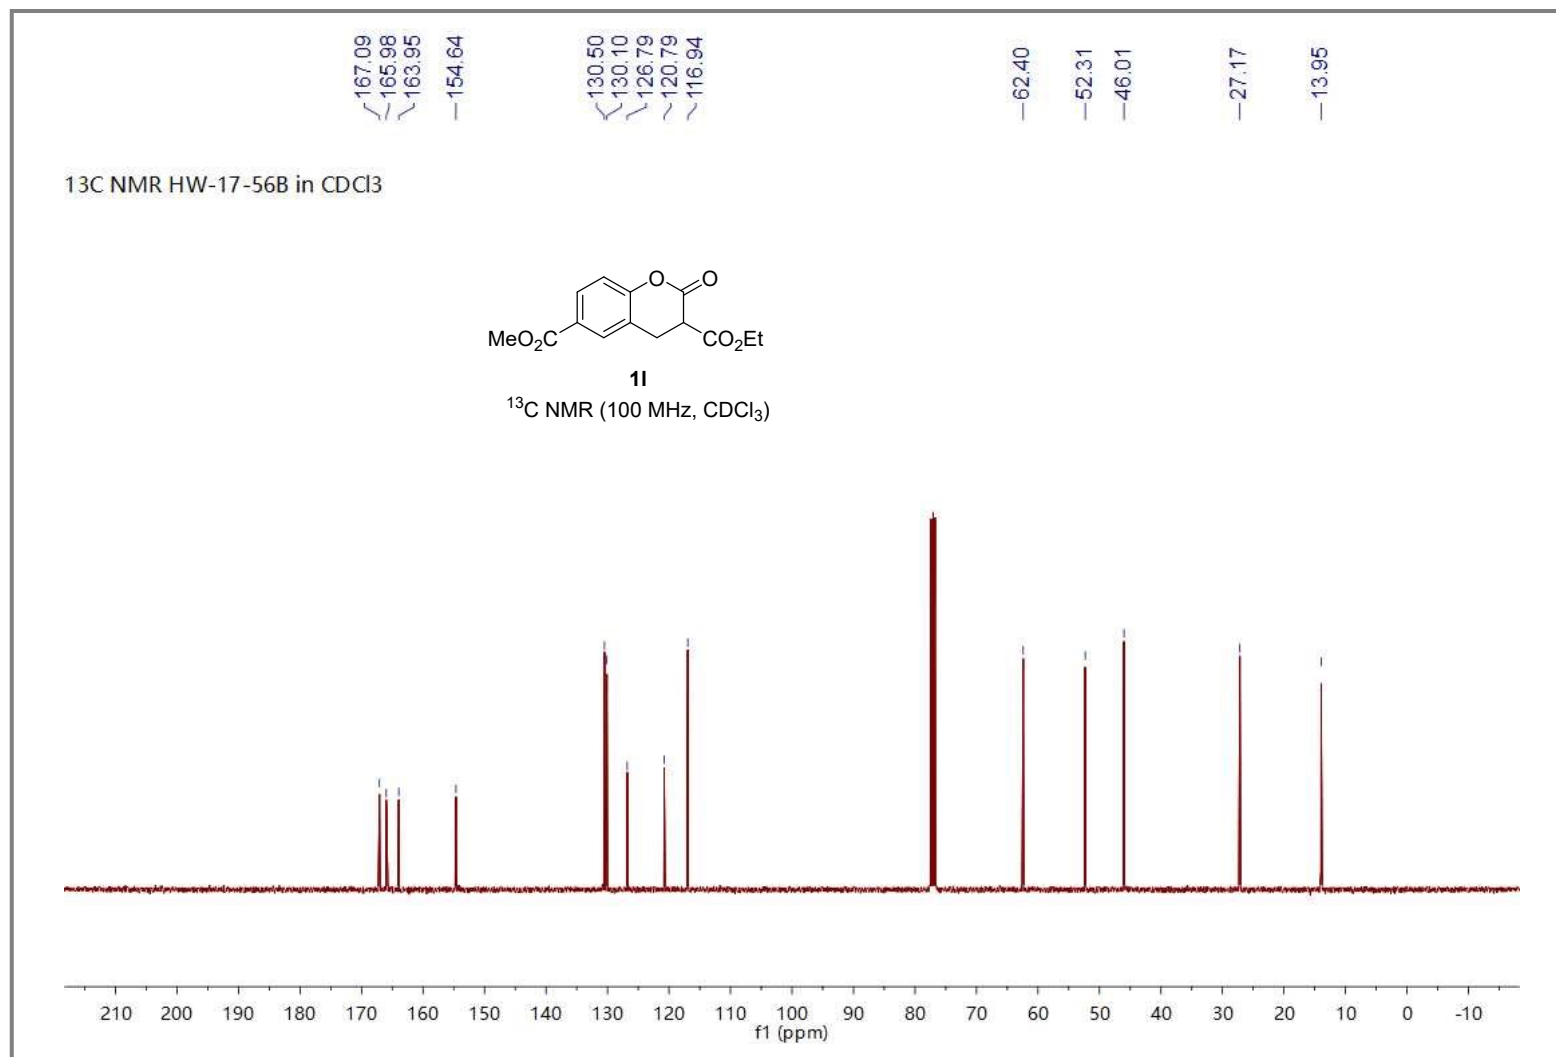

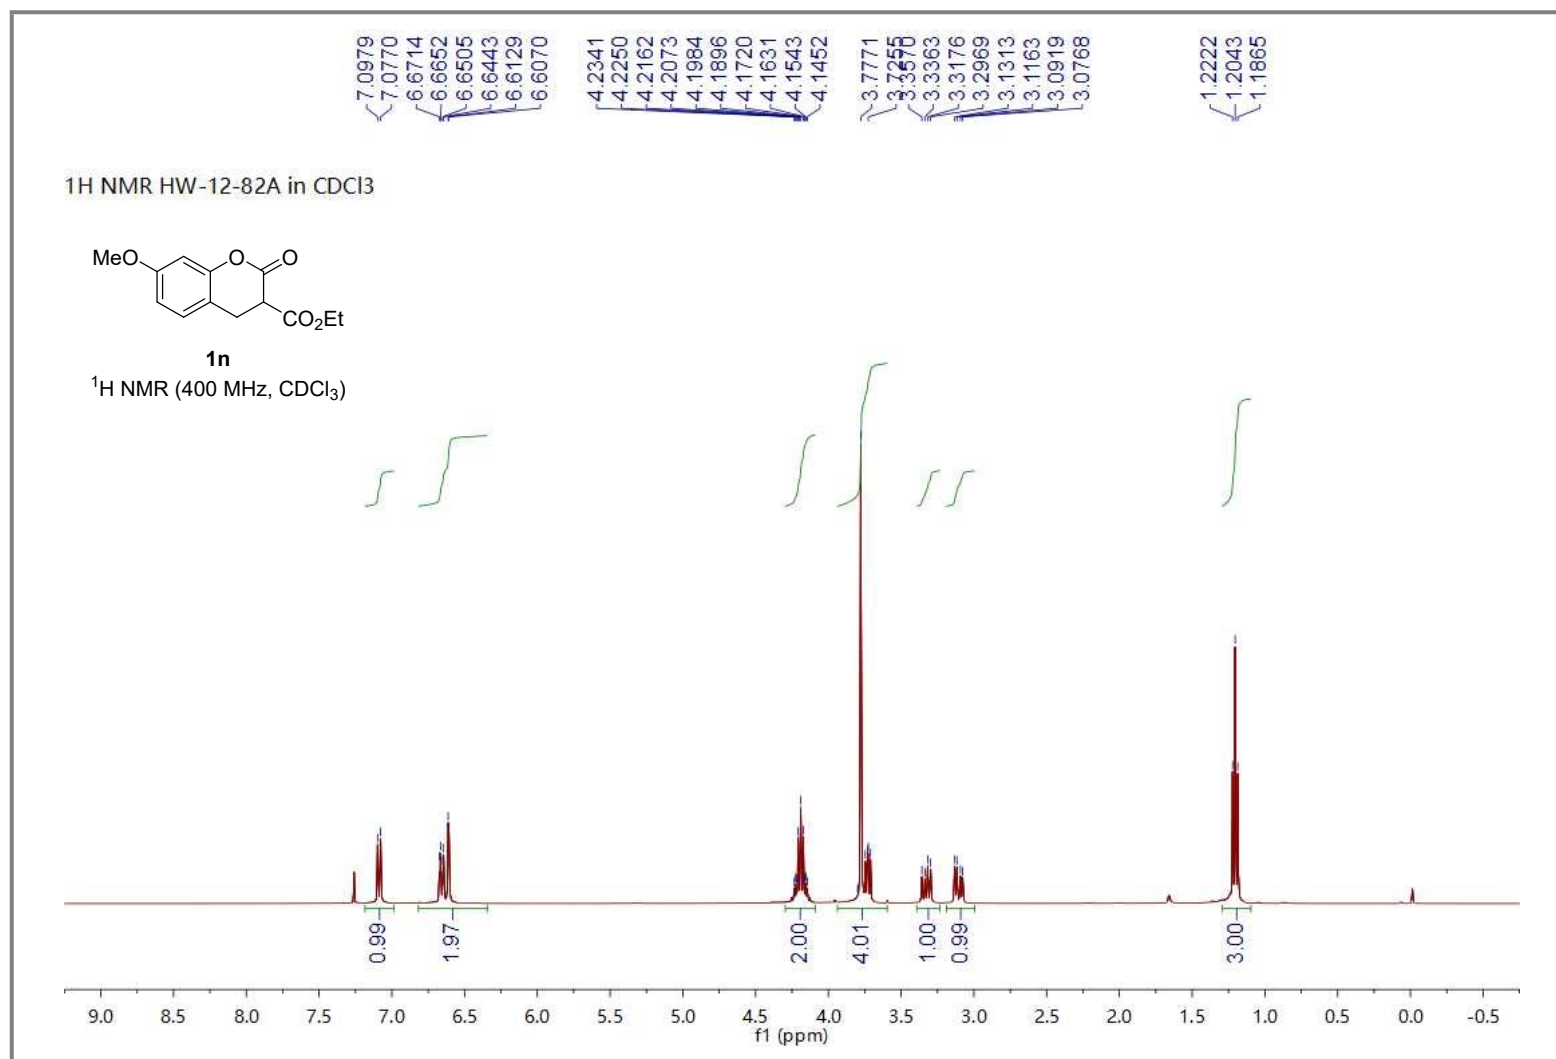

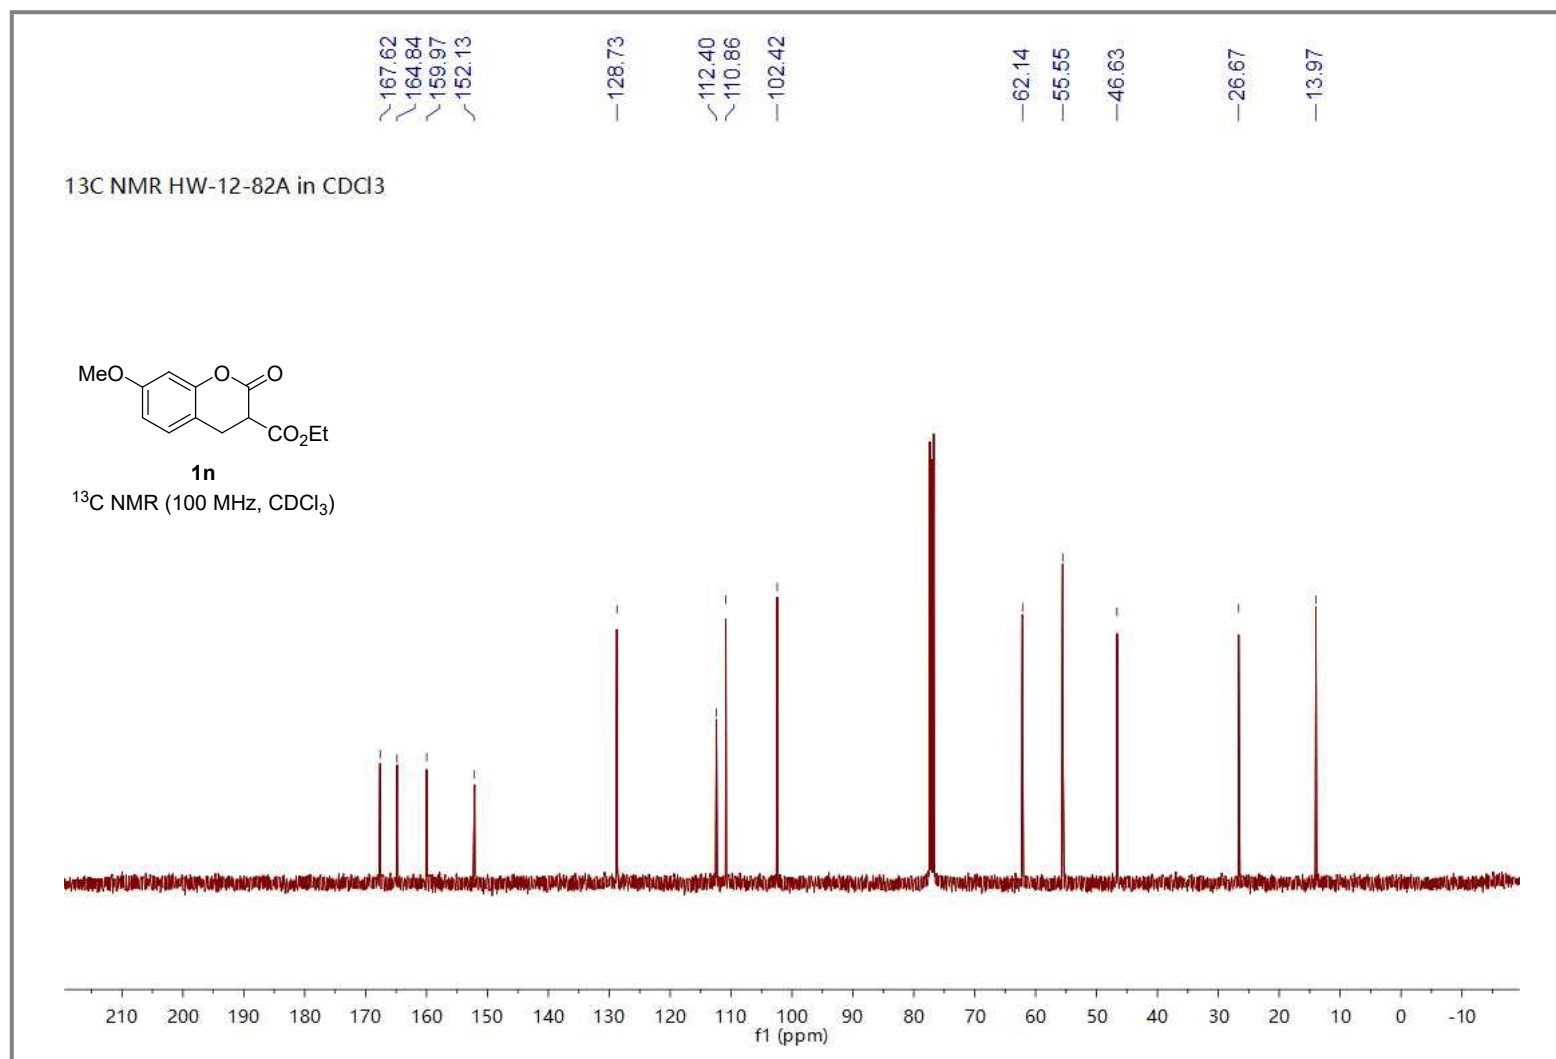

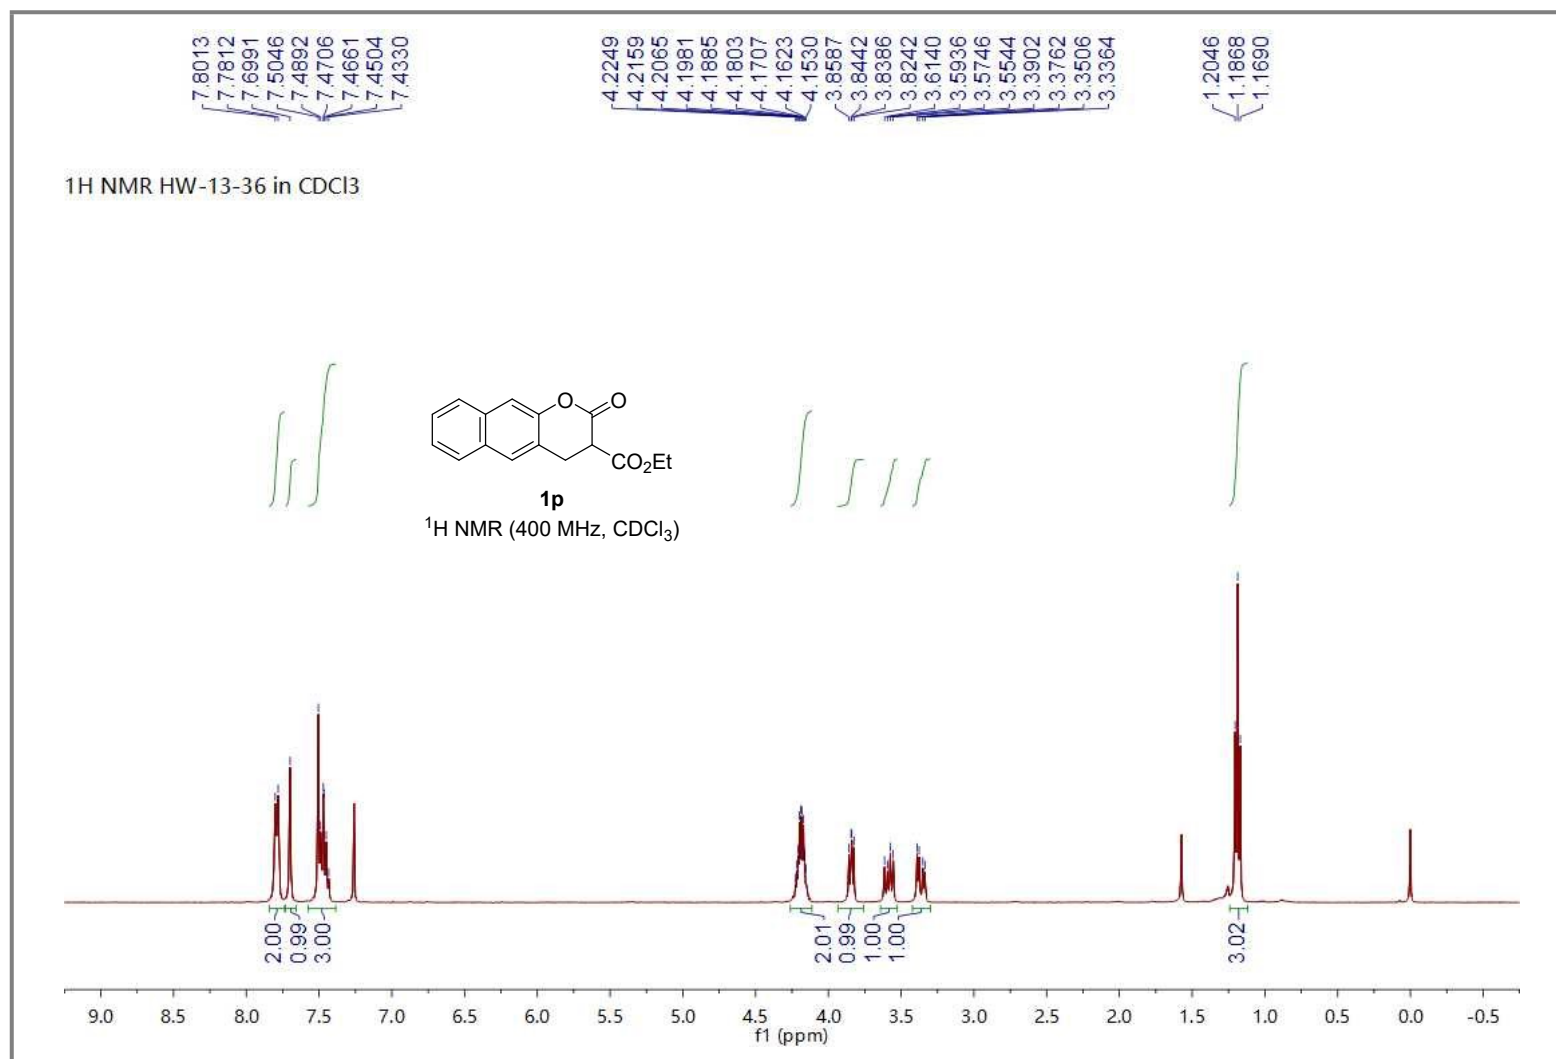

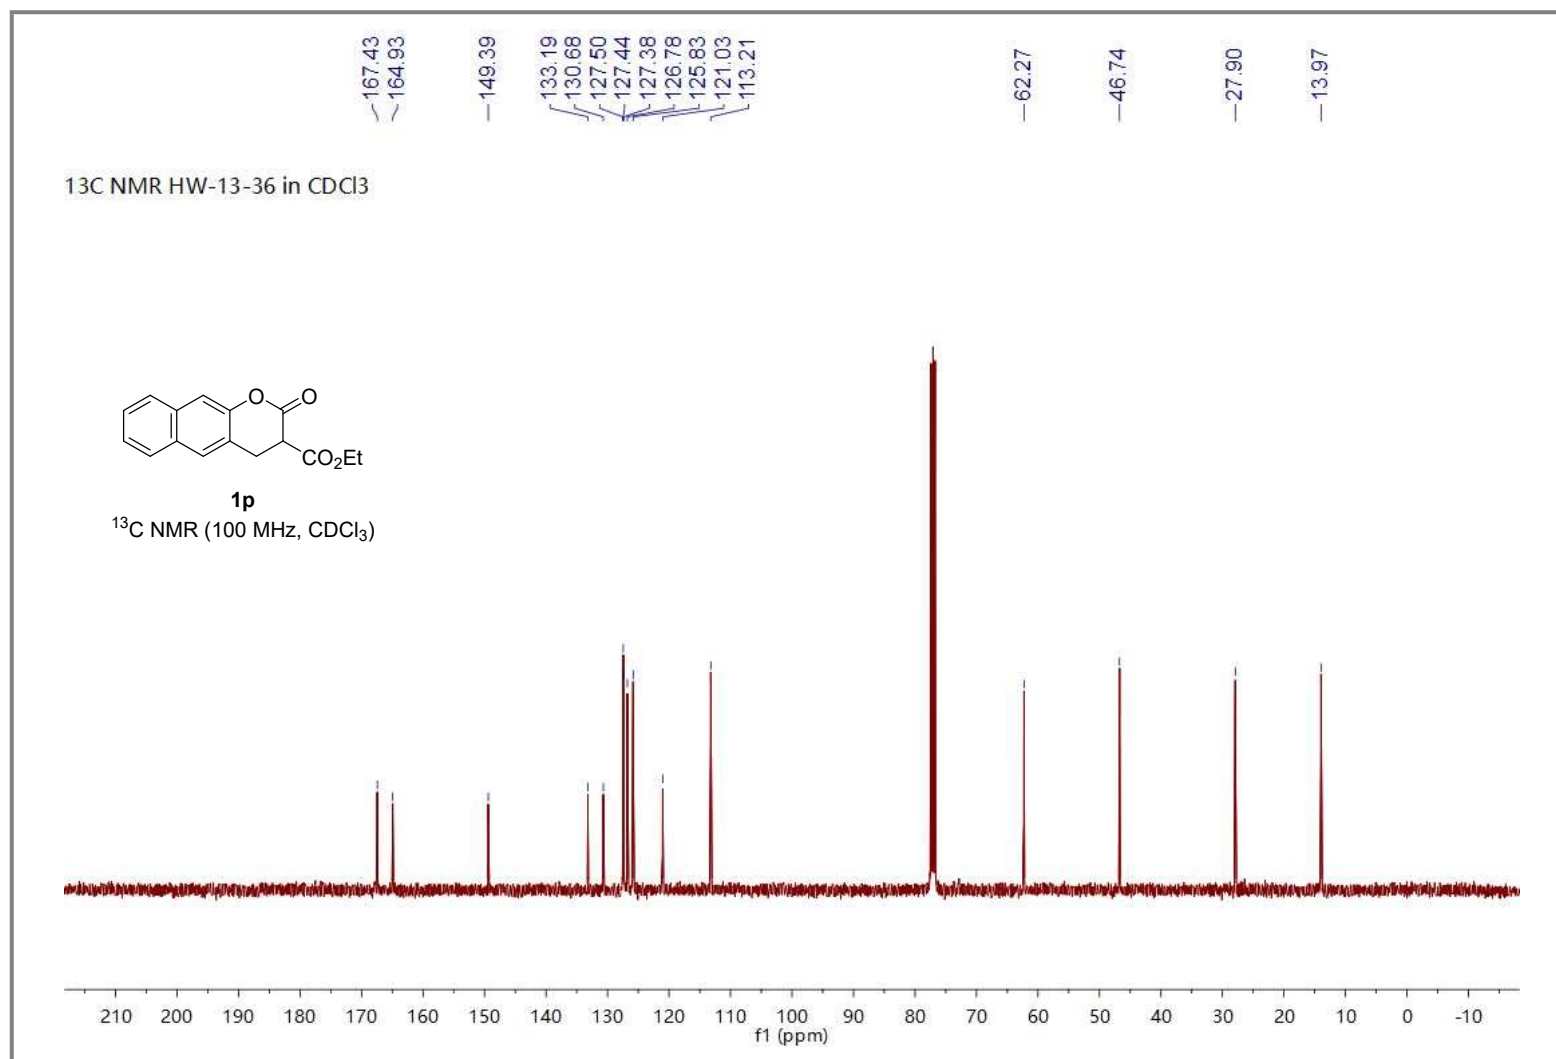

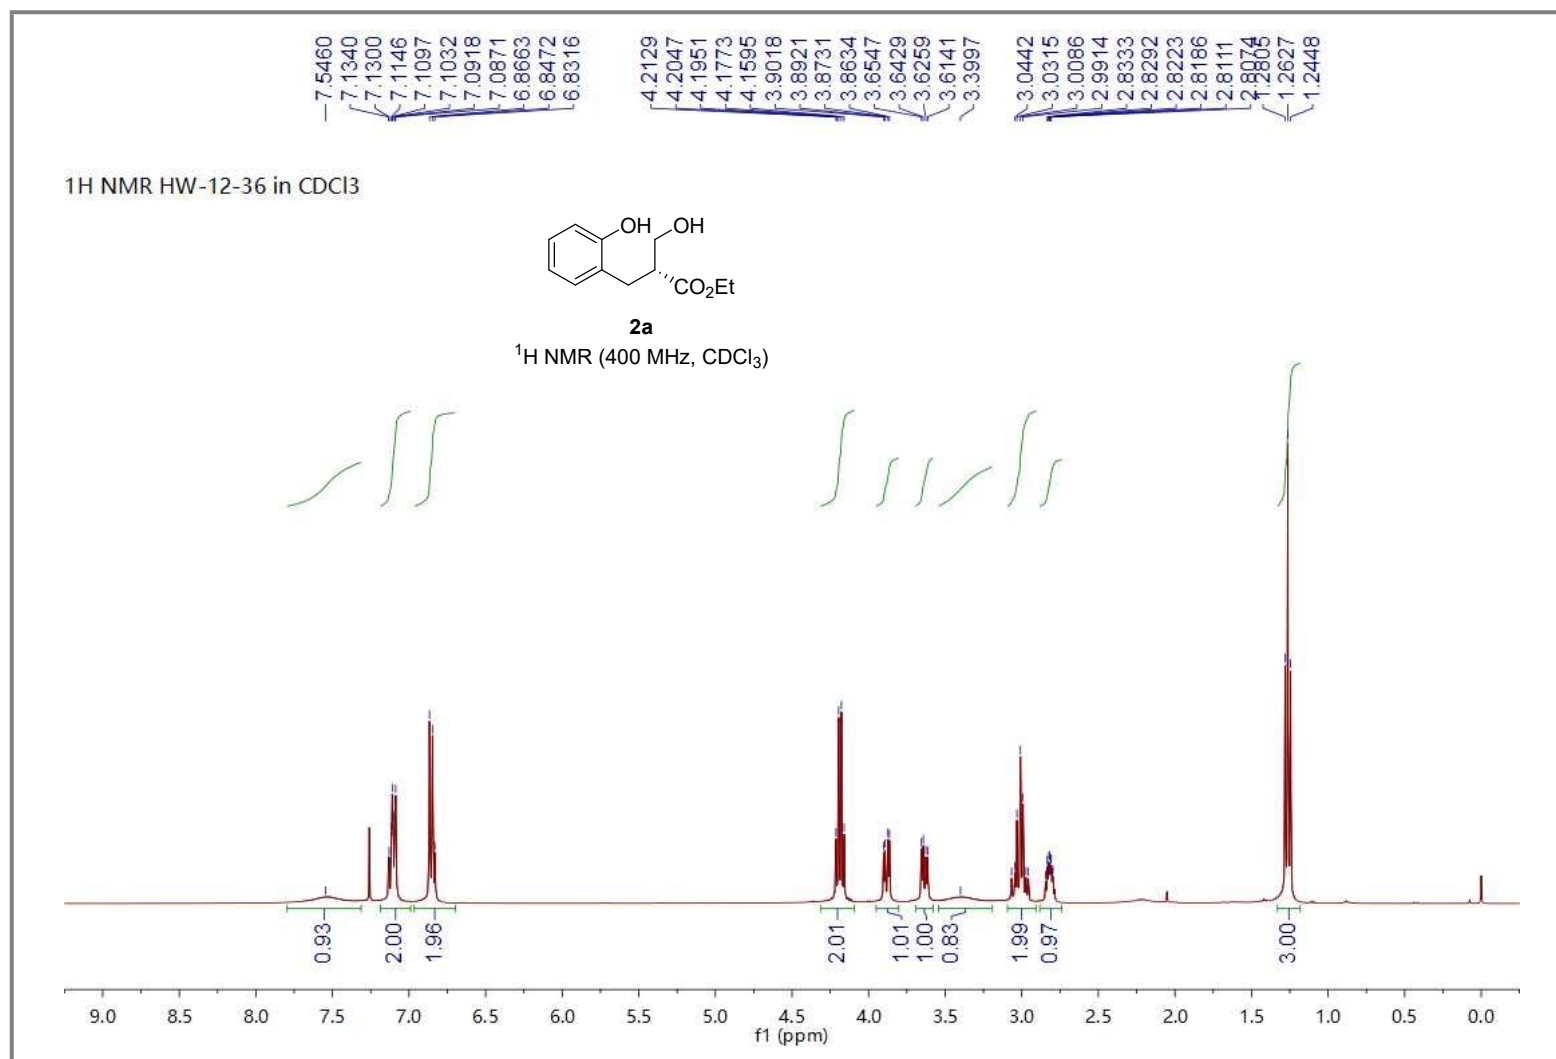

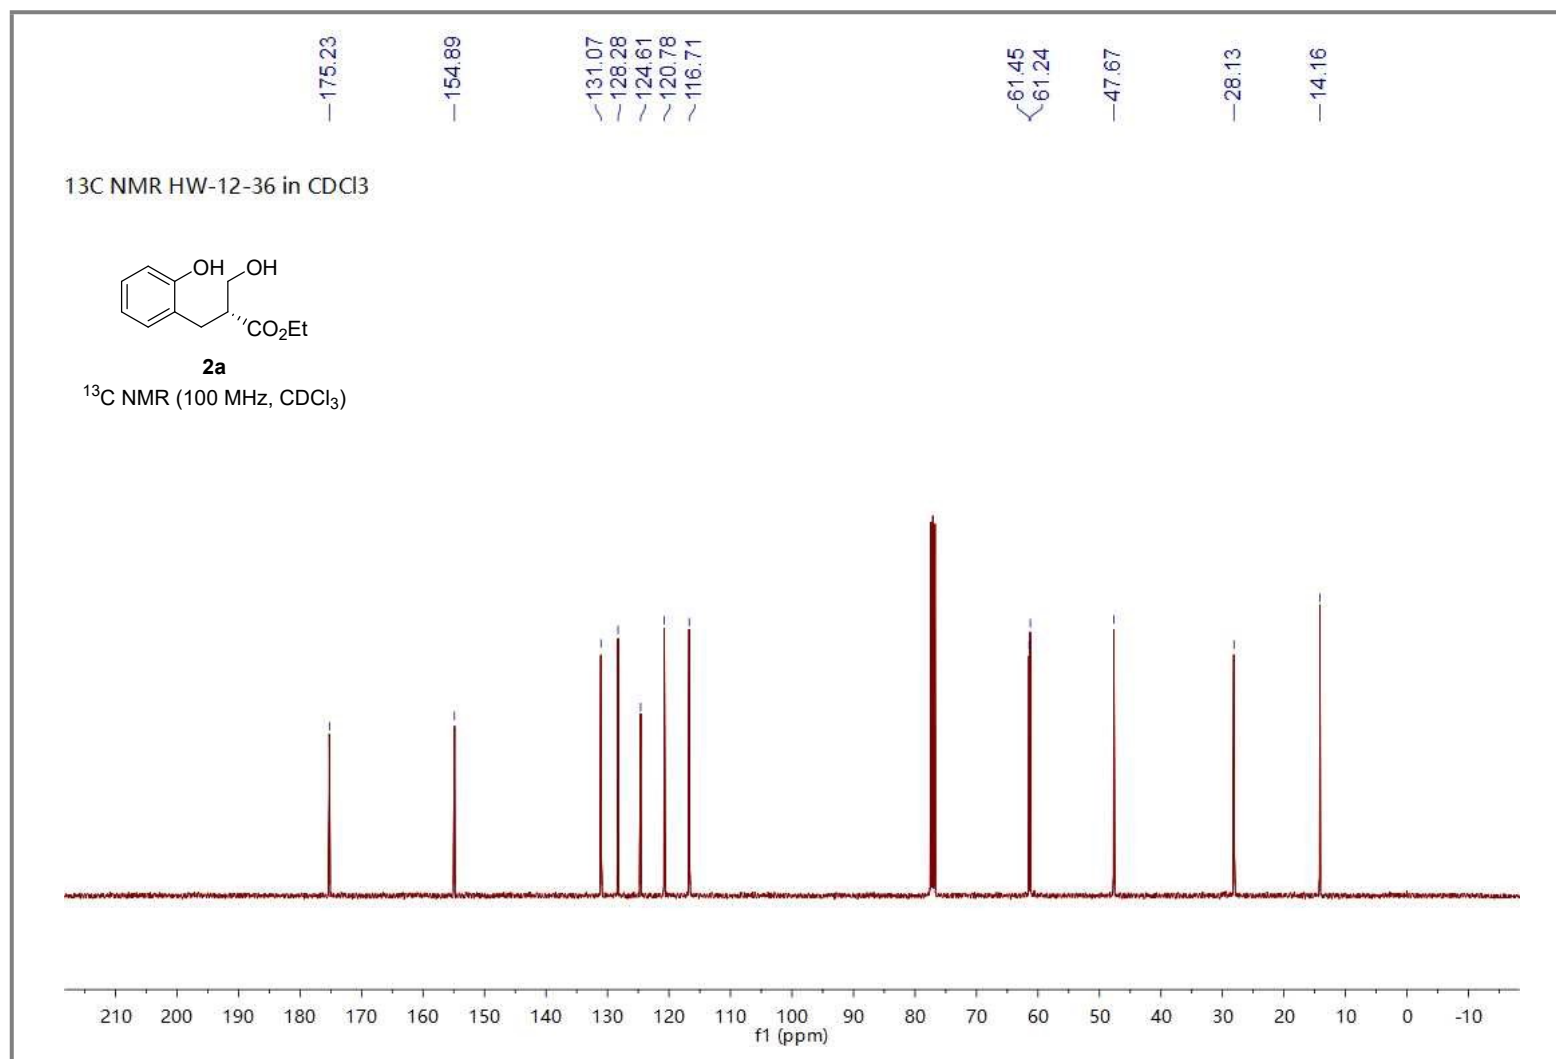



Data File C:\USERS\PUBLIC\DOCUMENTS\CHEMSTATION\1\DATA\2021\YZH001126 19-54-53.D  
 Sample Name: HW-10-27+/-

```

=====
Acq. Operator   : SYSTEM
Sample Operator : SYSTEM
Acq. Instrument : HPLC1260 II           Location : 1
Injection Date  : 12/23/2021 7:54:53 PM Inj       : 1
                                           Inj Volume: No inj
Acq. Method    : C:\USERS\PUBLIC\DOCUMENTS\CHEMSTATION\1\METHODS\def_LC1.M
Last changed   : 12/23/2021 7:19:09 PM by SYSTEM
               (modified after loading)
Analysis Method : C:\USERS\PUBLIC\DOCUMENTS\CHEMSTATION\1\METHODS\def_LC1.M
Last changed   : 10/17/2023 10:24:47 AM by SYSTEM
               (modified after loading)
Sample Info    : AS-H, Hexane/1-PrOH = 90/10, 0.8 mL/min, 30 oC, 230 nm
  
```

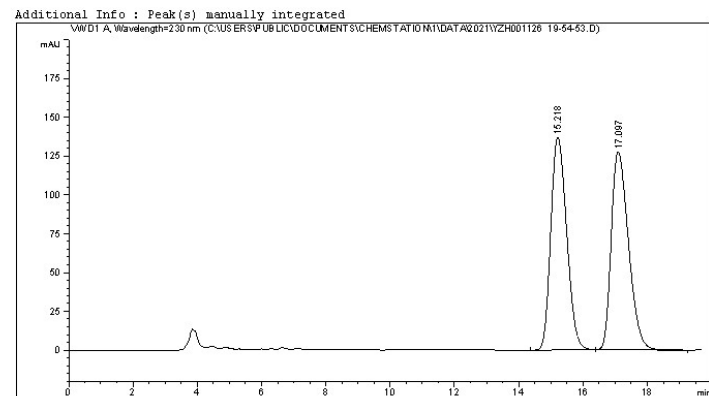

Area Percent Report

```

Sorted By      : Signal
Multiplier    : 1.0000
Dilution      : 1.0000
Do not use Multiplier & Dilution Factor with ISTDs
  
```

Signal 1: VWD1 A, Wavelength=230 nm

| Peak # | RetTime [min] | Type | Width [min] | Area [mAU*s] | Height [mAU] | Area %  |
|--------|---------------|------|-------------|--------------|--------------|---------|
| 1      | 15.218        | BB   | 0.5413      | 4693.18555   | 137.10939    | 49.8009 |
| 2      | 17.097        | BB   | 0.5803      | 4730.71143   | 127.37619    | 50.1991 |

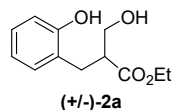

Data File C:\USERS\PUBLIC\DOCUMENTS\CHEMSTATION\1\DATA\2022\YZH002566 20-01-01.D  
 Sample Name: HW-12-36

```

=====
Acq. Operator   : SYSTEM
Sample Operator : SYSTEM
Acq. Instrument : HPLC1260 II           Location : 1
Injection Date  : 10/21/2022 8:01:02 PM Inj       : 1
                                           Inj Volume: No inj
Acq. Method    : C:\USERS\PUBLIC\DOCUMENTS\CHEMSTATION\1\METHODS\def_LC1.M
Last changed   : 10/21/2022 7:49:42 PM by SYSTEM
               (modified after loading)
Analysis Method : C:\USERS\PUBLIC\DOCUMENTS\CHEMSTATION\1\METHODS\def_LC1.M
Last changed   : 10/17/2023 10:26:34 AM by SYSTEM
               (modified after loading)
Sample Info    : AS-H, Hexane/1-PrOH = 90/10, 0.8 mL/min, 30 oC, 230 nm
  
```

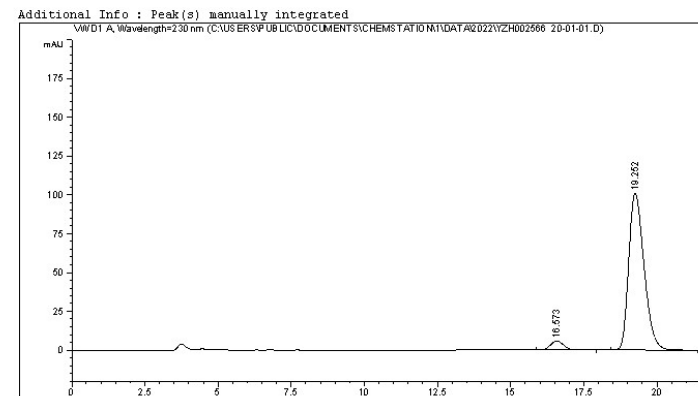

Area Percent Report

```

Sorted By      : Signal
Multiplier    : 1.0000
Dilution      : 1.0000
Do not use Multiplier & Dilution Factor with ISTDs
  
```

Signal 1: VWD1 A, Wavelength=230 nm

| Peak # | RetTime [min] | Type | Width [min] | Area [mAU*s] | Height [mAU] | Area %  |
|--------|---------------|------|-------------|--------------|--------------|---------|
| 1      | 16.573        | BB   | 0.4750      | 181.65741    | 5.90364      | 4.7155  |
| 2      | 19.252        | BB   | 0.5613      | 3670.72803   | 101.16671    | 95.2845 |

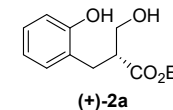

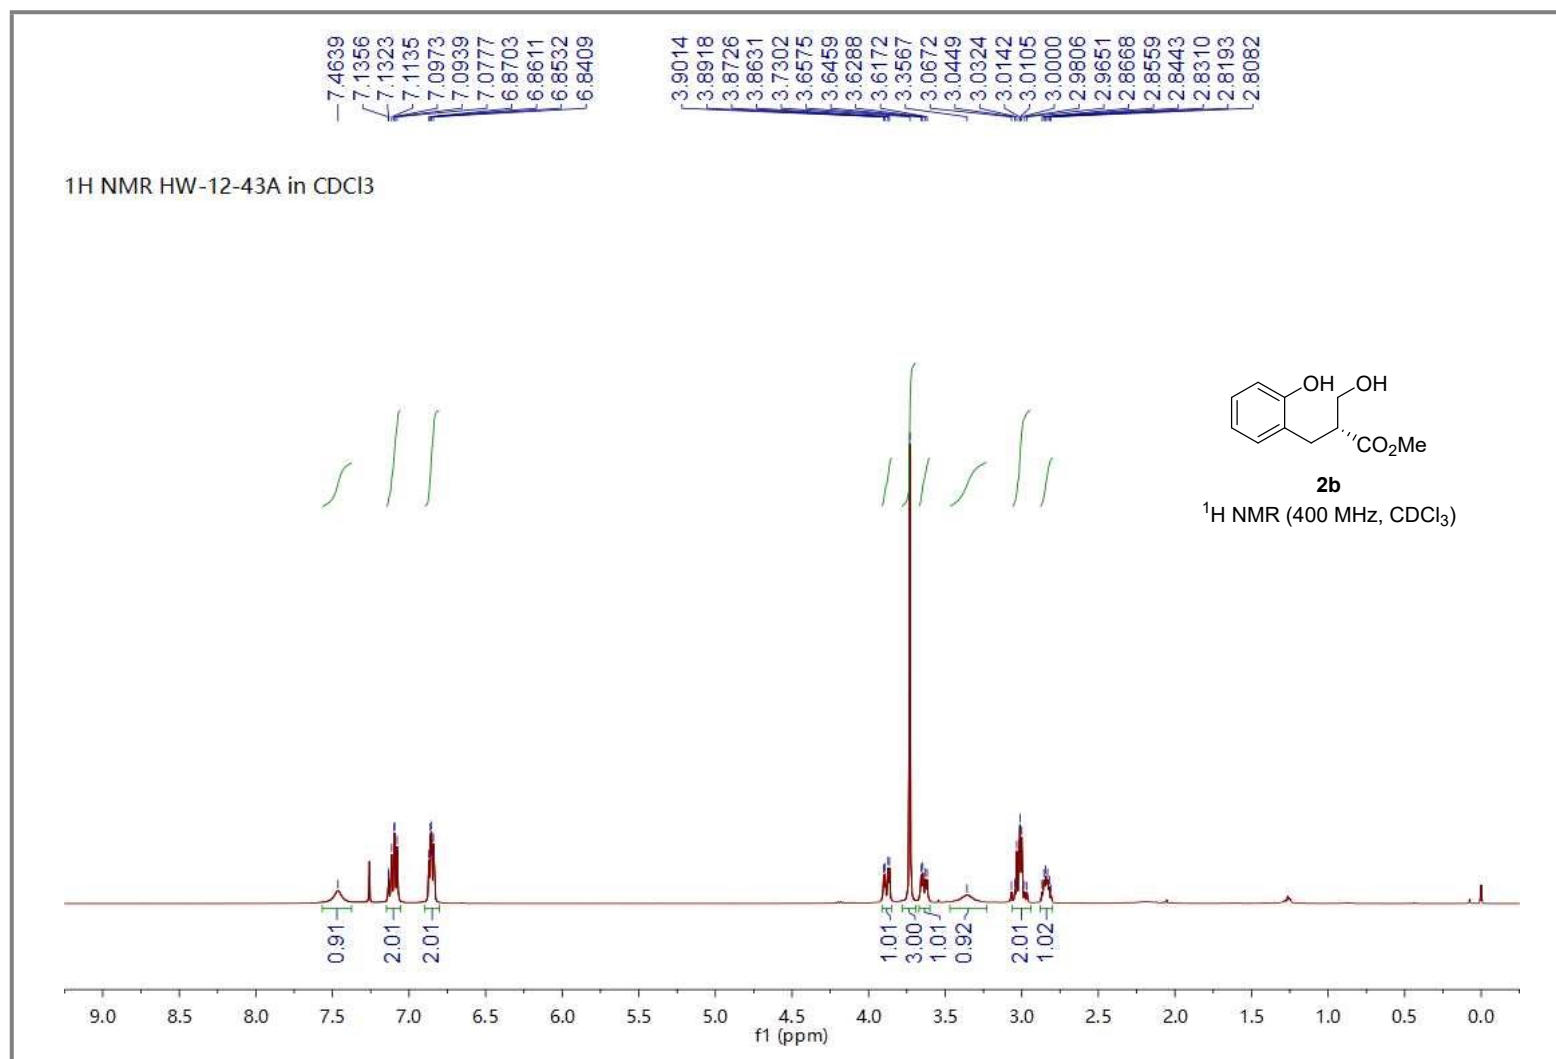

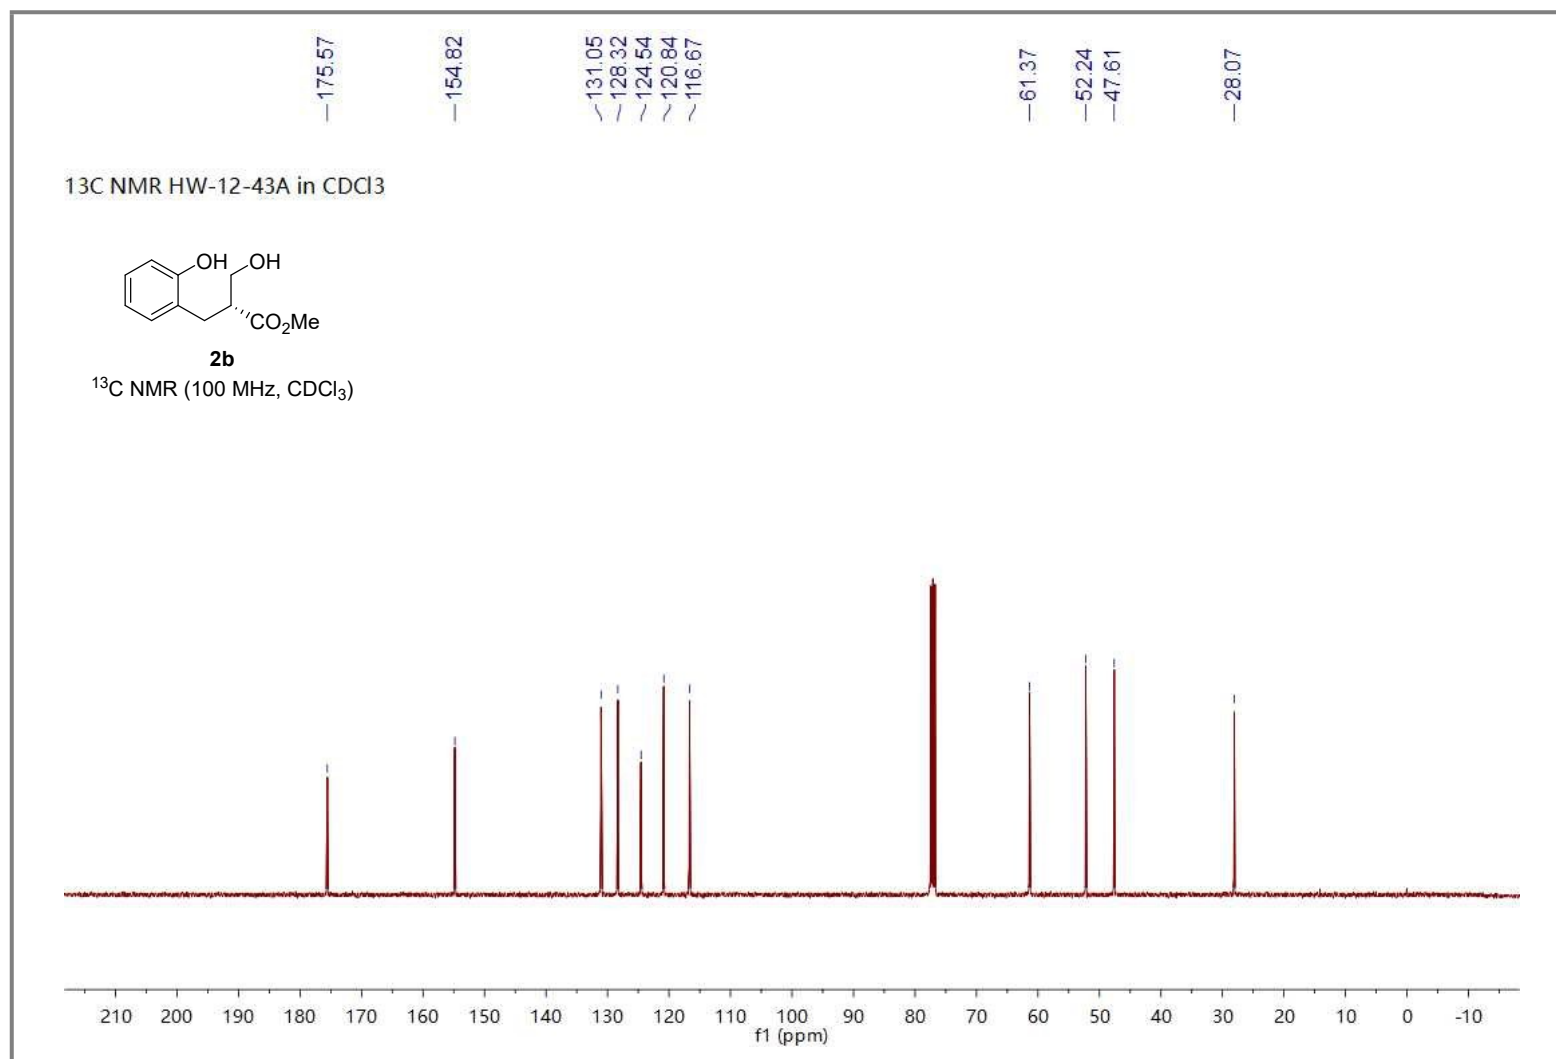

Data File C:\USERS\PUBLIC\DOCUMENTS\CHEMSTATION\1\DATA\2022\YZH002669 10-08-05.D  
 Sample Name: HW-12-43A+/-

```

=====
Acq. Operator   : SYSTEM
Sample Operator : SYSTEM
Acq. Instrument : HPLC1260 II           Location : 1
Injection Date  : 10/31/2022 10:08:06 AM Inj       : 1
                                           Inj Volume : No inj
Acq. Method     : C:\USERS\PUBLIC\DOCUMENTS\CHEMSTATION\1\METHODS\def_LC1.M
Last changed    : 10/31/2022 9:54:39 AM by SYSTEM
                 (modified after loading)
Analysis Method : C:\USERS\PUBLIC\DOCUMENTS\CHEMSTATION\1\METHODS\def_LC1.M
Last changed    : 10/17/2023 10:28:02 AM by SYSTEM
                 (modified after loading)
Sample Info     : IB, Hexane/i-PrOH = 90/10, 0.8 mL/min, 30 oC, 230 nm
  
```

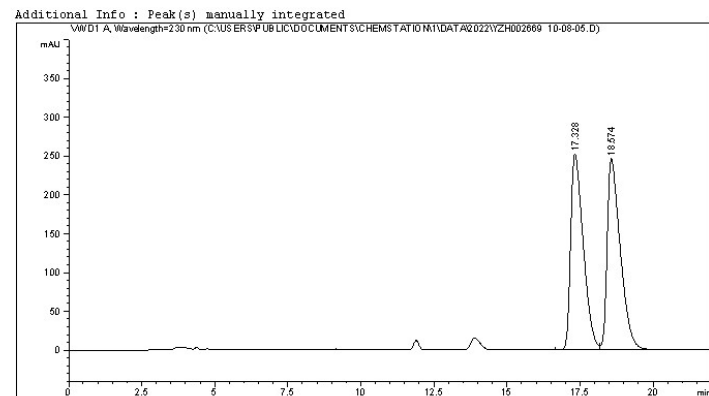

Area Percent Report

```

Sorted By      : Signal
Multiplier     : 1.0000
Dilution       : 1.0000
Do not use Multiplier & Dilution Factor with ISTDs
  
```

Signal 1: VWD1 A, Wavelength=230 nm

| Peak # | RetTime [min] | Type | Width [min] | Area [mAU*s] | Height [mAU] | Area %  |
|--------|---------------|------|-------------|--------------|--------------|---------|
| 1      | 17.328        | BV   | 0.4606      | 7565.42383   | 252.47827    | 49.4359 |
| 2      | 18.574        | VB   | 0.4692      | 7738.06689   | 246.54932    | 50.5641 |

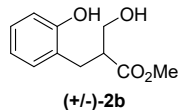

Data File C:\USERS\PUBLIC\DOCUMENTS\CHEMSTATION\1\DATA\2022\YZH002670 10-40-03.D  
 Sample Name: HW-12-43A

```

=====
Acq. Operator   : SYSTEM
Sample Operator : SYSTEM
Acq. Instrument : HPLC1260 II           Location : 1
Injection Date  : 10/31/2022 10:40:03 AM Inj       : 1
                                           Inj Volume : No inj
Acq. Method     : C:\USERS\PUBLIC\DOCUMENTS\CHEMSTATION\1\METHODS\def_LC1.M
Last changed    : 10/31/2022 9:54:39 AM by SYSTEM
                 (modified after loading)
Analysis Method : C:\USERS\PUBLIC\DOCUMENTS\CHEMSTATION\1\METHODS\def_LC1.M
Last changed    : 10/17/2023 10:28:02 AM by SYSTEM
                 (modified after loading)
Sample Info     : IB, Hexane/i-PrOH = 90/10, 0.8 mL/min, 30 oC, 230 nm
  
```

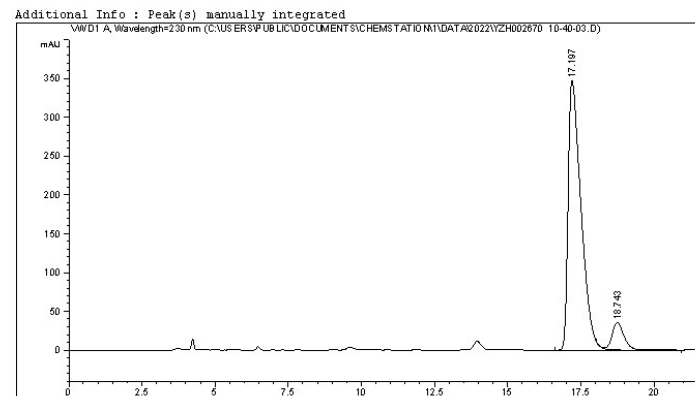

Area Percent Report

```

Sorted By      : Signal
Multiplier     : 1.0000
Dilution       : 1.0000
Do not use Multiplier & Dilution Factor with ISTDs
  
```

Signal 1: VWD1 A, Wavelength=230 nm

| Peak # | RetTime [min] | Type | Width [min] | Area [mAU*s] | Height [mAU] | Area %  |
|--------|---------------|------|-------------|--------------|--------------|---------|
| 1      | 17.197        | BV R | 0.4631      | 1.06331e4    | 347.43600    | 91.3184 |
| 2      | 18.743        | VB E | 0.4324      | 1010.87579   | 35.37531     | 8.6816  |

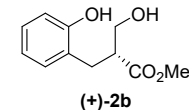

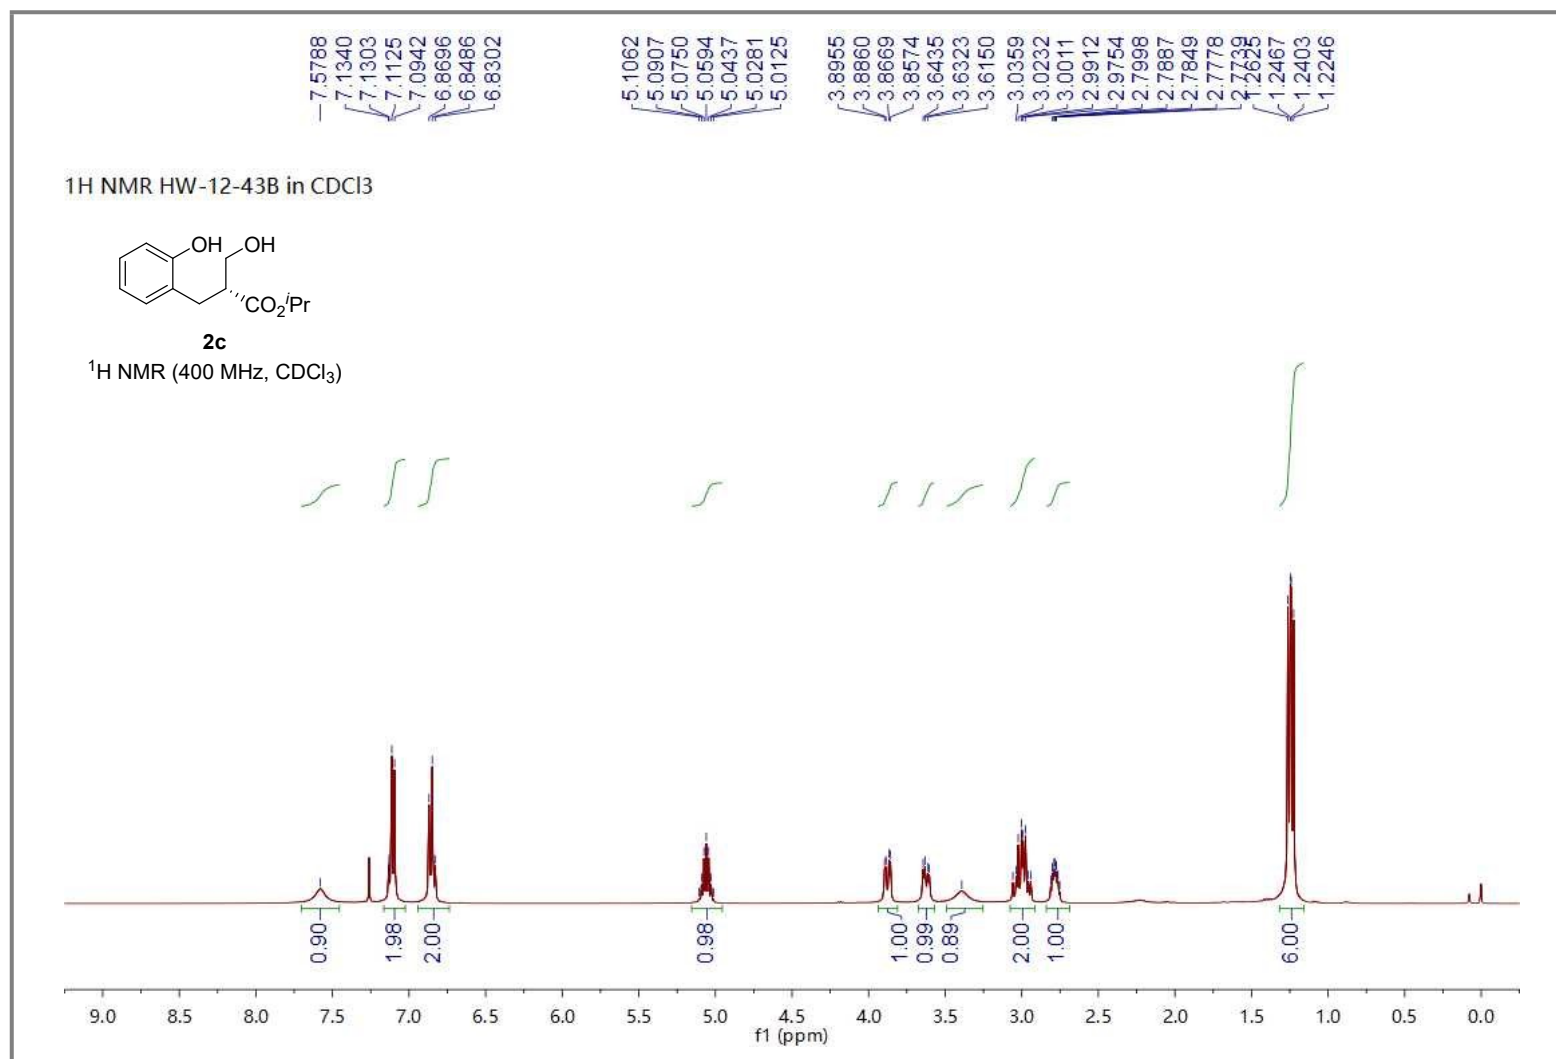

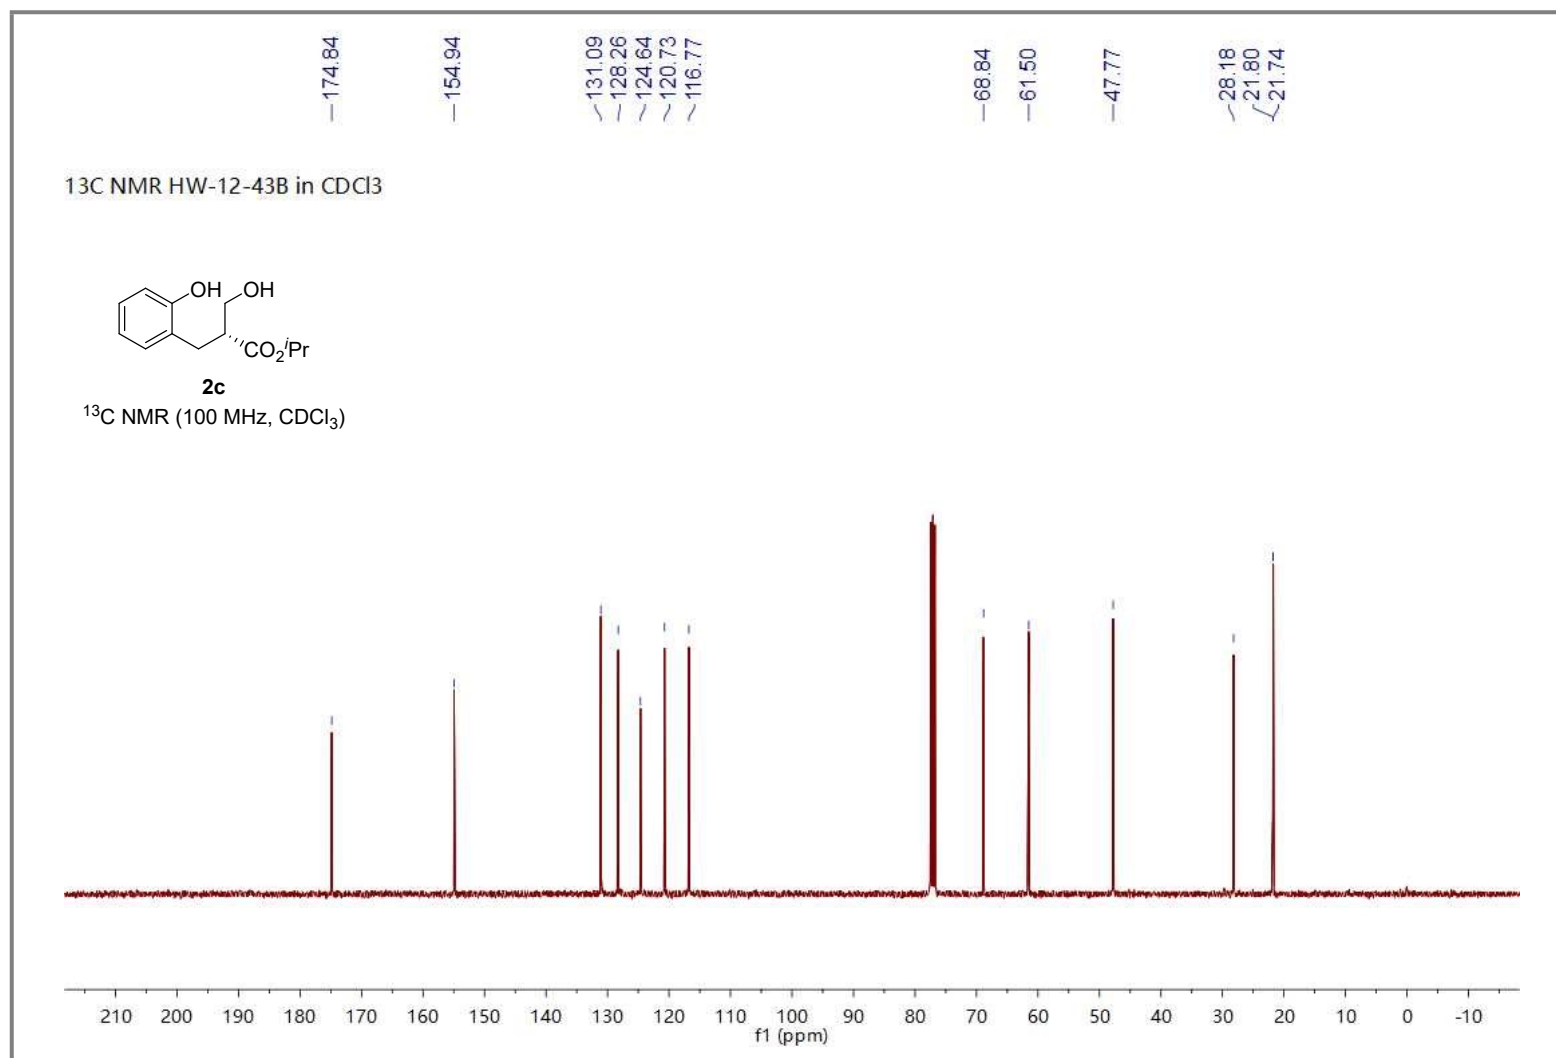

Data File C:\CHEM32\1\DATA\ZHOU-22\YZN021922.D  
 Sample Name: HW-12-43B+/-

=====  
 Acq. Operator :  
 Acq. Instrument : Instrument 1 Location : -  
 Injection Date : 10/30/2022 10:20:46 PM  
 Acq. Method : C:\CHEM32\1\METHODS\DEF\_LC.M  
 Last changed : 10/30/2022 10:20:15 PM  
 (modified after loading)  
 Analysis Method : C:\CHEM32\1\METHODS\DEF\_LC.M  
 Last changed : 10/17/2023 10:18:18 PM  
 (modified after loading)  
 Sample Info : AS-H, Hexane/i-PrOH = 90/10, 0.8 mL/min, 30 oC, 230 nm

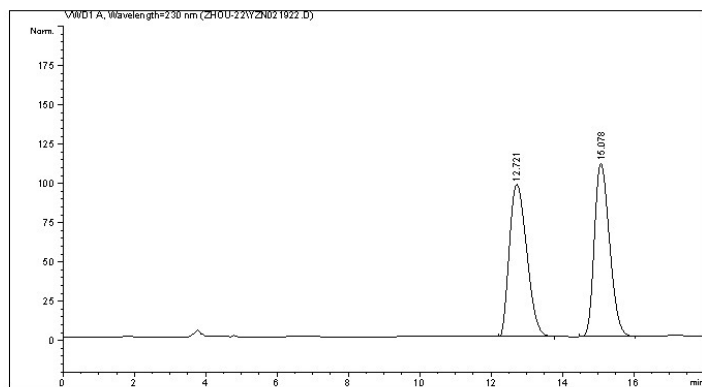

=====  
 Area Percent Report  
 =====

Sorted By : Signal  
 Multiplier: : 1.0000  
 Dilution: : 1.0000  
 Use Multiplier & Dilution Factor with ISTDs

Signal 1: VWD1 A, Wavelength=230 nm

| Peak # | RetTime [min] | Type | Width [min] | Area [mAU] | Height [mAU] | Area %  |
|--------|---------------|------|-------------|------------|--------------|---------|
| 1      | 12.721        | BB   | 0.5415      | 3272.87427 | 96.79517     | 50.1478 |
| 2      | 15.078        | BB   | 0.4621      | 3253.57910 | 110.28246    | 49.8522 |

Totals : 6526.45337 207.07764

=====  
 \*\*\* End of Report \*\*\*

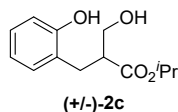

Data File C:\CHEM32\1\DATA\ZHOU-22\YZN021921.D  
 Sample Name: HW-12-43B

=====  
 Acq. Operator :  
 Acq. Instrument : Instrument 1 Location : -  
 Injection Date : 10/30/2022 9:58:49 PM  
 Acq. Method : C:\CHEM32\1\METHODS\DEF\_LC.M  
 Last changed : 10/30/2022 9:47:11 PM  
 (modified after loading)  
 Analysis Method : C:\CHEM32\1\METHODS\DEF\_LC.M  
 Last changed : 10/17/2023 10:20:10 PM  
 (modified after loading)  
 Sample Info : AS-H, Hexane/i-PrOH = 90/10, 0.8 mL/min, 30 oC, 230 nm

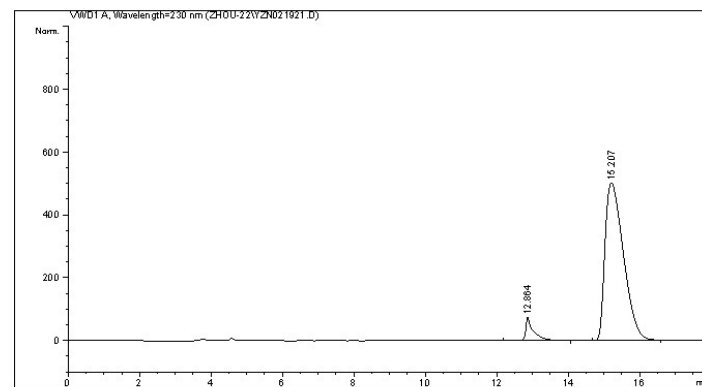

=====  
 Area Percent Report  
 =====

Sorted By : Signal  
 Multiplier: : 1.0000  
 Dilution: : 1.0000  
 Use Multiplier & Dilution Factor with ISTDs

Signal 1: VWD1 A, Wavelength=230 nm

| Peak # | RetTime [min] | Type | Width [min] | Area [mAU] | Height [mAU] | Area %  |
|--------|---------------|------|-------------|------------|--------------|---------|
| 1      | 12.864        | BB   | 0.1941      | 1091.21497 | 73.91610     | 5.7253  |
| 2      | 15.207        | BB   | 0.5657      | 1.79683e4  | 502.47910    | 94.2747 |

Totals : 1.90595e4 576.39520

=====  
 \*\*\* End of Report \*\*\*

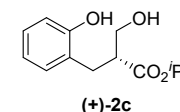

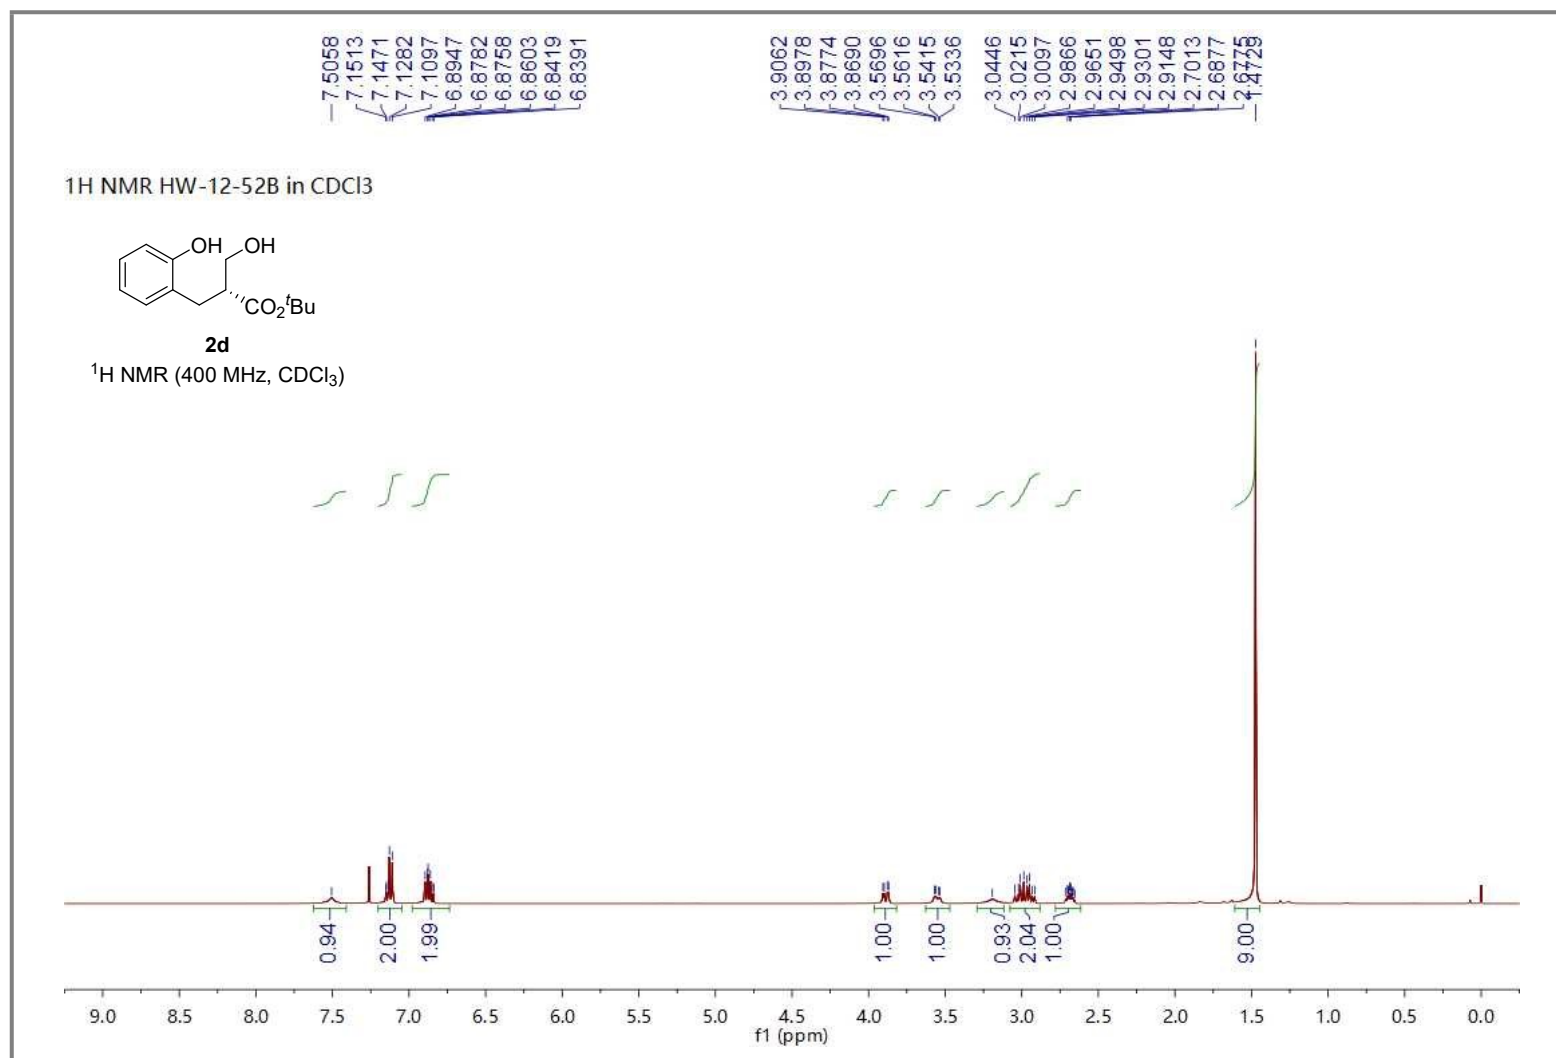



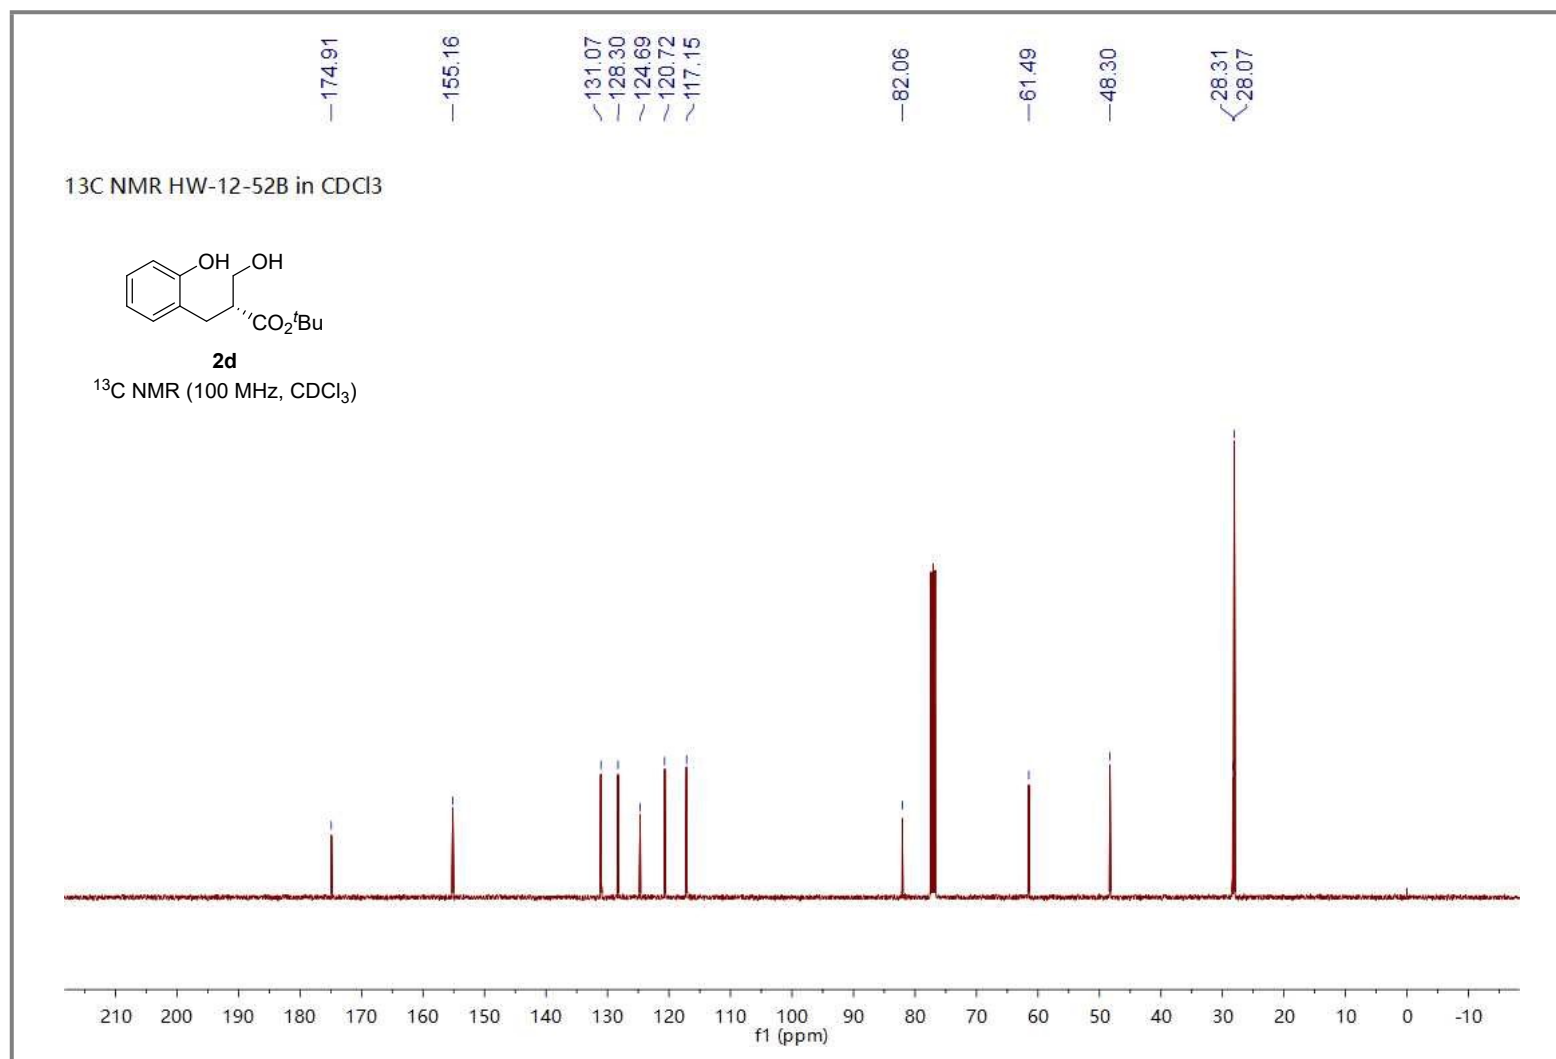

Data File D:\USERS\CHEMSTATION\1\DATA\ZHOU2022\YZ3005557 15-16-34.D  
 Sample Name: HW-12-52B+/-

```

=====
Acq. Operator   : SYSTEM
Sample Operator : SYSTEM
Acq. Instrument : 1260II                Location : -
Injection Date  : 11/3/2022 3:16:34 PM Inj       : 1
                                           Inj Volume: No inj
Acq. Method     : C:\USERS\PUBLIC\DOCUMENTS\CHEMSTATION\1\METHODS\lsm-1-58.M
Last changed    : 11/3/2022 3:15:39 PM by SYSTEM
                 (modified after loading)
Analysis Method : C:\Users\Public\Documents\ChemStation\1\Methods\def_LC.M
Last changed    : 10/17/2023 10:47:36 AM by SYSTEM
                 (modified after loading)
Sample Info     : AS-H, n-Hexane/1-PrOH = 95/5, 0.8 mL/min, 30 oC, 230 nm
  
```

Additional Info : Peak(s) manually integrated  
 VWD1 A, Wavelength=230 nm (G:\USERS\CHEMSTATION\1\DATA\ZHOU2022\YZ3005557 15-16-34.D)

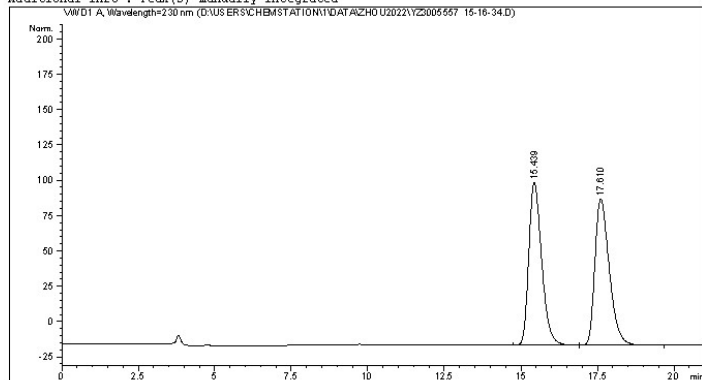

Area Percent Report

```

Sorted By      : Signal
Multiplier     : 1.0000
Dilution       : 1.0000
Do not use Multiplier & Dilution Factor with ISTDs
  
```

Signal 1: VWD1 A, Wavelength=230 nm

| Peak # | RetTime [min] | Type | Width [min] | Area [mAU*s] | Height [mAU] | Area %  |
|--------|---------------|------|-------------|--------------|--------------|---------|
| 1      | 15.439        | BB   | 0.4512      | 2422.44336   | 82.83044     | 49.9052 |
| 2      | 17.610        | BB   | 0.5026      | 2431.65088   | 74.54190     | 50.0948 |

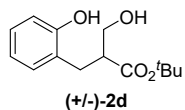

Data File D:\USERS\CHEMSTATION\1\DATA\ZHOU2022\YZ3005558 15-59-50.D  
 Sample Name: HW-12-52B

```

=====
Acq. Operator   : SYSTEM
Sample Operator : SYSTEM
Acq. Instrument : 1260II                Location : -
Injection Date  : 11/3/2022 3:59:50 PM Inj       : 1
                                           Inj Volume: No inj
Acq. Method     : C:\USERS\PUBLIC\DOCUMENTS\CHEMSTATION\1\METHODS\lsm-1-58.M
Last changed    : 11/3/2022 3:59:23 PM by SYSTEM
                 (modified after loading)
Analysis Method : C:\Users\Public\Documents\ChemStation\1\Methods\def_LC.M
Last changed    : 10/17/2023 10:48:28 AM by SYSTEM
                 (modified after loading)
Sample Info     : AS-H, n-Hexane/1-PrOH = 95/5, 0.8 mL/min, 30 oC, 230 nm
  
```

Additional Info : Peak(s) manually integrated  
 VWD1 A, Wavelength=230 nm (G:\USERS\CHEMSTATION\1\DATA\ZHOU2022\YZ3005558 15-59-50.D)

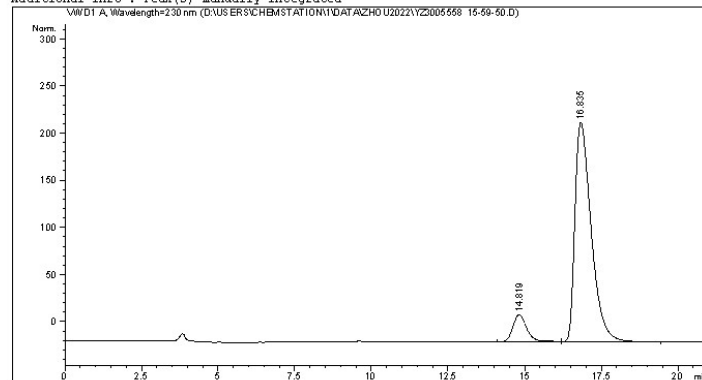

Area Percent Report

```

Sorted By      : Signal
Multiplier     : 1.0000
Dilution       : 1.0000
Do not use Multiplier & Dilution Factor with ISTDs
  
```

Signal 1: VWD1 A, Wavelength=230 nm

| Peak # | RetTime [min] | Type | Width [min] | Area [mAU*s] | Height [mAU] | Area %  |
|--------|---------------|------|-------------|--------------|--------------|---------|
| 1      | 14.819        | BB   | 0.4734      | 732.06317    | 23.63449     | 9.4616  |
| 2      | 16.835        | BB   | 0.5639      | 7005.12598   | 190.55113    | 90.5384 |

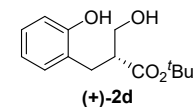

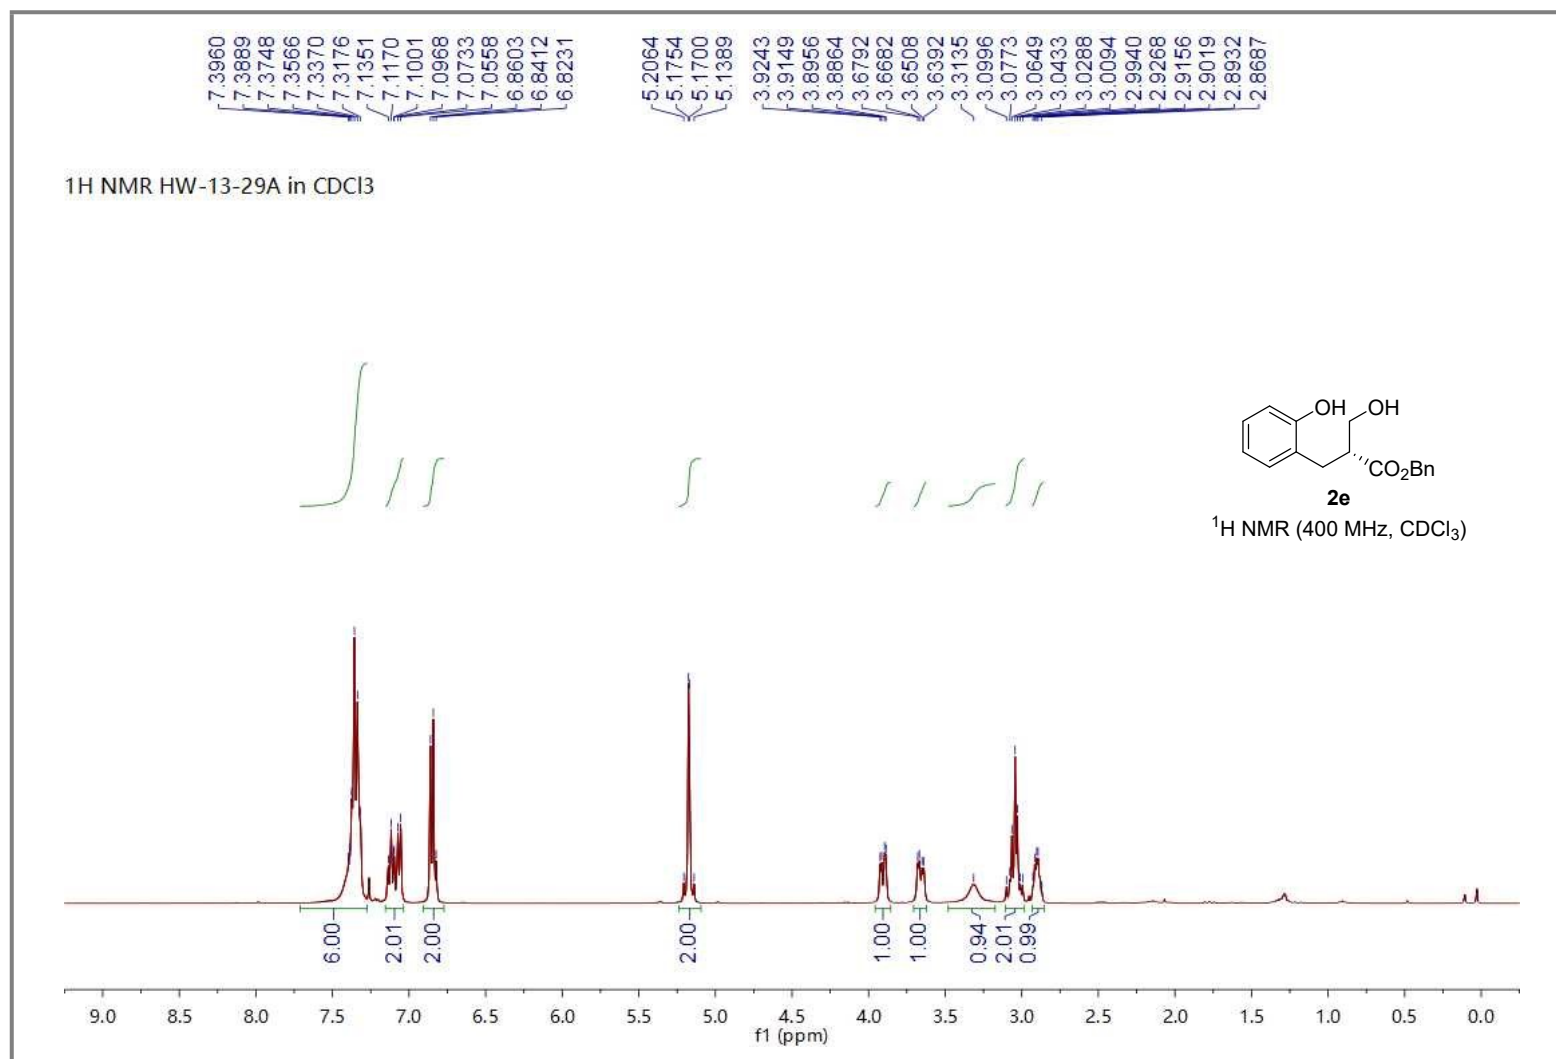

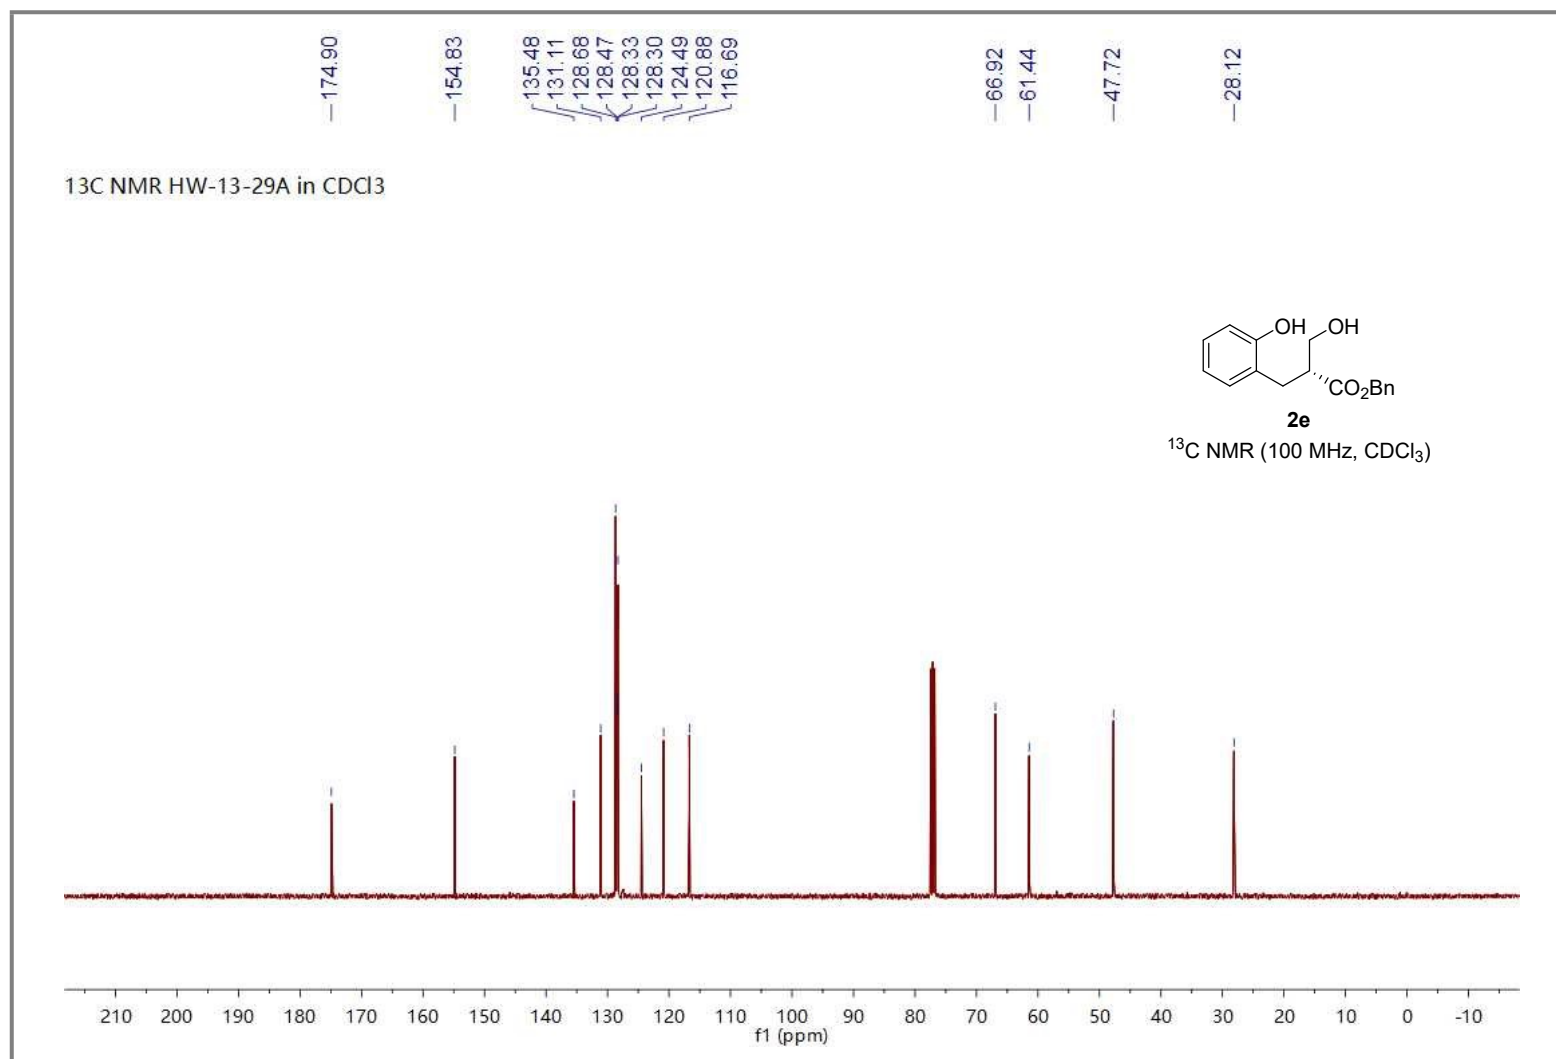

Data File C:\CHEM32\1\DATA\ZHOU-22\YZN022312.D  
Sample Name: HW-13-29A+/-

=====  
Acq. Operator :  
Acq. Instrument : Instrument 1 Location : -  
Injection Date : 1/4/2023 2:43:50 AM  
Acq. Method : C:\CHEM32\1\METHODS\DEF\_LC.M  
Last changed : 1/4/2023 2:41:14 AM  
(modified after loading)  
Analysis Method : C:\CHEM32\1\METHODS\DEF\_LC.M  
Last changed : 10/17/2023 10:22:19 PM  
Sample Info : AS-H, Hexane/i-PrOH = 90/10, 0.8 mL/min, 30 oC, 230 nm

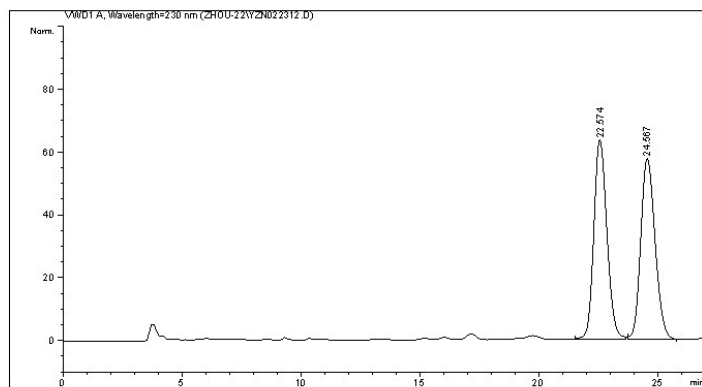

=====  
Area Percent Report  
=====

Sorted By : Signal  
Multiplier: : 1.0000  
Dilution: : 1.0000  
Use Multiplier & Dilution Factor with ISTDs

Signal 1: VWD1 A, Wavelength=230 nm

| Peak # | RetTime [min] | Type | Width [min] | Area [mAU] | Height [mAU] | Area %  |
|--------|---------------|------|-------------|------------|--------------|---------|
| 1      | 22.574        | BB   | 0.5937      | 2422.07251 | 63.27313     | 50.1355 |
| 2      | 24.567        | BB   | 0.6518      | 2408.98291 | 57.50860     | 49.8645 |

Totals : 4831.05542 120.78173

=====  
\*\*\* End of Report \*\*\*

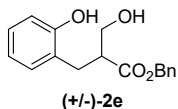

Data File C:\CHEM32\1\DATA\ZHOU-22\YZN022313.D  
Sample Name: HW-13-29A

=====  
Acq. Operator :  
Acq. Instrument : Instrument 1 Location : -  
Injection Date : 1/4/2023 3:12:47 AM  
Acq. Method : C:\CHEM32\1\METHODS\DEF\_LC.M  
Last changed : 1/4/2023 3:12:07 AM  
(modified after loading)  
Analysis Method : C:\CHEM32\1\METHODS\DEF\_LC.M  
Last changed : 10/17/2023 10:23:20 PM  
Sample Info : AS-H, Hexane/i-PrOH = 90/10, 0.8 mL/min, 30 oC, 230 nm

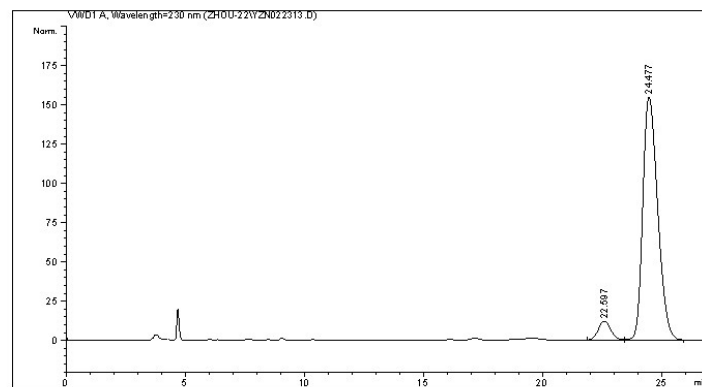

=====  
Area Percent Report  
=====

Sorted By : Signal  
Multiplier: : 1.0000  
Dilution: : 1.0000  
Use Multiplier & Dilution Factor with ISTDs

Signal 1: VWD1 A, Wavelength=230 nm

| Peak # | RetTime [min] | Type | Width [min] | Area [mAU] | Height [mAU] | Area %  |
|--------|---------------|------|-------------|------------|--------------|---------|
| 1      | 22.597        | BV   | 0.5685      | 436.08621  | 11.94907     | 6.1070  |
| 2      | 24.477        | VB   | 0.6742      | 6704.71338 | 154.81198    | 93.8930 |

Totals : 7140.79959 166.76106

=====  
\*\*\* End of Report \*\*\*

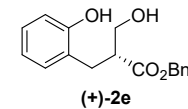

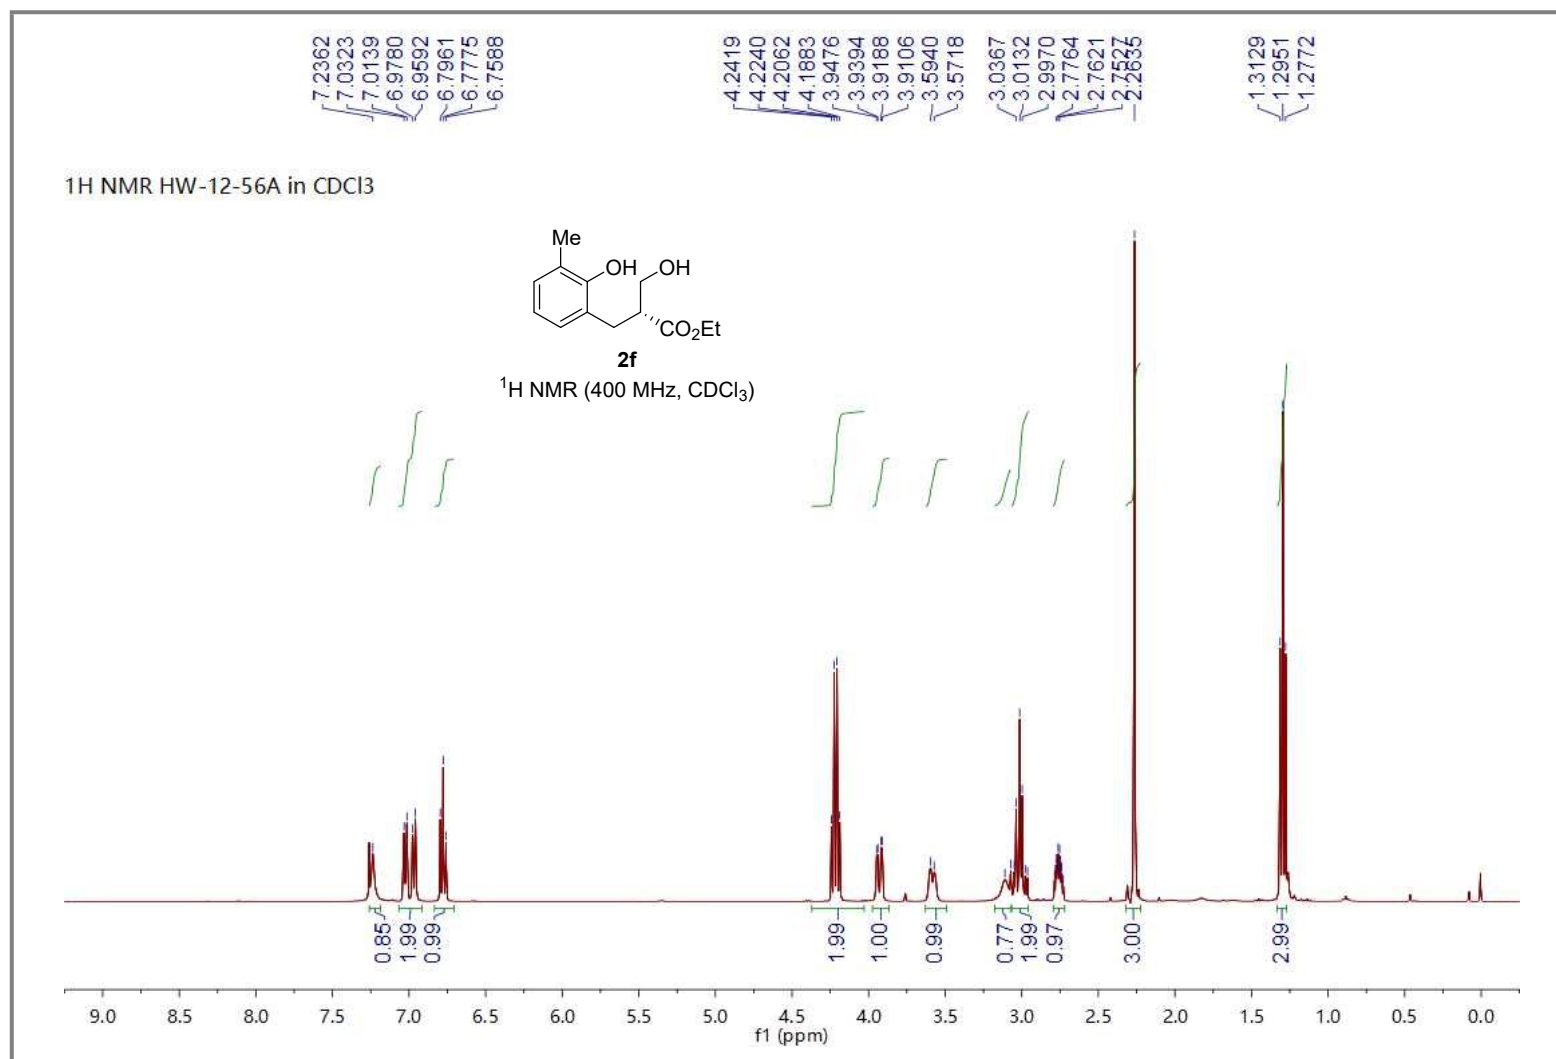

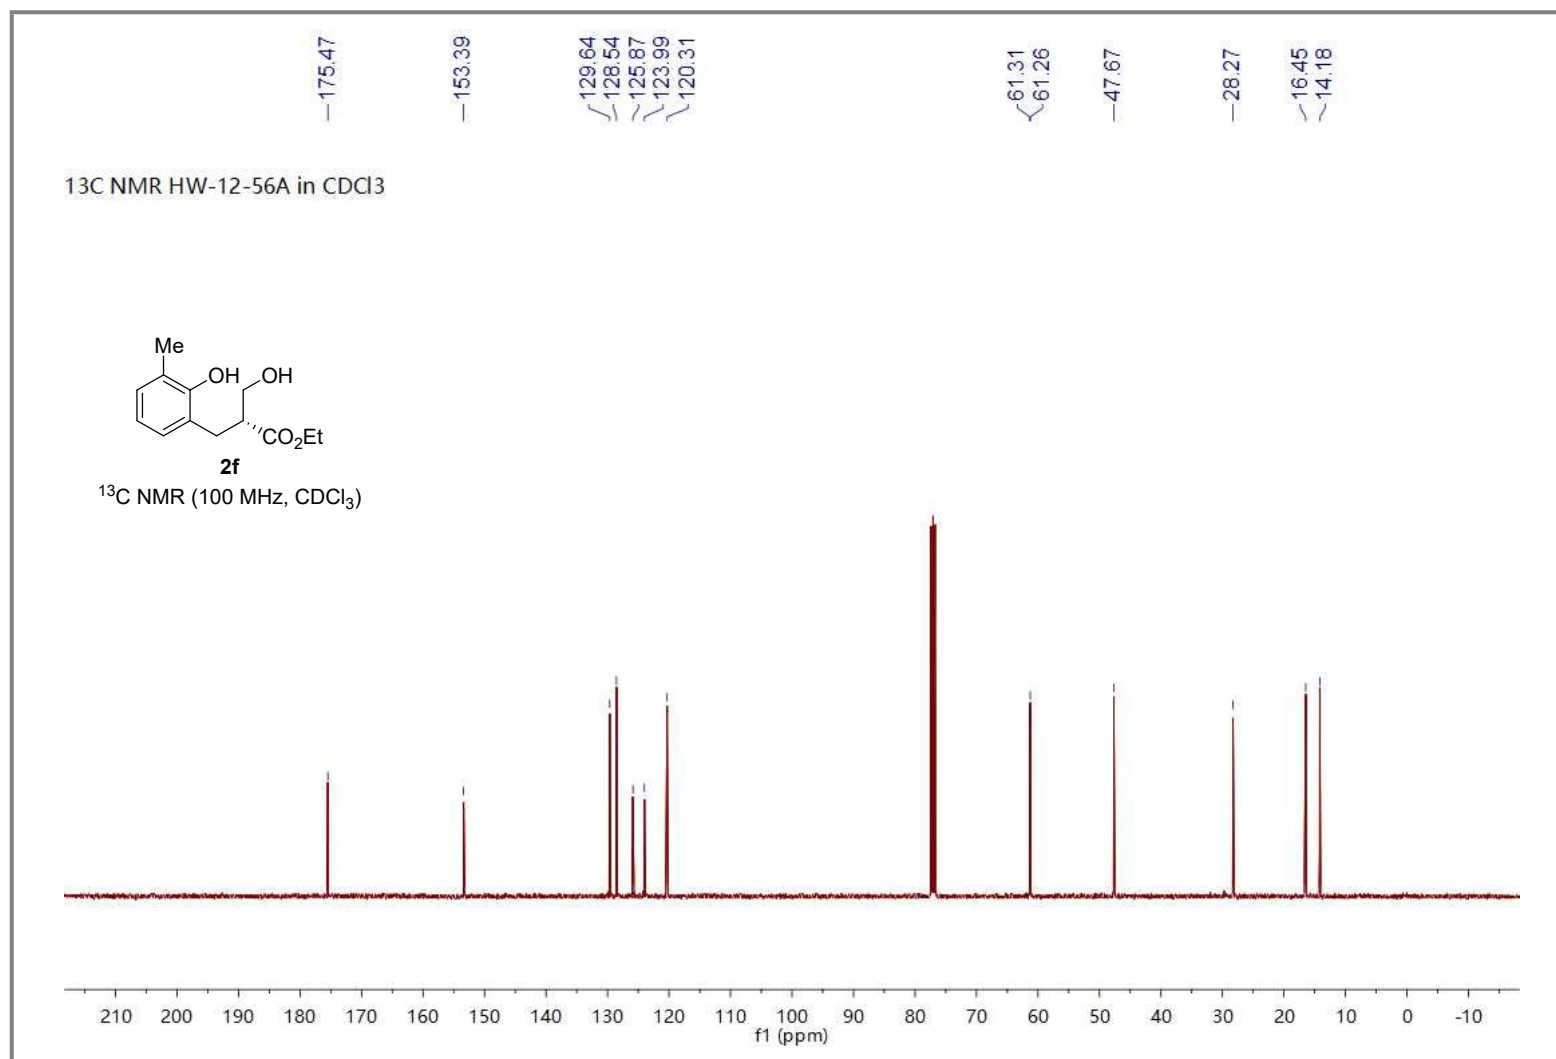

Data File C:\USERS\PUBLIC\DOCUMENTS\CHEMSTATION\1\DATA\2022\YZH002733 09-05-03.D  
 Sample Name: HW-12-56A+/-

=====  
 Acq. Operator : SYSTEM  
 Sample Operator : SYSTEM  
 Acq. Instrument : HPLC1260 II Location : 1  
 Injection Date : 11/7/2022 9:05:03 AM Inj : 1  
 Inj Volume : No inj  
 Acq. Method : C:\USERS\PUBLIC\DOCUMENTS\CHEMSTATION\1\METHODS\def\_LC1.M  
 Last changed : 11/7/2022 8:39:09 AM by SYSTEM  
 (modified after loading)  
 Analysis Method : C:\USERS\PUBLIC\DOCUMENTS\CHEMSTATION\1\METHODS\def\_LC1.M  
 Last changed : 10/17/2023 10:39:05 AM by SYSTEM  
 (modified after loading)  
 Sample Info : AS-H, Hexane/1-PrOH = 90/10, 0.8 mL/min, 30 oC, 230 nm

Additional Info : Peak(s) manually integrated

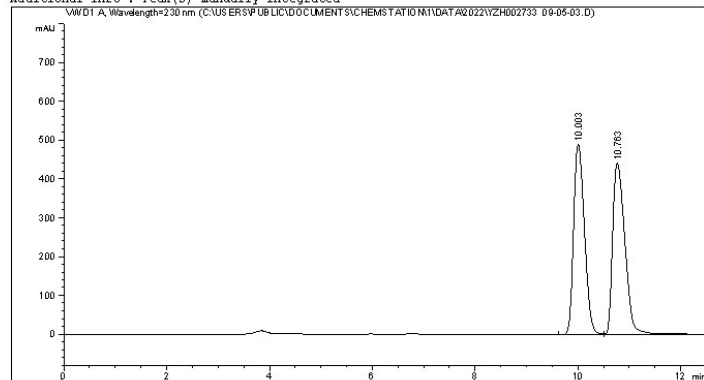

=====  
 Area Percent Report  
 =====

Sorted By : Signal  
 Multiplier : 1.0000  
 Dilution : 1.0000  
 Do not use Multiplier & Dilution Factor with ISTDs

Signal 1: VWD1 A, Wavelength=230 nm

| Peak # | RetTime [min] | Type | Width [min] | Area [mAU*s] | Height [mAU] | Area %  |
|--------|---------------|------|-------------|--------------|--------------|---------|
| 1      | 10.003        | BV   | 0.2300      | 7136.70947   | 489.74524    | 49.3328 |
| 2      | 10.763        | VB   | 0.2606      | 7329.75830   | 441.75406    | 50.6672 |

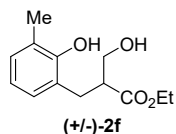

Data File C:\USERS\PUBLIC\DOCUMENTS\CHEMSTATION\1\DATA\2022\YZH002734 09-27-08.D  
 Sample Name: HW-12-56A

=====  
 Acq. Operator : SYSTEM  
 Sample Operator : SYSTEM  
 Acq. Instrument : HPLC1260 II Location : 1  
 Injection Date : 11/7/2022 9:27:09 AM Inj : 1  
 Inj Volume : No inj  
 Acq. Method : C:\USERS\PUBLIC\DOCUMENTS\CHEMSTATION\1\METHODS\def\_LC1.M  
 Last changed : 11/7/2022 8:39:09 AM by SYSTEM  
 (modified after loading)  
 Analysis Method : C:\USERS\PUBLIC\DOCUMENTS\CHEMSTATION\1\METHODS\def\_LC1.M  
 Last changed : 10/17/2023 10:39:05 AM by SYSTEM  
 (modified after loading)  
 Sample Info : AS-H, Hexane/1-PrOH = 90/10, 0.8 mL/min, 30 oC, 230 nm

Additional Info : Peak(s) manually integrated

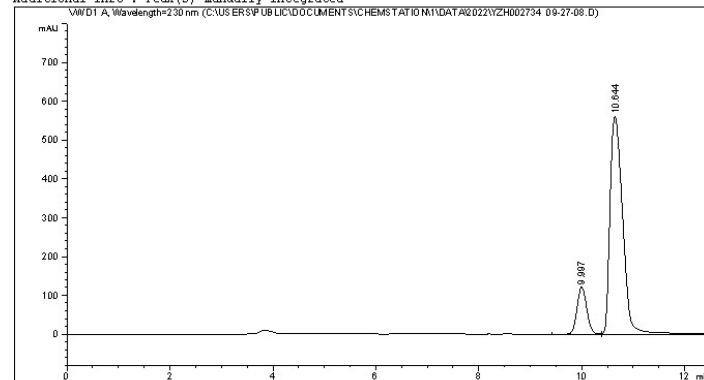

=====  
 Area Percent Report  
 =====

Sorted By : Signal  
 Multiplier : 1.0000  
 Dilution : 1.0000  
 Do not use Multiplier & Dilution Factor with ISTDs

Signal 1: VWD1 A, Wavelength=230 nm

| Peak # | RetTime [min] | Type | Width [min] | Area [mAU*s] | Height [mAU] | Area %  |
|--------|---------------|------|-------------|--------------|--------------|---------|
| 1      | 9.997         | BV   | 0.2035      | 1571.79883   | 121.00585    | 14.2329 |
| 2      | 10.644        | VB   | 0.2770      | 9471.63477   | 560.87994    | 85.7671 |

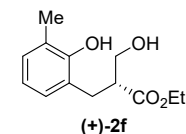



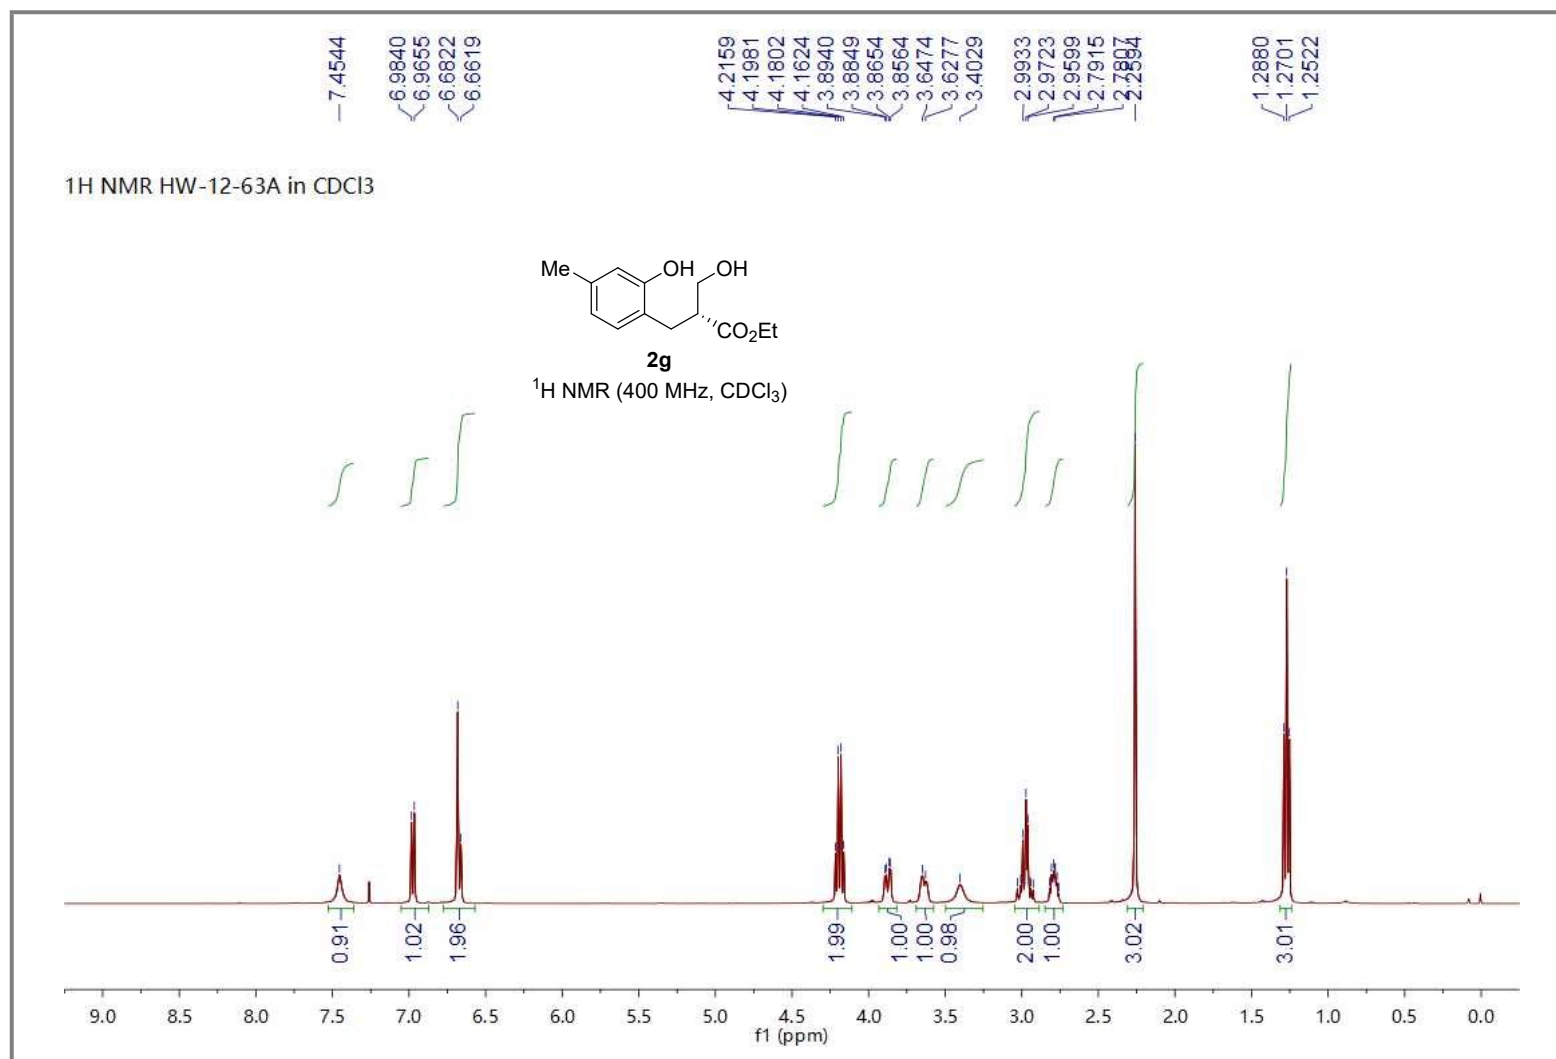

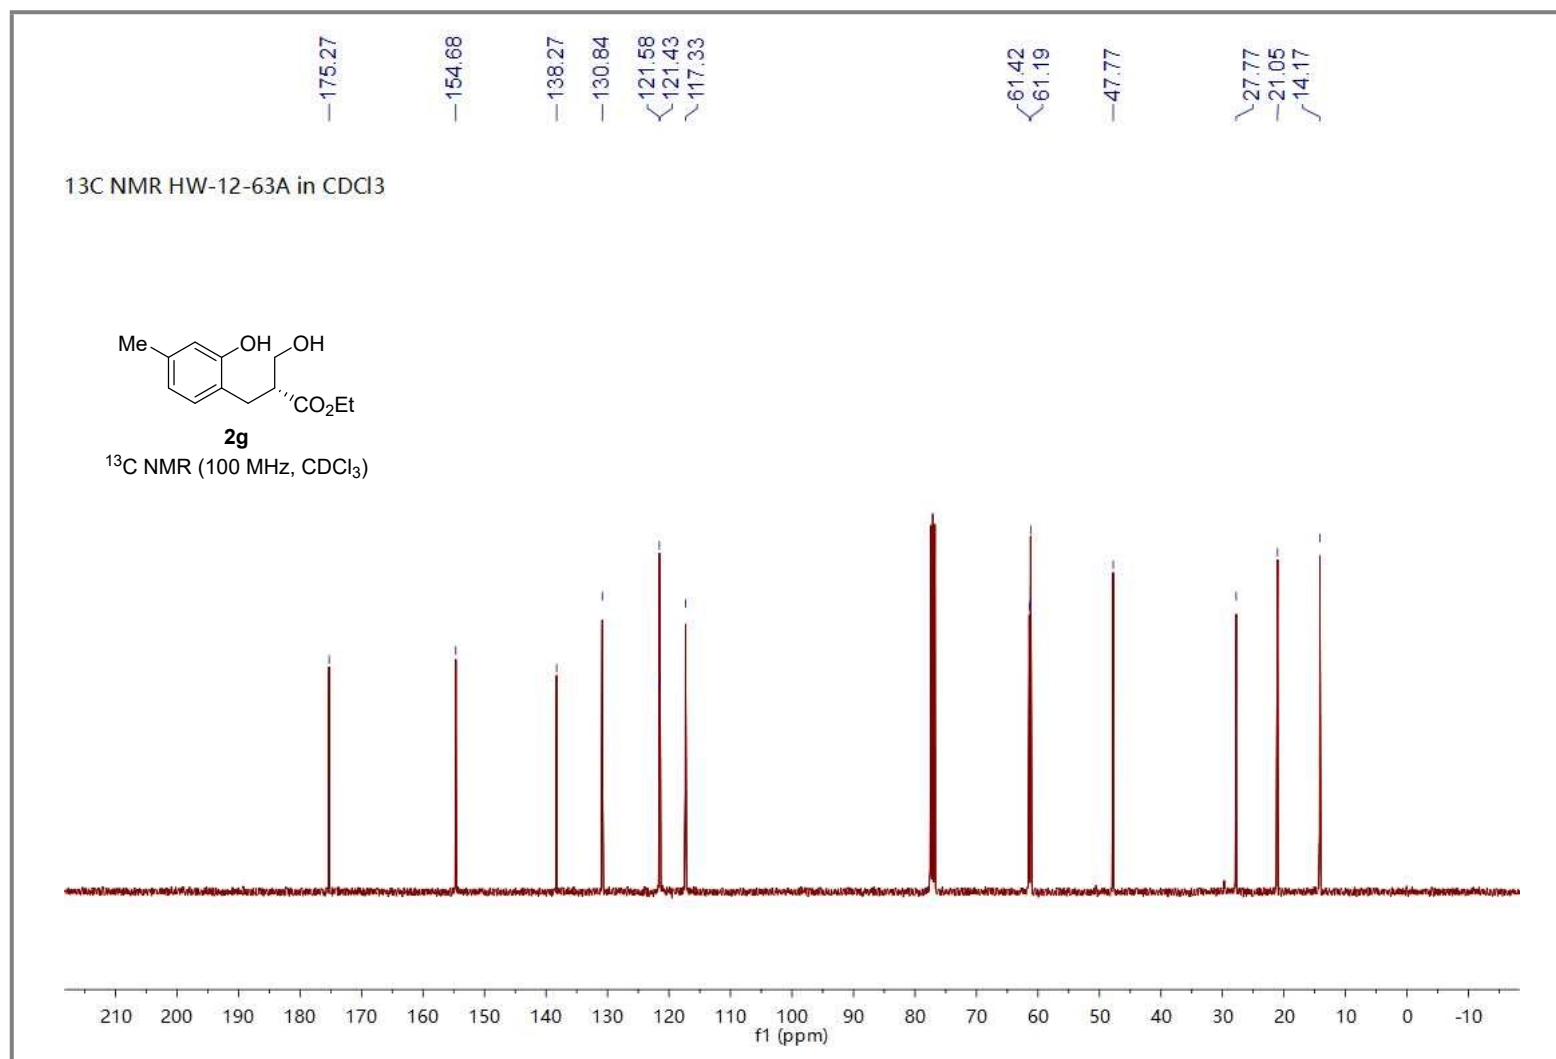

Data File C:\CHEM32\1\DATA\ZHOU-22\YZN022050.D  
Sample Name: HW-12-63A+/-

=====  
Acq. Operator :  
Acq. Instrument : Instrument 1 Location : -  
Injection Date : 11/15/2022 10:36:57 PM  
Acq. Method : C:\CHEM32\1\METHODS\DEF\_LC.M  
Last changed : 11/15/2022 10:36:31 PM  
(modified after loading)  
Analysis Method : C:\CHEM32\1\METHODS\DEF\_LC.M  
Last changed : 10/17/2023 10:32:22 PM  
(modified after loading)  
Sample Info : IB, Hexane/i-PrOH = 95/5, 0.8 mL/min, 30 oC, 230 nm

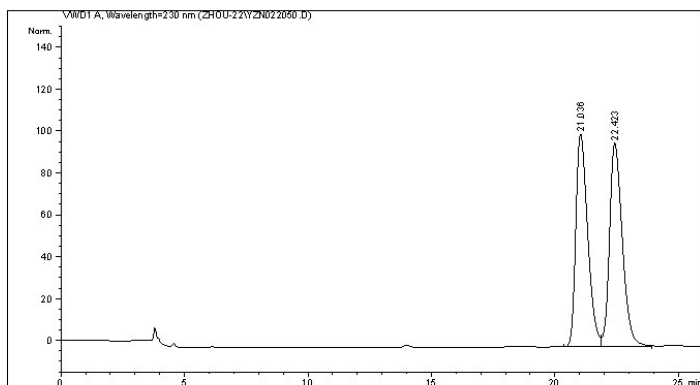

=====  
Area Percent Report  
=====

Sorted By : Signal  
Multiplier: : 1.0000  
Dilution: : 1.0000  
Use Multiplier & Dilution Factor with ISTDs

Signal 1: VWD1 A, Wavelength=230 nm

| Peak # | RetTime [min] | Type | Width [min] | Area mAU   | Height %s | Area [mAU] | Area % |
|--------|---------------|------|-------------|------------|-----------|------------|--------|
| 1      | 21.036        | BV   | 0.5132      | 3400.93555 | 101.50028 | 49.4587    |        |
| 2      | 22.423        | VB   | 0.5518      | 3475.38354 | 97.02937  | 50.5413    |        |

Totals : 6876.31909 198.52966

=====  
\*\*\* End of Report \*\*\*

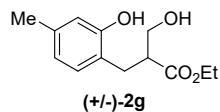

Data File C:\CHEM32\1\DATA\ZHOU-22\YZN022052.D  
Sample Name: HW-12-63A

=====  
Acq. Operator :  
Acq. Instrument : Instrument 1 Location : -  
Injection Date : 11/15/2022 11:36:05 PM  
Acq. Method : C:\CHEM32\1\METHODS\DEF\_LC.M  
Last changed : 11/15/2022 11:34:22 PM  
(modified after loading)  
Analysis Method : C:\CHEM32\1\METHODS\DEF\_LC.M  
Last changed : 10/17/2023 10:33:11 PM  
(modified after loading)  
Sample Info : IB, Hexane/i-PrOH = 95/5, 0.8 mL/min, 30 oC, 230 nm

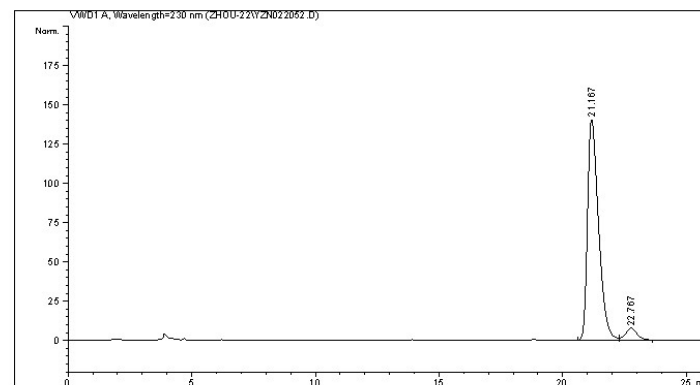

=====  
Area Percent Report  
=====

Sorted By : Signal  
Multiplier: : 1.0000  
Dilution: : 1.0000  
Use Multiplier & Dilution Factor with ISTDs

Signal 1: VWD1 A, Wavelength=230 nm

| Peak # | RetTime [min] | Type | Width [min] | Area mAU   | Height %s | Area [mAU] | Area % |
|--------|---------------|------|-------------|------------|-----------|------------|--------|
| 1      | 21.167        | BV   | 0.4709      | 4340.50195 | 140.55257 | 94.6579    |        |
| 2      | 22.767        | VB   | 0.4975      | 244.96194  | 7.55889   | 5.3421     |        |

Totals : 4585.46390 148.11145

=====  
\*\*\* End of Report \*\*\*

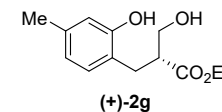

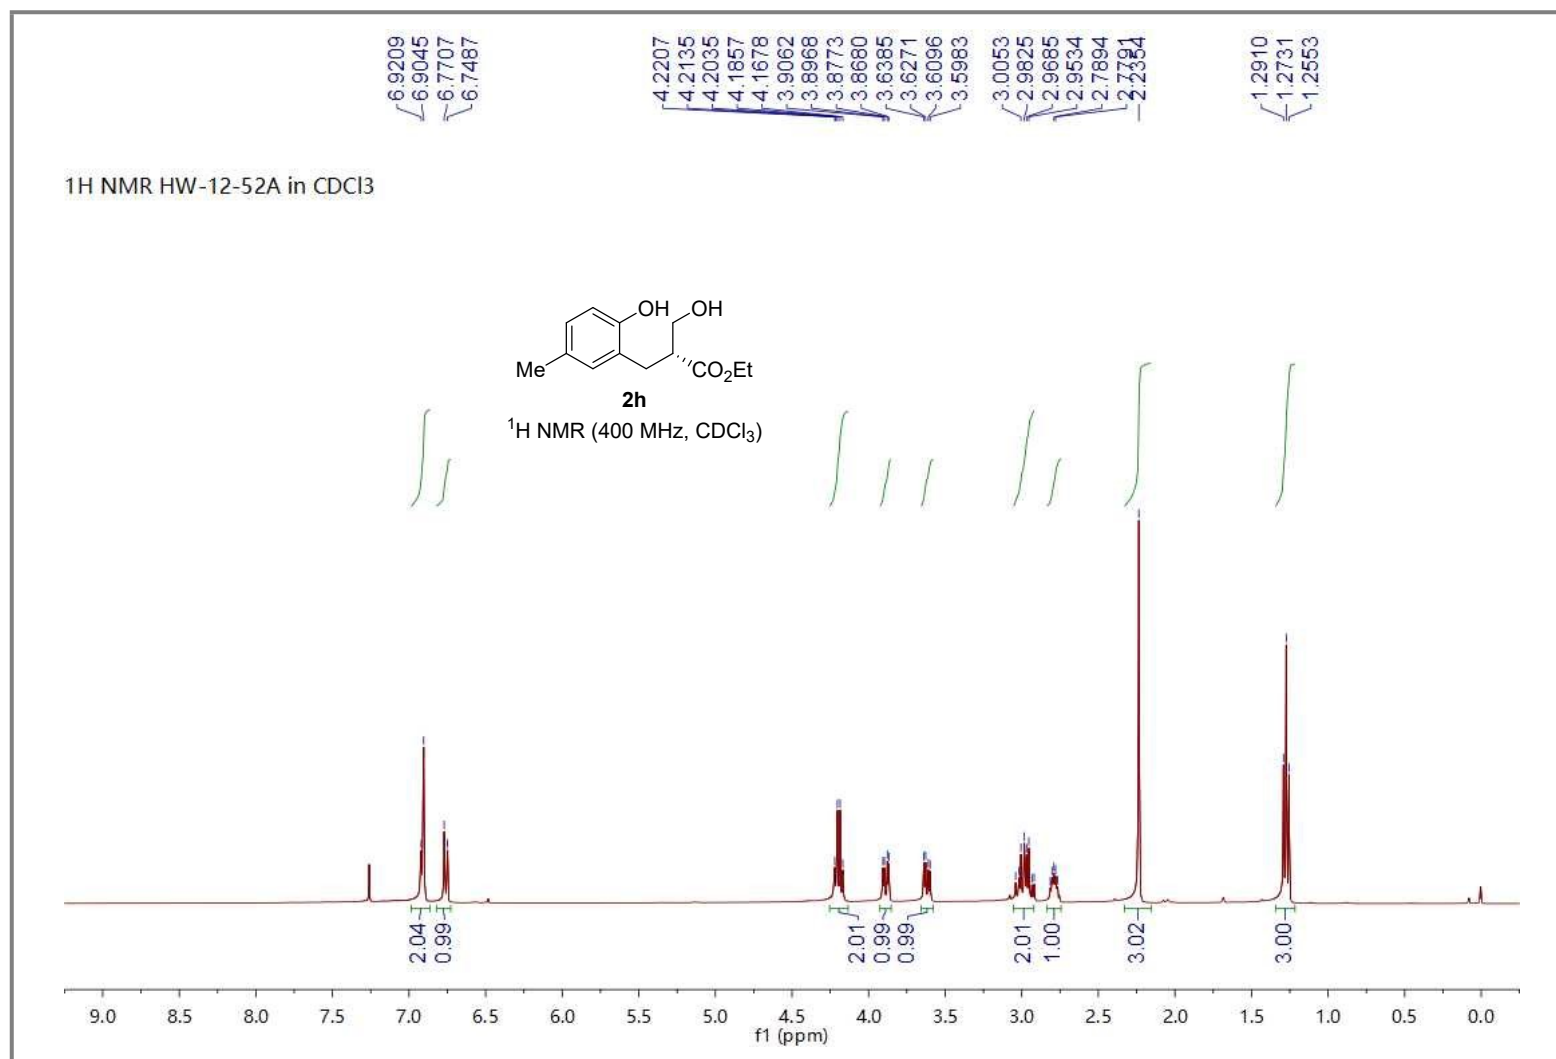

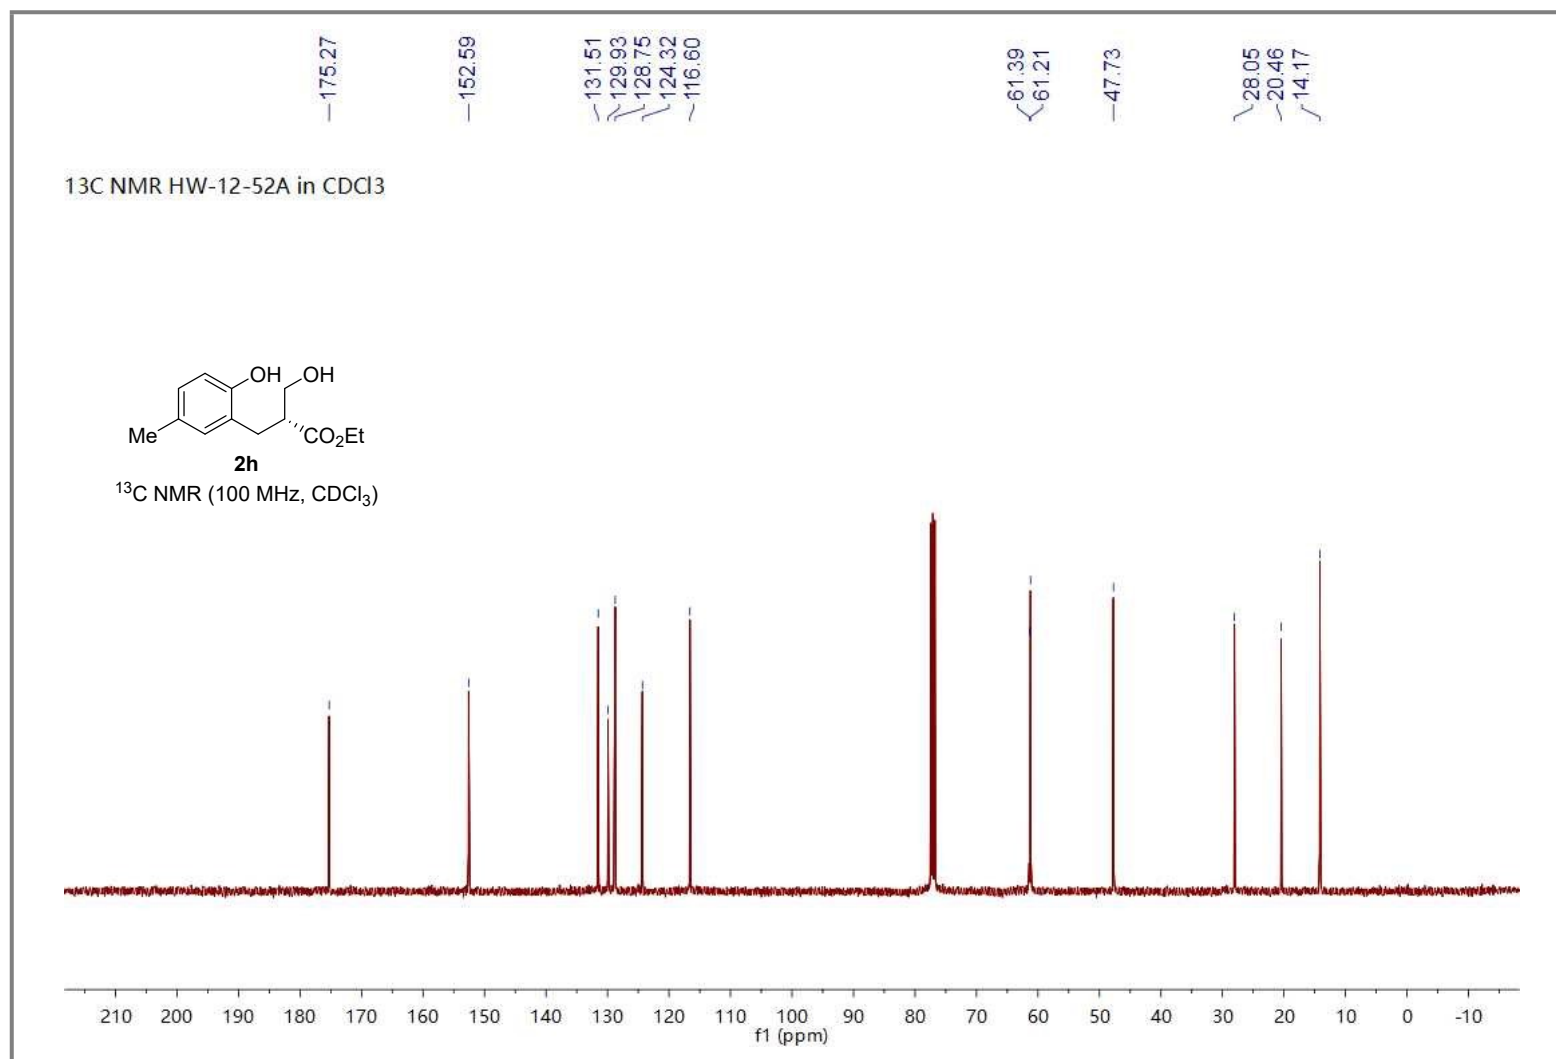

Data File C:\USERS\PUBLIC\DOCUMENTS\CHEMSTATION\1\DATA\2023\YZH005564 18-51-45.D  
 Sample Name: HW-12-52A+/-

=====

Acq. Operator : SYSTEM  
 Sample Operator : SYSTEM  
 Acq. Instrument : HPLC1260 II Location : 1  
 Injection Date : 11/28/2023 6:51:45 PM Inj : 1  
 Inj Volume : No inj

Acq. Method : C:\USERS\PUBLIC\DOCUMENTS\CHEMSTATION\1\METHODS\def\_LC1.M  
 Last changed : 11/28/2023 6:48:19 PM by SYSTEM  
 (modified after loading)

Analysis Method : C:\USERS\PUBLIC\DOCUMENTS\CHEMSTATION\1\METHODS\def\_LC1.M  
 Last changed : 11/29/2023 11:05:26 AM by SYSTEM  
 (modified after loading)

Sample Info : AS-H, Hexane/1-PrOH = 95/5, 0.8 mL/min, 30 oC, 230 nm

Additional Info : Peak(s) manually integrated  
 VWD1 A, Wavelength=230 nm (C:\USERS\PUBLIC\DOCUMENTS\CHEMSTATION\1\DATA\2023\YZH005564 18-51-45.D)

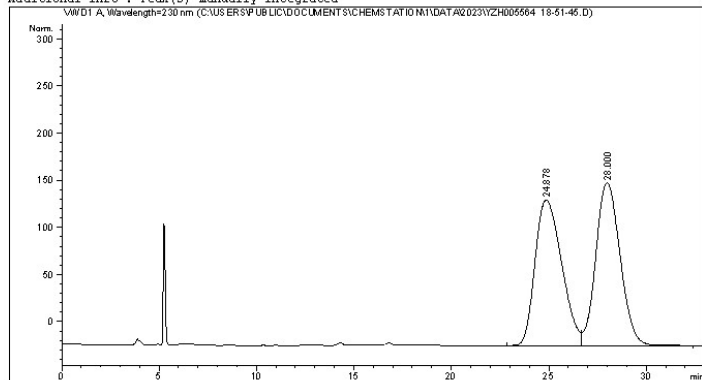

Area Percent Report

Sorted By : Signal  
 Multiplier : 1.0000  
 Dilution : 1.0000  
 Sample Amount : 1.00000 [ng/ul] (not used in calc.)  
 Do not use Multiplier & Dilution Factor with ISTDs

Signal 1: VWD1 A, Wavelength=230 nm

| Peak # | RetTime [min] | Type | Width [min] | Area [mAU*s] | Height [mAU] | Area %  |
|--------|---------------|------|-------------|--------------|--------------|---------|
| 1      | 24.878        | BV   | 1.4839      | 1.05224e4    | 111.00722    | 49.4465 |
| 2      | 28.000        | VB   | 1.3391      | 1.07580e4    | 123.88742    | 50.5535 |

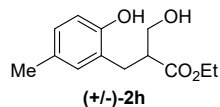

Data File C:\USERS\PUBLIC\DOCUMENTS\CHEMSTATION\1\DATA\2023\YZH005565 19-26-57.D  
 Sample Name: HW-12-52A

=====

Acq. Operator : SYSTEM  
 Sample Operator : SYSTEM  
 Acq. Instrument : HPLC1260 II Location : 1  
 Injection Date : 11/28/2023 7:26:57 PM Inj : 1  
 Inj Volume : No inj

Acq. Method : C:\USERS\PUBLIC\DOCUMENTS\CHEMSTATION\1\METHODS\def\_LC1.M  
 Last changed : 11/28/2023 6:48:19 PM by SYSTEM  
 (modified after loading)

Analysis Method : C:\USERS\PUBLIC\DOCUMENTS\CHEMSTATION\1\METHODS\def\_LC1.M  
 Last changed : 11/29/2023 11:06:40 AM by SYSTEM  
 (modified after loading)

Sample Info : AS-H, Hexane/1-PrOH = 95/5, 0.8 mL/min, 30 oC, 230 nm

Additional Info : Peak(s) manually integrated  
 VWD1 A, Wavelength=230 nm (C:\USERS\PUBLIC\DOCUMENTS\CHEMSTATION\1\DATA\2023\YZH005565 19-26-57.D)

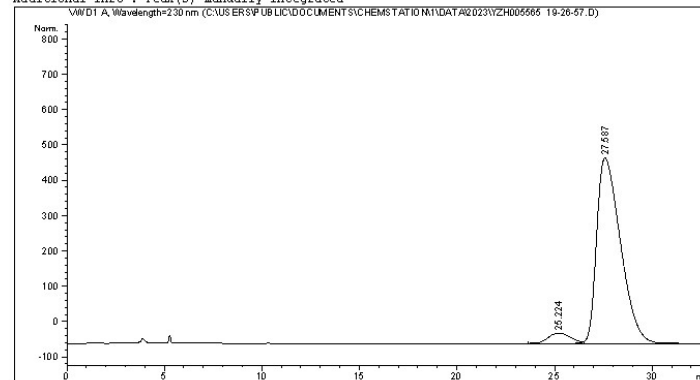

Area Percent Report

Sorted By : Signal  
 Multiplier : 1.0000  
 Dilution : 1.0000  
 Sample Amount : 1.00000 [ng/ul] (not used in calc.)  
 Do not use Multiplier & Dilution Factor with ISTDs

Signal 1: VWD1 A, Wavelength=230 nm

| Peak # | RetTime [min] | Type | Width [min] | Area [mAU*s] | Height [mAU] | Area %  |
|--------|---------------|------|-------------|--------------|--------------|---------|
| 1      | 25.224        | BV E | 1.2266      | 1771.88013   | 22.62739     | 4.9326  |
| 2      | 27.587        | VB R | 1.3056      | 3.41502e4    | 402.61203    | 95.0674 |

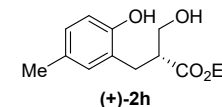

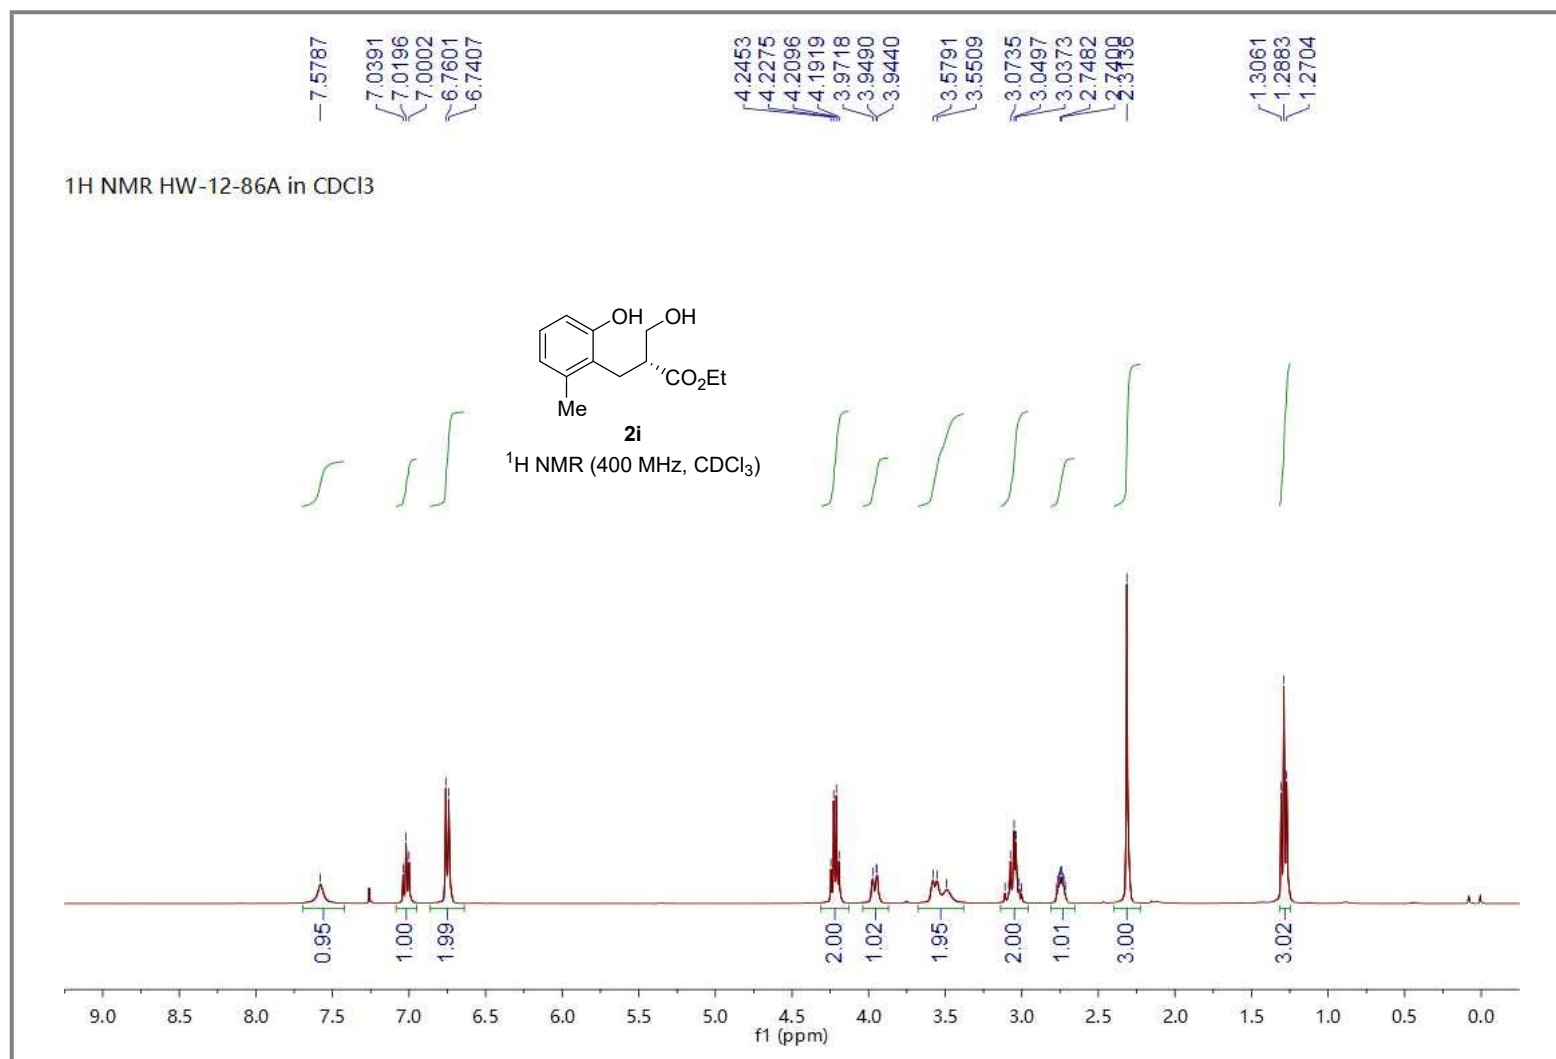

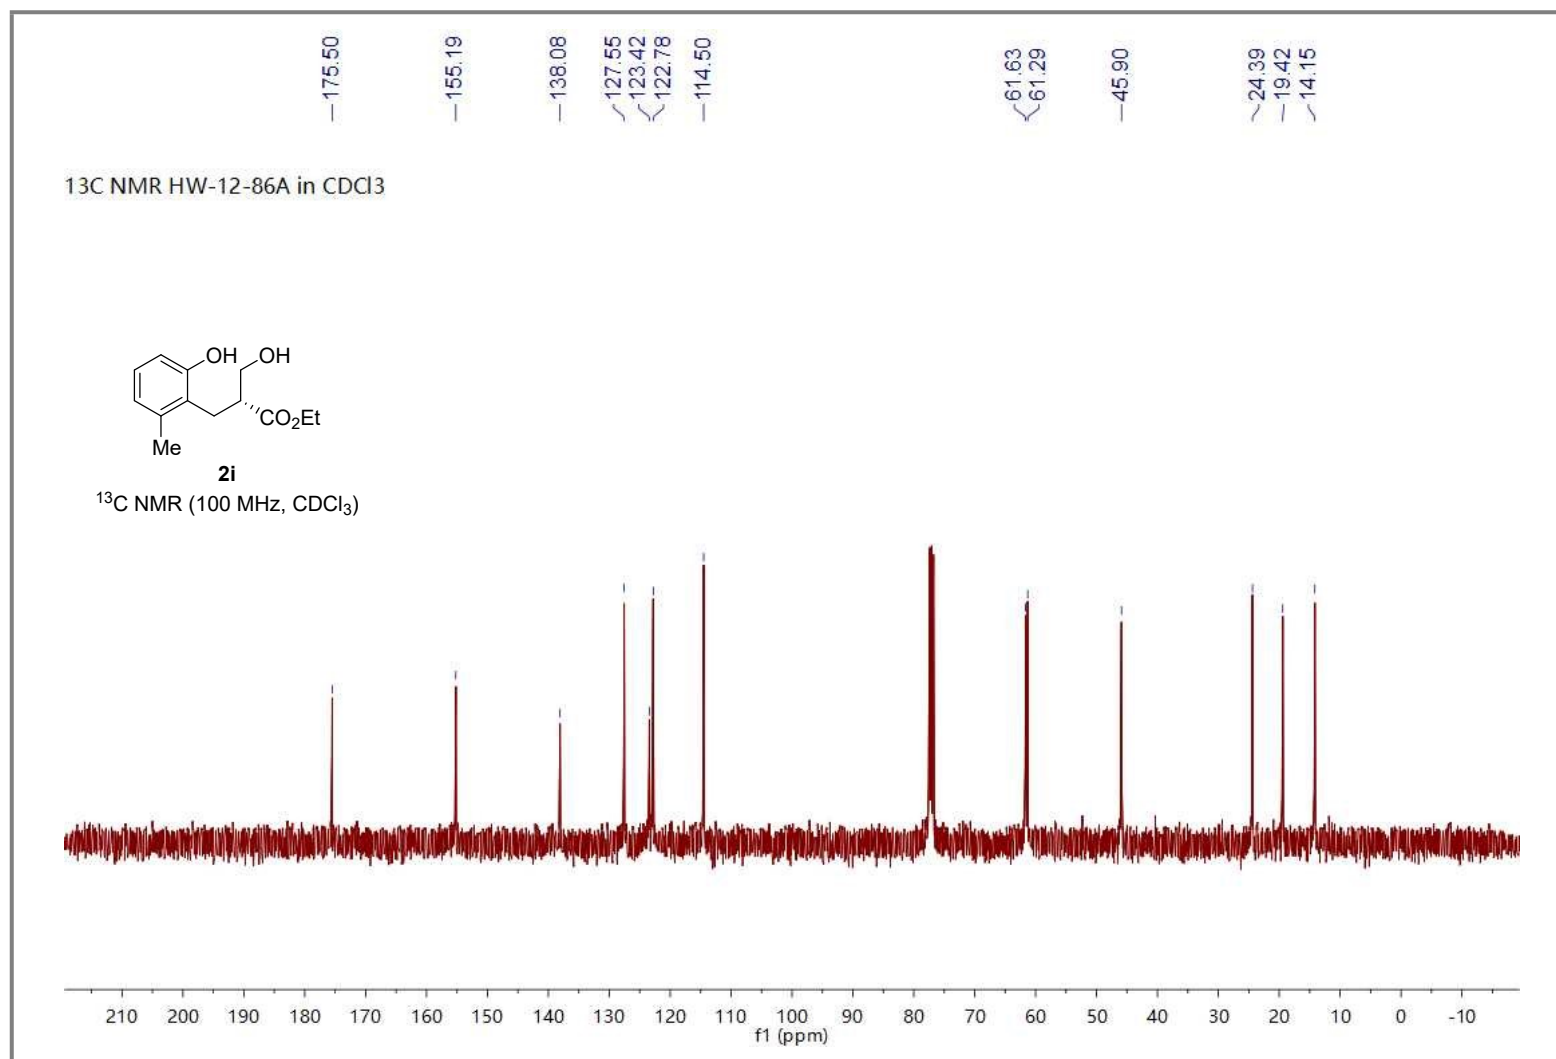



Data File D:\USERS\CHEMSTATION\1\DATA\ZHOU2022\YZ3005839 20-17-56.D  
Sample Name: HW-12-86A+/-

=====  
Acq. Operator : SYSTEM  
Sample Operator : SYSTEM  
Acq. Instrument : 1260II Location : -  
Injection Date : 12/6/2022 8:17:56 PM Inj : 1  
Inj Volume : No inj  
Acq. Method : C:\USERS\PUBLIC\DOCUMENTS\CHEMSTATION\1\METHODS\lsm-1-58.M  
Last changed : 12/6/2022 8:16:54 PM by SYSTEM  
(modified after loading)  
Analysis Method : C:\Users\Public\Documents\ChemStation\1\Methods\def\_LC.M  
Last changed : 10/17/2023 10:49:33 AM by SYSTEM  
(modified after loading)  
Sample Info : AS-H, n-Hexane/1-PrOH = 90/10, 0.8 mL/min, 30 oC, 230 nm

Additional Info : Peak(s) manually integrated

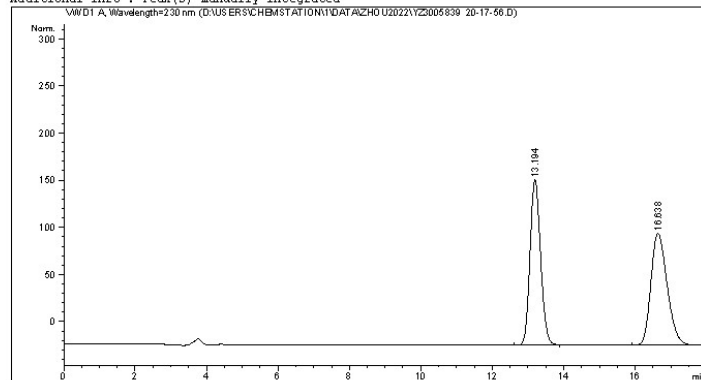

=====  
Area Percent Report  
=====

Sorted By : Signal  
Multiplier : 1.0000  
Dilution : 1.0000  
Do not use Multiplier & Dilution Factor with ISTDs

Signal 1: VWD1 A, Wavelength=230 nm

| Peak # | RetTime [min] | Type | Width [min] | Area [mAU*s] | Height [mAU] | Area %  |
|--------|---------------|------|-------------|--------------|--------------|---------|
| 1      | 13.194        | BB   | 0.3200      | 2606.14819   | 127.19192    | 48.9720 |
| 2      | 16.638        | BB   | 0.4914      | 2715.56299   | 85.98973     | 51.0280 |

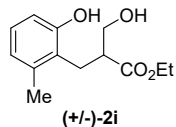

Data File D:\USERS\CHEMSTATION\1\DATA\ZHOU2022\YZ3005840 20-38-28.D  
Sample Name: HW-12-86A

=====  
Acq. Operator : SYSTEM  
Sample Operator : SYSTEM  
Acq. Instrument : 1260II Location : -  
Injection Date : 12/6/2022 8:38:28 PM Inj : 1  
Inj Volume : No inj  
Acq. Method : C:\USERS\PUBLIC\DOCUMENTS\CHEMSTATION\1\METHODS\lsm-1-58.M  
Last changed : 12/6/2022 8:16:54 PM by SYSTEM  
(modified after loading)  
Analysis Method : C:\Users\Public\Documents\ChemStation\1\Methods\def\_LC.M  
Last changed : 10/17/2023 10:50:22 AM by SYSTEM  
(modified after loading)  
Sample Info : AS-H, n-Hexane/1-PrOH = 90/10, 0.8 mL/min, 30 oC, 230 nm

Additional Info : Peak(s) manually integrated

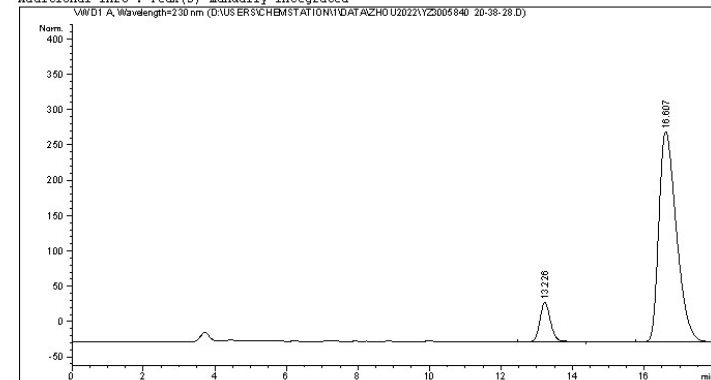

=====  
Area Percent Report  
=====

Sorted By : Signal  
Multiplier : 1.0000  
Dilution : 1.0000  
Do not use Multiplier & Dilution Factor with ISTDs

Signal 1: VWD1 A, Wavelength=230 nm

| Peak # | RetTime [min] | Type | Width [min] | Area [mAU*s] | Height [mAU] | Area %  |
|--------|---------------|------|-------------|--------------|--------------|---------|
| 1      | 13.226        | BB   | 0.3164      | 922.83313    | 44.96306     | 10.1848 |
| 2      | 16.607        | BB   | 0.5258      | 8138.02637   | 239.87434    | 89.8152 |

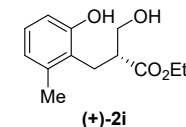

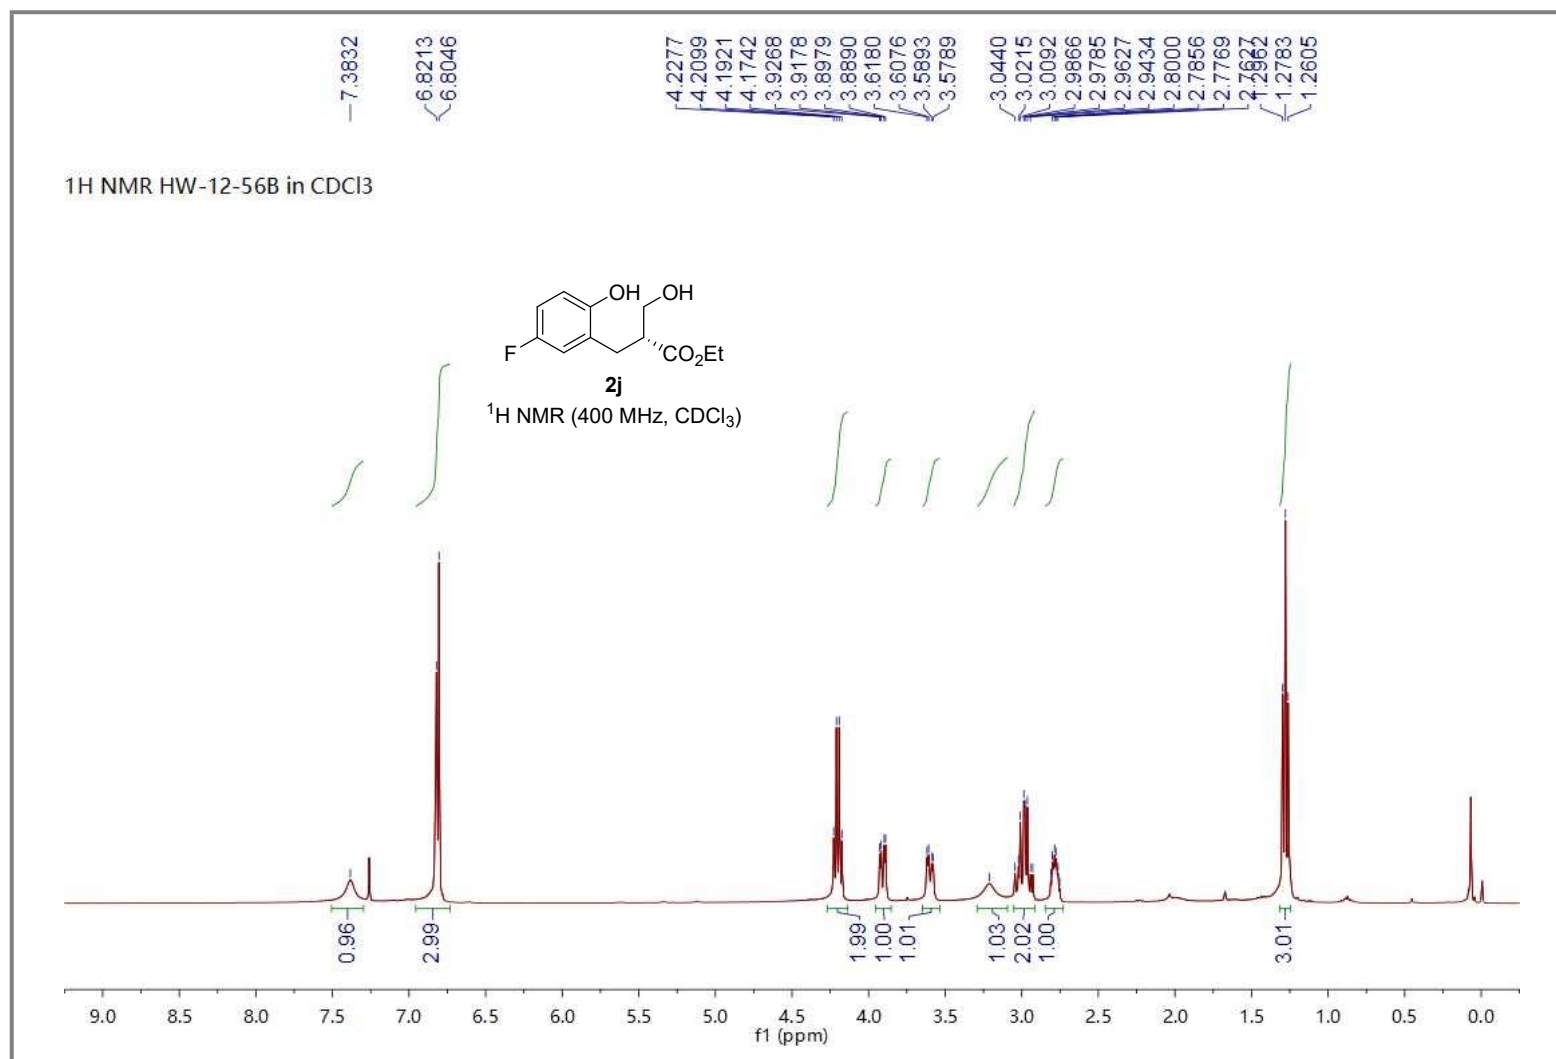

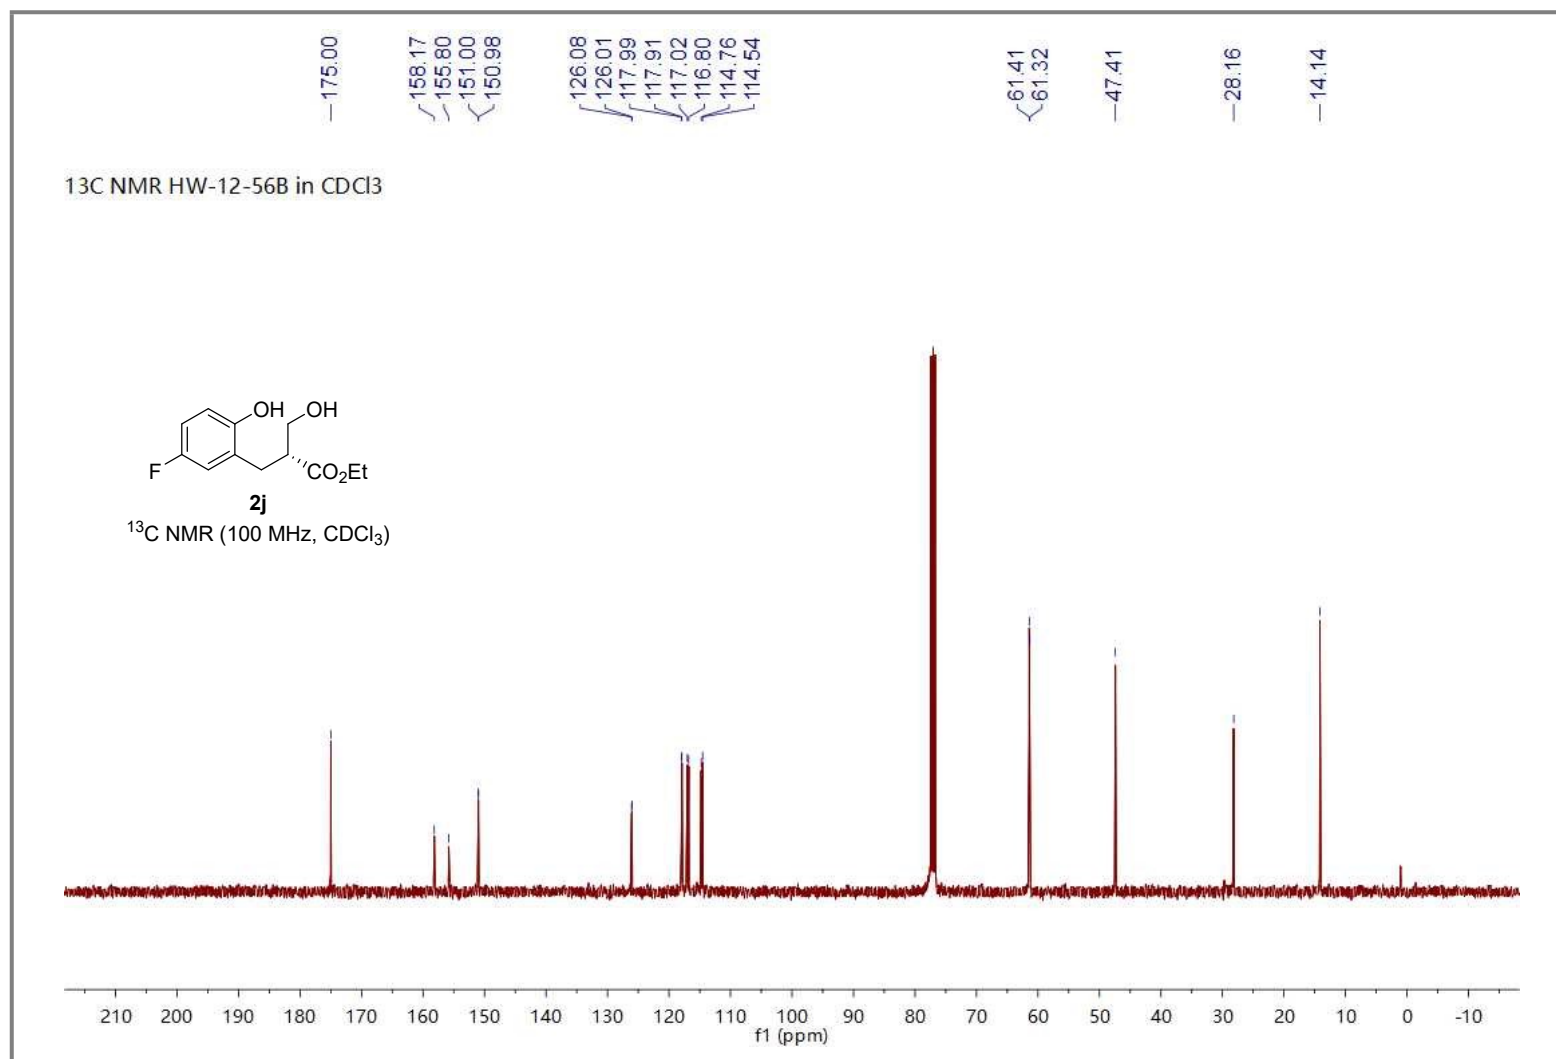

<sup>19</sup>F NMR HW-12-56B in CDCl<sub>3</sub>

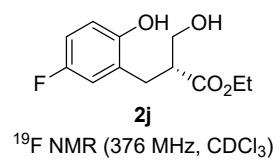

--124.0142

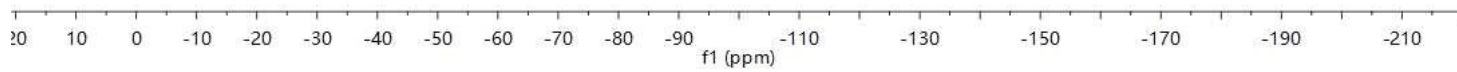

Data File C:\USERS\PUBLIC\DOCUMENTS\CHEMSTATION\1\DATA\2022\YZH002749 10-18-57.D  
 Sample Name: HW-12-56B+/-

=====  
 Acq. Operator : SYSTEM  
 Sample Operator : SYSTEM  
 Acq. Instrument : HPLC1260 II Location : 1  
 Injection Date : 11/8/2022 10:18:58 AM Inj : 1  
 Inj Volume : No inj  
 Acq. Method : C:\USERS\PUBLIC\DOCUMENTS\CHEMSTATION\1\METHODS\def\_LC1.M  
 Last changed : 11/8/2022 10:03:25 AM by SYSTEM  
 (modified after loading)  
 Analysis Method : C:\USERS\PUBLIC\DOCUMENTS\CHEMSTATION\1\METHODS\def\_LC1.M  
 Last changed : 11/29/2023 9:59:58 PM by SYSTEM  
 (modified after loading)  
 Sample Info : IB, Hexane/i-PrOH = 90/10, 0.8mL/min, 30 oC, 230 nm

Additional Info : Peak(s) manually integrated

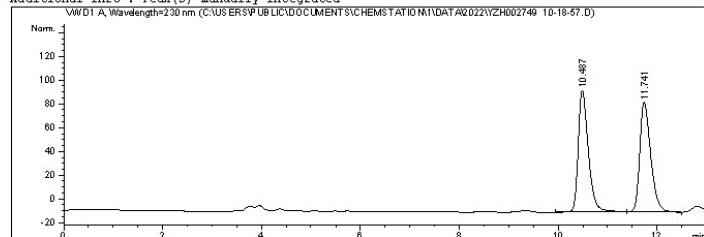

=====  
 Area Percent Report  
 =====

Sorted By : Signal  
 Multiplier : 1.0000  
 Dilution : 1.0000  
 Do not use Multiplier & Dilution Factor with ISTDs

Signal 1: VWD1 A, Wavelength=230 nm

| Peak # | RetTime [min] | Type | Width [min] | Area [mAU*s] | Height [mAU] | Area %  |
|--------|---------------|------|-------------|--------------|--------------|---------|
| 1      | 10.487        | BB   | 0.2155      | 1166.01672   | 82.20879     | 50.6514 |
| 2      | 11.741        | BB   | 0.2330      | 1136.02637   | 74.04032     | 49.3486 |

Totals : 2302.04309 156.24911

=====  
 \*\*\* End of Report \*\*\*

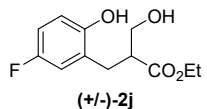

Data File C:\USERS\PUBLIC\DOCUMENTS\CHEMSTATION\1\DATA\2022\YZH002750 10-42-31.D  
 Sample Name: HW-12-56B

=====  
 Acq. Operator : SYSTEM  
 Sample Operator : SYSTEM  
 Acq. Instrument : HPLC1260 II Location : 1  
 Injection Date : 11/8/2022 10:42:32 AM Inj : 1  
 Inj Volume : No inj  
 Acq. Method : C:\USERS\PUBLIC\DOCUMENTS\CHEMSTATION\1\METHODS\def\_LC1.M  
 Last changed : 11/8/2022 10:03:25 AM by SYSTEM  
 (modified after loading)  
 Analysis Method : C:\USERS\PUBLIC\DOCUMENTS\CHEMSTATION\1\METHODS\def\_LC1.M  
 Last changed : 11/29/2023 9:50:01 PM by SYSTEM  
 (modified after loading)  
 Sample Info : IB, Hexane/i-PrOH = 90/10, 0.8mL/min, 30 oC, 230 nm

Additional Info : Peak(s) manually integrated

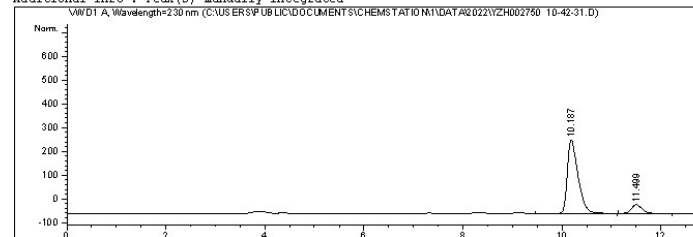

=====  
 Area Percent Report  
 =====

Sorted By : Signal  
 Multiplier : 1.0000  
 Dilution : 1.0000  
 Do not use Multiplier & Dilution Factor with ISTDs

Signal 1: VWD1 A, Wavelength=230 nm

| Peak # | RetTime [min] | Type | Width [min] | Area [mAU*s] | Height [mAU] | Area %  |
|--------|---------------|------|-------------|--------------|--------------|---------|
| 1      | 10.187        | VB R | 0.2271      | 2805.53760   | 186.94838    | 89.4030 |
| 2      | 11.499        | BB   | 0.2315      | 332.54401    | 21.98408     | 10.5970 |

Totals : 3138.08160 208.93246

=====  
 \*\*\* End of Report \*\*\*

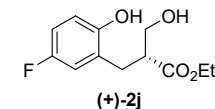

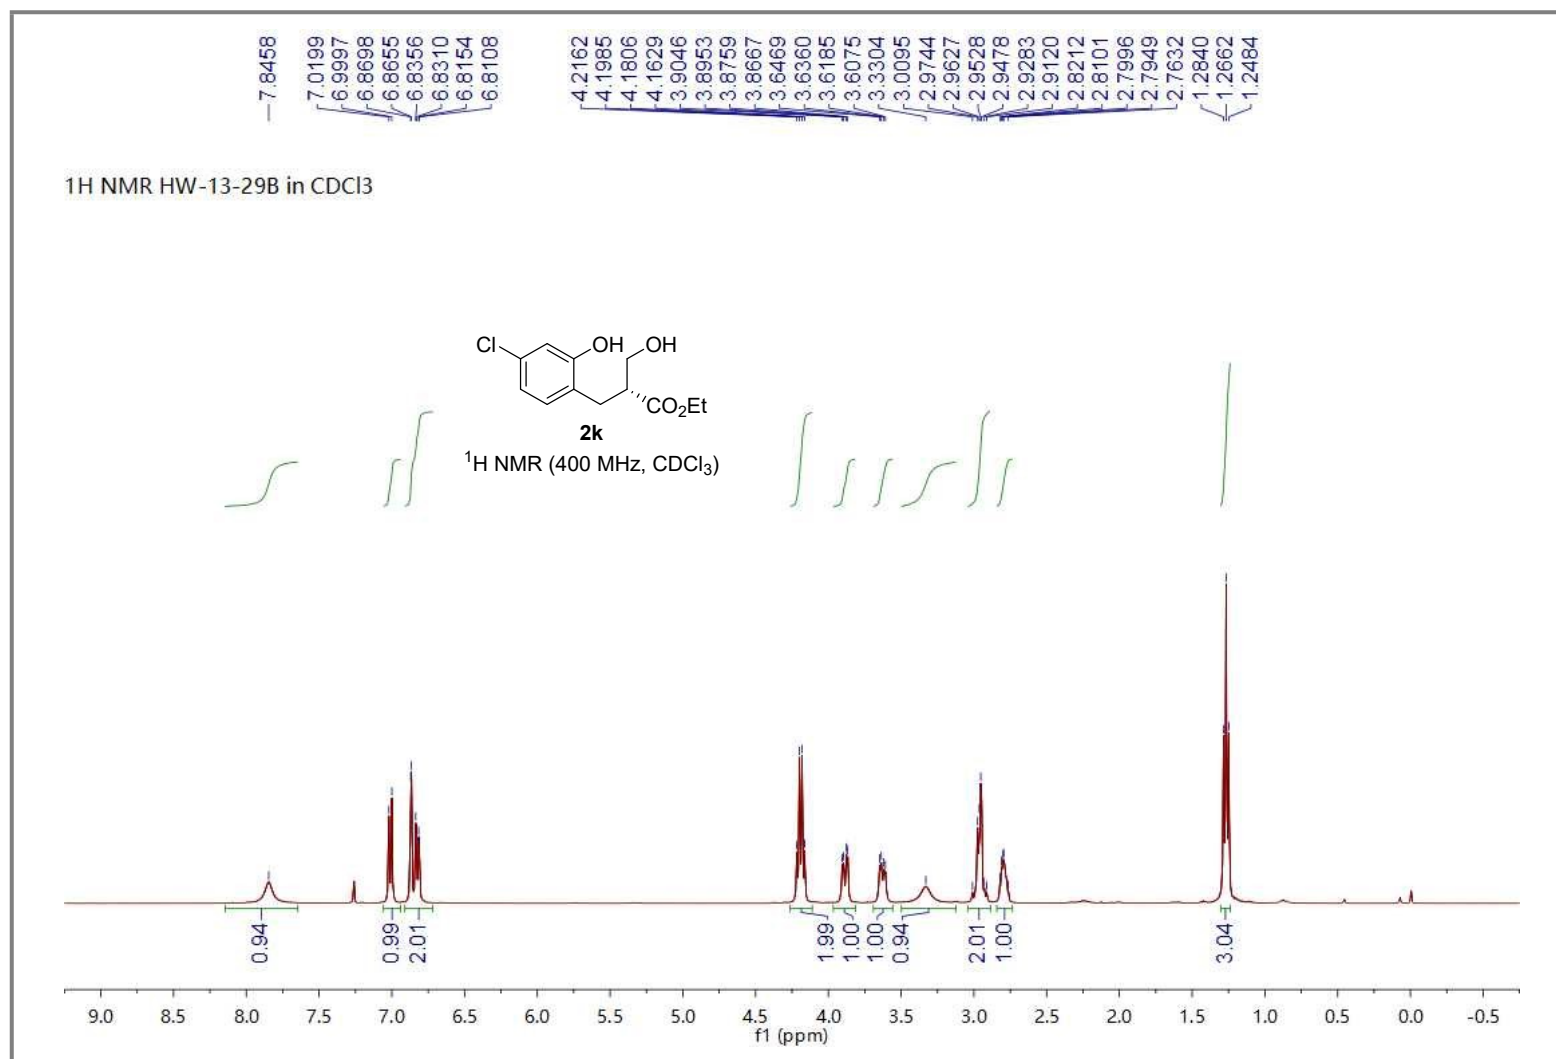

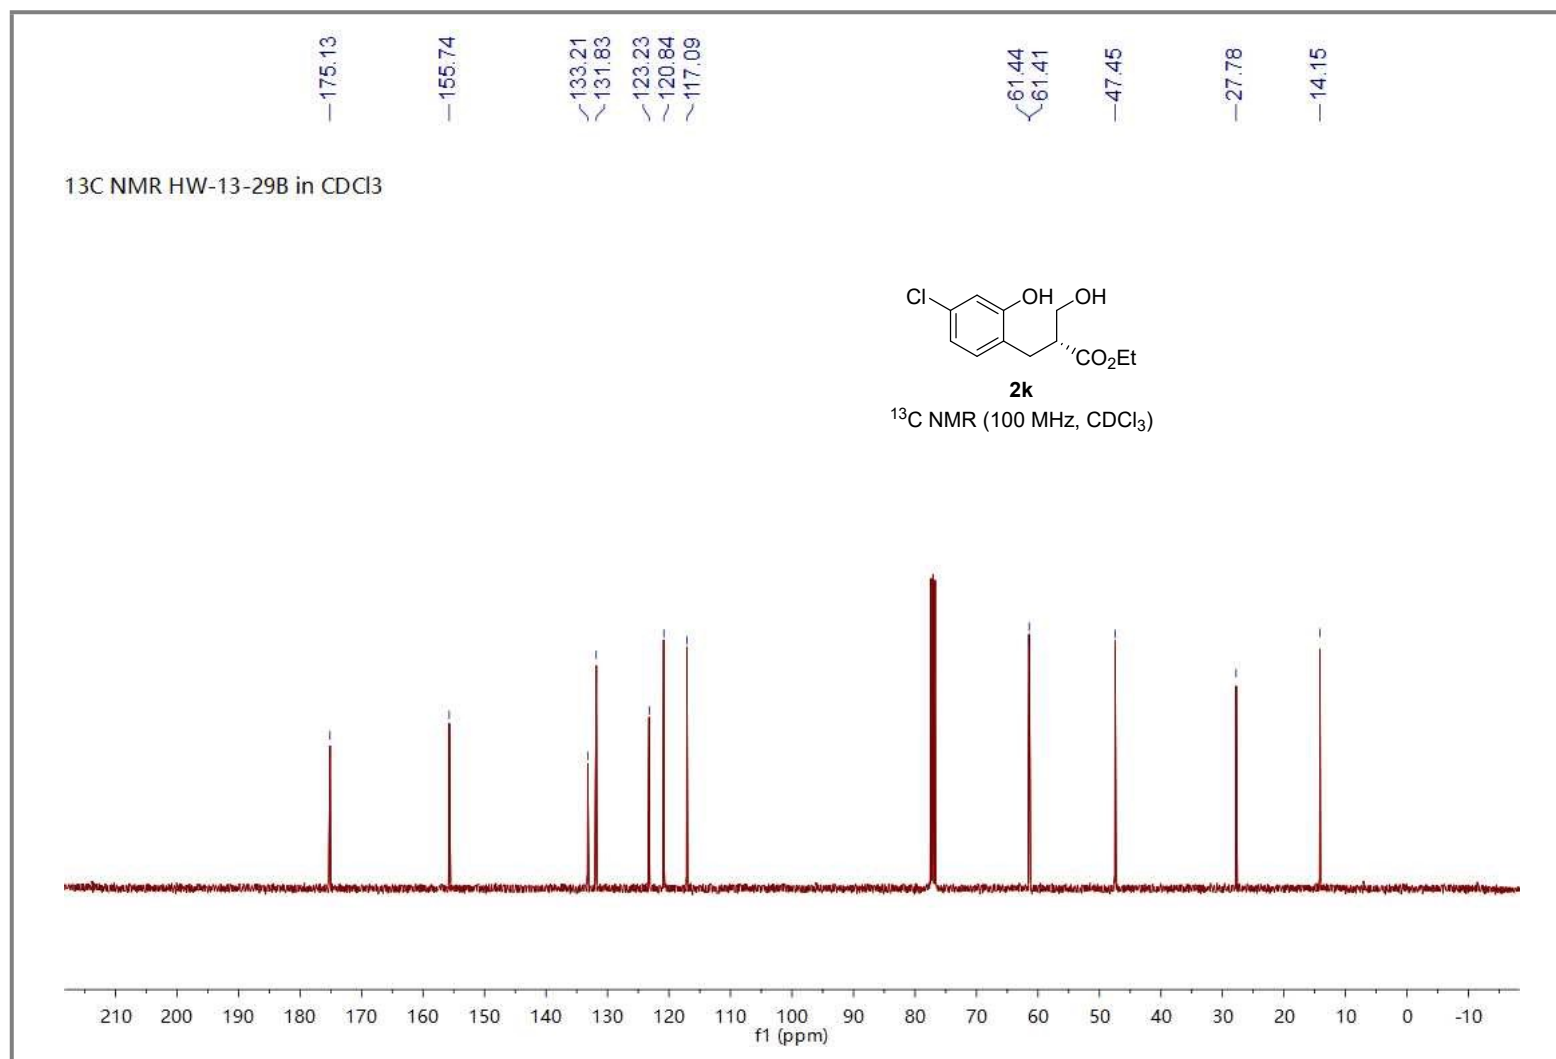

Data File C:\CHEM32\1\DATA\ZHOU-22\YZN022314.D  
 Sample Name: HW-13-29B+/-

=====  
 Acq. Operator :  
 Acq. Instrument : Instrument 1 Location : -  
 Injection Date : 1/4/2023 3:46:49 AM  
 Acq. Method : C:\CHEM32\1\METHODS\DEF\_LC.M  
 Last changed : 1/4/2023 3:44:39 AM  
 (modified after loading)  
 Analysis Method : C:\CHEM32\1\METHODS\DEF\_LC.M  
 Last changed : 11/30/2023 8:56:32 AM  
 (modified after loading)  
 Sample Info : AS-H, Hexane/i-PrOH = 90/10, 0.8 mL/min, 30 oC, 230 nm

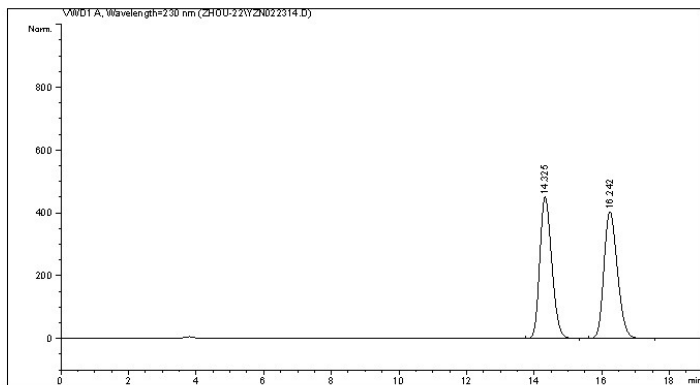

=====  
 Area Percent Report  
 =====

Sorted By : Signal  
 Multiplier: : 1.0000  
 Dilution: : 1.0000  
 Use Multiplier & Dilution Factor with ISTDs

Signal 1: VWD1 A, Wavelength=230 nm

| Peak # | RetTime [min] | Type | Width [min] | Area mAU  | Height %s | Area [mAU] | Area % |
|--------|---------------|------|-------------|-----------|-----------|------------|--------|
| 1      | 14.325        | BB   | 0.3834      | 1.10519e4 | 448.83185 | 49.8610    |        |
| 2      | 16.242        | BB   | 0.4294      | 1.11136e4 | 403.14838 | 50.1390    |        |

Totals : 2.21655e4 851.98022

=====  
 \*\*\* End of Report \*\*\*

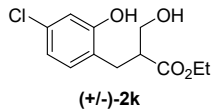

Instrument 1 11/30/2023 8:56:36 AM

Page 1 of 1

Data File C:\CHEM32\1\DATA\ZHOU-22\YZN022315.D  
 Sample Name: HW-13-29B

=====  
 Acq. Operator :  
 Acq. Instrument : Instrument 1 Location : -  
 Injection Date : 1/4/2023 4:16:05 AM  
 Acq. Method : C:\CHEM32\1\METHODS\DEF\_LC.M  
 Last changed : 1/4/2023 4:15:23 AM  
 (modified after loading)  
 Analysis Method : C:\CHEM32\1\METHODS\DEF\_LC.M  
 Last changed : 10/17/2023 10:25:01 PM  
 (modified after loading)  
 Sample Info : AS-H, Hexane/i-PrOH = 90/10, 0.8 mL/min, 30 oC, 230 nm

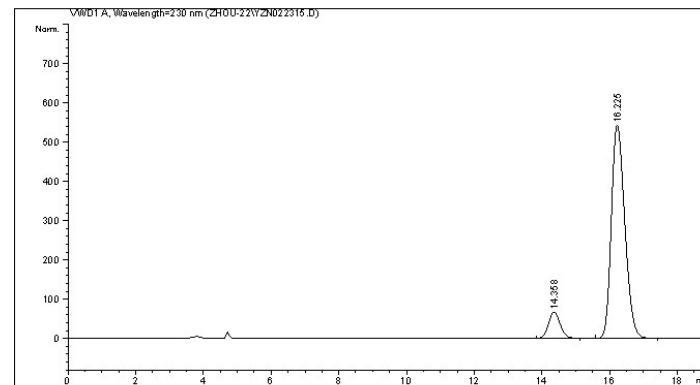

=====  
 Area Percent Report  
 =====

Sorted By : Signal  
 Multiplier: : 1.0000  
 Dilution: : 1.0000  
 Use Multiplier & Dilution Factor with ISTDs

Signal 1: VWD1 A, Wavelength=230 nm

| Peak # | RetTime [min] | Type | Width [min] | Area mAU   | Height %s | Area [mAU] | Area % |
|--------|---------------|------|-------------|------------|-----------|------------|--------|
| 1      | 14.358        | BB   | 0.3654      | 1571.00635 | 66.62236  | 9.5166     |        |
| 2      | 16.225        | BB   | 0.4290      | 1.49370e4  | 542.43024 | 90.4834    |        |

Totals : 1.65081e4 609.05260

=====  
 \*\*\* End of Report \*\*\*

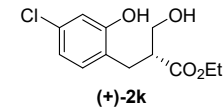

Instrument 1 10/17/2023 10:25:04 PM

Page 1 of 1



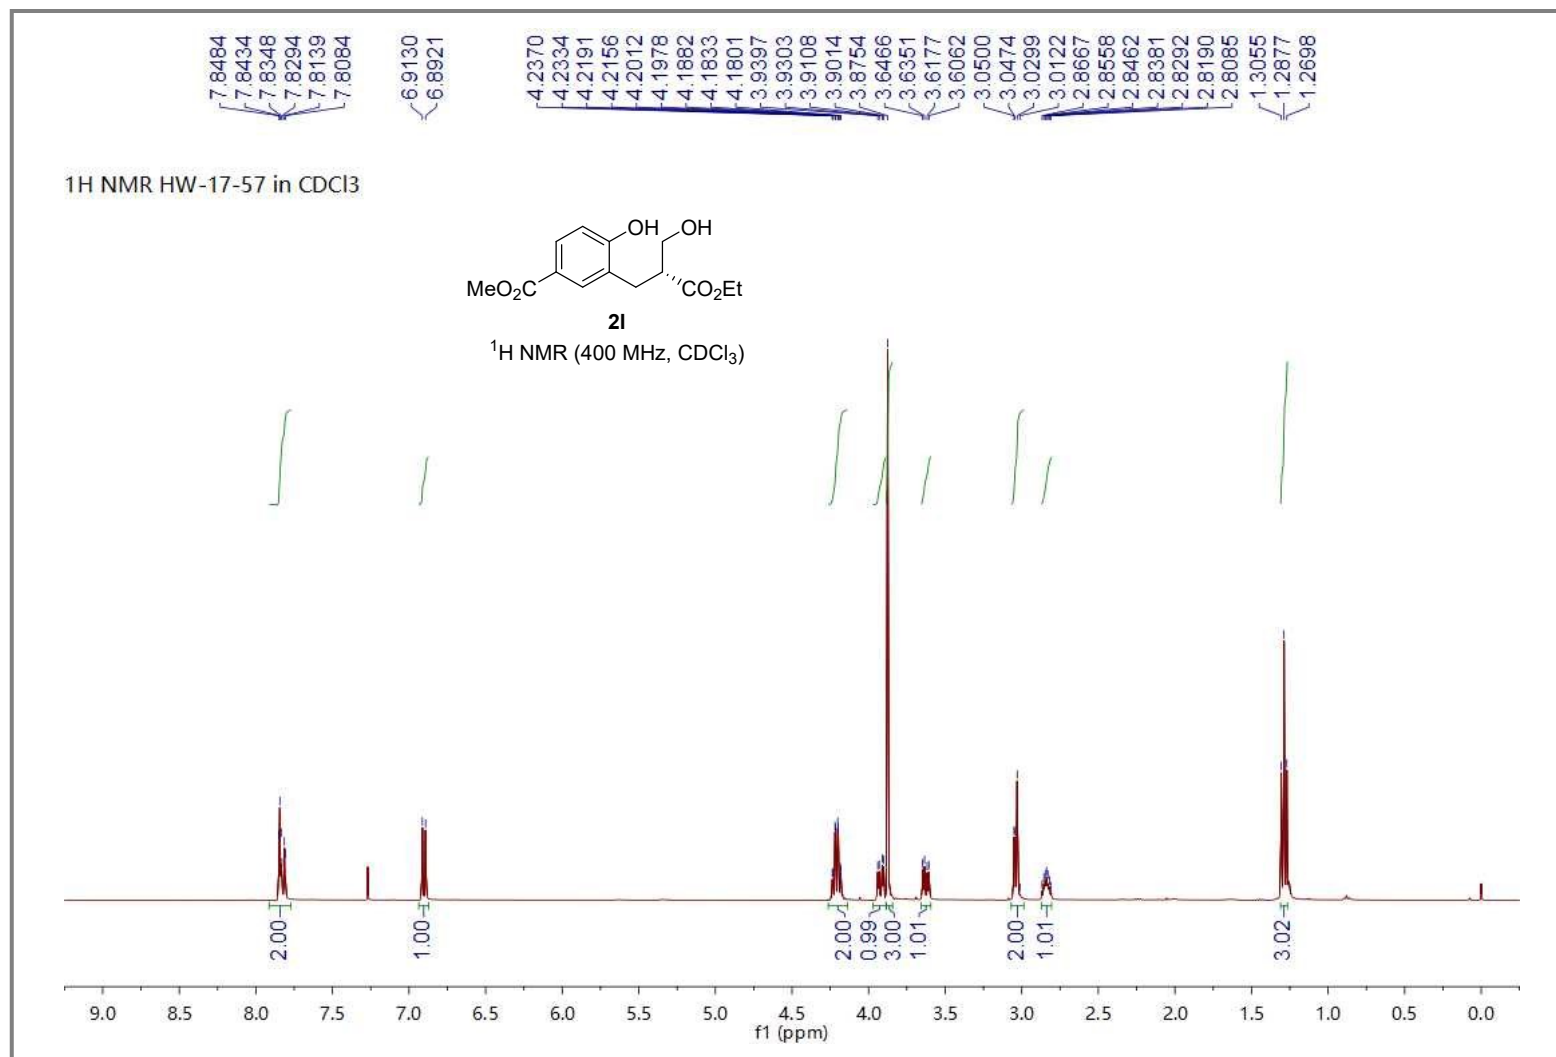

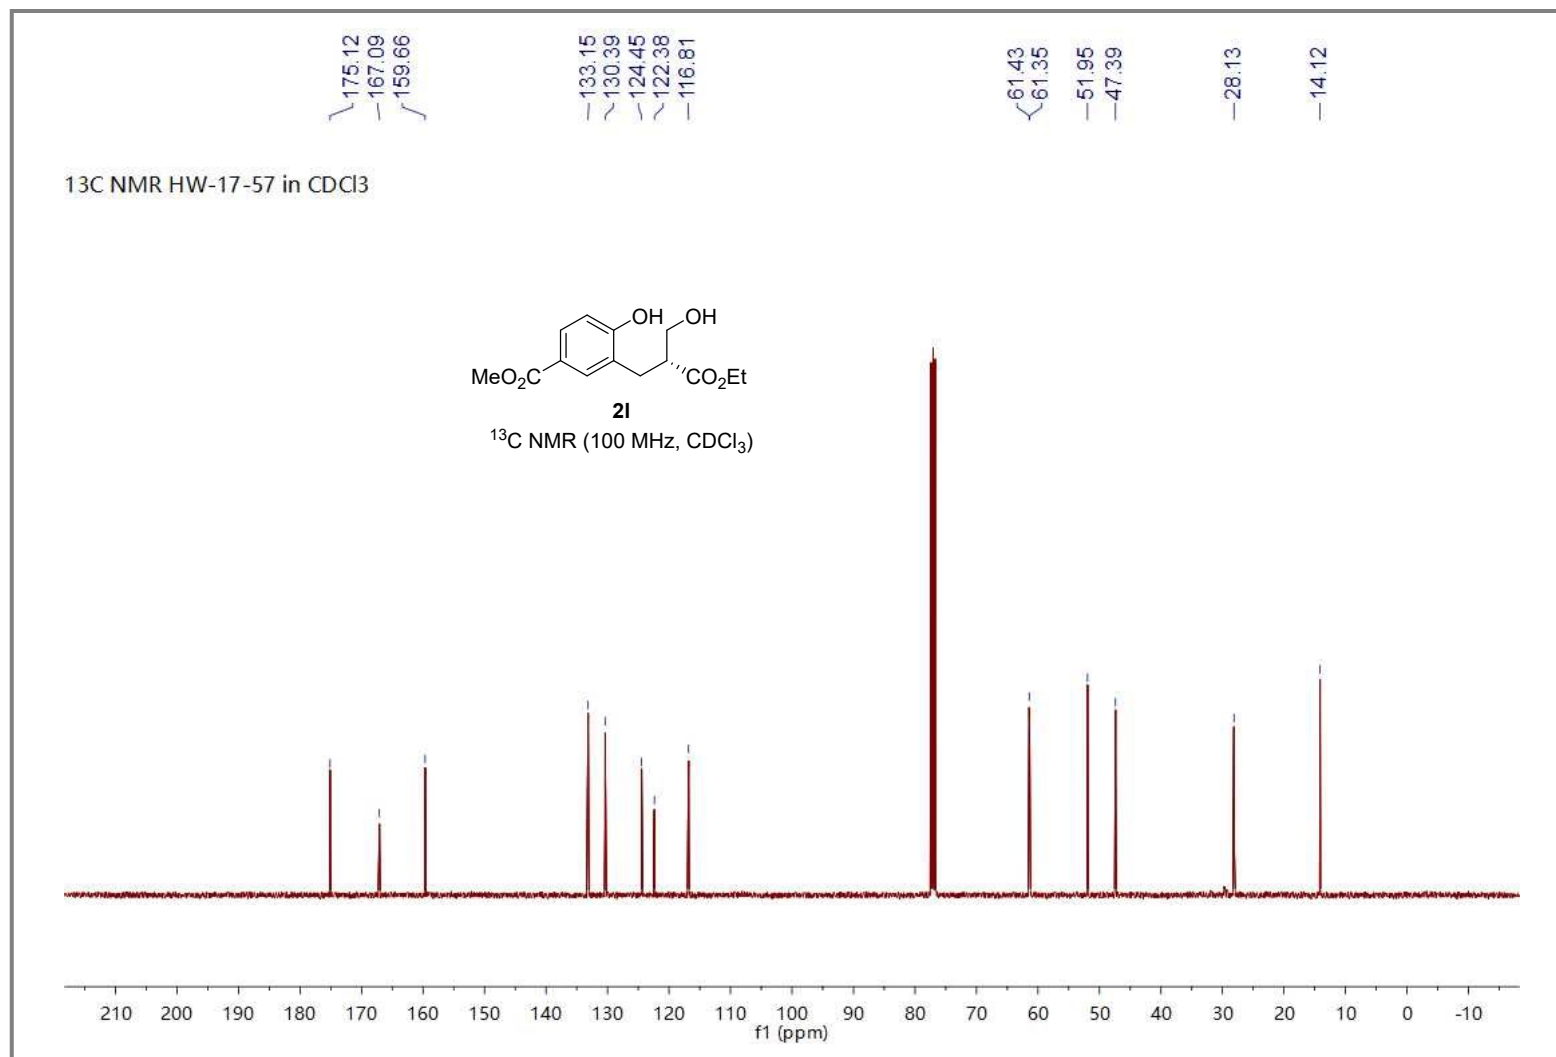

Data File C:\CHEM32\1\DATA\ZHOU-24\YZN025805.D  
 Sample Name: HW-17-57+/-

=====  
 Acq. Operator :  
 Acq. Instrument : Instrument 1 Location : -  
 Injection Date : 5/9/2024 8:51:28 AM  
 Acq. Method : C:\CHEM32\1\METHODS\DEF\_LC.M  
 Last changed : 5/9/2024 8:50:44 AM  
 (modified after loading)  
 Analysis Method : C:\CHEM32\1\METHODS\DEF\_LC.M  
 Last changed : 5/9/2024 9:31:41 AM  
 (modified after loading)  
 Sample Info : AS-H, Hexane/iPrOH = 90/10, 0.8 mL/min, 30 oC, 254 nm.

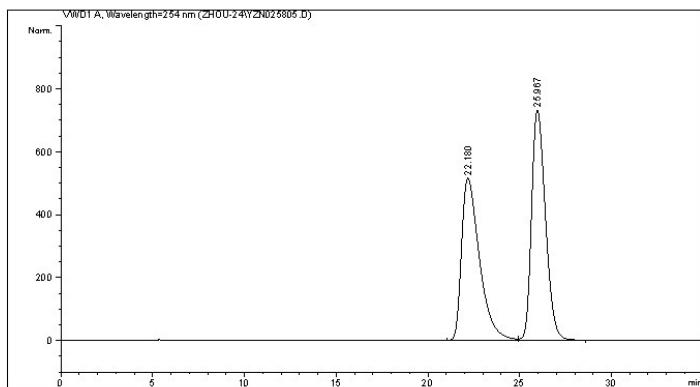

=====  
 Area Percent Report  
 =====

Sorted By : Signal  
 Multiplier: : 1.0000  
 Dilution: : 1.0000  
 Sample Amount: : 1.00000 [ng/ul] (not used in calc.)  
 Use Multiplier & Dilution Factor with ISTDs

Signal 1: VWD1 A, Wavelength=254 nm

| Peak # | RetTime [min] | Type | Width  | Area      | %s | Height    | Area    | % |
|--------|---------------|------|--------|-----------|----|-----------|---------|---|
|        |               |      | [min]  | [mAU]     |    | [mAU]     |         |   |
| 1      | 22.180        | BV   | 1.0273 | 3.49369e4 |    | 515.97540 | 47.6093 |   |
| 2      | 25.967        | VB   | 0.8152 | 3.84456e4 |    | 731.93768 | 52.3907 |   |

Totals : 7.33825e4 1247.91309

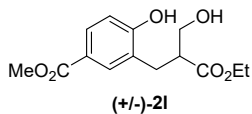

=====  
 \*\*\* End of Report \*\*\*

Data File C:\CHEM32\1\DATA\ZHOU-24\YZN025804.D  
 Sample Name: HW-17-57

=====  
 Acq. Operator :  
 Acq. Instrument : Instrument 1 Location : -  
 Injection Date : 5/9/2024 8:14:25 AM  
 Acq. Method : C:\CHEM32\1\METHODS\DEF\_LC.M  
 Last changed : 5/9/2024 8:06:52 AM  
 (modified after loading)  
 Analysis Method : C:\CHEM32\1\METHODS\DEF\_LC.M  
 Last changed : 5/9/2024 9:31:16 AM  
 (modified after loading)  
 Sample Info : AS-H, Hexane/iPrOH = 90/10, 0.8 mL/min, 30 oC, 254 nm.

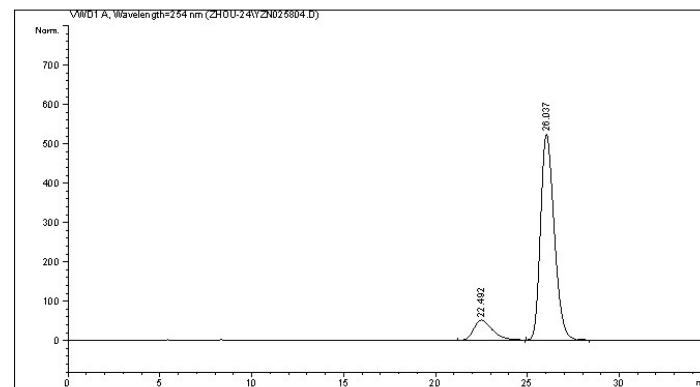

=====  
 Area Percent Report  
 =====

Sorted By : Signal  
 Multiplier: : 1.0000  
 Dilution: : 1.0000  
 Sample Amount: : 1.00000 [ng/ul] (not used in calc.)  
 Use Multiplier & Dilution Factor with ISTDs

Signal 1: VWD1 A, Wavelength=254 nm

| Peak # | RetTime [min] | Type | Width  | Area       | %s | Height    | Area    | % |
|--------|---------------|------|--------|------------|----|-----------|---------|---|
|        |               |      | [min]  | [mAU]      |    | [mAU]     |         |   |
| 1      | 22.492        | BB   | 1.0688 | 3635.62256 |    | 51.19103  | 11.8524 |   |
| 2      | 26.037        | BB   | 0.8015 | 2.70386e4  |    | 522.73462 | 88.1476 |   |

Totals : 3.06742e4 573.92565

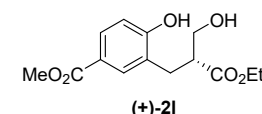

=====  
 \*\*\* End of Report \*\*\*

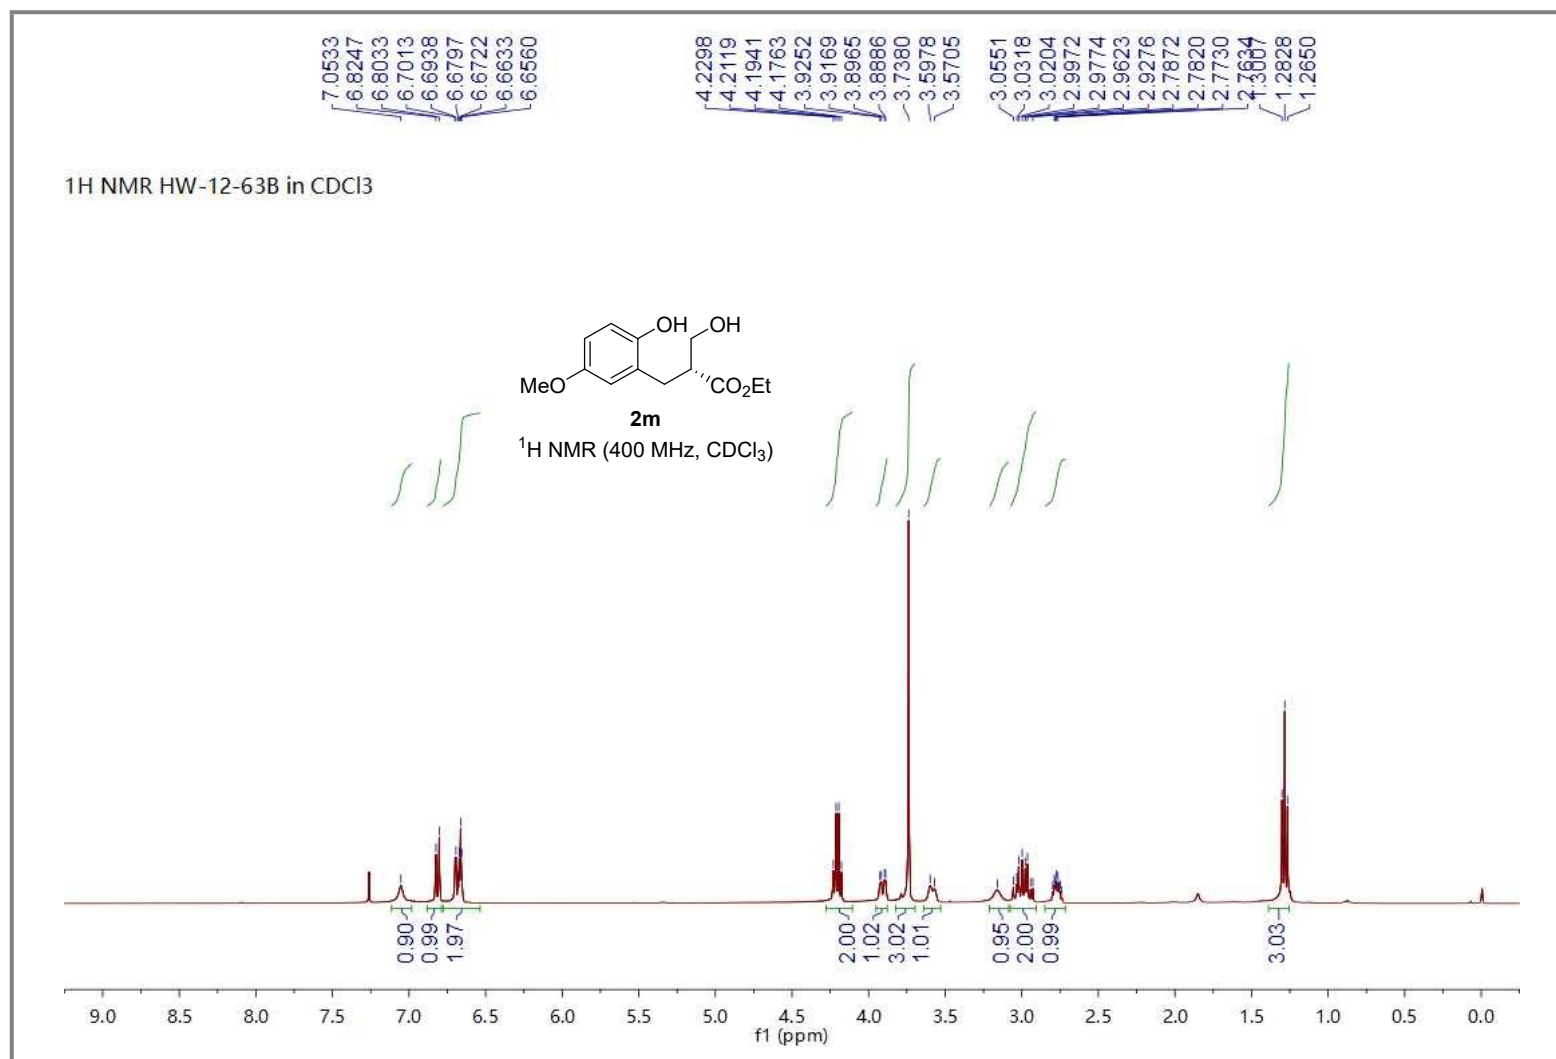

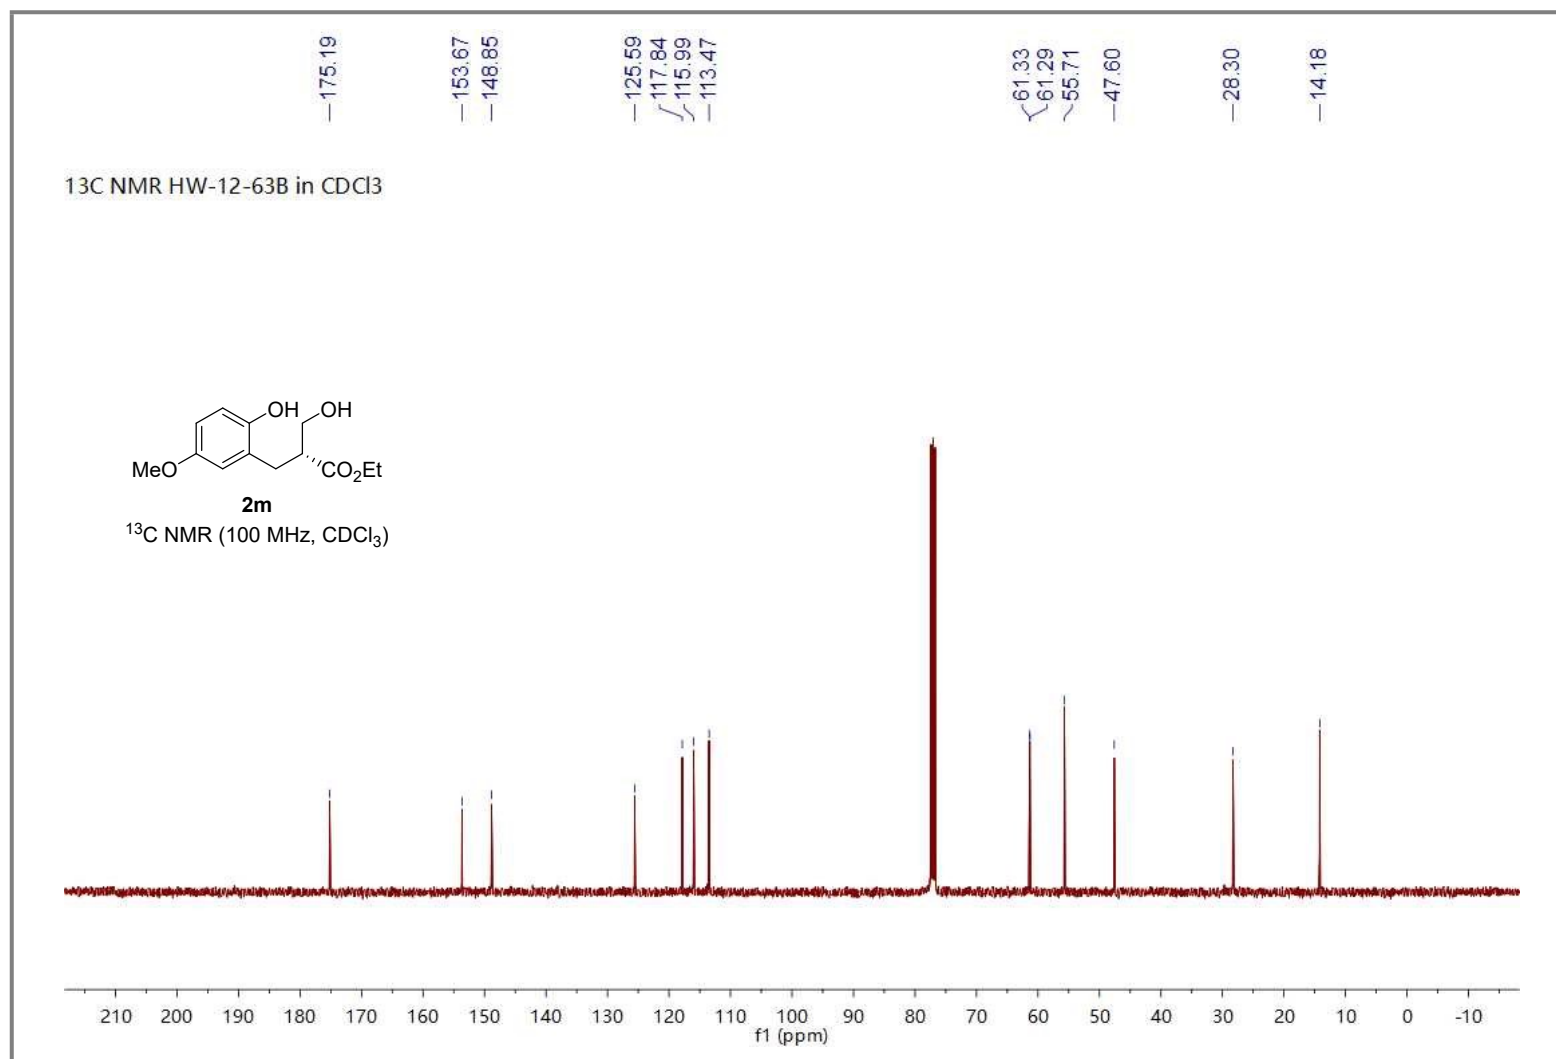

Data File C:\USERS\PUBLIC\DOCUMENTS\CHEMSTATION\1\DATA\2022\YZH002818 20-41-43.D  
 Sample Name: HW-12-63B+/-

```

=====
Acq. Operator   : SYSTEM
Sample Operator : SYSTEM
Acq. Instrument : HPLC1260 II           Location : 1
Injection Date  : 11/14/2022 8:41:43 PM Inj       : 1
                                           Inj Volume: No inj
Acq. Method     : C:\USERS\PUBLIC\DOCUMENTS\CHEMSTATION\1\METHODS\def_LC1.M
Last changed    : 11/14/2022 8:05:07 PM by SYSTEM
                 (modified after loading)
Analysis Method : C:\USERS\PUBLIC\DOCUMENTS\CHEMSTATION\1\METHODS\def_LC1.M
Last changed    : 10/17/2023 10:42:41 AM by SYSTEM
                 (modified after loading)
Sample Info     : AS-H, Hexane/1-PrOH = 90/10, 0.8 mL/min, 30 oC, 230 nm
  
```

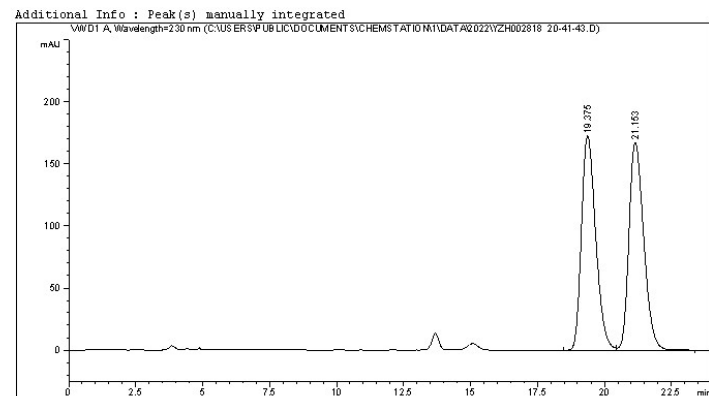

Area Percent Report

```

Sorted By      : Signal
Multiplier     : 1.0000
Dilution       : 1.0000
Do not use Multiplier & Dilution Factor with ISTDs
  
```

Signal 1: VWD1 A, Wavelength=230 nm

| Peak # | RetTime [min] | Type | Width [min] | Area [mAU*s] | Height [mAU] | Area %  |
|--------|---------------|------|-------------|--------------|--------------|---------|
| 1      | 19.375        | BV   | 0.5713      | 6360.90137   | 172.46037    | 49.8071 |
| 2      | 21.153        | VB   | 0.5951      | 6410.17627   | 167.28079    | 50.1929 |

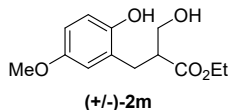

Data File C:\USERS\PUBLIC\DOCUMENTS\CHEMSTATION\1\DATA\2022\YZH002819 21-06-43.D  
 Sample Name: HW-12-63B

```

=====
Acq. Operator   : SYSTEM
Sample Operator : SYSTEM
Acq. Instrument : HPLC1260 II           Location : 1
Injection Date  : 11/14/2022 9:06:43 PM Inj       : 1
                                           Inj Volume: No inj
Acq. Method     : C:\USERS\PUBLIC\DOCUMENTS\CHEMSTATION\1\METHODS\def_LC1.M
Last changed    : 11/14/2022 8:05:07 PM by SYSTEM
                 (modified after loading)
Analysis Method : C:\USERS\PUBLIC\DOCUMENTS\CHEMSTATION\1\METHODS\def_LC1.M
Last changed    : 10/17/2023 10:42:41 AM by SYSTEM
                 (modified after loading)
Sample Info     : AS-H, Hexane/1-PrOH = 90/10, 0.8 mL/min, 30 oC, 230 nm
  
```

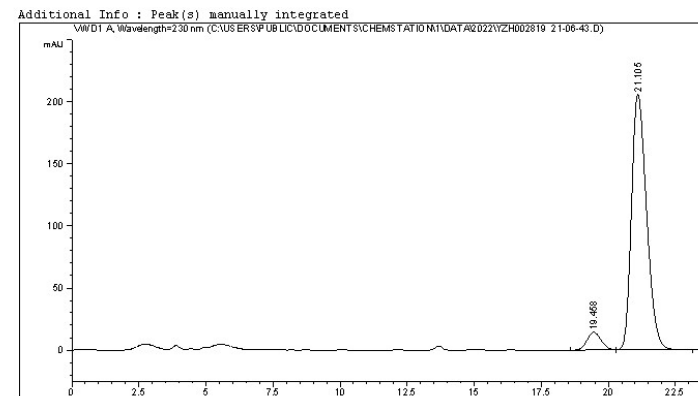

Area Percent Report

```

Sorted By      : Signal
Multiplier     : 1.0000
Dilution       : 1.0000
Do not use Multiplier & Dilution Factor with ISTDs
  
```

Signal 1: VWD1 A, Wavelength=230 nm

| Peak # | RetTime [min] | Type | Width [min] | Area [mAU*s] | Height [mAU] | Area %  |
|--------|---------------|------|-------------|--------------|--------------|---------|
| 1      | 19.458        | BB   | 0.5670      | 513.02692    | 14.18275     | 6.0063  |
| 2      | 21.105        | BB   | 0.6060      | 8028.38330   | 205.41820    | 93.9937 |

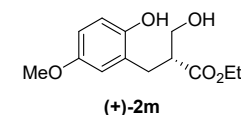

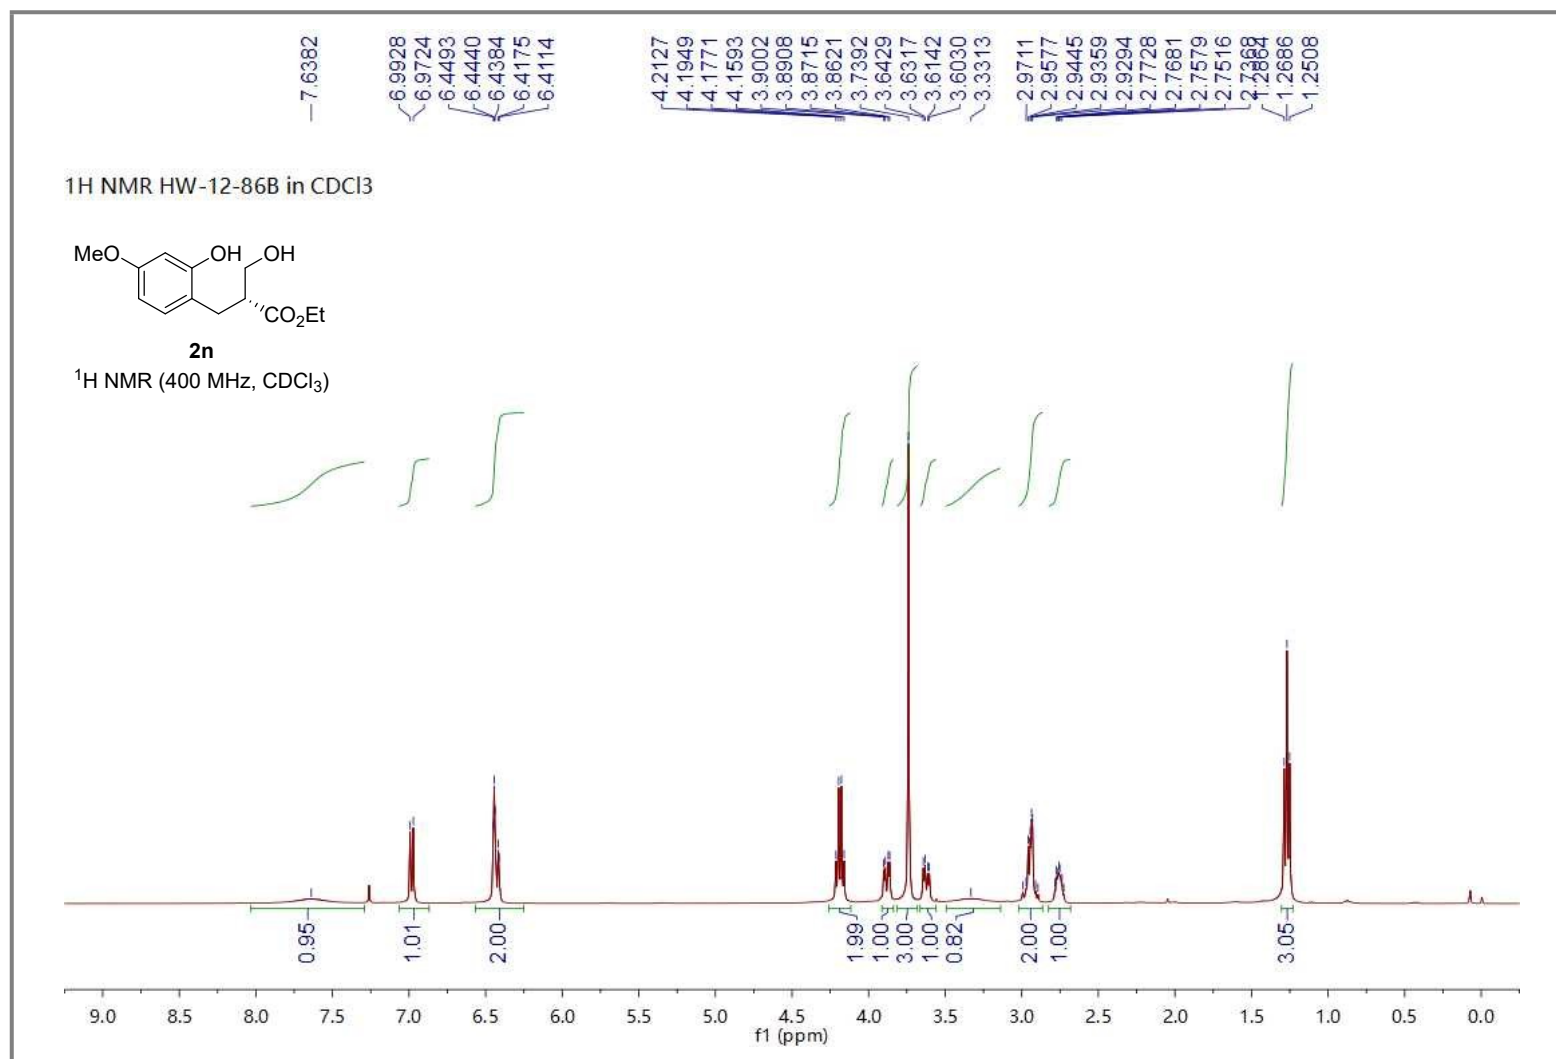

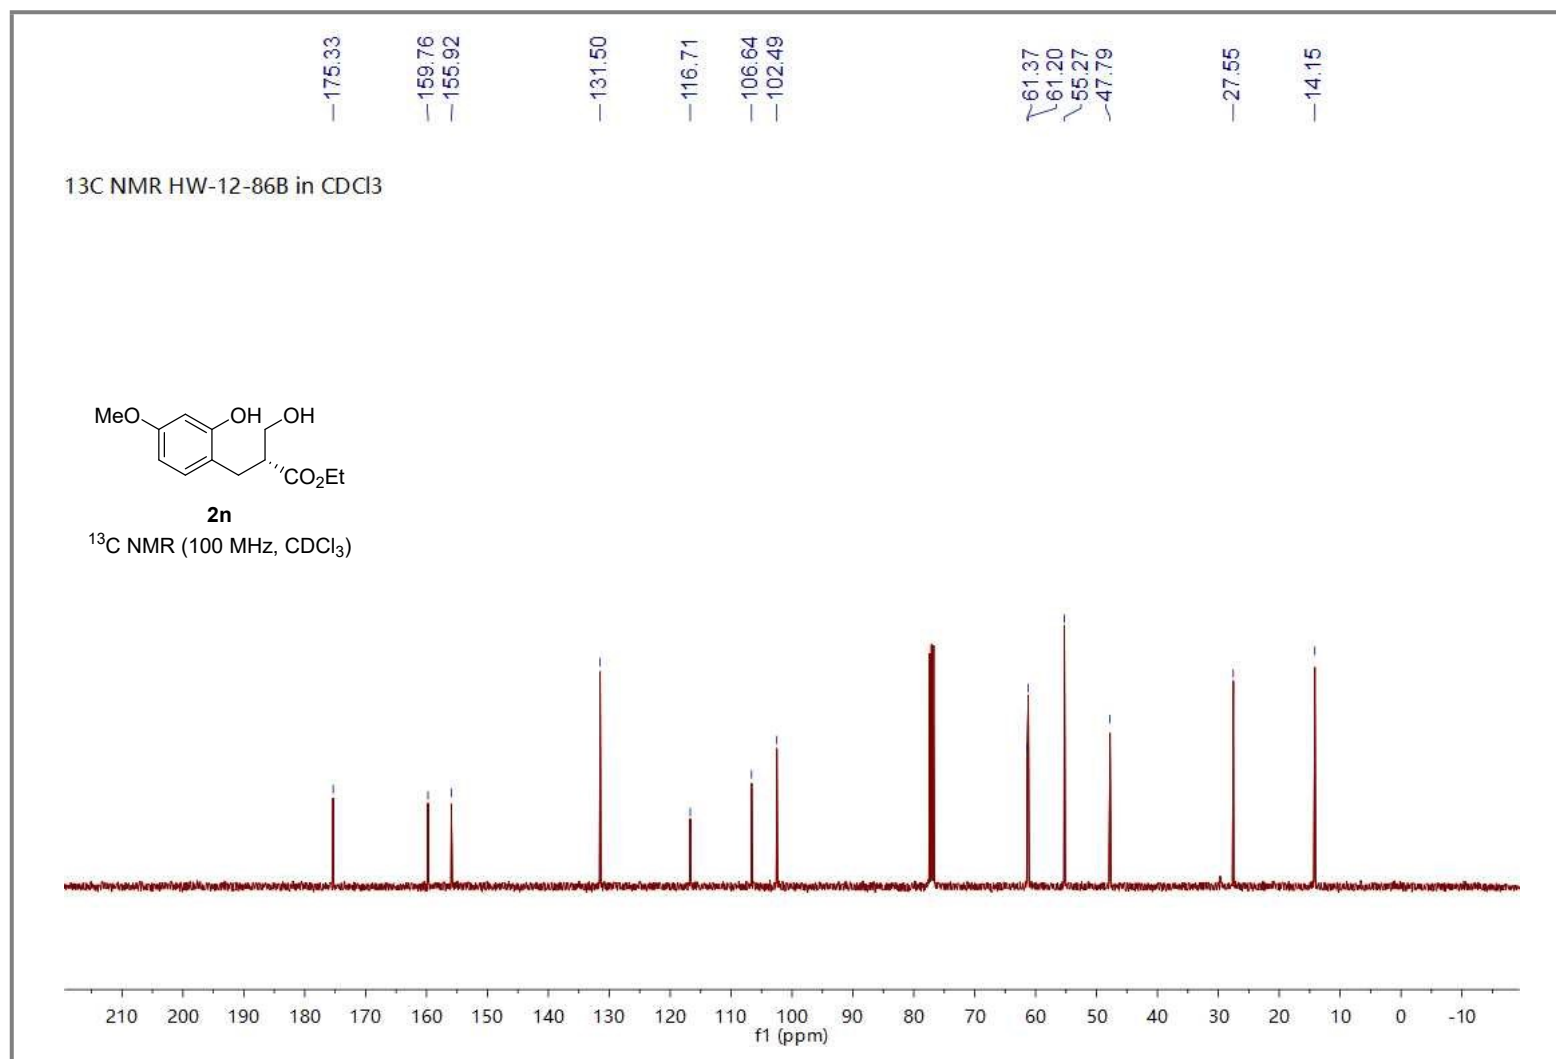



Data File C:\CHEM32\1\DATA\ZHOU-22\YZN022169.D  
 Sample Name: HW-12-86B+/-

=====  
 Acq. Operator :  
 Acq. Instrument : Instrument 1 Location : -  
 Injection Date : 12/5/2022 9:44:16 PM  
 Acq. Method : C:\CHEM32\1\METHODS\DEF\_LC.M  
 Last changed : 12/5/2022 9:43:45 PM  
 (modified after loading)  
 Analysis Method : C:\CHEM32\1\METHODS\DEF\_LC.M  
 Last changed : 10/17/2023 10:35:13 PM  
 (modified after loading)  
 Sample Info : IB, Hexane/i-PrOH = 95/5, 0.8 mL/min, 30 oC, 230 nm

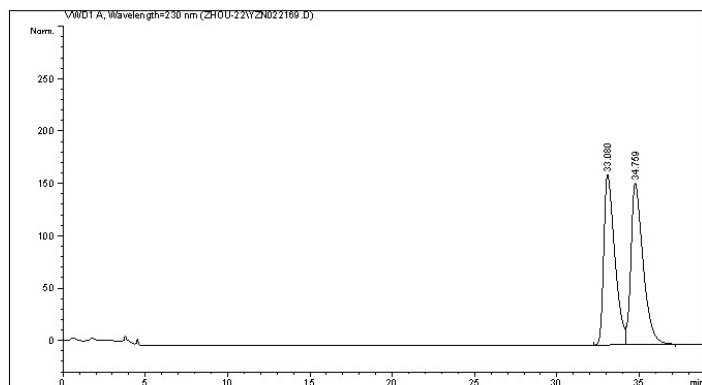

=====  
 Area Percent Report  
 =====

Sorted By : Signal  
 Multiplier: : 1.0000  
 Dilution: : 1.0000  
 Use Multiplier & Dilution Factor with ISTDs

Signal 1: VWD1 A, Wavelength=230 nm

| Peak # | RetTime [min] | Type | Width [min] | Area [mAU] | Height [mAU] | Area %  |
|--------|---------------|------|-------------|------------|--------------|---------|
| 1      | 33.080        | BV   | 0.6963      | 7529.39307 | 162.53297    | 48.7565 |
| 2      | 34.759        | VB   | 0.7740      | 7913.44580 | 154.42337    | 51.2435 |

Totals : 1.54428e4 316.95634

=====  
 \*\*\* End of Report \*\*\*

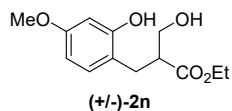

Data File C:\CHEM32\1\DATA\ZHOU-22\YZN022170.D  
 Sample Name: HW-12-86

=====  
 Acq. Operator :  
 Acq. Instrument : Instrument 1 Location : -  
 Injection Date : 12/5/2022 10:24:58 PM  
 Acq. Method : C:\CHEM32\1\METHODS\DEF\_LC.M  
 Last changed : 12/5/2022 10:24:06 PM  
 (modified after loading)  
 Analysis Method : C:\CHEM32\1\METHODS\DEF\_LC.M  
 Last changed : 10/17/2023 10:39:39 PM  
 (modified after loading)  
 Sample Info : IB, Hexane/i-PrOH = 95/5, 0.8 mL/min, 30 oC, 230 nm

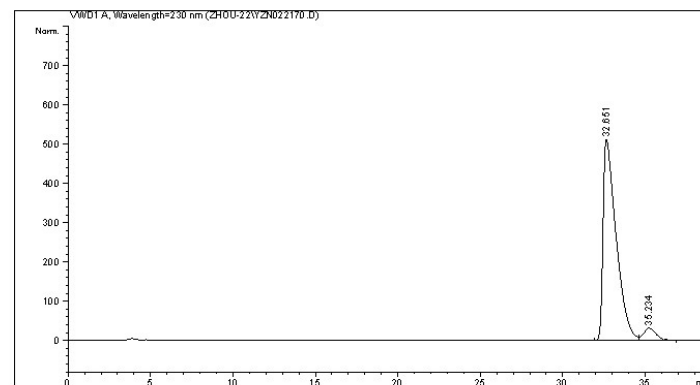

=====  
 Area Percent Report  
 =====

Sorted By : Signal  
 Multiplier: : 1.0000  
 Dilution: : 1.0000  
 Use Multiplier & Dilution Factor with ISTDs

Signal 1: VWD1 A, Wavelength=230 nm

| Peak # | RetTime [min] | Type | Width [min] | Area [mAU]  | Height [mAU] | Area %  |
|--------|---------------|------|-------------|-------------|--------------|---------|
| 1      | 32.651        | BV   | 0.7691      | 2,803,484.4 | 512.62573    | 94.5243 |
| 2      | 35.234        | VB   | 0.7861      | 1624.01208  | 31.21306     | 5.4757  |

Totals : 2.96588e4 543.83879

=====  
 \*\*\* End of Report \*\*\*

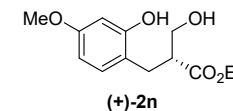

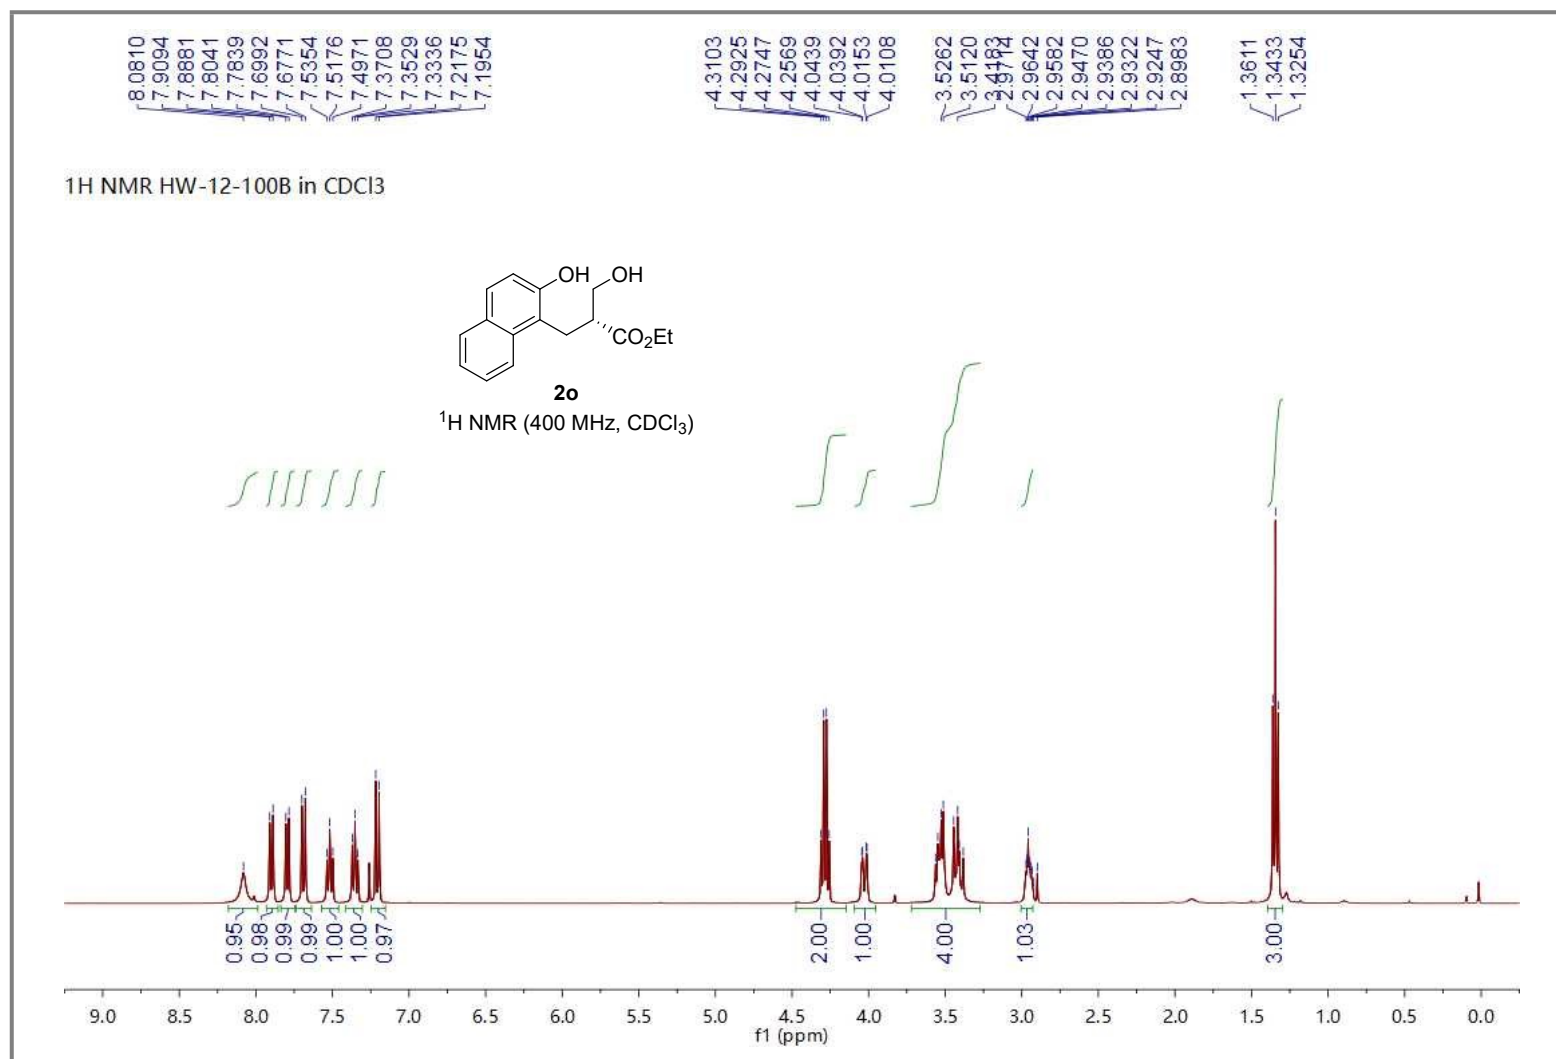

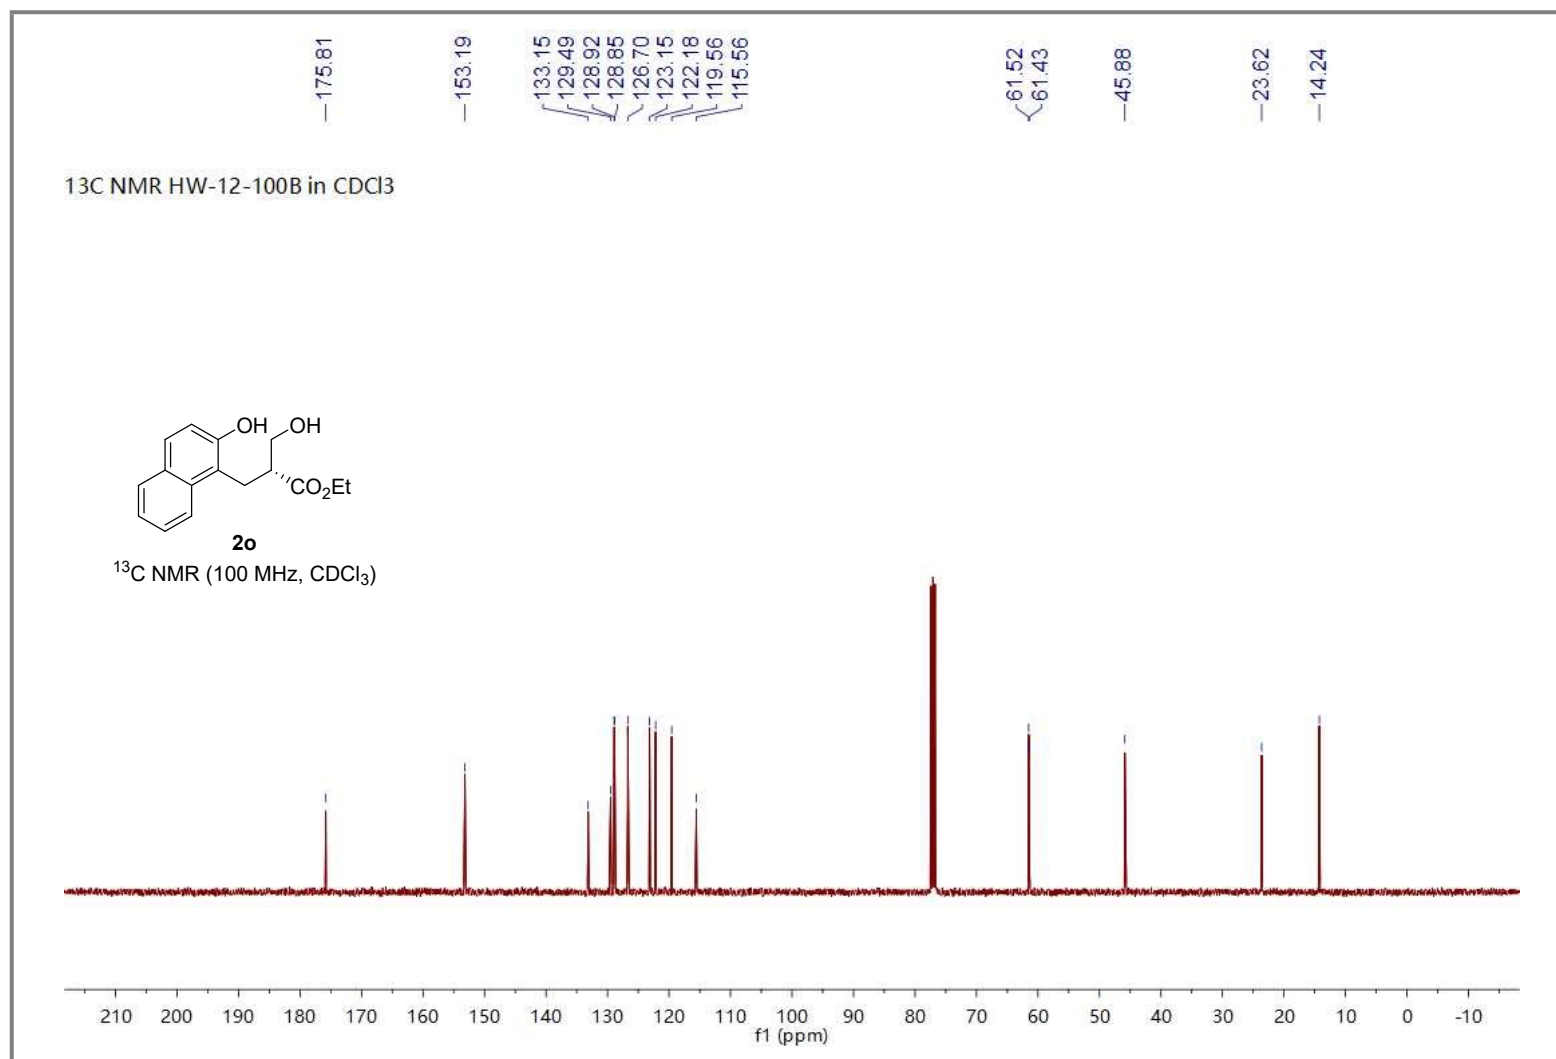

Data File C:\USERS\PUBLIC\DOCUMENTS\CHEMSTATION\1\DATA\2022\YZH003090 17-00-20.D  
 Sample Name: HW-12-100B+/-

```

=====
Acq. Operator   : SYSTEM
Sample Operator : SYSTEM
Acq. Instrument : HPLC1260 II           Location : 1
Injection Date  : 12/20/2022 5:00:20 PM Inj       : 1
                                           Inj Volume: No inj
Acq. Method    : C:\USERS\PUBLIC\DOCUMENTS\CHEMSTATION\1\METHODS\def_LC1.M
Last changed   : 12/20/2022 3:36:44 PM by SYSTEM
                                           (modified after loading)
Analysis Method: C:\USERS\PUBLIC\DOCUMENTS\CHEMSTATION\1\METHODS\def_LC1.M
Last changed   : 10/17/2023 10:56:22 AM by SYSTEM
                                           (modified after loading)
Sample Info    : AS-H, Hexane/1-PrOH = 90/10, 0.8 mL/min, 30 oC, 230 nm
  
```

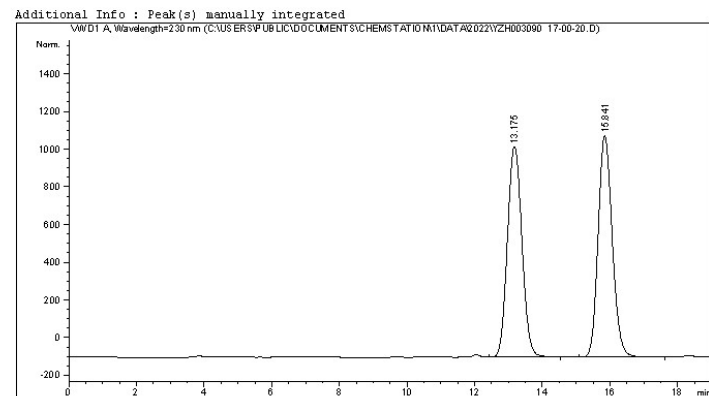

Area Percent Report

```

Sorted By      : Signal
Multiplier    : 1.0000
Dilution      : 1.0000
Do not use Multiplier & Dilution Factor with ISTDs
  
```

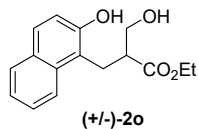

Signal 1: VWD1 A, Wavelength=230 nm

| Peak # | RetTime [min] | Type | Width [min] | Area [mAU*s] | Height [mAU] | Area %  |
|--------|---------------|------|-------------|--------------|--------------|---------|
| 1      | 13.175        | BB   | 0.4682      | 2.73494e4    | 918.88074    | 49.3684 |
| 2      | 15.841        | BB   | 0.4508      | 2.80491e4    | 965.84302    | 50.6316 |

Data File C:\USERS\PUBLIC\DOCUMENTS\CHEMSTATION\1\DATA\2022\YZH003092 18-42-40.D  
 Sample Name: HW-12-100B

```

=====
Acq. Operator   : SYSTEM
Sample Operator : SYSTEM
Acq. Instrument : HPLC1260 II           Location : 1
Injection Date  : 12/20/2022 6:42:40 PM Inj       : 1
                                           Inj Volume: No inj
Acq. Method    : C:\USERS\PUBLIC\DOCUMENTS\CHEMSTATION\1\METHODS\def_LC1.M
Last changed   : 12/20/2022 6:41:56 PM by SYSTEM
                                           (modified after loading)
Analysis Method: C:\USERS\PUBLIC\DOCUMENTS\CHEMSTATION\1\METHODS\def_LC1.M
Last changed   : 10/17/2023 10:57:18 AM by SYSTEM
                                           (modified after loading)
Sample Info    : AS-H, Hexane/1-PrOH = 90/10, 0.8 mL/min, 30 oC, 230 nm
  
```

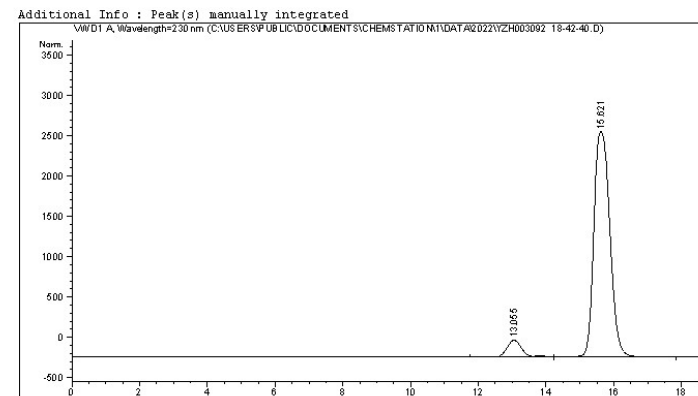

Area Percent Report

```

Sorted By      : Signal
Multiplier    : 1.0000
Dilution      : 1.0000
Do not use Multiplier & Dilution Factor with ISTDs
  
```

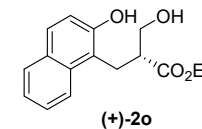

Signal 1: VWD1 A, Wavelength=230 nm

| Peak # | RetTime [min] | Type | Width [min] | Area [mAU*s] | Height [mAU] | Area %  |
|--------|---------------|------|-------------|--------------|--------------|---------|
| 1      | 13.055        | VV R | 0.4646      | 5408.42383   | 172.75548    | 6.6842  |
| 2      | 15.621        | VB   | 0.5206      | 7.55050e4    | 2302.19604   | 93.3158 |

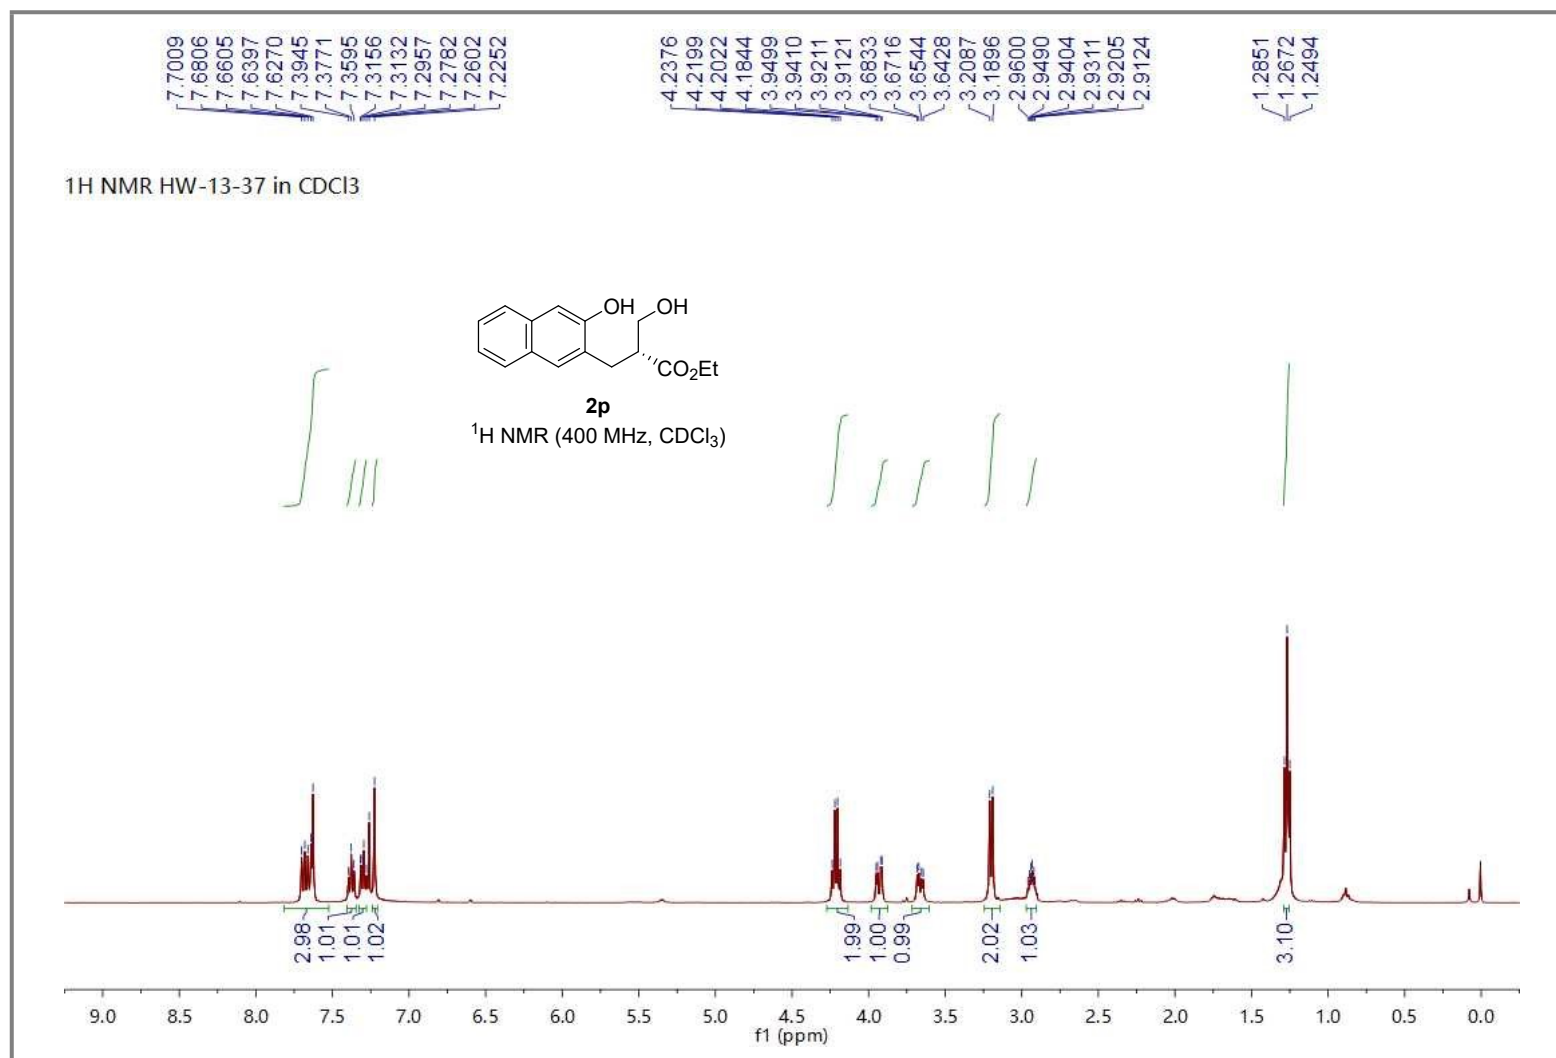

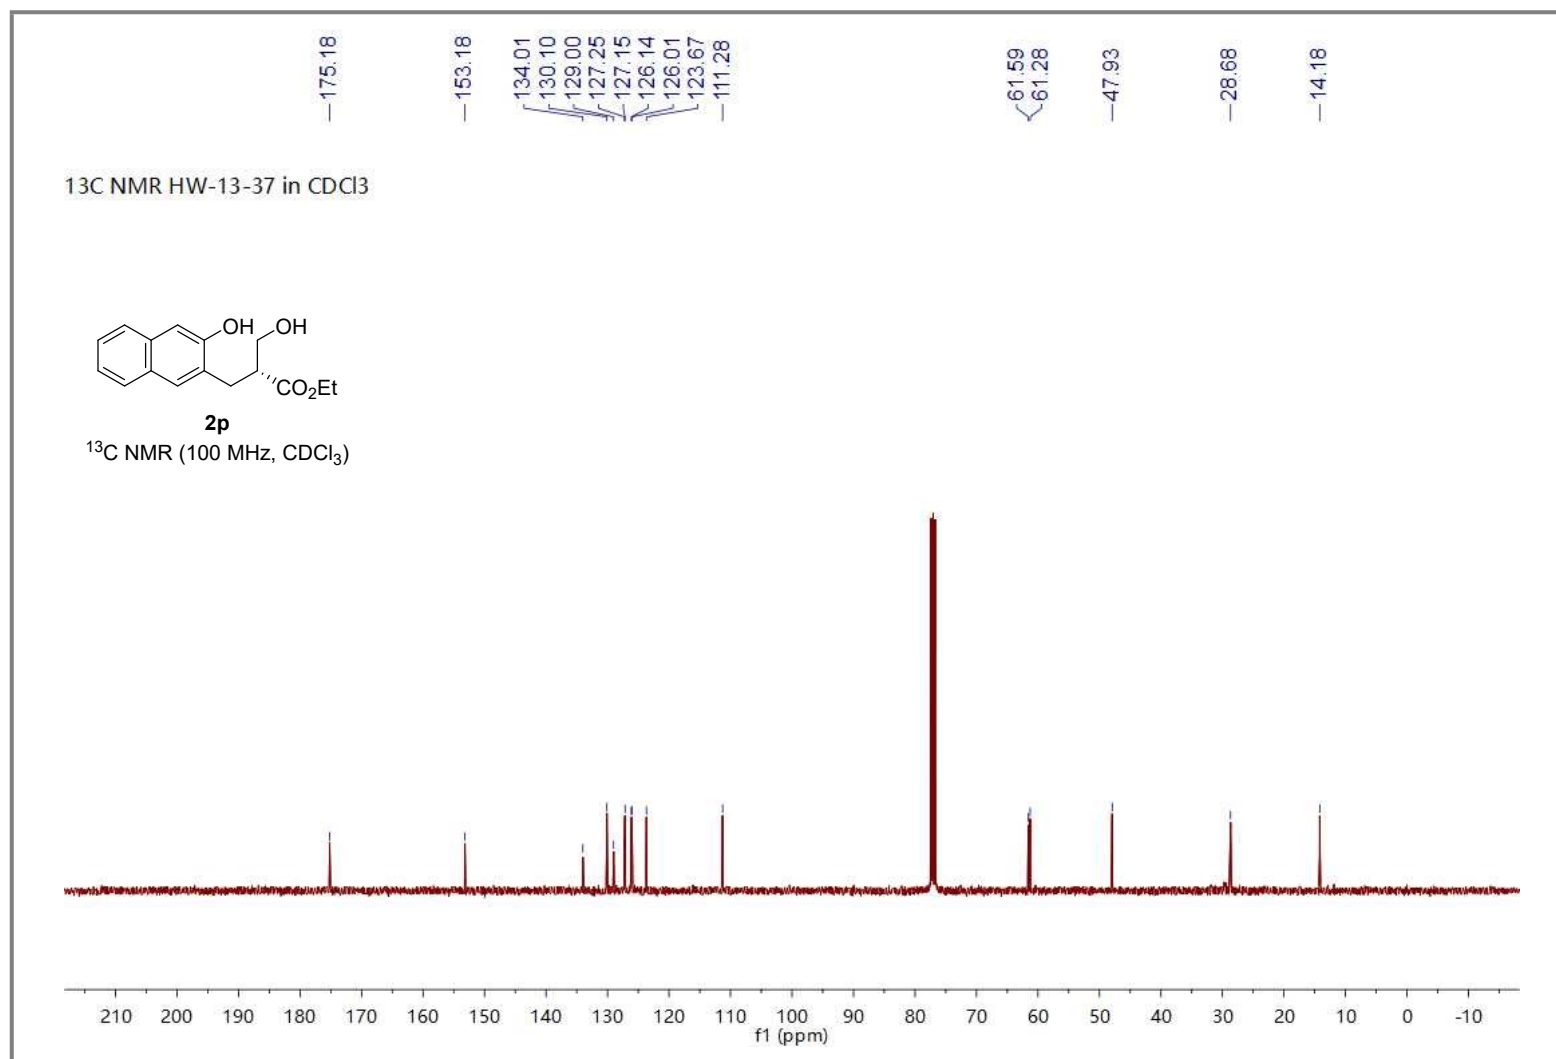

Data File D:\USERS\CHEMSTATION\1\DATA\ZHOU2022\YZ3006114 19-22-43.D  
Sample Name: HW-13-37+/-

=====  
Acq. Operator : SYSTEM  
Sample Operator : SYSTEM  
Acq. Instrument : 1260II Location : -  
Injection Date : 1/9/2023 7:22:43 PM Inj : 1  
Inj Volume : No inj  
Acq. Method : C:\Users\Public\Documents\ChemStation\1\Methods\def\_LC.M  
Last changed : 1/9/2023 7:07:57 PM by SYSTEM  
(modified after loading)  
Analysis Method : C:\Users\Public\Documents\ChemStation\1\Methods\def\_LC.M  
Last changed : 10/17/2023 10:51:55 AM by SYSTEM  
(modified after loading)  
Sample Info : IB, n-Hexane/1-PrOH = 90/10, 0.8 mL/min, 30 oC, 230 nm

Additional Info : Peak(s) manually integrated

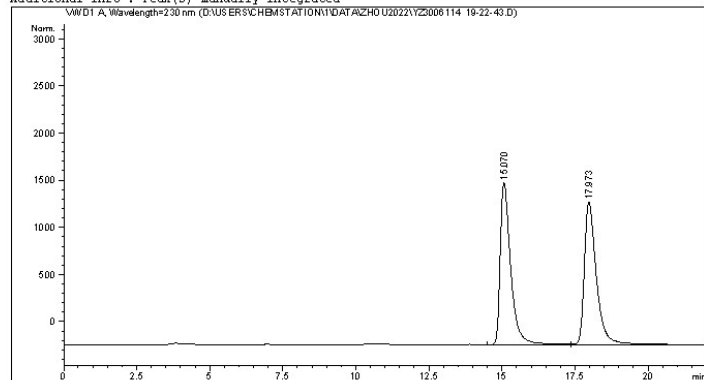

=====  
Area Percent Report  
=====

Sorted By : Signal  
Multiplier : 1.0000  
Dilution : 1.0000  
Do not use Multiplier & Dilution Factor with ISTDs

Signal 1: VWD1 A, Wavelength=230 nm

| Peak # | RetTime [min] | Type | Width [min] | Area [mAU*s] | Height [mAU] | Area %  |
|--------|---------------|------|-------------|--------------|--------------|---------|
| 1      | 15.070        | BV   | 0.3706      | 3.05775e4    | 1231.83613   | 49.7197 |
| 2      | 17.973        | VB   | 0.4277      | 3.09223e4    | 1084.37146   | 50.2803 |

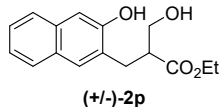

1260II 10/17/2023 10:52:25 AM SYSTEM

Page 1 of 2

Data File D:\USERS\CHEMSTATION\1\DATA\ZHOU2022\YZ3006115 19-47-36.D  
Sample Name: HW-13-37

=====  
Acq. Operator : SYSTEM  
Sample Operator : SYSTEM  
Acq. Instrument : 1260II Location : -  
Injection Date : 1/9/2023 7:47:36 PM Inj : 1  
Inj Volume : No inj  
Acq. Method : C:\Users\Public\Documents\ChemStation\1\Methods\def\_LC.M  
Last changed : 1/9/2023 7:07:57 PM by SYSTEM  
(modified after loading)  
Analysis Method : C:\Users\Public\Documents\ChemStation\1\Methods\def\_LC.M  
Last changed : 10/17/2023 10:51:55 AM by SYSTEM  
(modified after loading)  
Sample Info : IB, n-Hexane/1-PrOH = 90/10, 0.8 mL/min, 30 oC, 230 nm

Additional Info : Peak(s) manually integrated

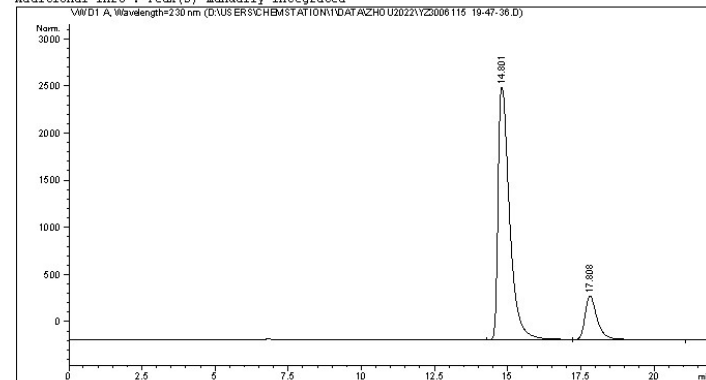

=====  
Area Percent Report  
=====

Sorted By : Signal  
Multiplier : 1.0000  
Dilution : 1.0000  
Do not use Multiplier & Dilution Factor with ISTDs

Signal 1: VWD1 A, Wavelength=230 nm

| Peak # | RetTime [min] | Type | Width [min] | Area [mAU*s] | Height [mAU] | Area %  |
|--------|---------------|------|-------------|--------------|--------------|---------|
| 1      | 14.801        | BV   | 0.4165      | 6.33097e4    | 2297.26587   | 84.3860 |
| 2      | 17.808        | VB   | 0.4372      | 1.17143e4    | 400.56366    | 15.6140 |

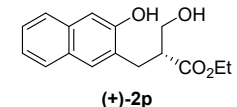

1260II 10/17/2023 10:52:00 AM SYSTEM

Page 1 of 2

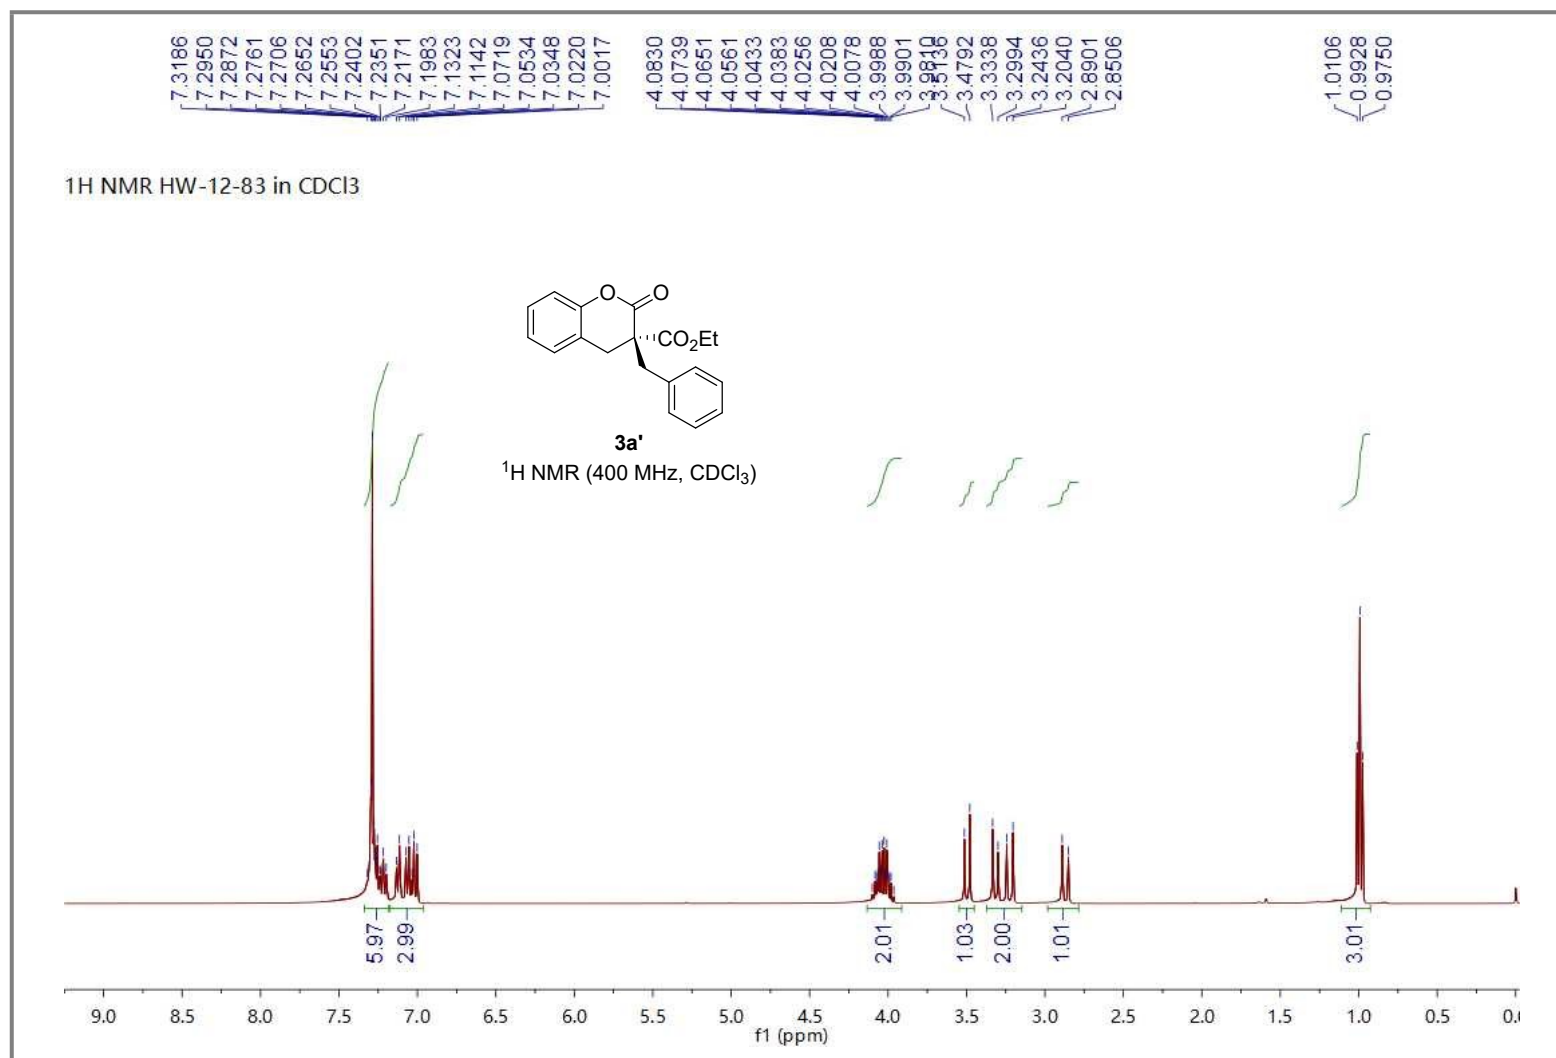



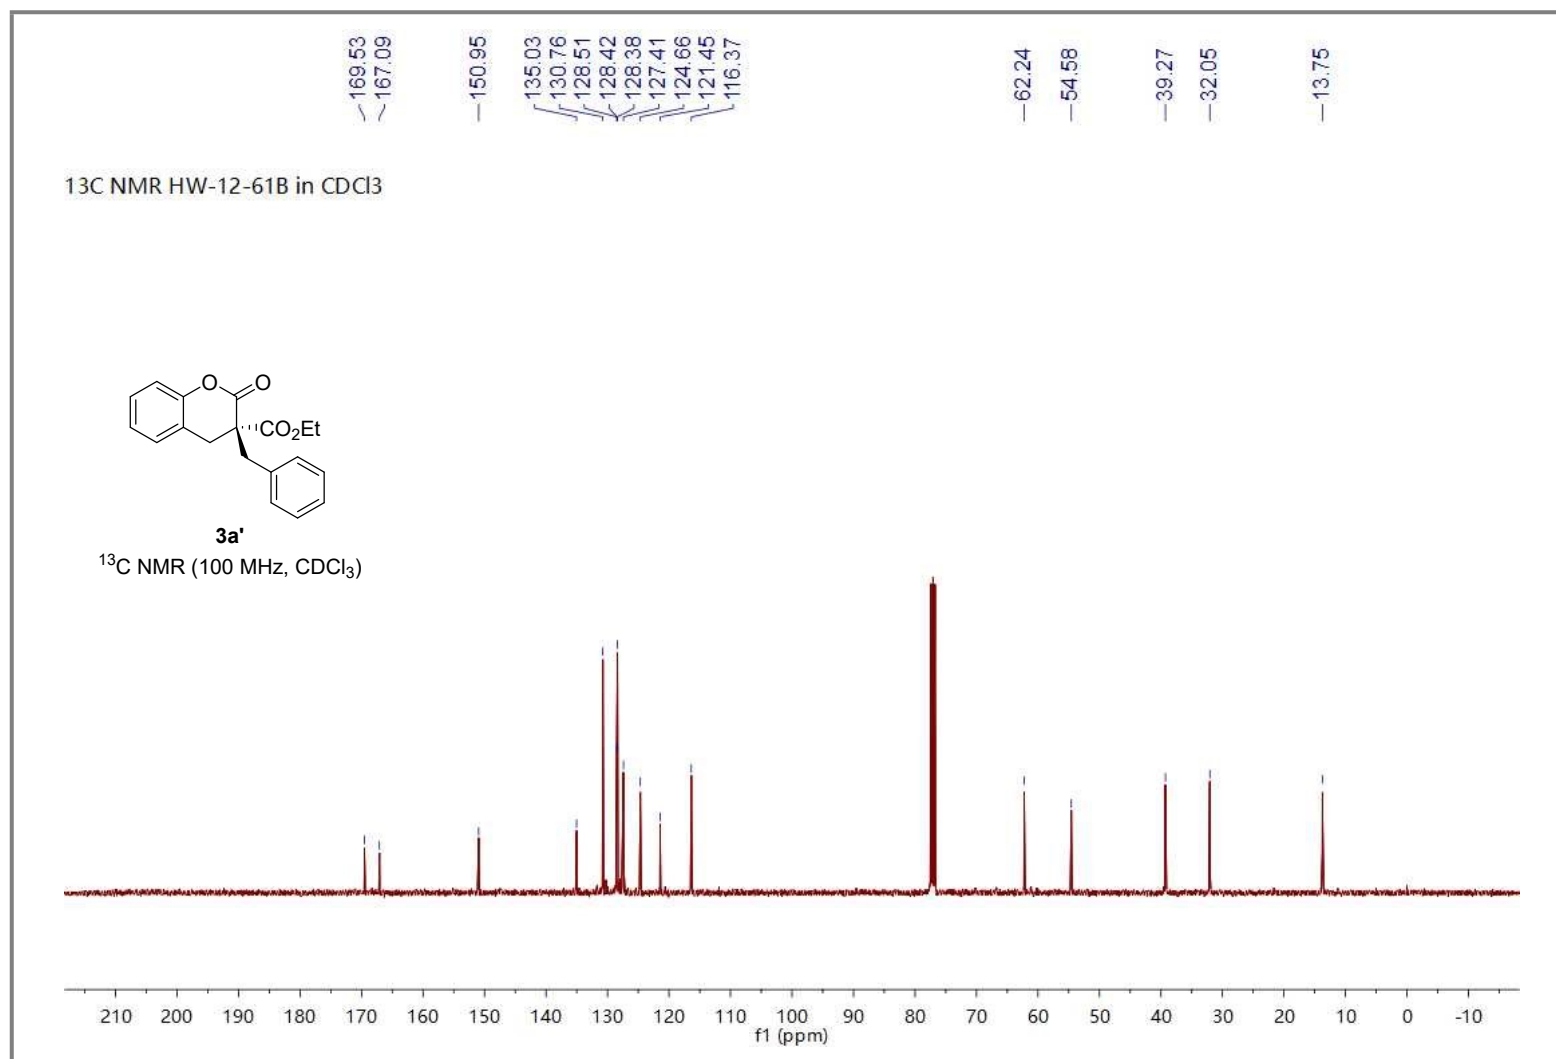

Data File C:\USERS\PUBLIC\DOCUMENTS\CHEMSTATION\1\DATA\2022\YZH002824 14-08-21.D  
 Sample Name: HW-12-64C SM+/-

```

=====
Acq. Operator   : SYSTEM
Sample Operator : SYSTEM
Acq. Instrument : HPLC1260 II           Location : 1
Injection Date  : 11/15/2022 2:08:21 PM Inj       : 1
                                           Inj Volume : No inj
Acq. Method     : C:\USERS\PUBLIC\DOCUMENTS\CHEMSTATION\1\METHODS\def_LC1.M
Last changed    : 11/15/2022 1:49:03 PM by SYSTEM
                 (modified after loading)
Analysis Method : C:\USERS\PUBLIC\DOCUMENTS\CHEMSTATION\1\METHODS\def_LC1.M
Last changed    : 10/16/2023 8:53:54 PM by SYSTEM
                 (modified after loading)
Sample Info     : AS-H, Hexane/i-PrOH = 90/10, 0.8 mL/min, 30 oC, 230 nm
  
```

Additional Info : Peak(s) manually integrated

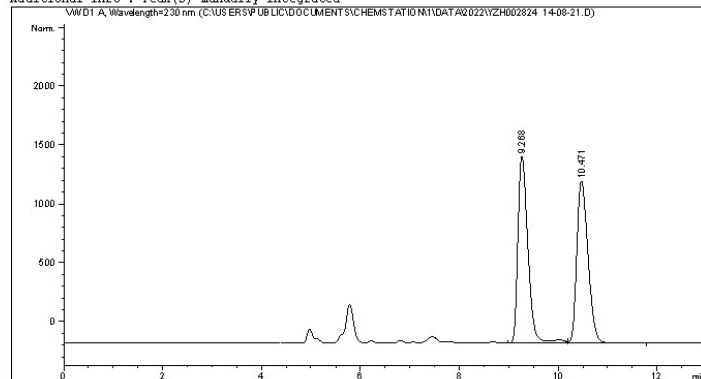

Area Percent Report

```

Sorted By      : Signal
Multiplier     : 1.0000
Dilution       : 1.0000
Do not use Multiplier & Dilution Factor with ISTDs
  
```

Signal 1: VWD1 A, Wavelength=230 nm

| Peak # | RetTime [min] | Type | Width [min] | Area [mAU*s] | Height [mAU] | Area %  |
|--------|---------------|------|-------------|--------------|--------------|---------|
| 1      | 9.268         | BV R | 0.2125      | 1.71476e4    | 1216.52478   | 50.7952 |
| 2      | 10.471        | VB   | 0.2456      | 1.66107e4    | 1055.36694   | 49.2048 |

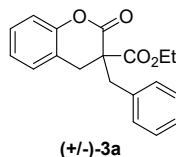

Data File C:\CHEM32\1\DATA\ZHOU-22\YZN022696.D  
 Sample Name: HW-14-8A SM'

```

=====
Acq. Operator   :
Acq. Instrument : Instrument 1         Location : -
Injection Date   : 3/22/2023 8:46:31 AM
Acq. Method      : C:\CHEM32\1\METHODS\DEF_LC.M
Last changed     : 3/22/2023 8:34:55 AM
                 (modified after loading)
Analysis Method  : C:\CHEM32\1\METHODS\DEF_LC.M
Last changed     : 10/18/2023 4:00:41 AM
                 (modified after loading)
Sample Info      : AS-H, Hexane/i-PrOH = 90/10, 0.8 mL/min, 30 oC, 230 nm
  
```

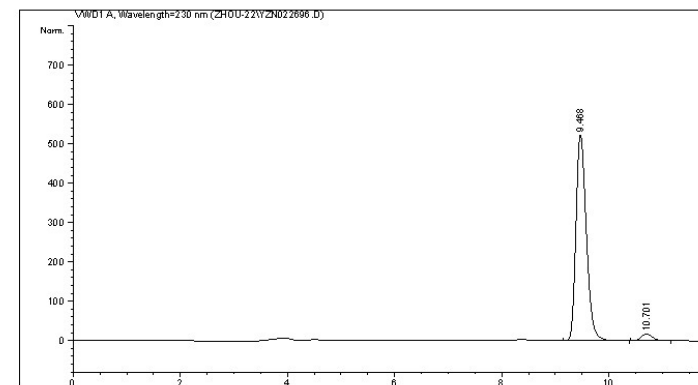

Area Percent Report

```

Sorted By      : Signal
Multiplier     : 1.0000
Dilution       : 1.0000
Use Multiplier & Dilution Factor with ISTDs
  
```

Signal 1: VWD1 A, Wavelength=230 nm

| Peak # | RetTime [min] | Type | Width [min] | Area [mAU*s] | Height [mAU] | Area %  |
|--------|---------------|------|-------------|--------------|--------------|---------|
| 1      | 9.468         | VB   | 0.2098      | 7061.64648   | 523.32916    | 96.4830 |
| 2      | 10.701        | BB   | 0.2273      | 257.40836    | 17.46237     | 3.5170  |

Totals : 7319.05484 540.79154

\*\*\* End of Report \*\*\*

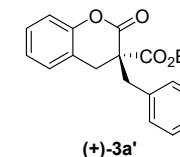

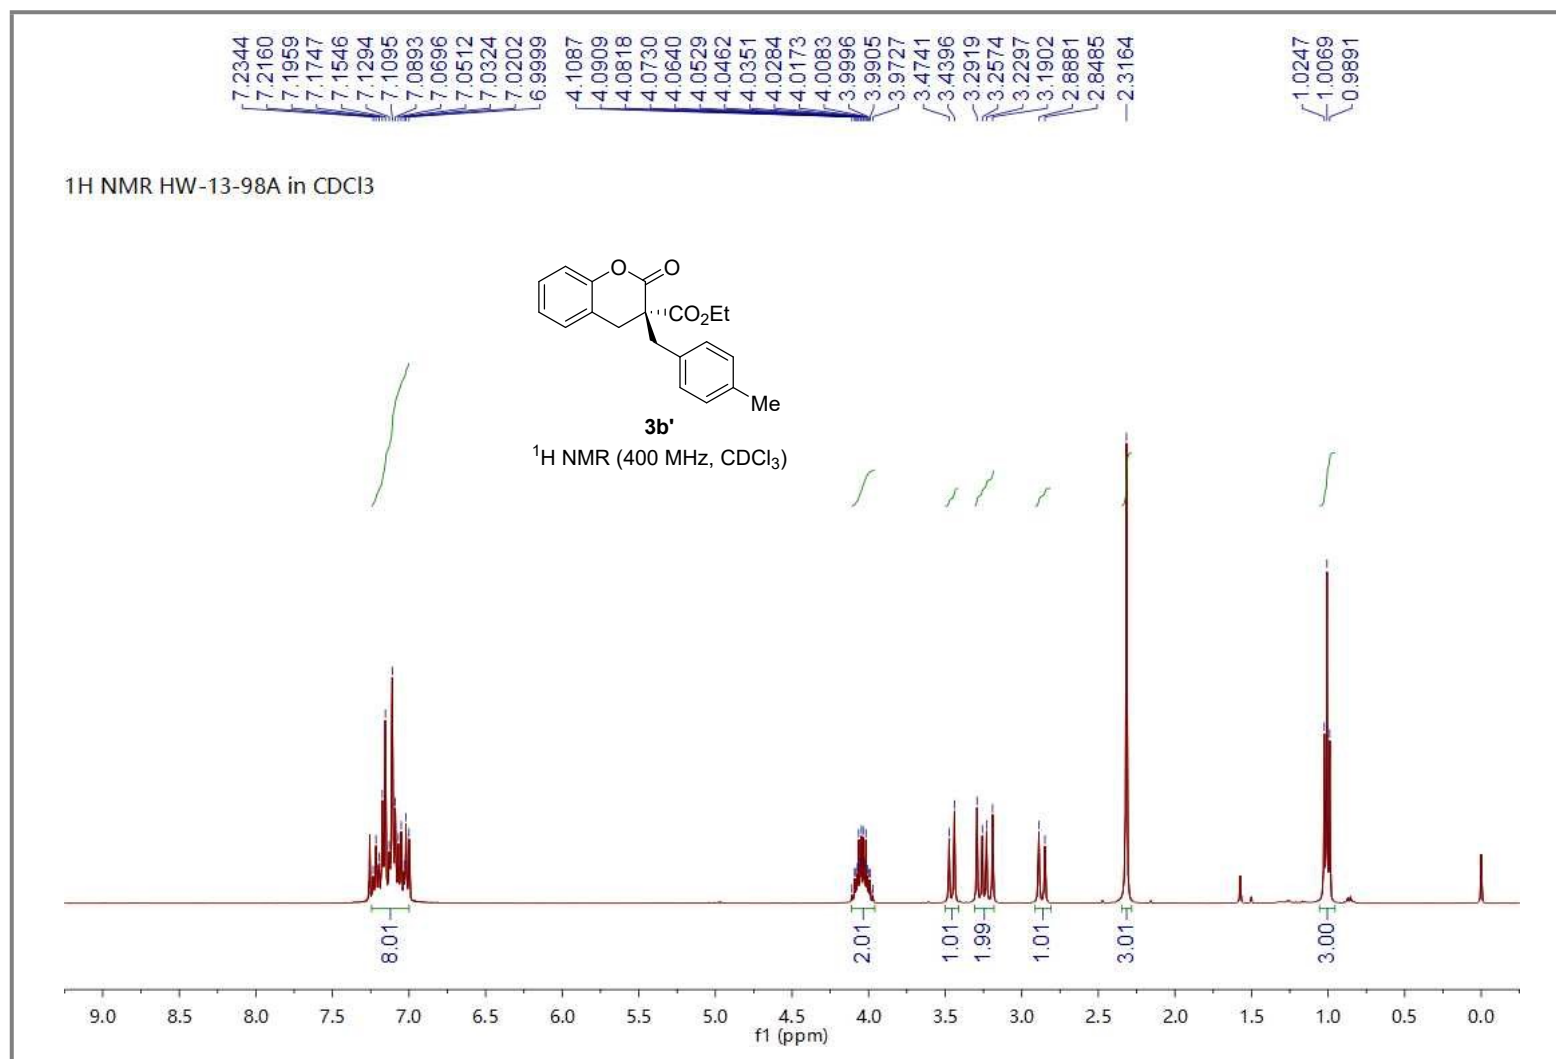

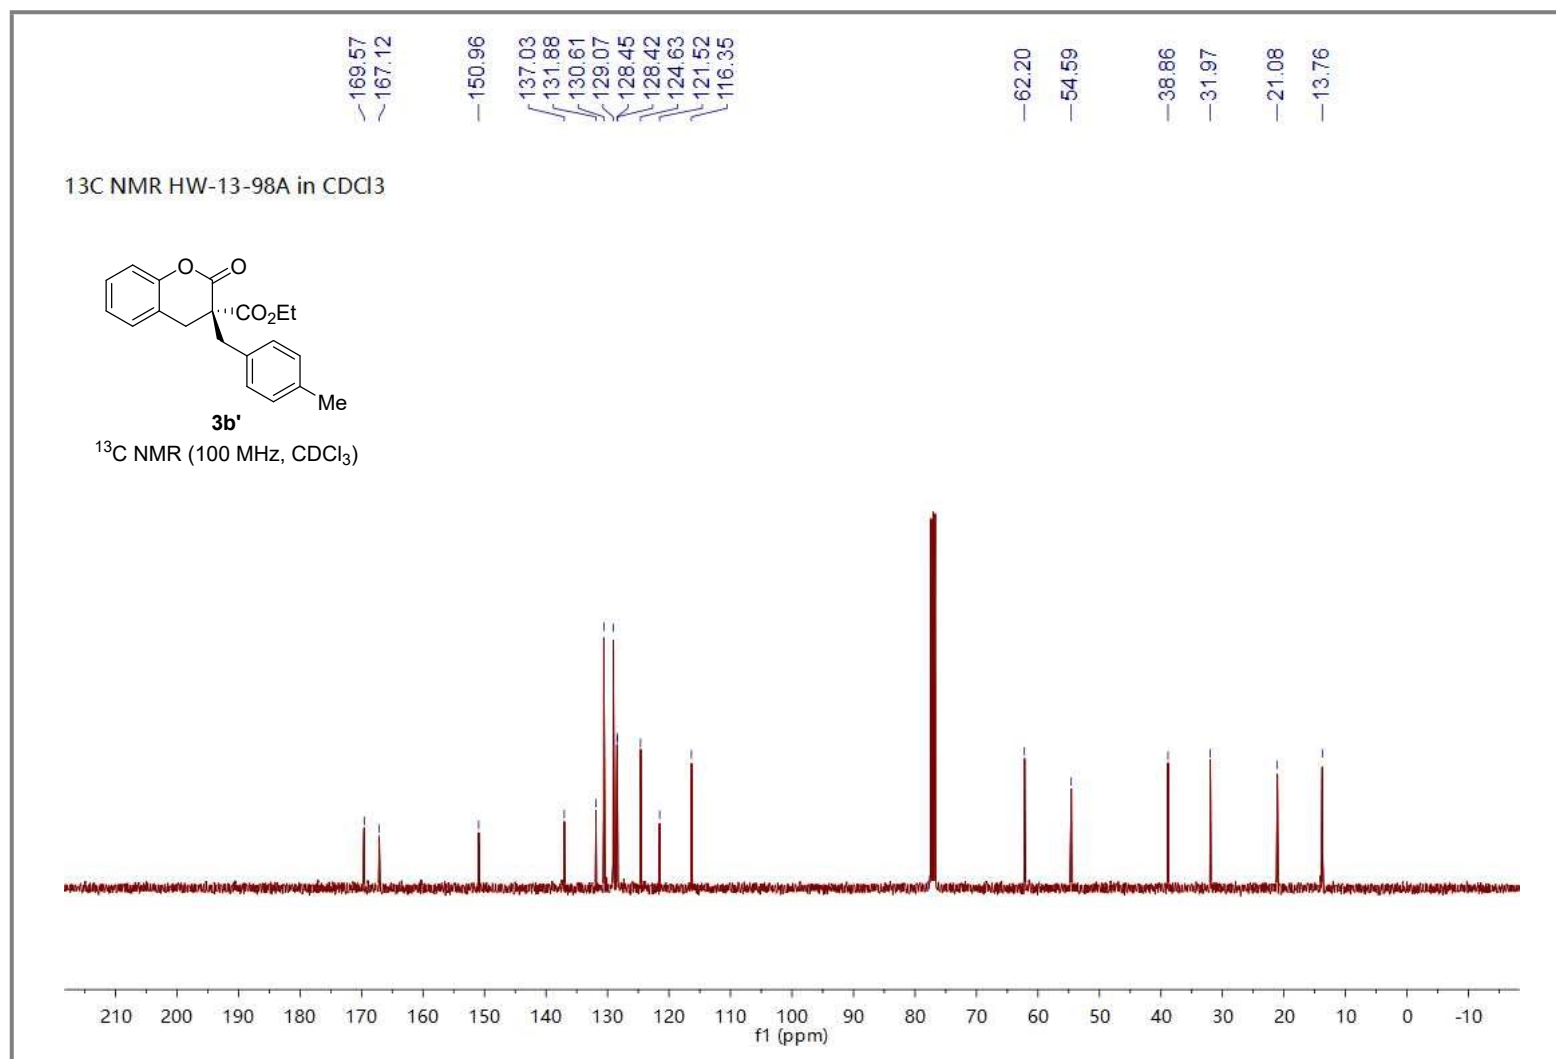

Data File C:\CHEM32\1\DATA\ZHOU-22\YZN022666.D  
Sample Name: HW-13-98A+/-

=====  
Acq. Operator :  
Acq. Instrument : Instrument 1 Location : -  
Injection Date : 3/18/2023 4:50:21 AM  
Acq. Method : C:\CHEM32\1\METHODS\DEF\_LC.M  
Last changed : 3/18/2023 4:49:11 AM  
(modified after loading)  
Analysis Method : C:\CHEM32\1\METHODS\DEF\_LC.M  
Last changed : 10/17/2023 8:47:42 AM  
Sample Info : AS-H, Hexane/i-PrOH = 90/10, 0.8 mL/min, 30 oC, 230nm

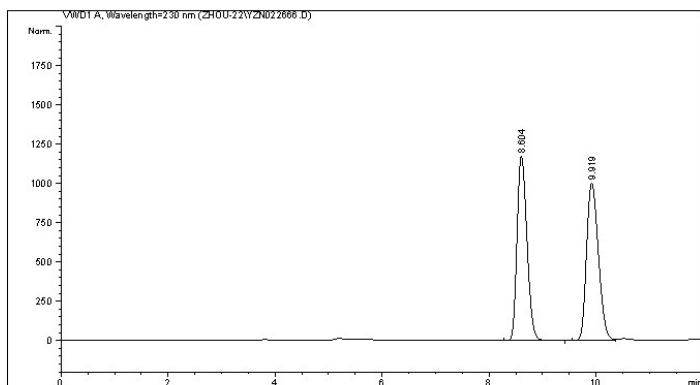

=====  
Area Percent Report  
=====

Sorted By : Signal  
Multiplier: : 1.0000  
Dilution: : 1.0000  
Use Multiplier & Dilution Factor with ISTDs

Signal 1: VWD1 A, Wavelength=230 nm

| Peak # | RetTime [min] | Type | Width [min] | Area [mAU] | Height [mAU] | Area %  |
|--------|---------------|------|-------------|------------|--------------|---------|
| 1      | 8.604         | BB   | 0.2026      | 1.51038e4  | 1173.28320   | 49.4957 |
| 2      | 9.919         | BV   | 0.2419      | 1.54116e4  | 1002.69934   | 50.5043 |

Totals : 3.05154e4 2175.98254

=====  
\*\*\* End of Report \*\*\*

Instrument 1 10/17/2023 8:47:46 AM

Page 1 of 1

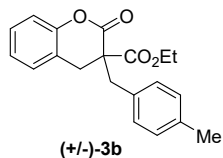

Data File C:\CHEM32\1\DATA\ZHOU-22\YZN022697.D  
Sample Name: HW-14-8B 5M'

=====  
Acq. Operator :  
Acq. Instrument : Instrument 1 Location : -  
Injection Date : 3/22/2023 9:09:22 AM  
Acq. Method : C:\CHEM32\1\METHODS\DEF\_LC.M  
Last changed : 3/22/2023 9:06:42 AM  
(modified after loading)  
Analysis Method : C:\CHEM32\1\METHODS\DEF\_LC.M  
Last changed : 10/17/2023 8:49:46 AM  
Sample Info : AS-H, Hexane/i-PrOH = 90/10, 0.8 mL/min, 30 oC, 230 nm

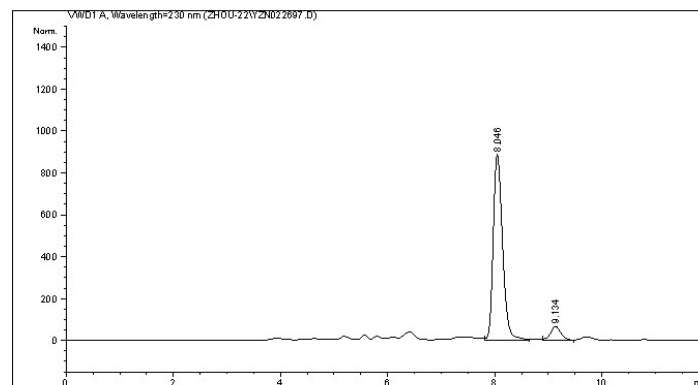

=====  
Area Percent Report  
=====

Sorted By : Signal  
Multiplier: : 1.0000  
Dilution: : 1.0000  
Use Multiplier & Dilution Factor with ISTDs

Signal 1: VWD1 A, Wavelength=230 nm

| Peak # | RetTime [min] | Type | Width [min] | Area [mAU] | Height [mAU] | Area %  |
|--------|---------------|------|-------------|------------|--------------|---------|
| 1      | 8.046         | VV   | 0.1888      | 1.08113e4  | 886.86145    | 92.0598 |
| 2      | 9.134         | VV   | 0.2106      | 932.47943  | 66.90748     | 7.9402  |

Totals : 1.17438e4 953.76893

=====  
\*\*\* End of Report \*\*\*

Instrument 1 10/17/2023 8:49:50 AM

Page 1 of 1

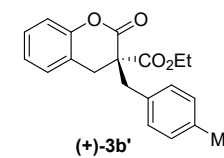

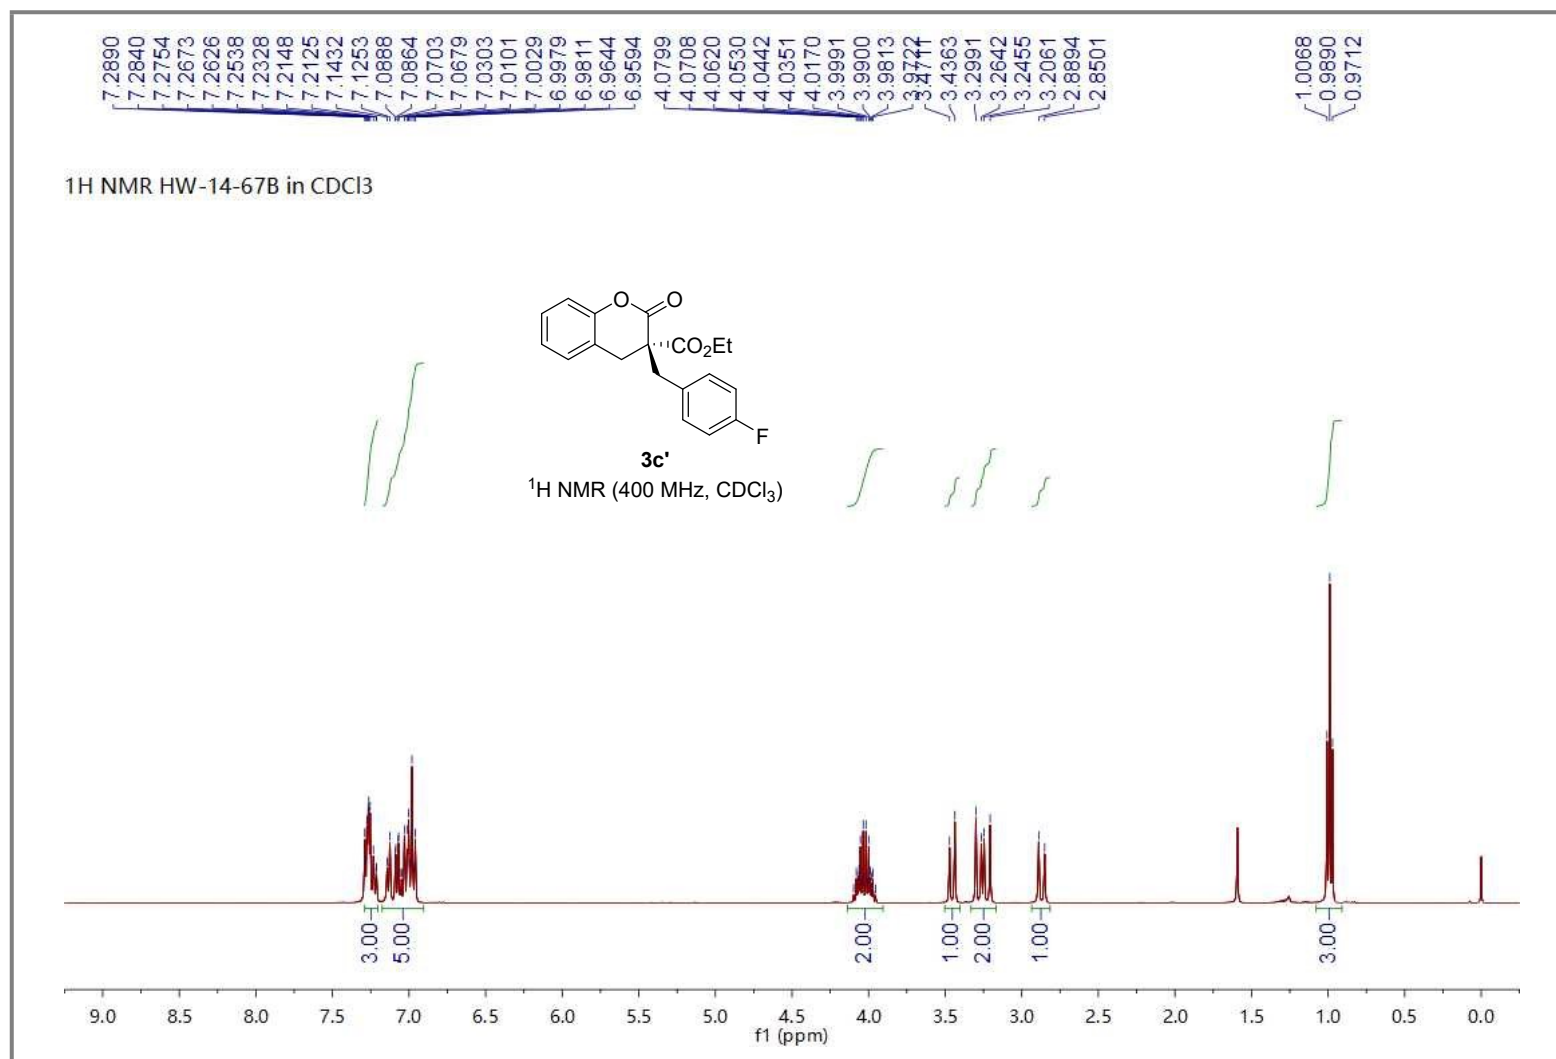

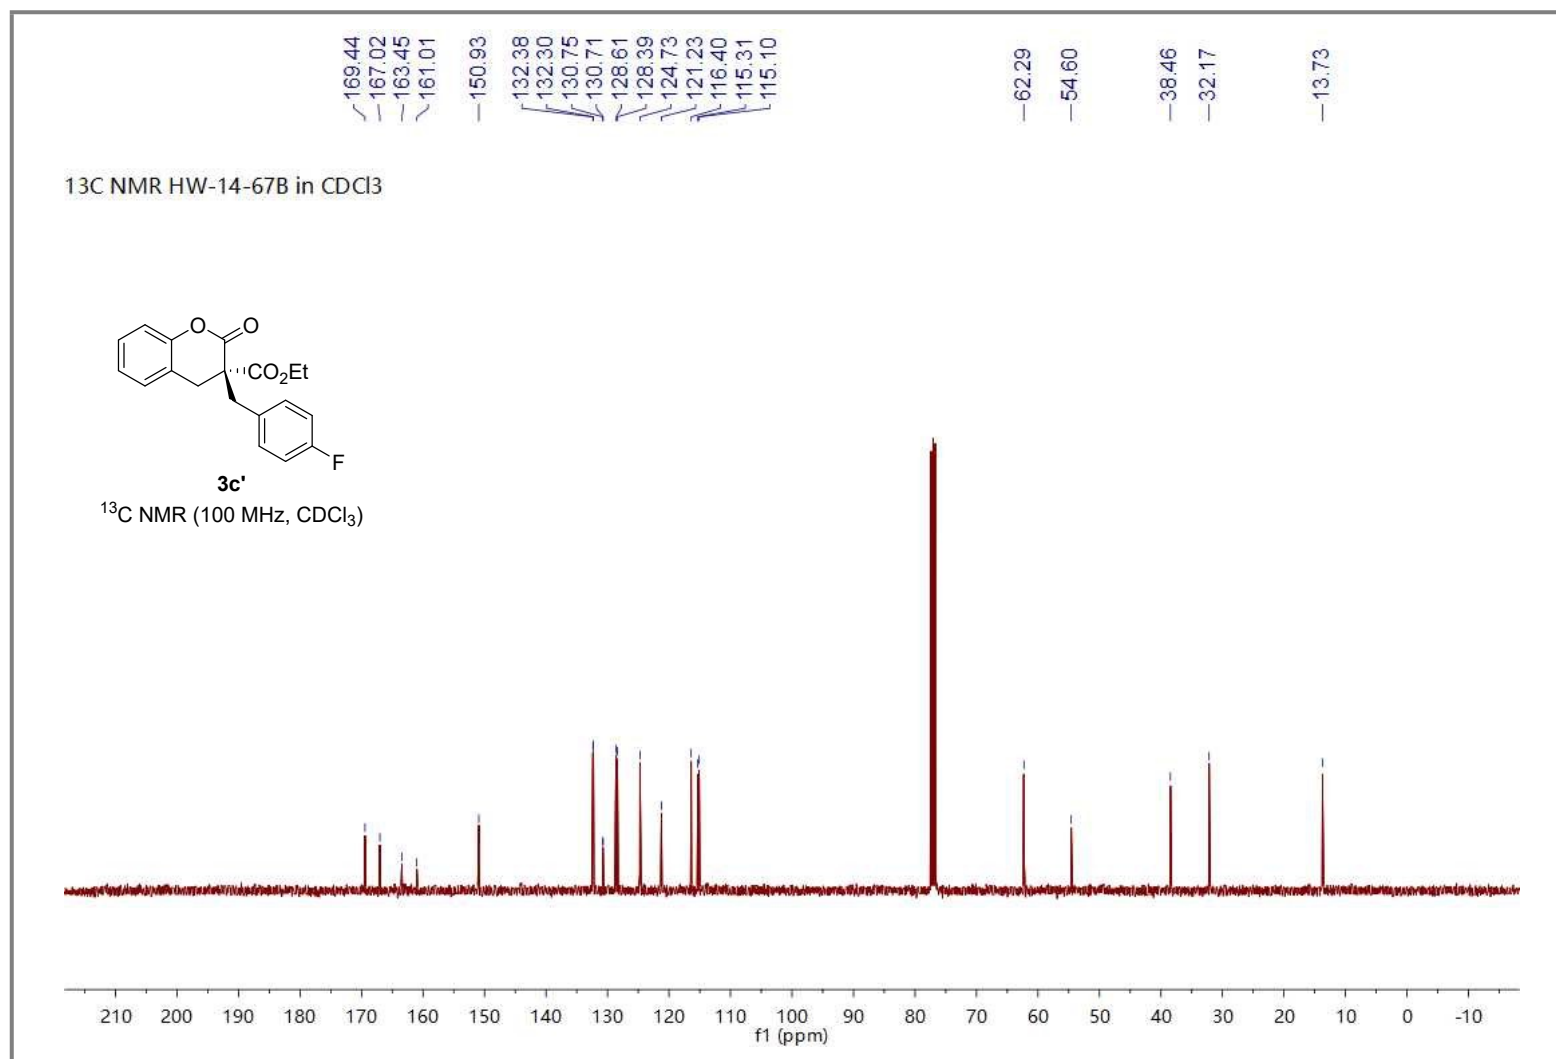

<sup>19</sup>F NMR HW-14-67B in CDCl<sub>3</sub>

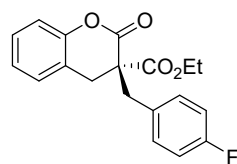

**3c'**  
<sup>19</sup>F NMR (376 MHz, CDCl<sub>3</sub>)

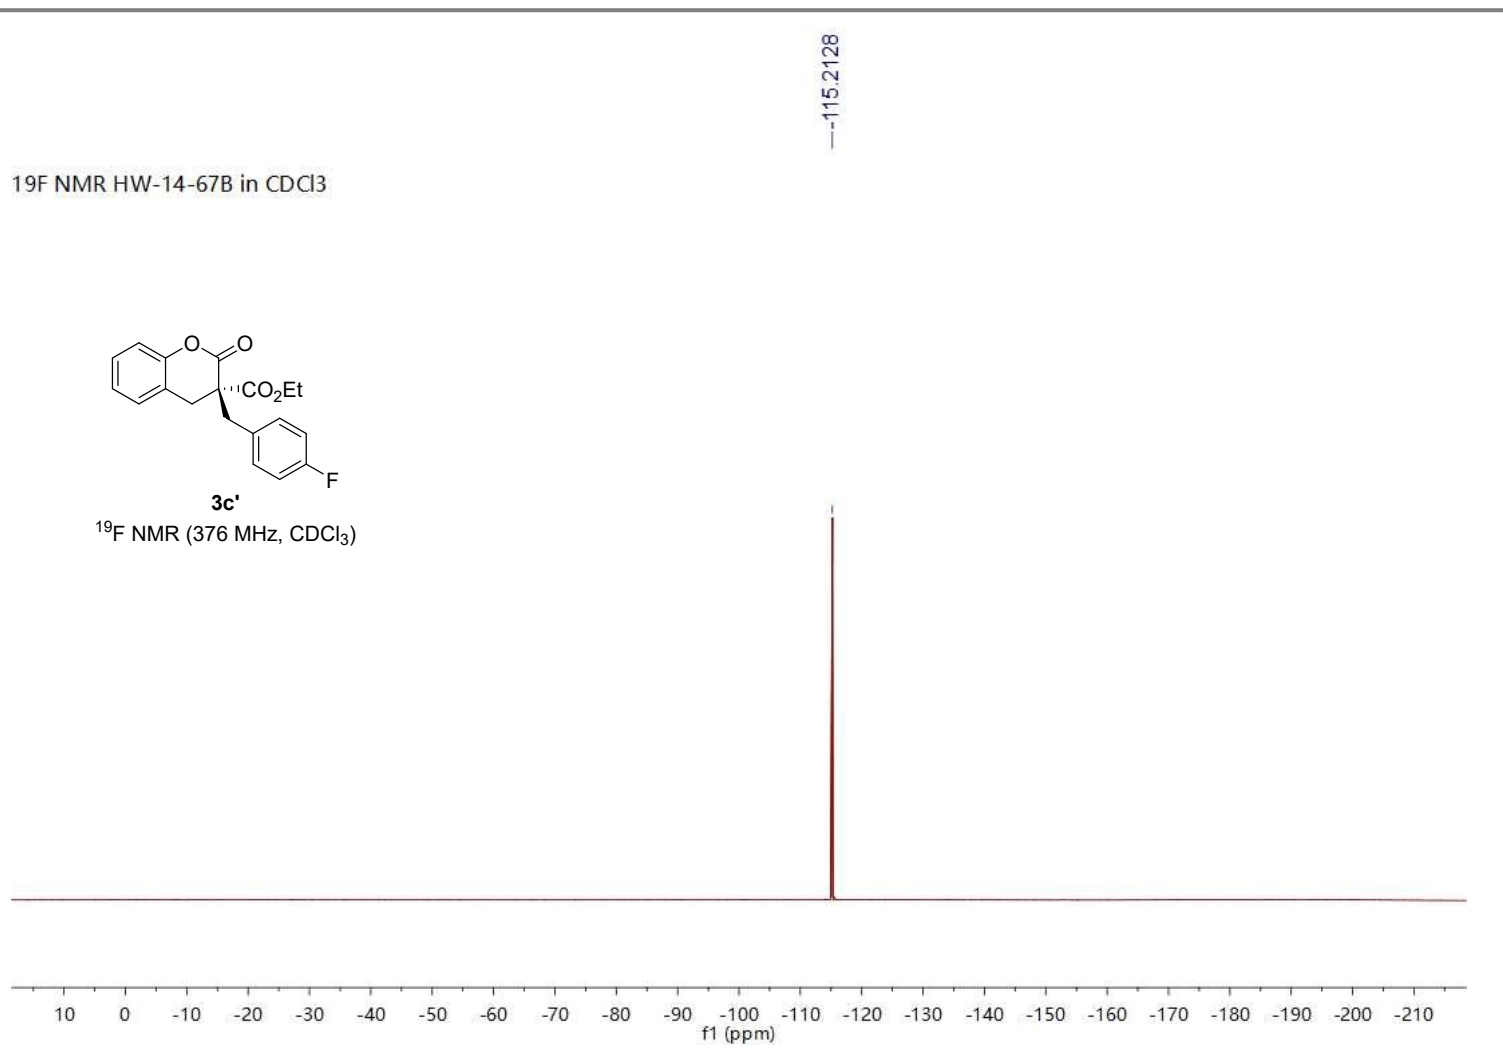



Data File C:\CHEM32\1\DATA\ZHOU-22\YZH005562 17-30-03.D  
 Sample Name: HW-14-67B+/-

=====  
 Acq. Operator : SYSTEM  
 Acq. Instrument : HPLC1260 II Location : Vial 1  
 Injection Date : 11/28/2023 5:30:03 PM Inj Volume : No inj  
 Acq. Method : C:\USERS\PUBLIC\DOCUMENTS\CHEMSTATION\1\METHODS\def\_LC1.M  
 Last changed : 11/28/2023 5:27:19 PM by SYSTEM  
 (modified after loading)  
 Analysis Method : C:\CHEM32\1\METHODS\DEF\_LC.M  
 Last changed : 11/30/2023 8:58:34 AM  
 (modified after loading)

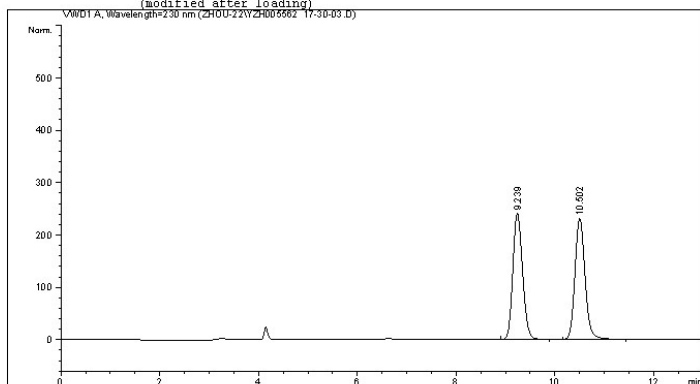

=====  
 Area Percent Report  
 =====

Sorted By : Signal  
 Multiplier: : 1.0000  
 Dilution: : 1.0000  
 Use Multiplier & Dilution Factor with ISTDs

Signal 1: VWD1 A, Wavelength=230 nm

| Peak # | RetTime [min] | Type | Width [min] | Area [mAU*s] | Height [mAU] | Area %  |
|--------|---------------|------|-------------|--------------|--------------|---------|
| 1      | 9.239         | BB   | 0.2119      | 3275.86230   | 240.48276    | 50.0812 |
| 2      | 10.502        | BB   | 0.2191      | 3265.23950   | 230.76292    | 49.9188 |

Totals : 6541.10181 471.24568

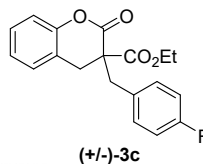

=====  
 \*\*\* End of Report \*\*\*

Instrument 1 11/30/2023 8:58:44 AM

Page 1 of 1

Data File C:\CHEM32\1\DATA\ZHOU-23\YZN023214.D  
 Sample Name: HW-14-73B SM

=====  
 Acq. Operator :  
 Acq. Instrument : Instrument 1 Location : -  
 Injection Date : 5/30/2023 4:58:20 AM  
 Acq. Method : C:\CHEM32\1\METHODS\DEF\_LC.M  
 Last changed : 5/30/2023 4:57:54 AM  
 (modified after loading)  
 Analysis Method : C:\CHEM32\1\METHODS\DEF\_LC.M  
 Last changed : 10/17/2023 8:58:36 AM  
 (modified after loading)  
 Sample Info : AS-H, Hexane/i-PrOH = 90/10, 0.8 mL/min, 30 oC, 230 nm

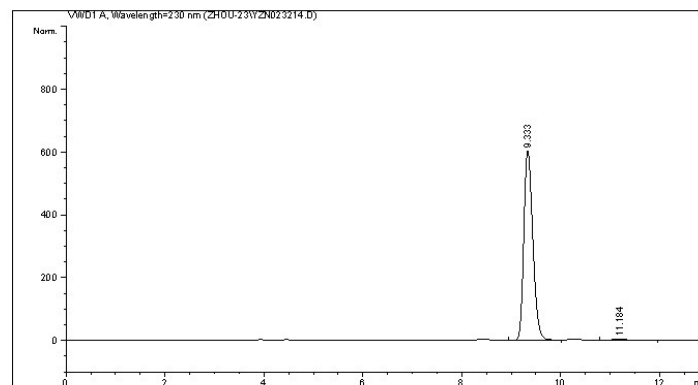

=====  
 Area Percent Report  
 =====

Sorted By : Signal  
 Multiplier: : 1.0000  
 Dilution: : 1.0000  
 Use Multiplier & Dilution Factor with ISTDs

Signal 1: VWD1 A, Wavelength=230 nm

| Peak # | RetTime [min] | Type | Width [min] | Area [mAU*s] | Height [mAU] | Area %  |
|--------|---------------|------|-------------|--------------|--------------|---------|
| 1      | 9.333         | EV   | 0.1972      | 7633.78906   | 603.07947    | 99.1347 |
| 2      | 11.184        | WB   | 0.3151      | 66.63427     | 3.07884      | 0.8653  |

Totals : 7700.42333 606.15831

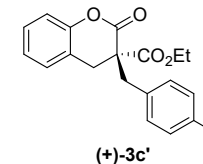

=====  
 \*\*\* End of Report \*\*\*

Instrument 1 10/17/2023 8:58:36 AM

Page 1 of 1

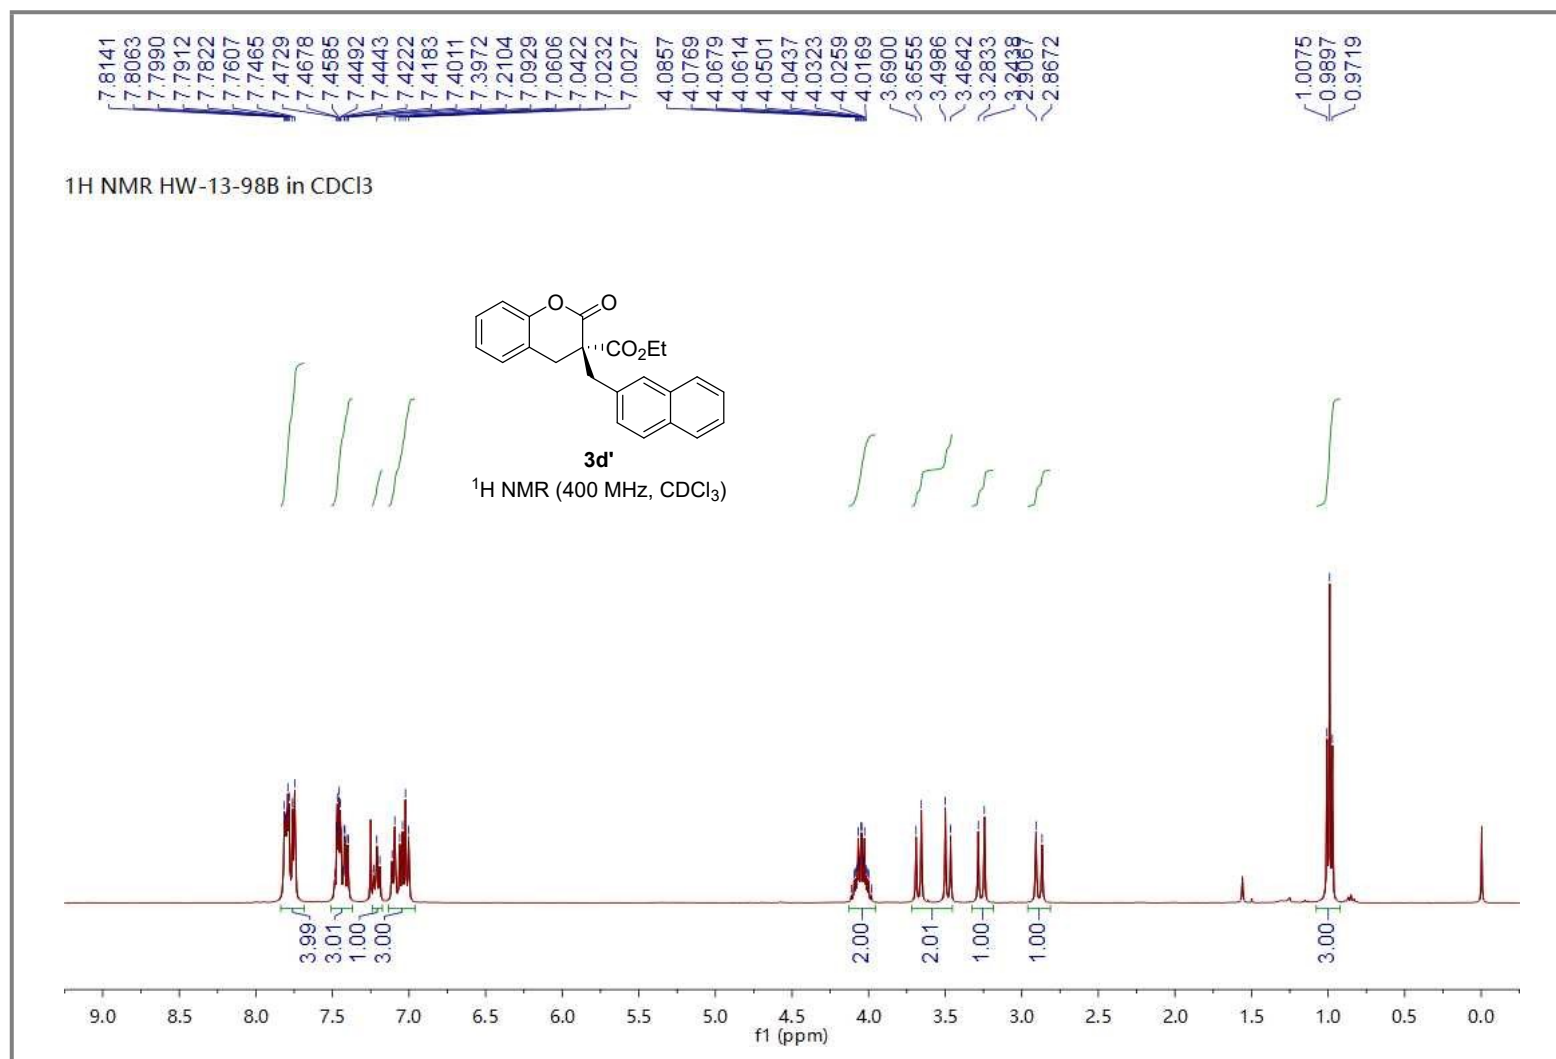

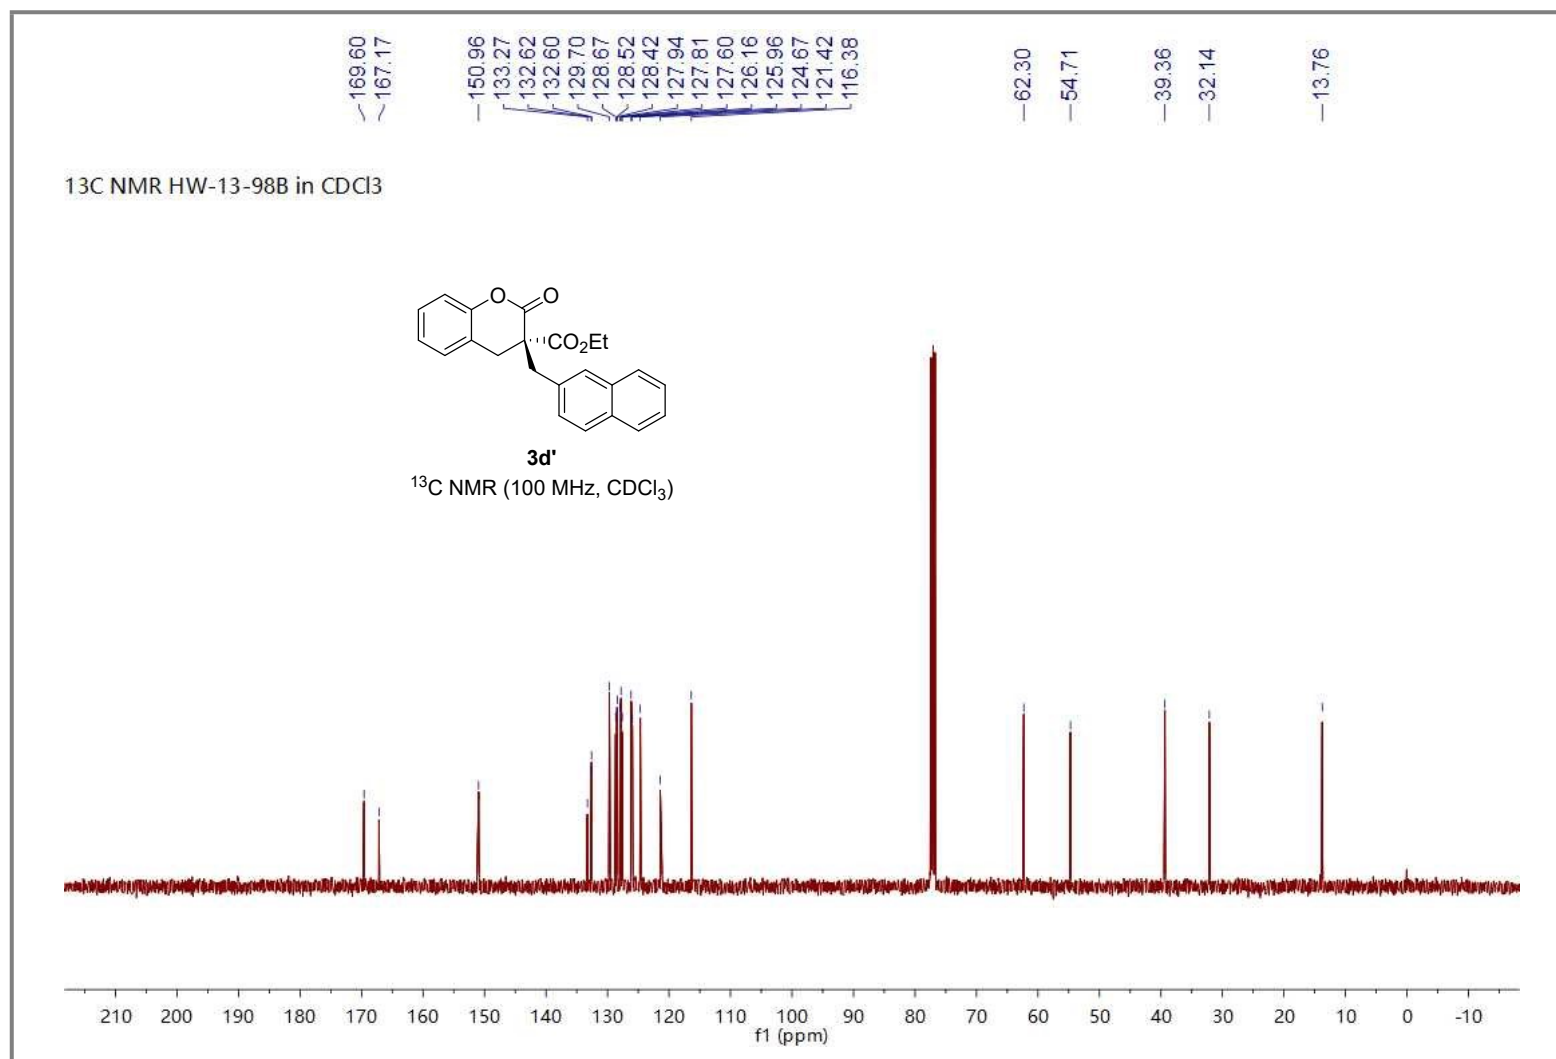

Data File C:\CHEM32\1\DATA\ZHOU-23\ZH005556 15-34-07.D  
 Sample Name: HW-13-98B +/-

=====  
 Acq. Operator : SYSTEM  
 Acq. Instrument : HPLC1260 II Location : Vial 1  
 Injection Date : 11/28/2023 3:34:08 PM Inj Volume : No inj  
 Acq. Method : C:\USERS\PUBLIC\DOCUMENTS\CHEMSTATION\1\METHODS\def\_LC1.M  
 Last changed : 11/28/2023 3:17:25 PM by SYSTEM  
 (modified after loading)  
 Analysis Method : C:\CHEM32\1\METHODS\DEF\_LC.M  
 Last changed : 11/30/2023 8:07:56 AM  
 (modified after loading)

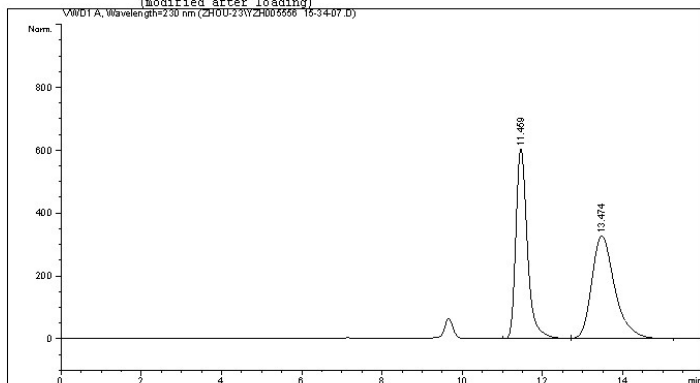

=====  
 Area Percent Report  
 =====  
 Sorted By : Signal  
 Multiplier: : 1.0000  
 Dilution: : 1.0000  
 Use Multiplier & Dilution Factor with ISTDs

Signal 1: VWD1 A, Wavelength=230 nm

| Peak #   | RetTime [min] | Type | Width [min] | Area [mAU*s] | Height [mAU] | Area %  |
|----------|---------------|------|-------------|--------------|--------------|---------|
| 1        | 11.459        | BV   | 0.3069      | 1.20354e4    | 602.91223    | 48.0585 |
| 2        | 13.474        | VB   | 0.6067      | 1.30079e4    | 327.30435    | 51.9415 |
| Totals : |               |      |             | 2.50433e4    | 930.21658    |         |

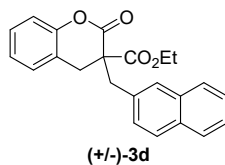

Instrument 1 11/30/2023 8:08:17 AM

Page 1 of 1

Data File C:\USERS\PUBLIC\DOCUMENTS\CHEMSTATION\1\DATA\2023\ZH004326 14-10-08.D  
 Sample Name: HW-14-76SM

=====  
 Acq. Operator : SYSTEM  
 Sample Operator : SYSTEM  
 Acq. Instrument : HPLC1260 II Location : 1  
 Injection Date : 6/5/2023 2:10:08 PM Inj : 1  
 Inj Volume : No inj  
 Acq. Method : C:\USERS\PUBLIC\DOCUMENTS\CHEMSTATION\1\METHODS\def\_LC1.M  
 Last changed : 6/5/2023 1:48:31 PM by SYSTEM  
 (modified after loading)  
 Analysis Method : C:\USERS\PUBLIC\DOCUMENTS\CHEMSTATION\1\METHODS\def\_LC1.M  
 Last changed : 11/29/2023 9:29:35 PM by SYSTEM  
 (modified after loading)  
 Sample Info : AS-H, Hexane/1-PrOH = 90/10, 0.8 mL/min, 30 oC, 230 nm

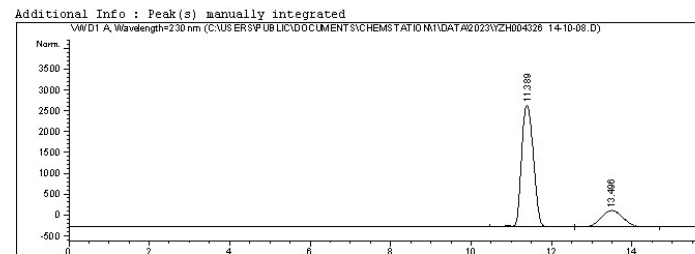

=====  
 Area Percent Report  
 =====  
 Sorted By : Signal  
 Multiplier : 1.0000  
 Dilution : 1.0000  
 Sample Amount: : 1.00000 [ng/ul] (not used in calc.)  
 Do not use Multiplier & Dilution Factor with ISTDs

Signal 1: VWD1 A, Wavelength=230 nm

| Peak #   | RetTime [min] | Type | Width [min] | Area [mAU*s] | Height [mAU] | Area %  |
|----------|---------------|------|-------------|--------------|--------------|---------|
| 1        | 11.389        | VV R | 0.3307      | 4.77353e4    | 2337.02051   | 79.8645 |
| 2        | 13.496        | BB   | 0.5983      | 1.20351e4    | 316.75845    | 20.1355 |
| Totals : |               |      |             | 5.97704e4    | 2653.77896   |         |

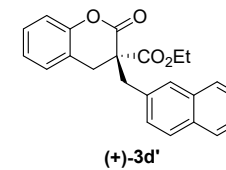

HPLC1260 II 11/29/2023 9:29:43 PM SYSTEM

Page 1 of 1

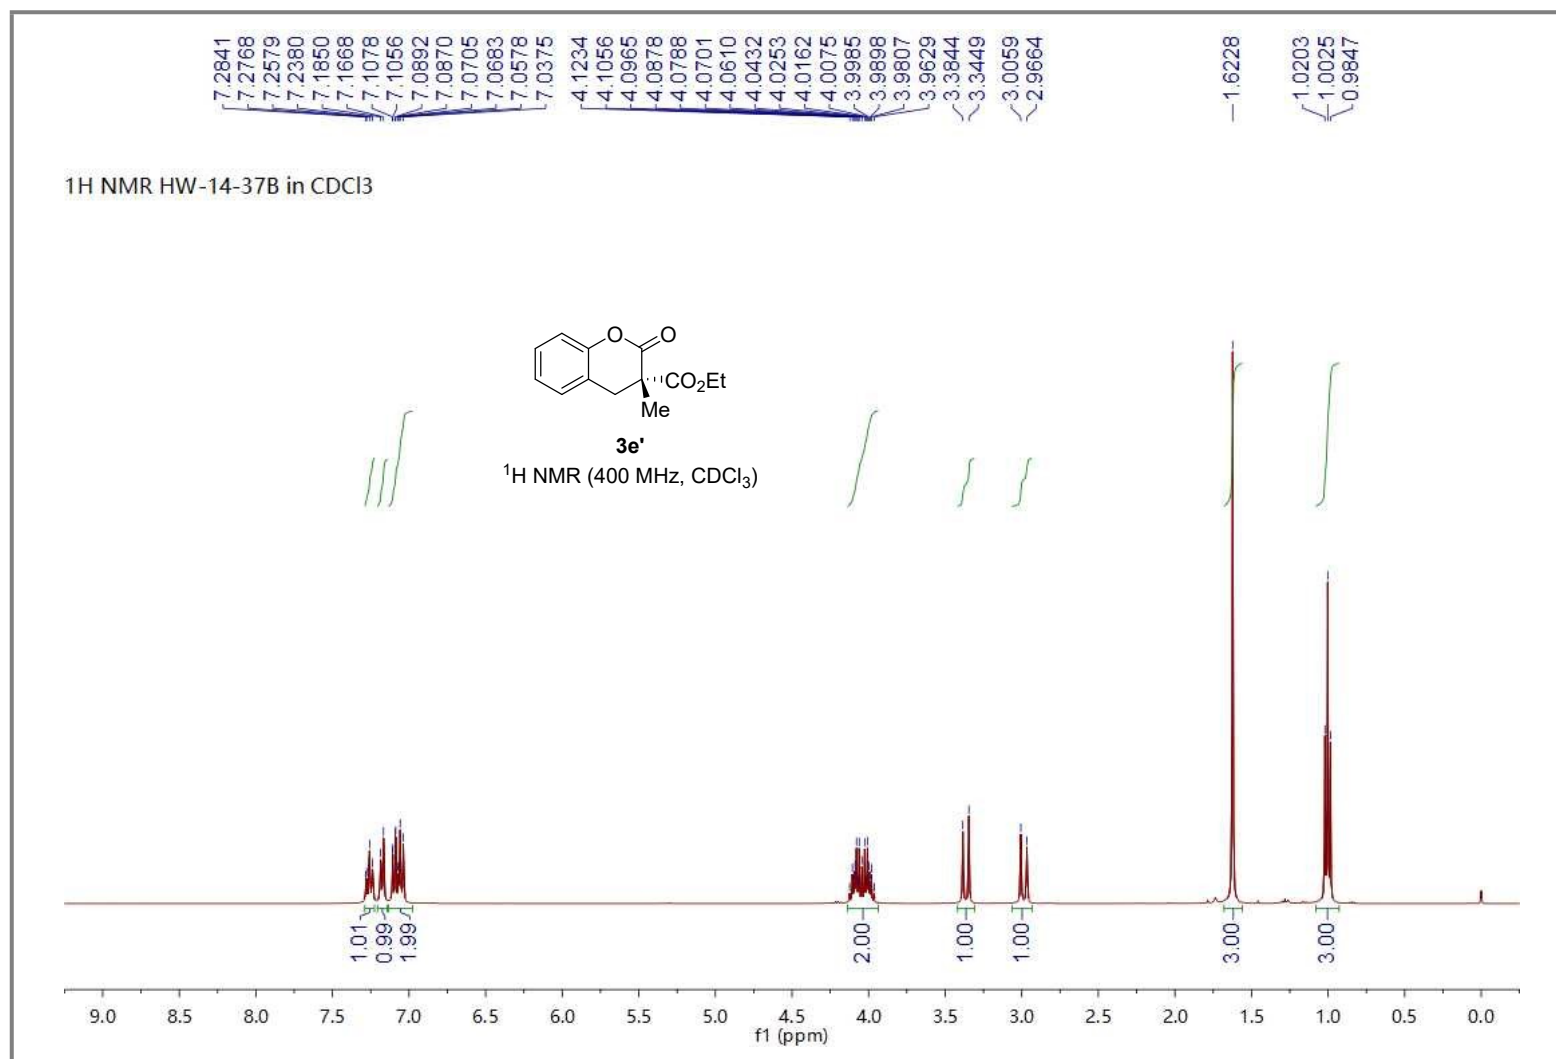

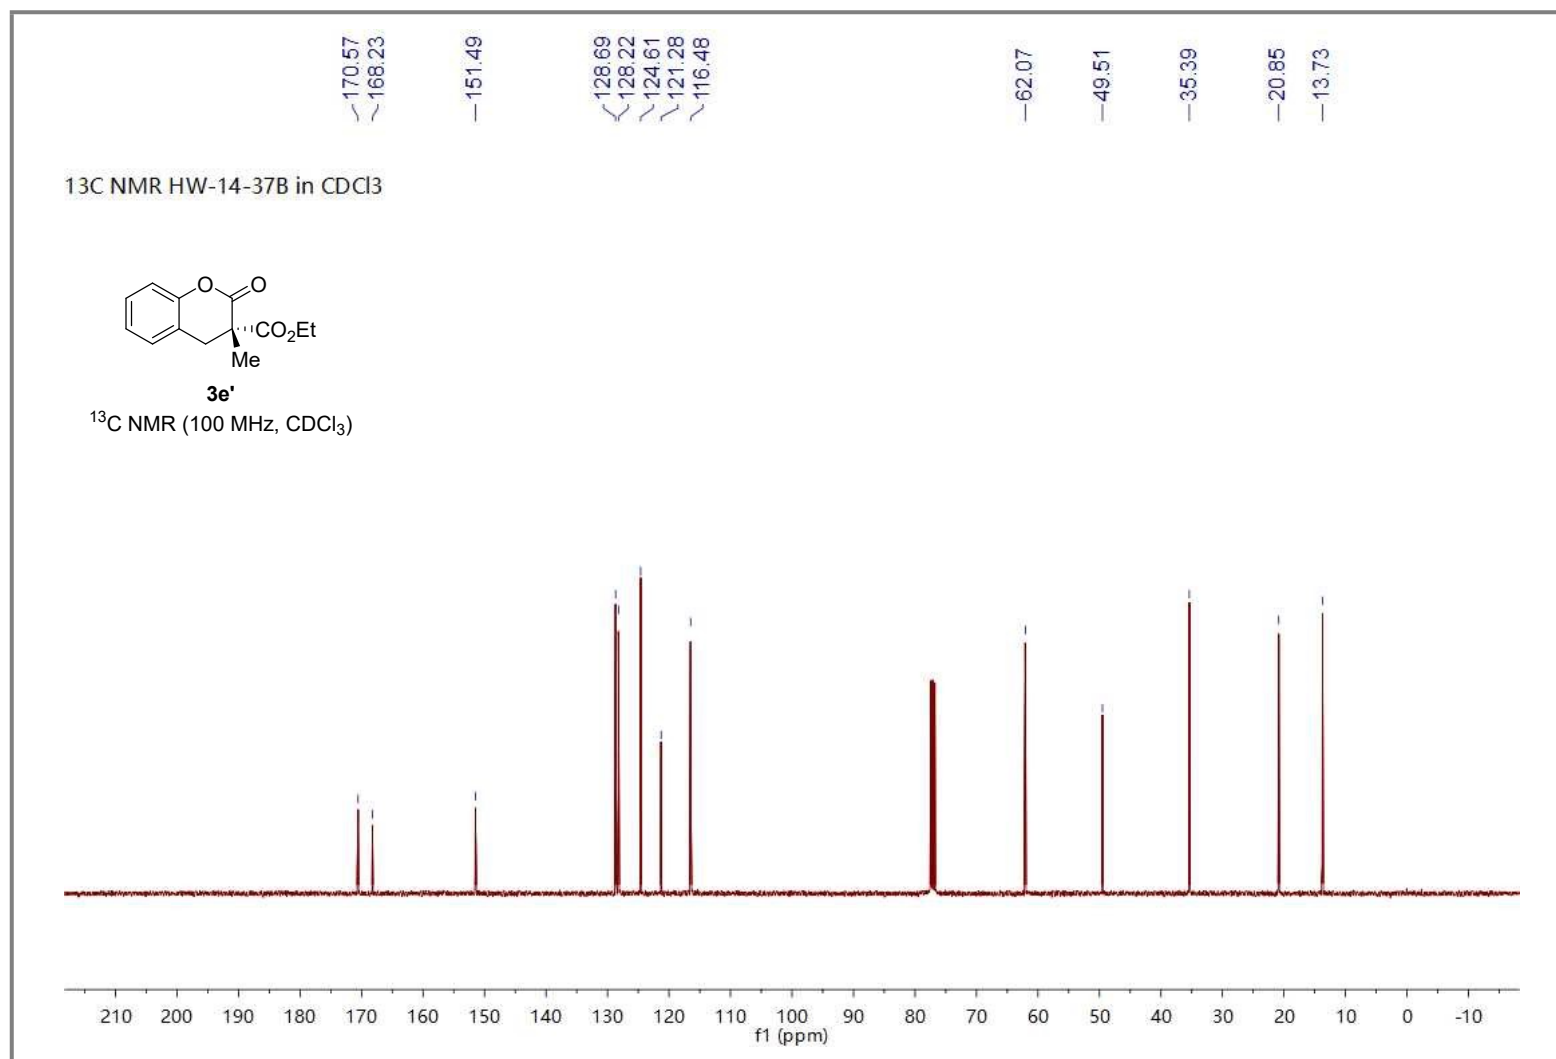

Data File C:\CHEM32\1\DATA\ZHOU-23\YZN022942.D  
 Sample Name: HW-14-41B SM+/-

=====  
 Acq. Operator :  
 Acq. Instrument : Instrument 1 Location : -  
 Injection Date : 4/22/2023 9:08:35 AM  
 Acq. Method : C:\CHEM32\1\METHODS\DEF\_LC.M  
 Last changed : 4/22/2023 9:08:11 AM  
 (modified after loading)  
 Analysis Method : C:\CHEM32\1\METHODS\DEF\_LC.M  
 Last changed : 10/17/2023 9:15:12 AM  
 (modified after loading)  
 Sample Info : AS-H, Hexane/i-PrOH = 90/10, 0.8mL/min, 30 oC, 230 nm

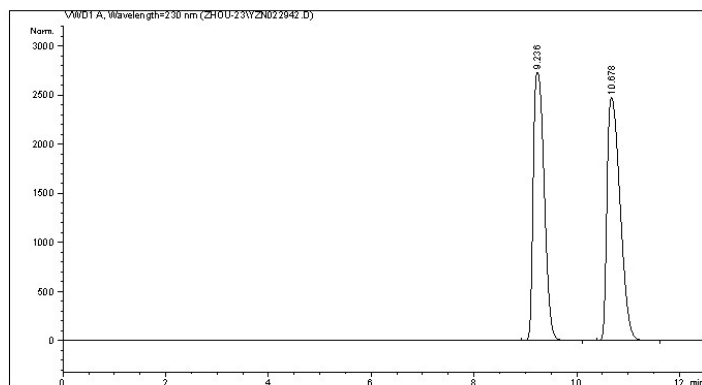

=====  
 Area Percent Report  
 =====

Sorted By : Signal  
 Multiplier: : 1.0000  
 Dilution: : 1.0000  
 Use Multiplier & Dilution Factor with ISTDs

Signal 1: VWD1 A, Wavelength=230 nm

| Peak # | RetTime [min] | Type | Width [min] | Area [mAU*s] | Height [mAU] | Area %  |
|--------|---------------|------|-------------|--------------|--------------|---------|
| 1      | 9.236         | BB   | 0.2377      | 4.03326e4    | 2733.45776   | 48.1167 |
| 2      | 10.678        | BB   | 0.2808      | 4.34900e4    | 2474.20898   | 51.8833 |

Totals : 8.38226e4 5207.66675

=====  
 \*\*\* End of Report \*\*\*

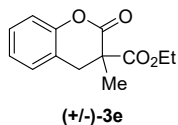

Data File C:\CHEM32\1\DATA\ZHOU-23\YZN022973.D  
 Sample Name: HW-14-41B SM'

=====  
 Acq. Operator :  
 Acq. Instrument : Instrument 1 Location : -  
 Injection Date : 4/26/2023 3:50:09 AM  
 Acq. Method : C:\CHEM32\1\METHODS\DEF\_LC.M  
 Last changed : 4/26/2023 3:46:00 AM  
 (modified after loading)  
 Analysis Method : C:\CHEM32\1\METHODS\DEF\_LC.M  
 Last changed : 10/17/2023 9:16:21 AM  
 (modified after loading)  
 Sample Info : AS-H, Hexane/i-PrOH = 90/10, 0.8 mL/min, 30 oC, 230 nm

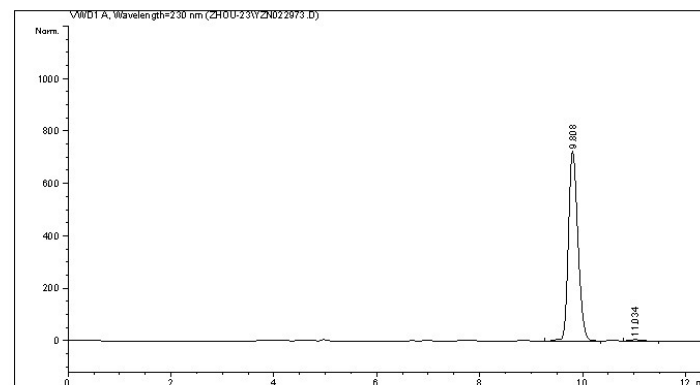

=====  
 Area Percent Report  
 =====

Sorted By : Signal  
 Multiplier: : 1.0000  
 Dilution: : 1.0000  
 Use Multiplier & Dilution Factor with ISTDs

Signal 1: VWD1 A, Wavelength=230 nm

| Peak # | RetTime [min] | Type | Width [min] | Area [mAU*s] | Height [mAU] | Area %  |
|--------|---------------|------|-------------|--------------|--------------|---------|
| 1      | 9.808         | EV   | 0.1985      | 9239.00488   | 723.36456    | 99.1812 |
| 2      | 11.034        | VB   | 0.2306      | 76.27379     | 5.07842      | 0.8188  |

Totals : 9315.27867 728.44298

=====  
 \*\*\* End of Report \*\*\*

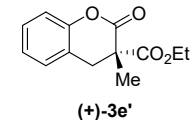

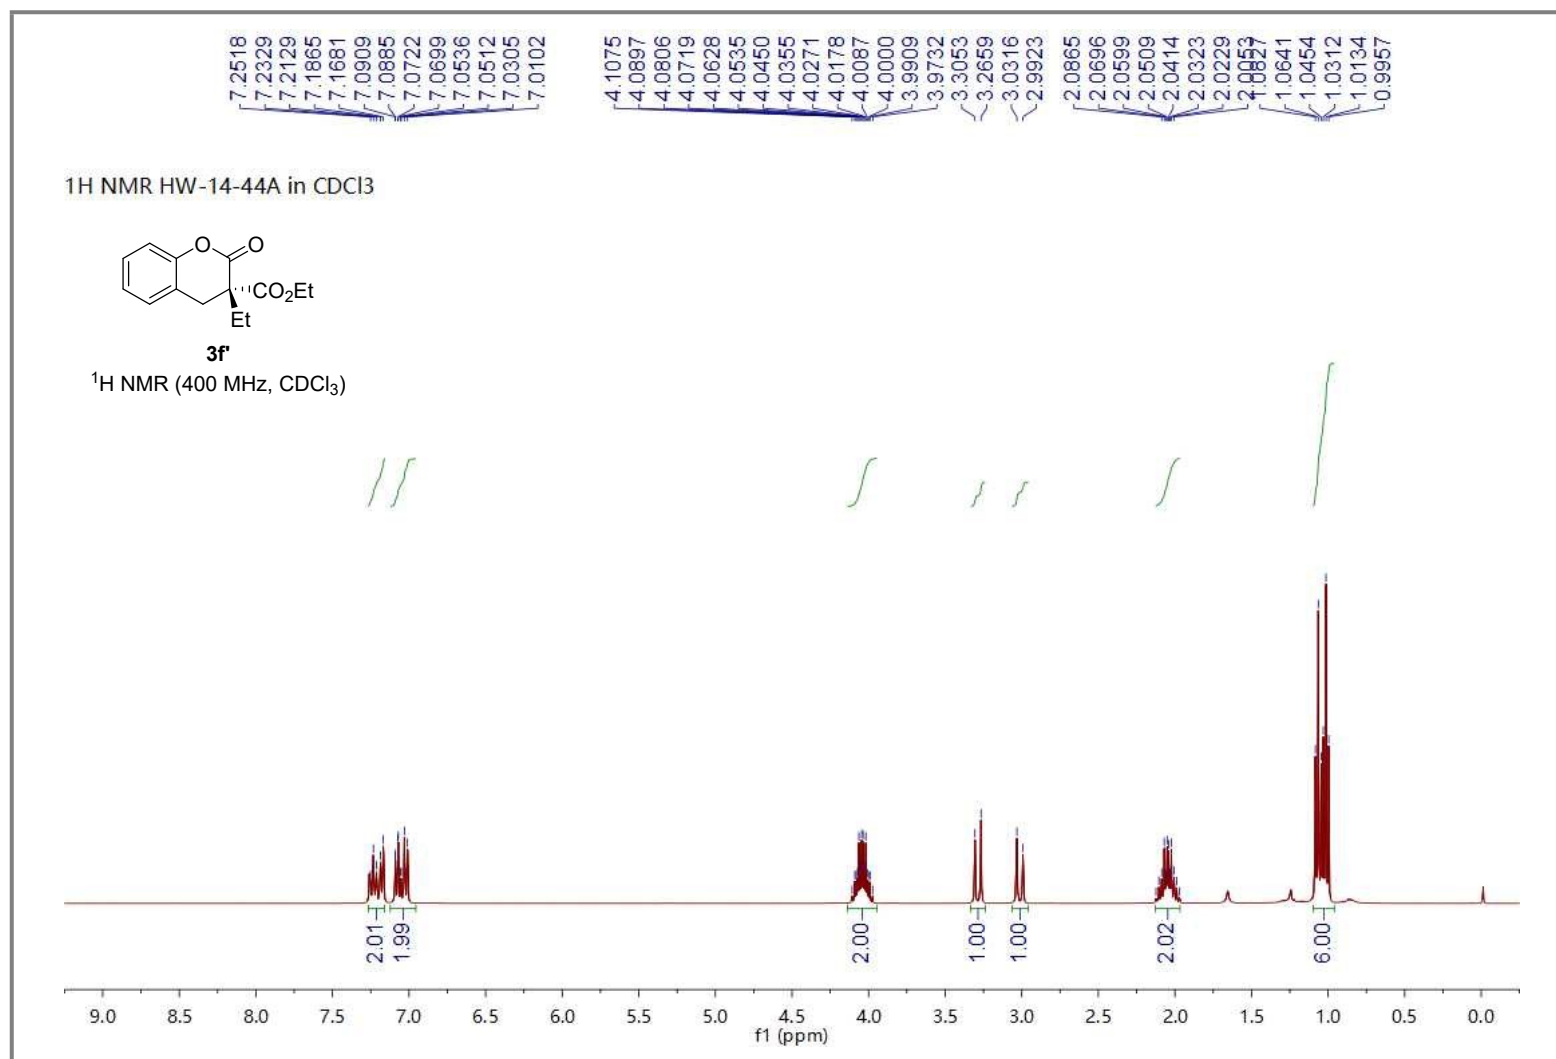



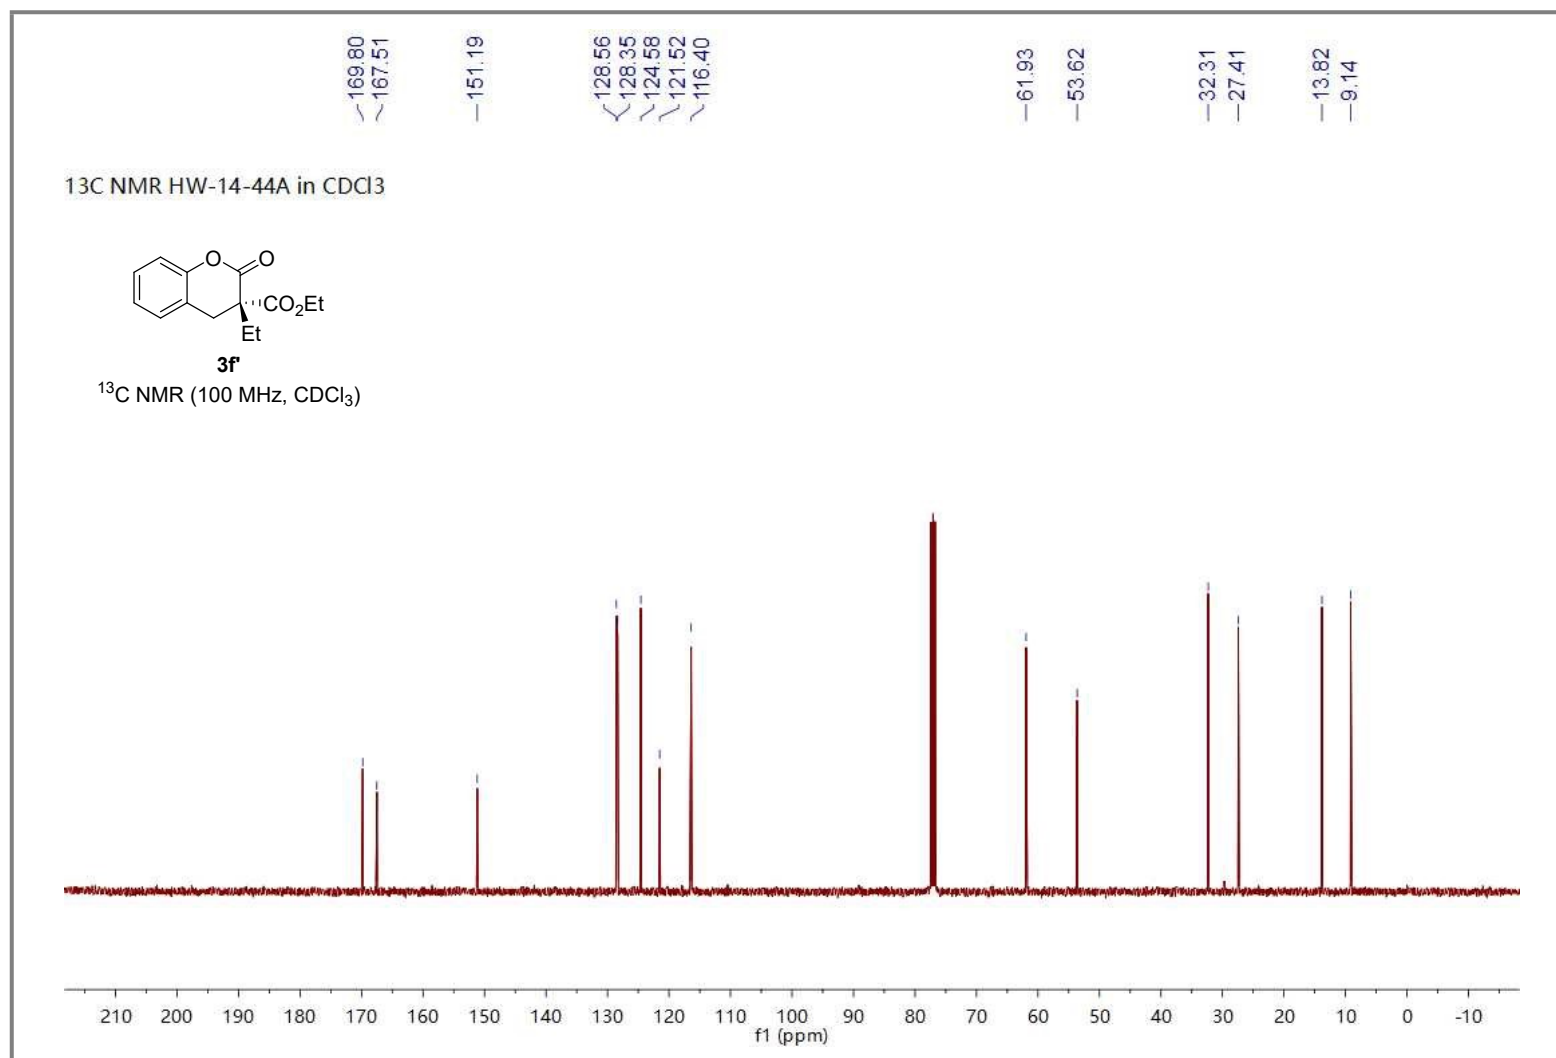

Data File C:\CHEM32\1\DATA\ZHOU-23\YZN022940.D  
 Sample Name: HW-14-34A SM+/-

=====  
 Acq. Operator :  
 Acq. Instrument : Instrument 1 Location : -  
 Injection Date : 4/22/2023 8:40:11 AM  
 Acq. Method : C:\CHEM32\1\METHODS\DEF\_LC.M  
 Last changed : 4/22/2023 8:35:28 AM  
 (modified after loading)  
 Analysis Method : C:\CHEM32\1\METHODS\DEF\_LC.M  
 Last changed : 10/17/2023 9:24:39 AM  
 (modified after loading)  
 Sample Info : AS-H, Hexane/i-PrOH = 90/10, 0.8mL/min, 30 oC, 230 nm

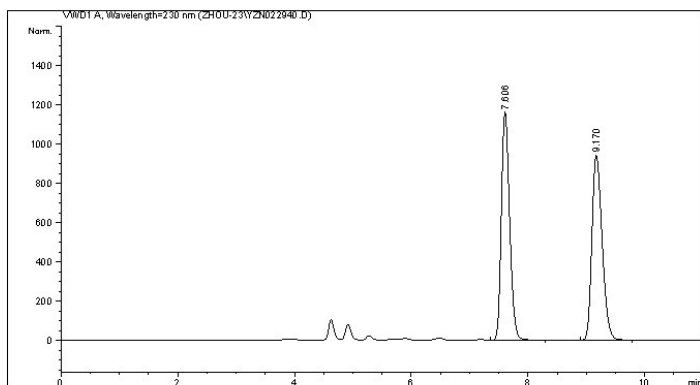

=====  
 Area Percent Report  
 =====

Sorted By : Signal  
 Multiplier: : 1.0000  
 Dilution: : 1.0000  
 Use Multiplier & Dilution Factor with ISTDs

Signal 1: VWD1 A, Wavelength=230 nm

| Peak # | RetTime [min] | Type | Width [min] | Area [mAU] | Height [mAU] | Area %  |
|--------|---------------|------|-------------|------------|--------------|---------|
| 1      | 7.606         | VB   | 0.1526      | 1.14103e4  | 1150.53186   | 49.8726 |
| 2      | 9.170         | VV   | 0.1903      | 1.14687e4  | 940.75964    | 50.1274 |

Totals : 2.28790e4 2101.29150

=====  
 \*\*\* End of Report \*\*\*

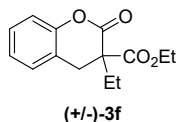

Data File C:\CHEM32\1\DATA\ZHOU-23\YZN022947.D  
 Sample Name: HW-14-32A SM

=====  
 Acq. Operator :  
 Acq. Instrument : Instrument 1 Location : -  
 Injection Date : 4/23/2023 1:27:16 AM  
 Acq. Method : C:\CHEM32\1\METHODS\DEF\_LC.M  
 Last changed : 4/23/2023 1:16:53 AM  
 (modified after loading)  
 Analysis Method : C:\CHEM32\1\METHODS\DEF\_LC.M  
 Last changed : 1/12/2024 3:53:05 AM  
 (modified after loading)  
 Sample Info : AS-H, Hexane/i-PrOH = 90/10, 0.8 mL/min, 30 oC, 230 nm

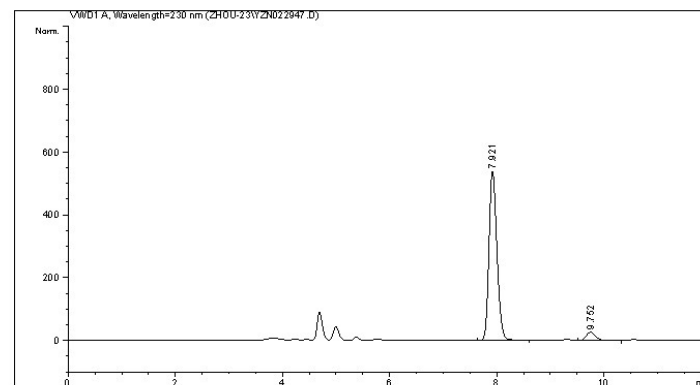

=====  
 Area Percent Report  
 =====

Sorted By : Signal  
 Multiplier: : 1.0000  
 Dilution: : 1.0000  
 Use Multiplier & Dilution Factor with ISTDs

Signal 1: VWD1 A, Wavelength=230 nm

| Peak # | RetTime [min] | Type | Width [min] | Area [mAU] | Height [mAU] | Area %  |
|--------|---------------|------|-------------|------------|--------------|---------|
| 1      | 7.921         | VV   | 0.1605      | 5609.98291 | 540.15234    | 94.2767 |
| 2      | 9.752         | VV   | 0.1929      | 340.56915  | 27.16190     | 5.7233  |

Totals : 5950.55206 567.31424

=====  
 \*\*\* End of Report \*\*\*

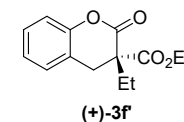

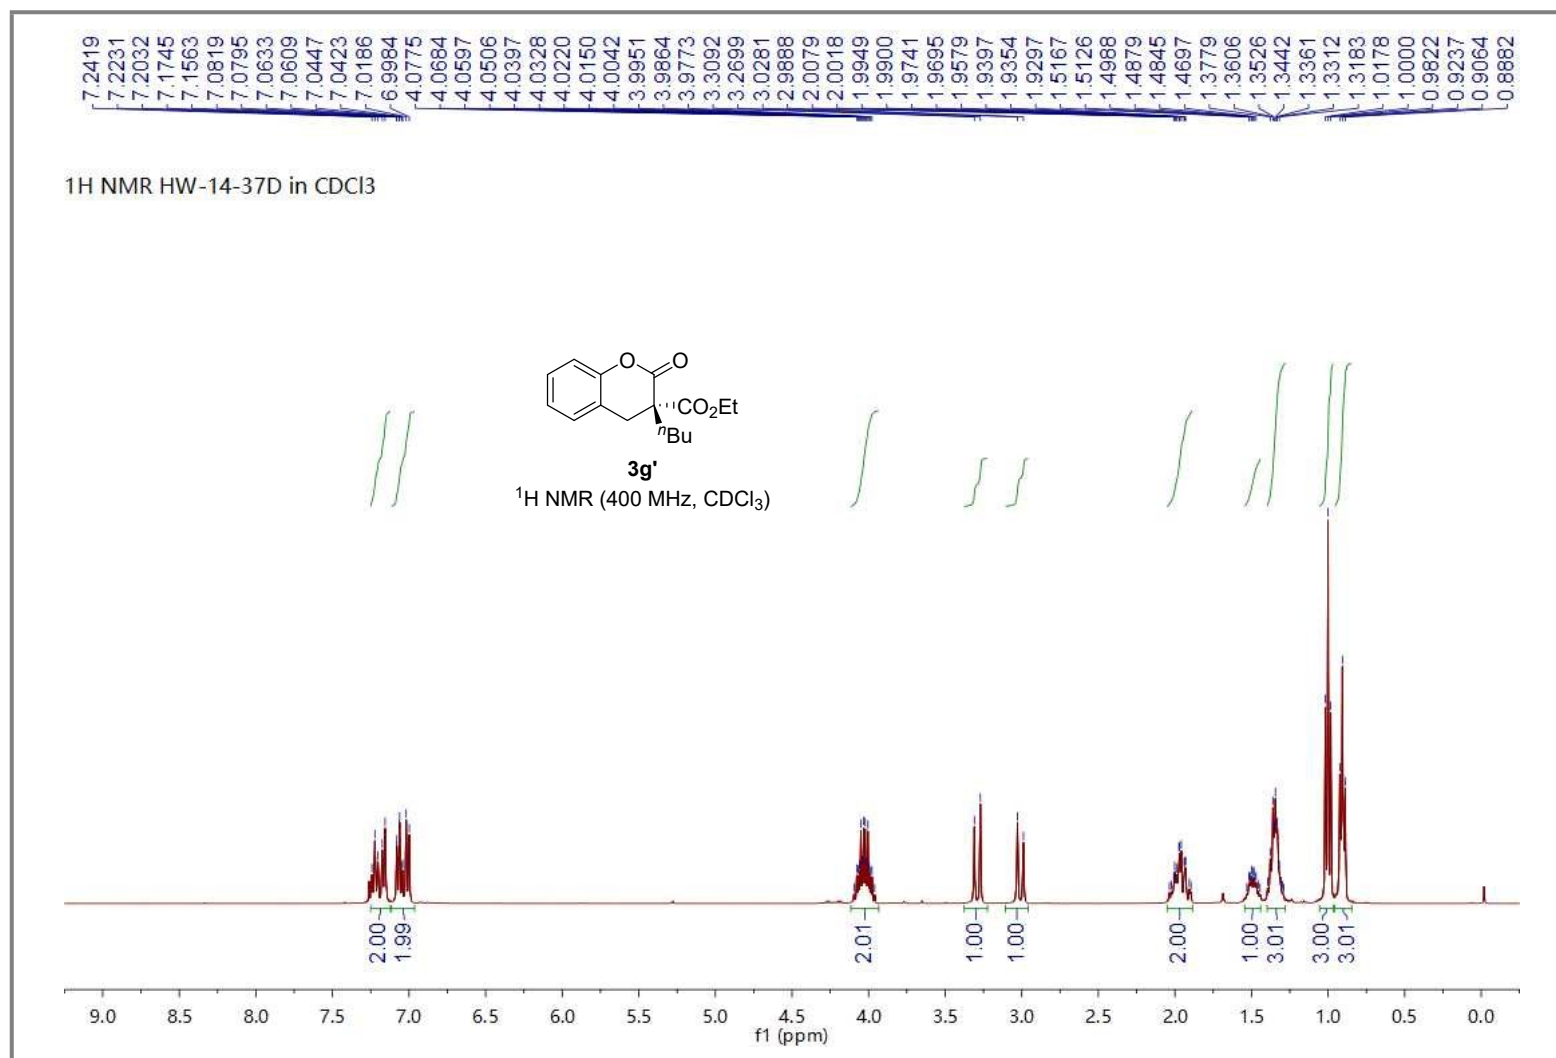

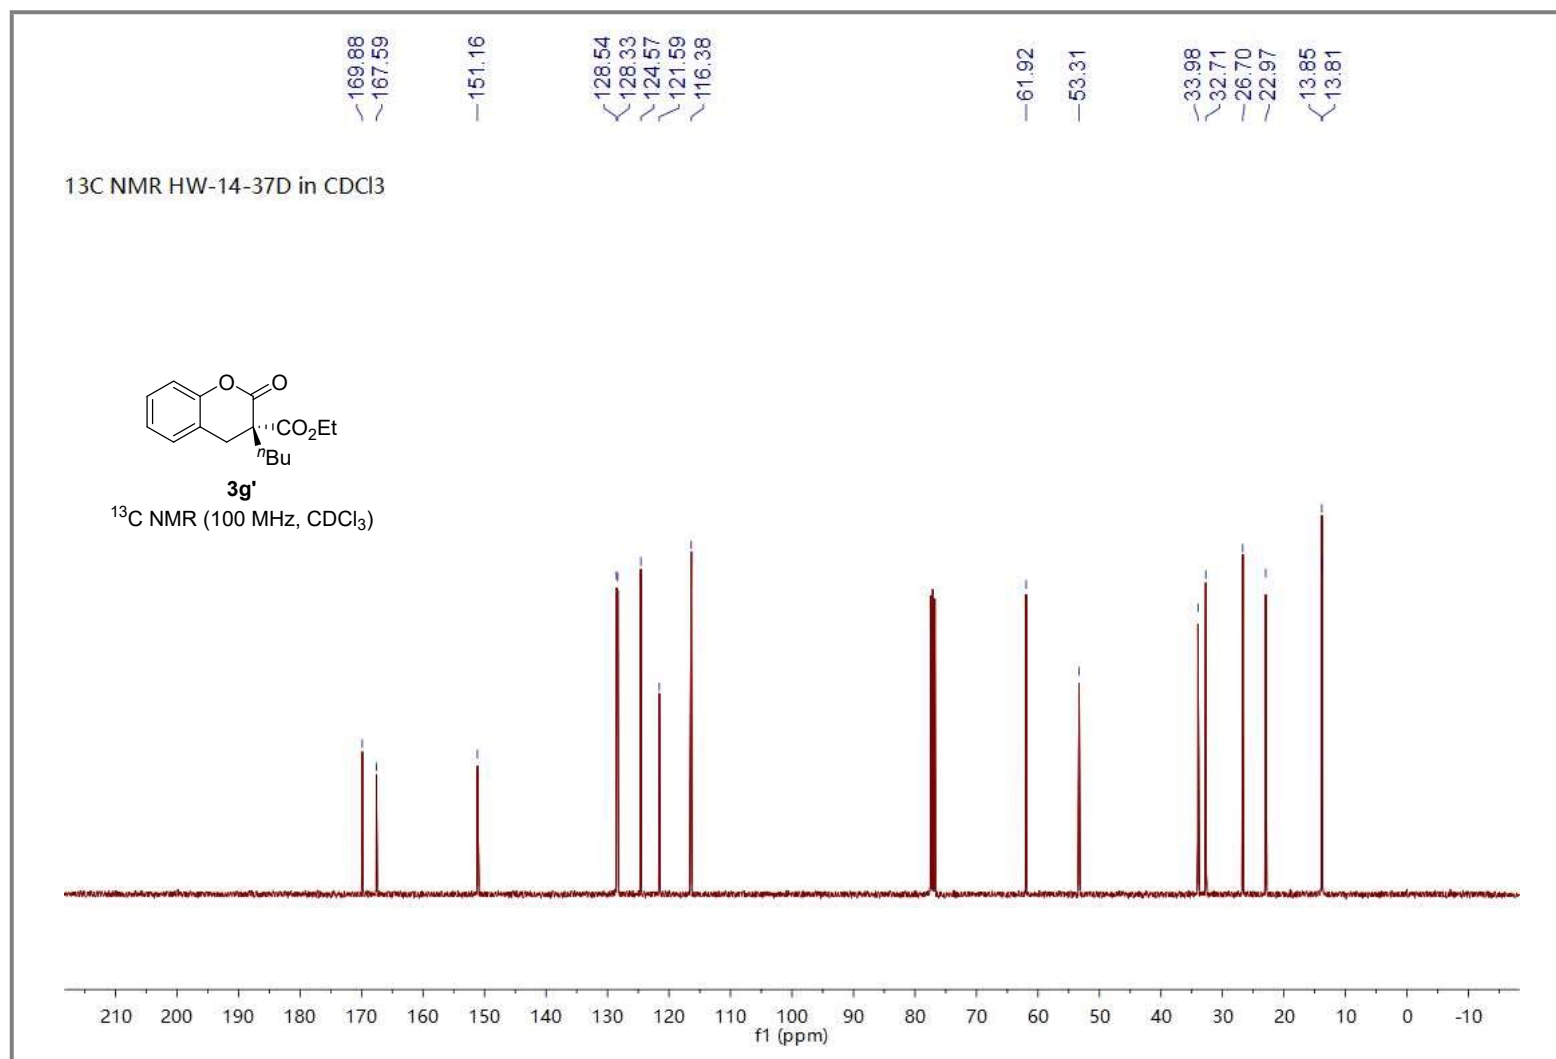

Data File C:\CHEM32\1\DATA\ZHOU-23\YZN022943.D  
Sample Name: HW-14-41C SM+/-

=====  
Acq. Operator :  
Acq. Instrument : Instrument 1 Location : -  
Injection Date : 4/22/2023 9:33:01 AM  
Acq. Method : C:\CHEM32\1\METHODS\DEF\_LC.M  
Last changed : 4/22/2023 9:32:44 AM  
(modified after loading)  
Analysis Method : C:\CHEM32\1\METHODS\DEF\_LC.M  
Last changed : 10/17/2023 9:19:47 AM  
(modified after loading)  
Sample Info : AS-H, Hexane/i-PrOH = 90/10, 0.8mL/min, 30 oC, 230 nm

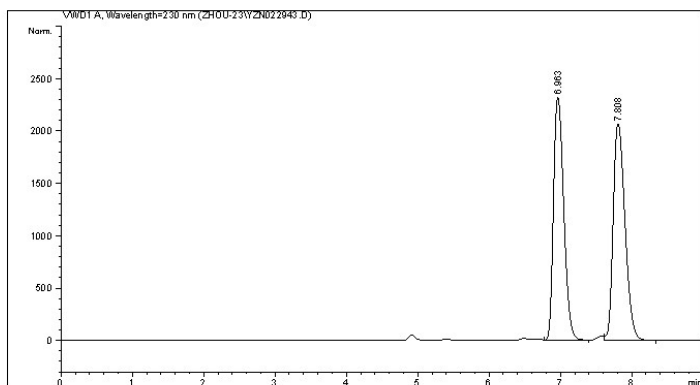

=====  
Area Percent Report  
=====

Sorted By : Signal  
Multiplier: : 1.0000  
Dilution: : 1.0000  
Use Multiplier & Dilution Factor with ISTDs

Signal 1: VWD1 A, Wavelength=230 nm

| Peak # | RetTime [min] | Type | Width [min] | Area [mAU] | Height [mAU] | Area %  |
|--------|---------------|------|-------------|------------|--------------|---------|
| 1      | 6.963         | VV   | 0.1572      | 2.32125e4  | 2325.45605   | 49.3297 |
| 2      | 7.808         | VV   | 0.1810      | 2.38433e4  | 2069.13452   | 50.6703 |

Totals : 4.70558e4 4394.59058

=====  
\*\*\* End of Report \*\*\*

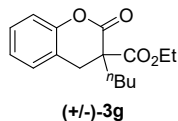

Instrument 1 10/17/2023 9:19:50 AM

Page 1 of 1

Data File C:\CHEM32\1\DATA\ZHOU-23\YZN022974.D  
Sample Name: HW-14-41C SM'

=====  
Acq. Operator :  
Acq. Instrument : Instrument 1 Location : -  
Injection Date : 4/26/2023 4:05:12 AM  
Acq. Method : C:\CHEM32\1\METHODS\DEF\_LC.M  
Last changed : 4/26/2023 4:04:48 AM  
(modified after loading)  
Analysis Method : C:\CHEM32\1\METHODS\DEF\_LC.M  
Last changed : 10/17/2023 9:20:58 AM  
(modified after loading)  
Sample Info : AS-H, Hexane/i-PrOH = 90/10, 0.8 mL/min, 30 oC, 230 nm

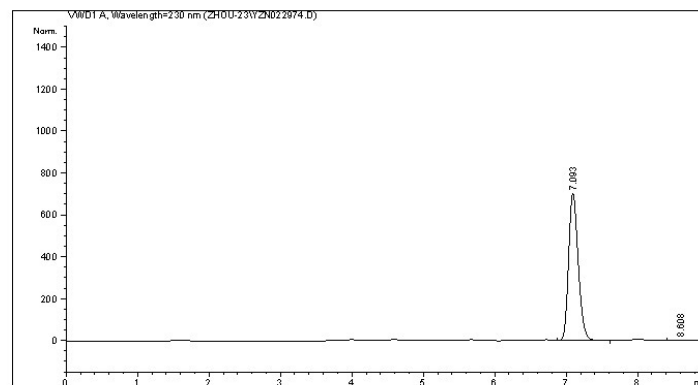

=====  
Area Percent Report  
=====

Sorted By : Signal  
Multiplier: : 1.0000  
Dilution: : 1.0000  
Use Multiplier & Dilution Factor with ISTDs

Signal 1: VWD1 A, Wavelength=230 nm

| Peak # | RetTime [min] | Type | Width [min] | Area [mAU] | Height [mAU] | Area %  |
|--------|---------------|------|-------------|------------|--------------|---------|
| 1      | 7.093         | VV   | 0.1444      | 6612.80273 | 704.59741    | 99.4928 |
| 2      | 8.608         | WB   | 0.1508      | 33.71329   | 3.43738      | 0.5072  |

Totals : 6646.51603 708.03480

=====  
\*\*\* End of Report \*\*\*

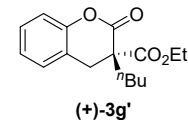

Instrument 1 10/17/2023 9:21:04 AM

Page 1 of 1

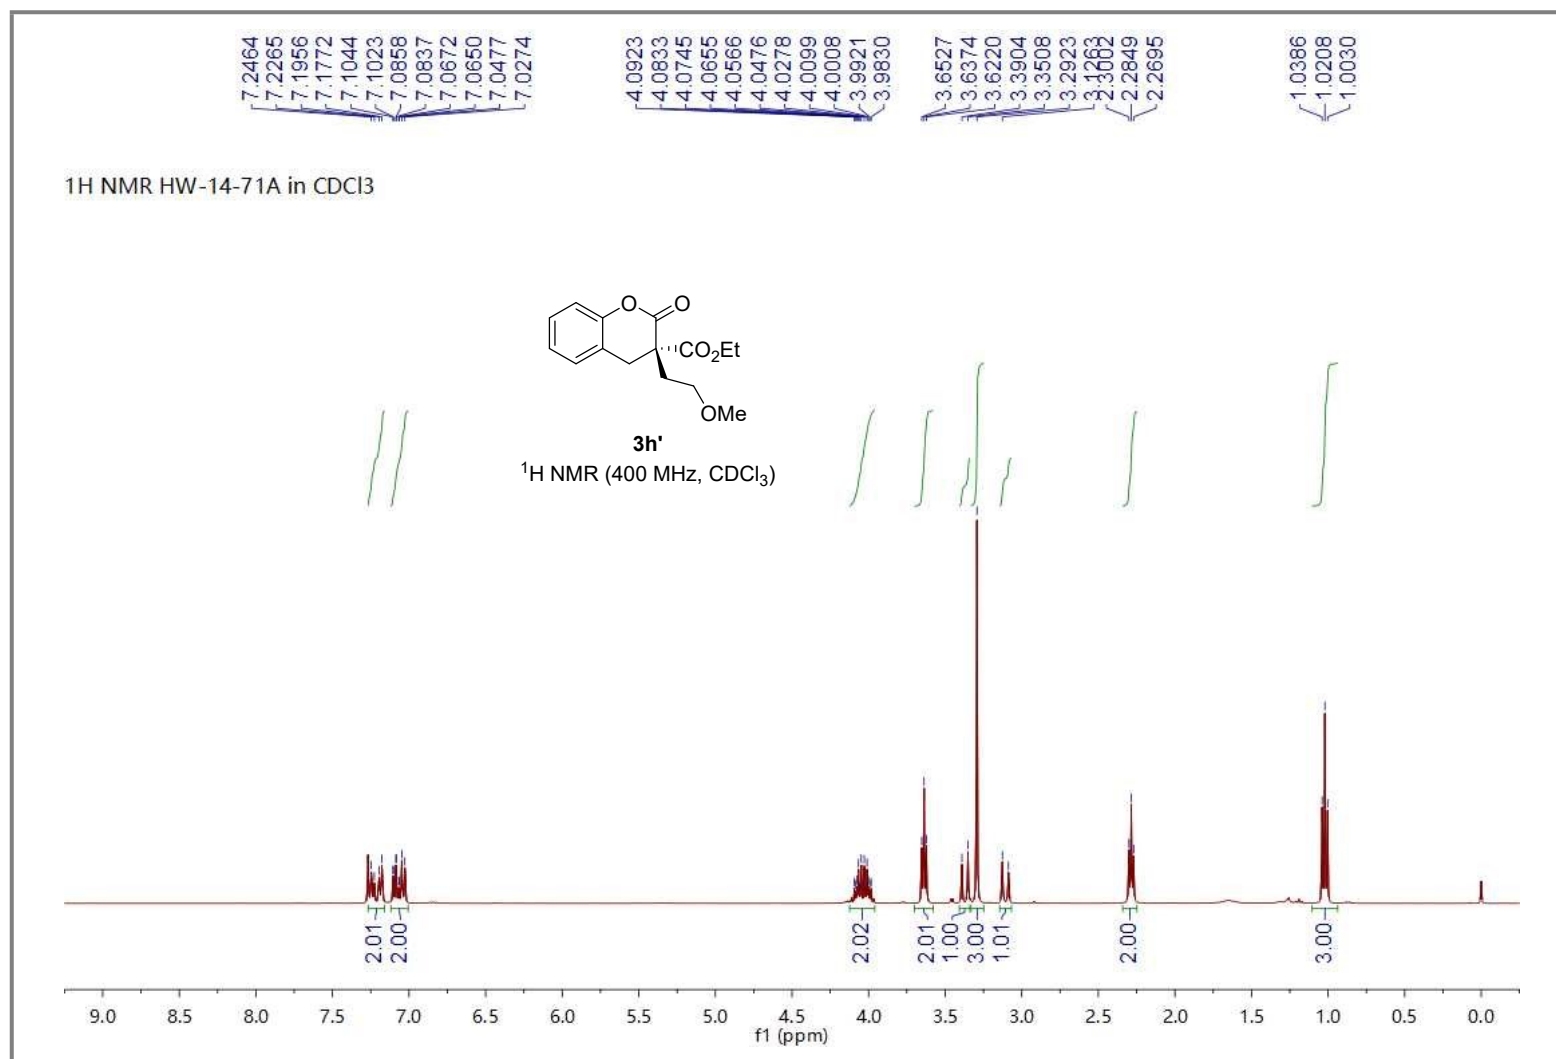

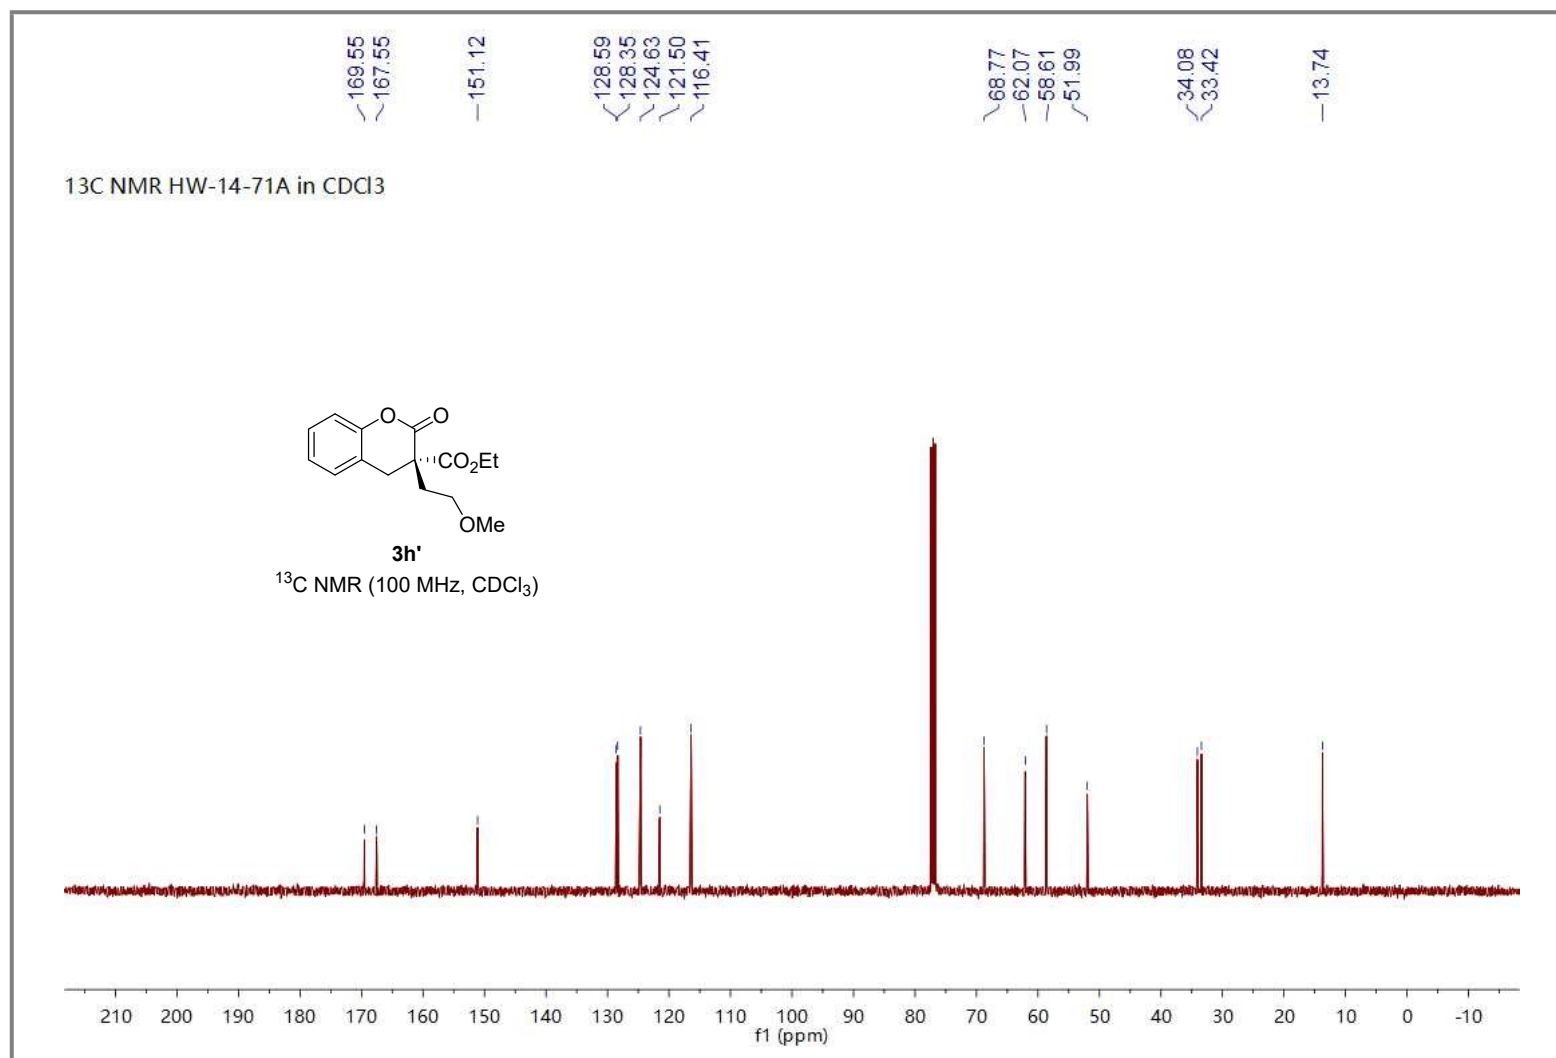

Data File C:\CHEM32\1\DATA\ZHOU-23\YZN023196.D  
 Sample Name: HW-14-70A +/-

=====  
 Acq. Operator :  
 Acq. Instrument : Instrument 1 Location : -  
 Injection Date : 5/26/2023 4:31:55 AM  
 Acq. Method : C:\CHEM32\1\METHODS\DEF\_LC.M  
 Last changed : 5/26/2023 4:31:26 AM  
 (modified after loading)  
 Analysis Method : C:\CHEM32\1\METHODS\DEF\_LC.M  
 Last changed : 10/17/2023 9:28:03 AM  
 (modified after loading)  
 Sample Info : AS-H, Hexane/i-PrOH = 90/10, 0.8 mL/min, 30 oC, 230 nm

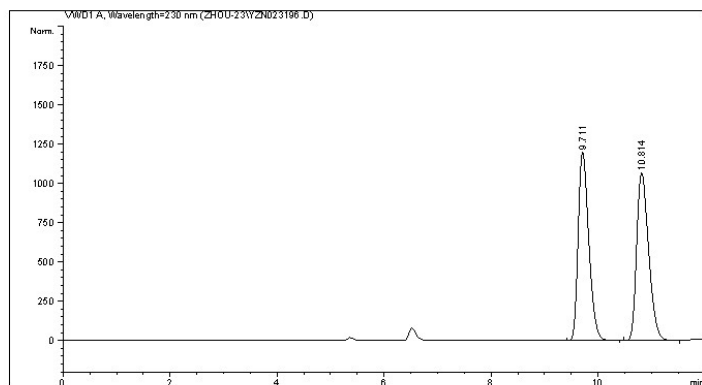

=====  
 Area Percent Report  
 =====

Sorted By : Signal  
 Multiplier: : 1.0000  
 Dilution: : 1.0000  
 Use Multiplier & Dilution Factor with ISTDs

Signal 1: VWD1 A, Wavelength=230 nm

| Peak # | RetTime [min] | Type | Width [min] | Area [mAU] | Height [mAU] | Area %  |
|--------|---------------|------|-------------|------------|--------------|---------|
| 1      | 9.711         | BB   | 0.2129      | 1.64655e4  | 1196.65088   | 49.8354 |
| 2      | 10.814        | BV   | 0.2412      | 1.65743e4  | 1065.27185   | 50.1646 |

Totals : 3.30399e4 2261.92273

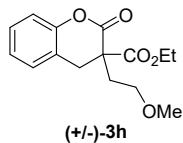

=====  
 \*\*\* End of Report \*\*\*

Instrument 1 10/17/2023 9:28:06 AM

Page 1 of 1

Data File C:\CHEM32\1\DATA\ZHOU-23\YZN023302.D  
 Sample Name: HW-14-80 SM

=====  
 Acq. Operator :  
 Acq. Instrument : Instrument 1 Location : -  
 Injection Date : 6/13/2023 7:49:12 AM  
 Acq. Method : C:\CHEM32\1\METHODS\DEF\_LC.M  
 Last changed : 6/13/2023 7:44:25 AM  
 (modified after loading)  
 Analysis Method : C:\CHEM32\1\METHODS\DEF\_LC.M  
 Last changed : 11/30/2023 9:02:05 AM  
 (modified after loading)  
 Sample Info : AS-H, Hexane/i-PrOH = 90/10, 0.8 mL/min, 30 oC, 230 nm

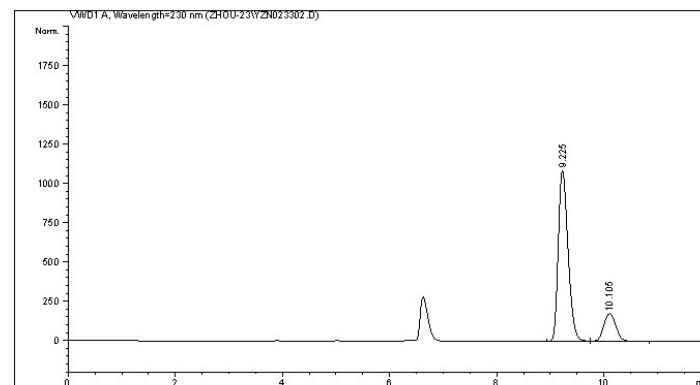

=====  
 Area Percent Report  
 =====

Sorted By : Signal  
 Multiplier: : 1.0000  
 Dilution: : 1.0000  
 Use Multiplier & Dilution Factor with ISTDs

Signal 1: VWD1 A, Wavelength=230 nm

| Peak # | RetTime [min] | Type | Width [min] | Area [mAU] | Height [mAU] | Area %  |
|--------|---------------|------|-------------|------------|--------------|---------|
| 1      | 9.225         | VV   | 0.1976      | 1.38067e4  | 1087.73401   | 83.2211 |
| 2      | 10.105        | WB   | 0.2539      | 2783.67700 | 175.13556    | 16.7789 |

Totals : 1.65904e4 1262.86957

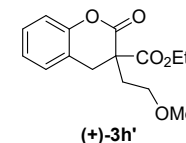

=====  
 \*\*\* End of Report \*\*\*

Instrument 1 11/30/2023 9:02:11 AM

Page 1 of 1



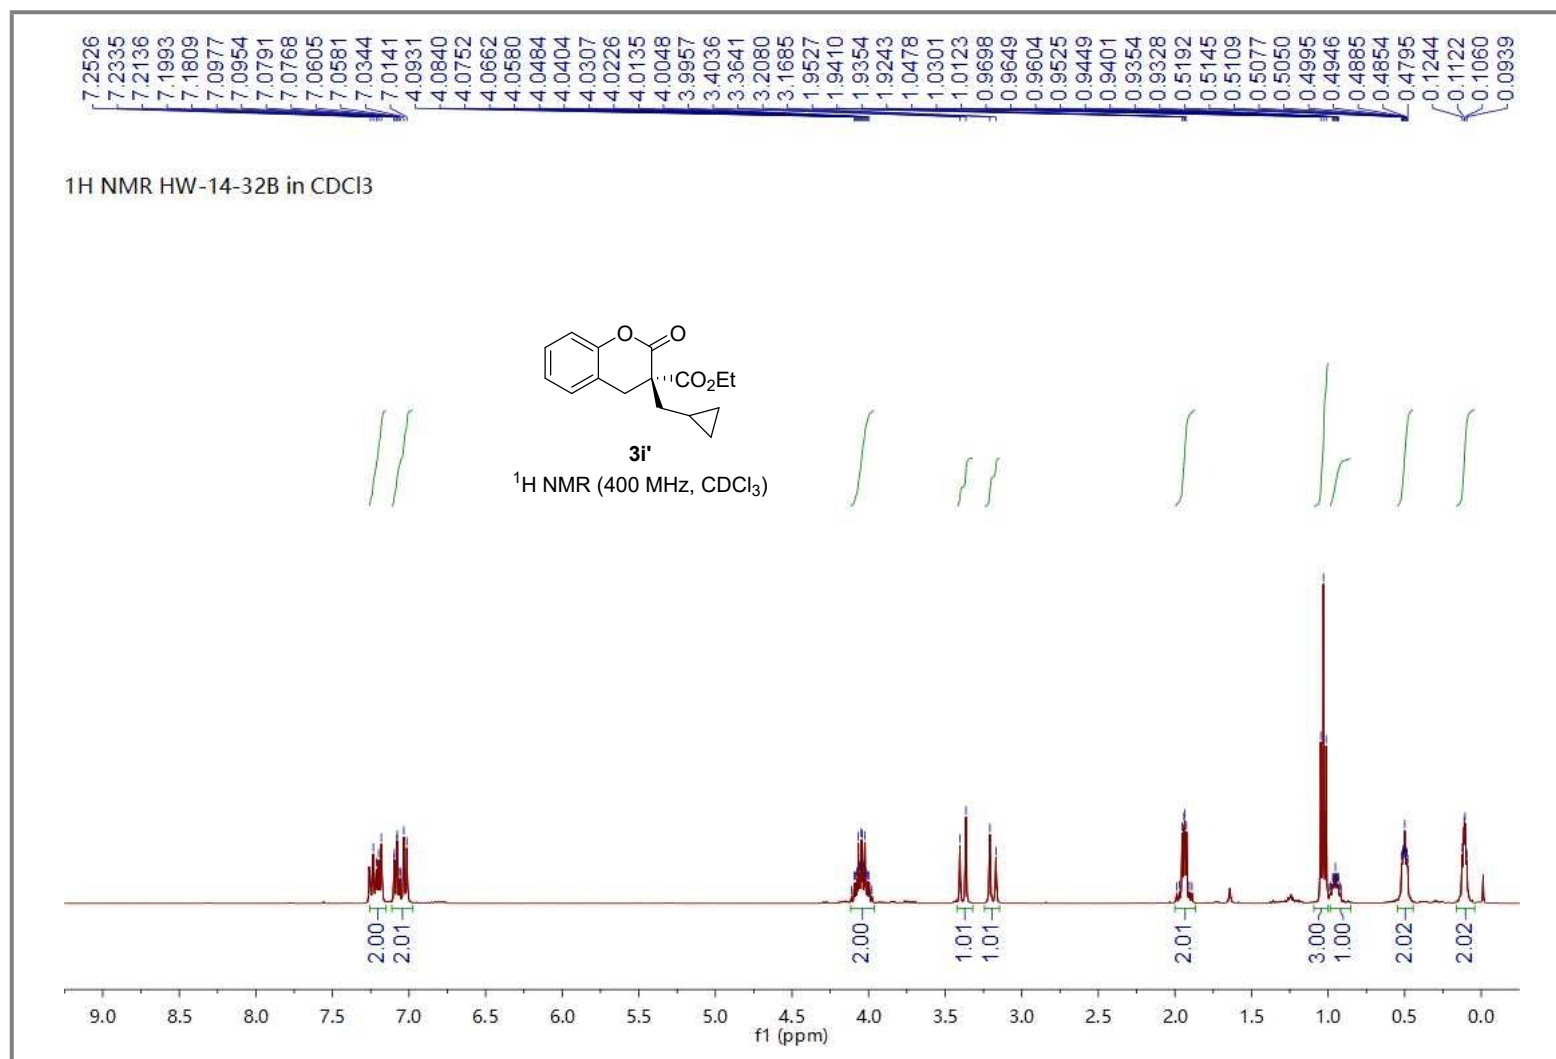

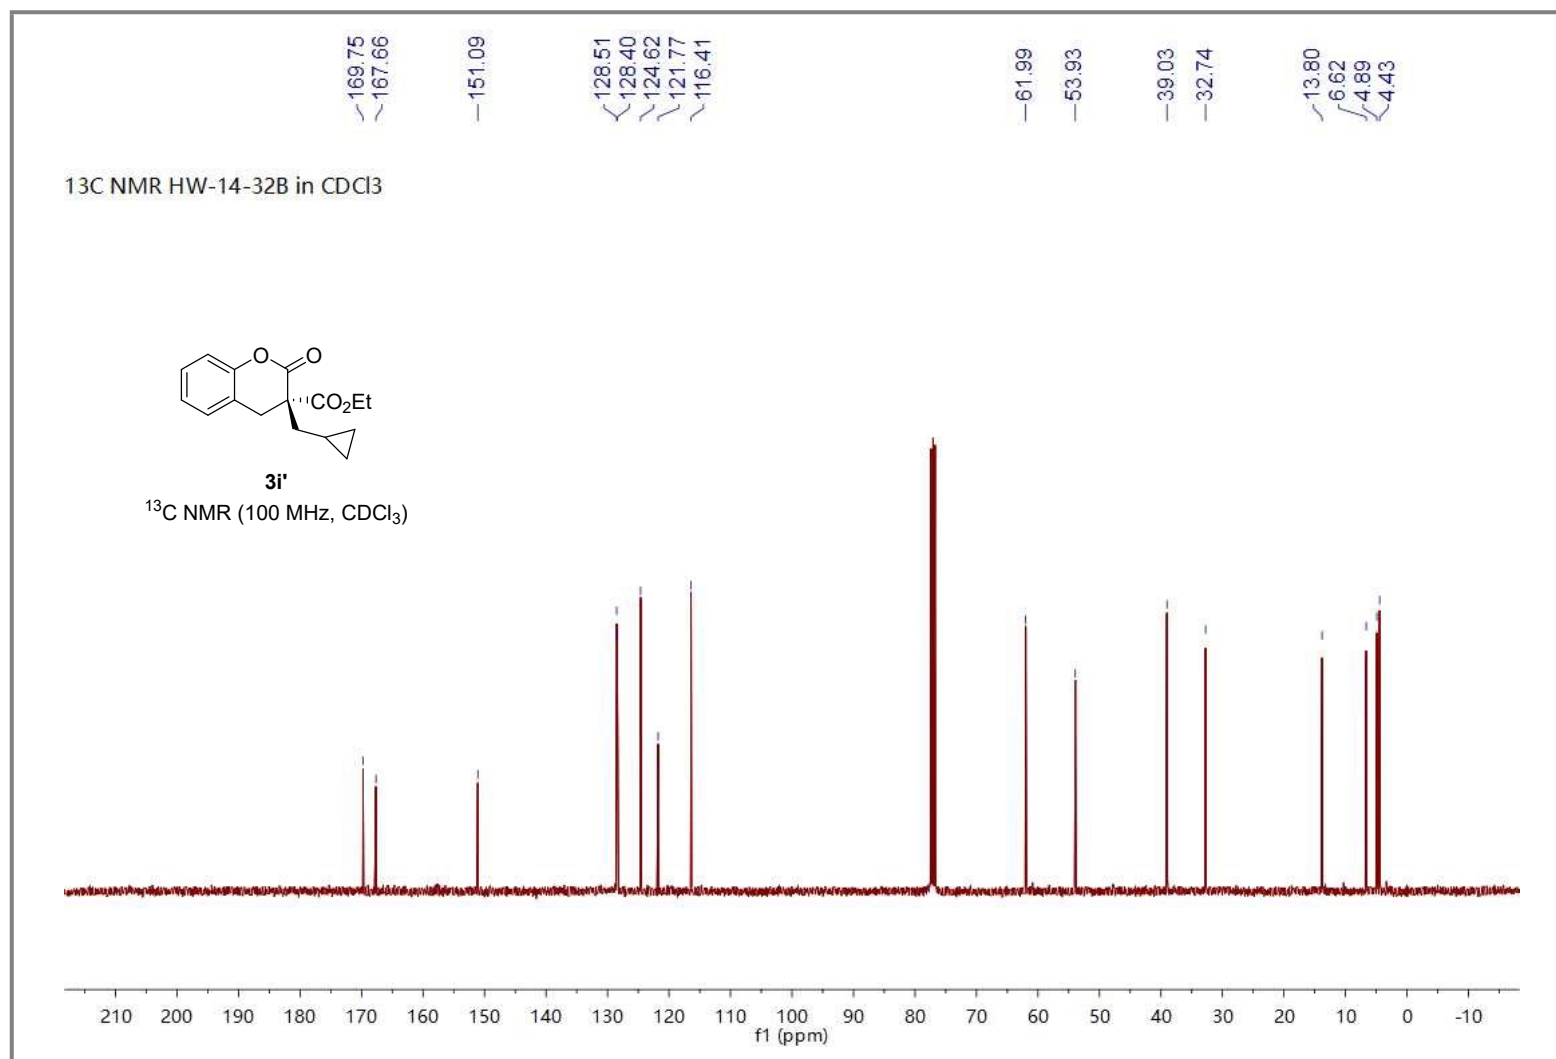

Data File C:\CHEM32\1\DATA\ZHOU-23\YZN022941.D  
 Sample Name: HW-14-34B SM+/-

=====  
 Acq. Operator :  
 Acq. Instrument : Instrument 1 Location : -  
 Injection Date : 4/22/2023 8:53:22 AM  
 Acq. Method : C:\CHEM32\1\METHODS\DEF\_LC.M  
 Last changed : 4/22/2023 8:52:29 AM  
 (modified after loading)  
 Analysis Method : C:\CHEM32\1\METHODS\DEF\_LC.M  
 Last changed : 10/17/2023 9:32:09 AM  
 (modified after loading)  
 Sample Info : AS-H, Hexane/i-PrOH = 90/10, 0.8mL/min, 30 oC, 230 nm

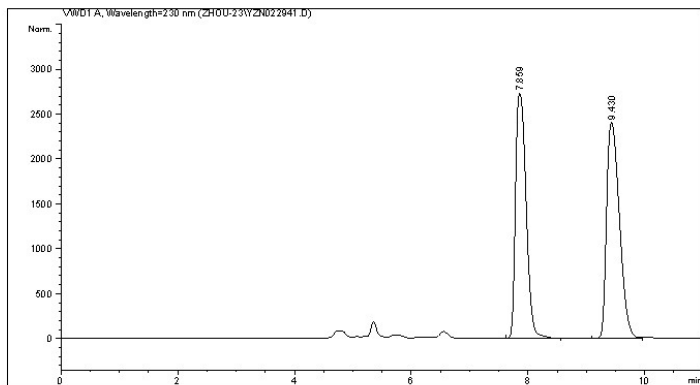

=====  
 Area Percent Report  
 =====

Sorted By : Signal  
 Multiplier: : 1.0000  
 Dilution: : 1.0000  
 Use Multiplier & Dilution Factor with ISTDs

Signal 1: VWD1 A, Wavelength=230 nm

| Peak # | RetTime [min] | Type | Width [min] | Area mAU  | Height %s  | Area [mAU] | Area % |
|--------|---------------|------|-------------|-----------|------------|------------|--------|
| 1      | 7.859         | VV   | 0.1994      | 3.43748e4 | 2727.70850 | 48.4090    |        |
| 2      | 9.430         | VV   | 0.2419      | 3.66344e4 | 2403.72900 | 51.5910    |        |

Totals : 7.10092e4 5131.43750

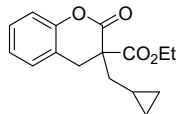

(+/-)-3i

=====  
 \*\*\* End of Report \*\*\*

Instrument 1 10/17/2023 9:32:12 AM

Page 1 of 1

Data File C:\CHEM32\1\DATA\ZHOU-23\YZN023007.D  
 Sample Name: HW-14-47A SM

=====  
 Acq. Operator :  
 Acq. Instrument : Instrument 1 Location : -  
 Injection Date : 5/5/2023 3:58:08 AM  
 Acq. Method : C:\CHEM32\1\METHODS\DEF\_LC.M  
 Last changed : 5/5/2023 3:57:05 AM  
 (modified after loading)  
 Analysis Method : C:\CHEM32\1\METHODS\DEF\_LC.M  
 Last changed : 10/17/2023 9:34:49 AM  
 (modified after loading)  
 Sample Info : AS-H, Hexane/i-PrOH = 90/10, 0.8 mL/min, 30 oC, 230nm

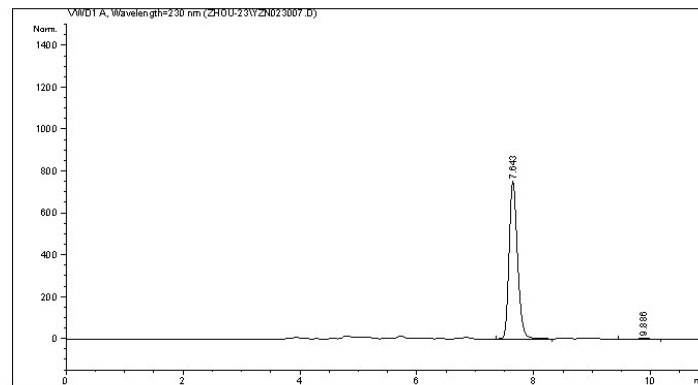

=====  
 Area Percent Report  
 =====

Sorted By : Signal  
 Multiplier: : 1.0000  
 Dilution: : 1.0000  
 Use Multiplier & Dilution Factor with ISTDs

Signal 1: VWD1 A, Wavelength=230 nm

| Peak # | RetTime [min] | Type | Width [min] | Area mAU   | Height %s | Area [mAU] | Area % |
|--------|---------------|------|-------------|------------|-----------|------------|--------|
| 1      | 7.643         | VV   | 0.1588      | 7590.19287 | 750.01428 | 99.3829    |        |
| 2      | 9.886         | VV   | 0.2269      | 47.12951   | 2.95362   | 0.6171     |        |

Totals : 7637.32238 752.96790

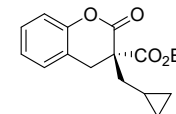

(+)-3i'

=====  
 \*\*\* End of Report \*\*\*

Instrument 1 10/17/2023 9:34:51 AM

Page 1 of 1

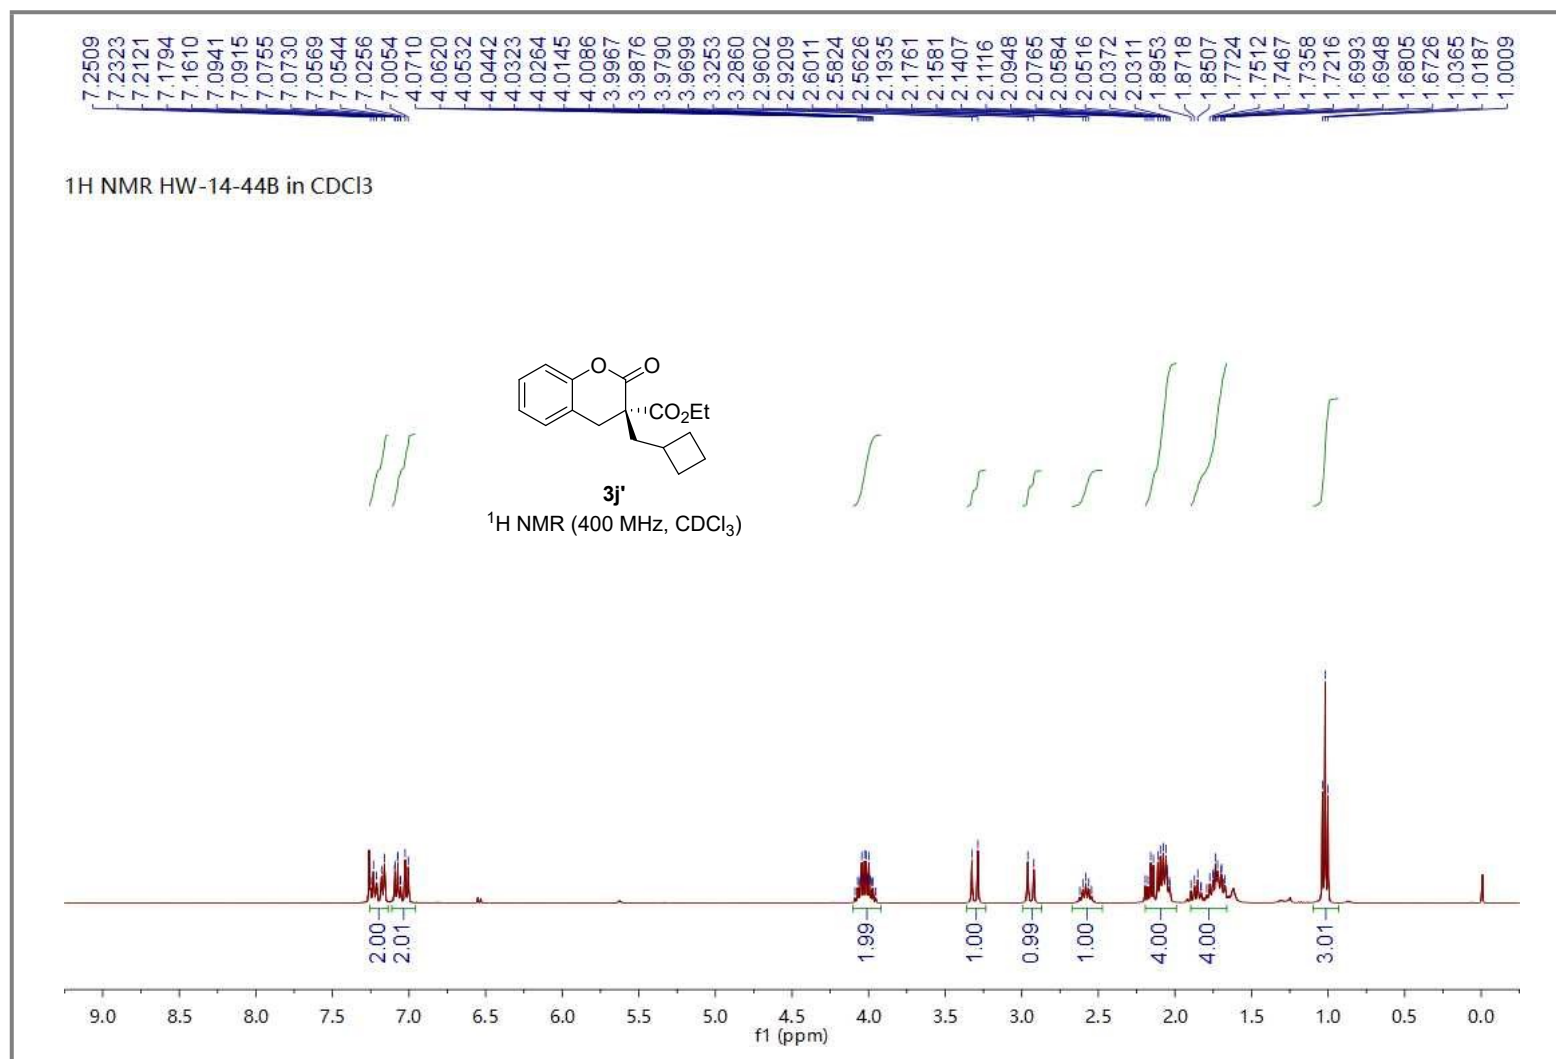

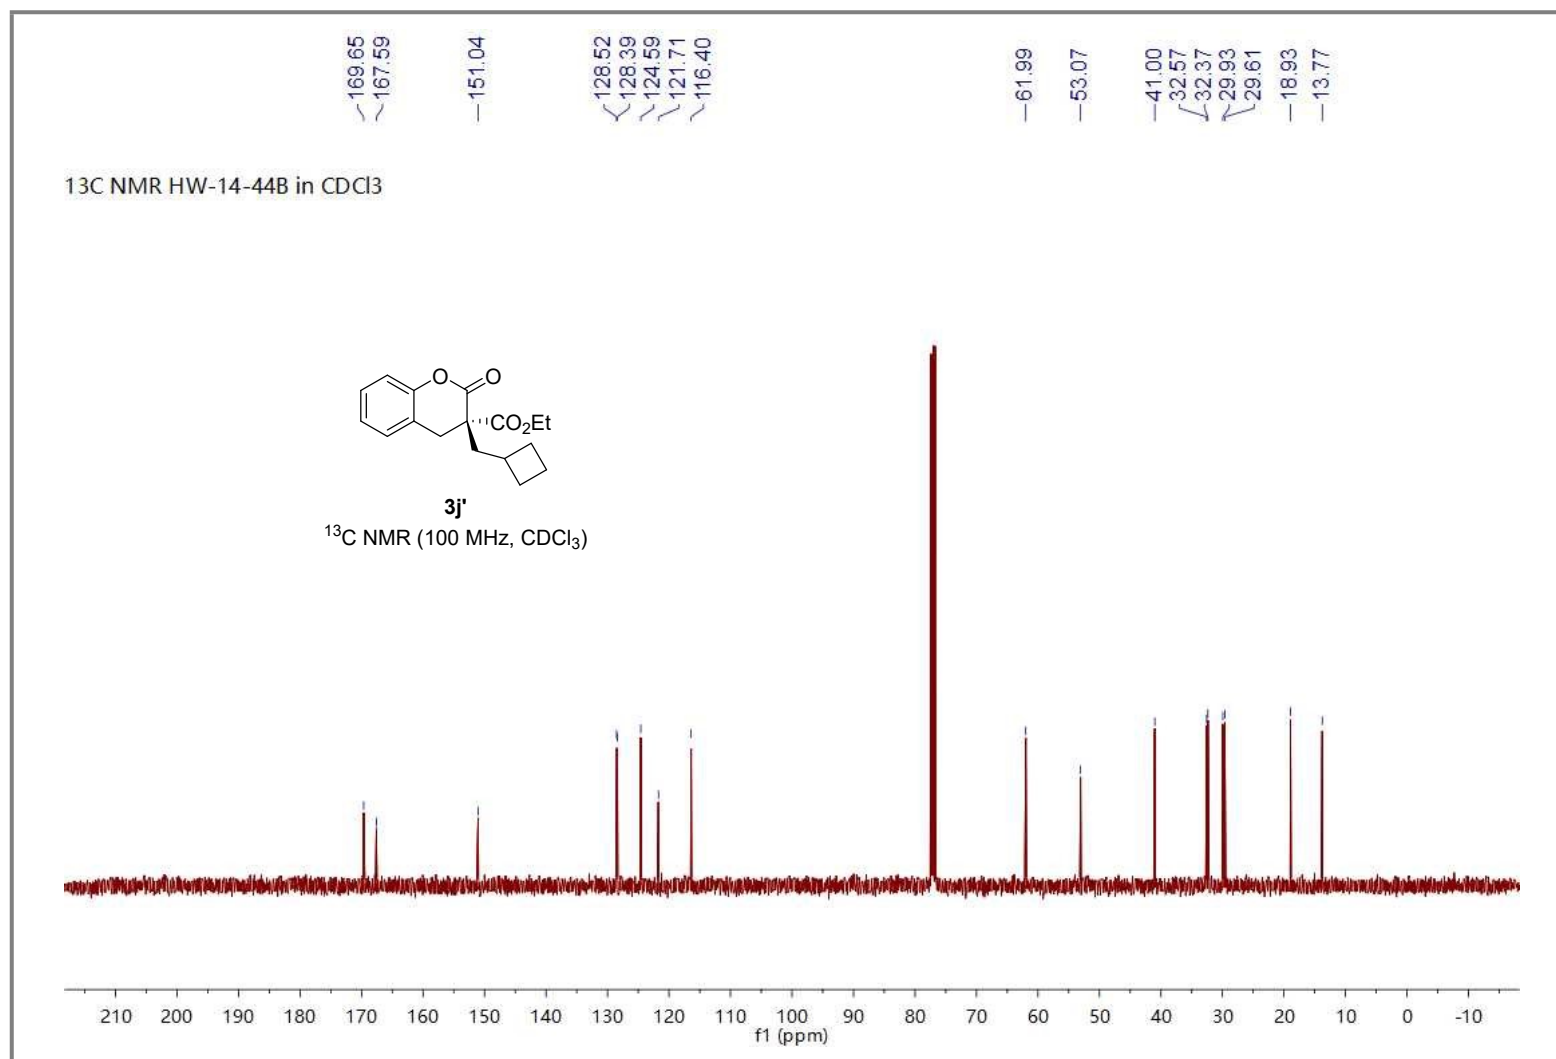

Data File C:\CHEM32\1\DATA\ZHOU-23\YZN023005.D  
Sample Name: HW-14-47B SM+/-

=====  
Acq. Operator :  
Acq. Instrument : Instrument 1 Location : -  
Injection Date : 5/5/2023 3:26:16 AM  
Acq. Method : C:\CHEM32\1\METHODS\DEF\_LC.M  
Last changed : 5/5/2023 3:17:54 AM  
(modified after loading)  
Analysis Method : C:\CHEM32\1\METHODS\DEF\_LC.M  
Last changed : 10/17/2023 9:39:16 AM  
Sample Info : AS-H, Hexane/i-PrOH = 90/10, 0.8 mL/min, 30 oC, 230nm

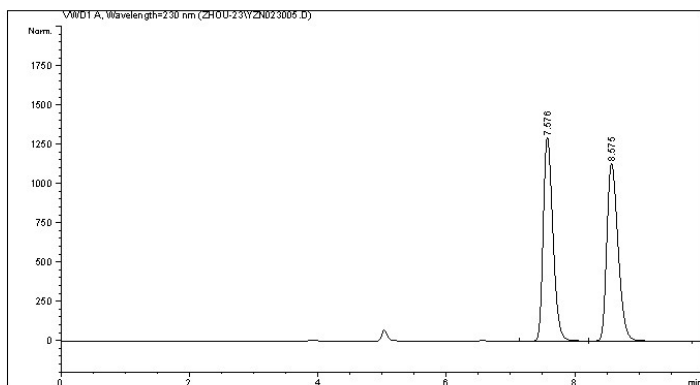

=====  
Area Percent Report  
=====

Sorted By : Signal  
Multiplier: : 1.0000  
Dilution: : 1.0000  
Use Multiplier & Dilution Factor with ISTDs

Signal 1: VWD1 A, Wavelength=230 nm

| Peak # | RetTime [min] | Type | Width [min] | Area mAU  | Height %s  | Area [mAU] | Area % |
|--------|---------------|------|-------------|-----------|------------|------------|--------|
| 1      | 7.576         | VV   | 0.1639      | 1.36363e4 | 1291.87915 | 49.7430    |        |
| 2      | 8.575         | VV   | 0.1891      | 1.37773e4 | 1127.55725 | 50.2570    |        |

Totals : 2.74136e4 2419.43640

=====  
\*\*\* End of Report \*\*\*

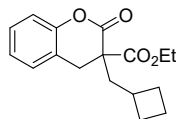

(+/-)-3j

Data File C:\CHEM32\1\DATA\ZHOU-23\YZN023132.D  
Sample Name: HW-14-56A SM

=====  
Acq. Operator :  
Acq. Instrument : Instrument 1 Location : -  
Injection Date : 5/20/2023 8:16:59 AM  
Acq. Method : C:\CHEM32\1\METHODS\DEF\_LC.M  
Last changed : 5/20/2023 7:53:15 AM  
(modified after loading)  
Analysis Method : C:\CHEM32\1\METHODS\DEF\_LC.M  
Last changed : 10/17/2023 9:40:58 AM  
Sample Info : AS-H, Hexane/i-PrOH = 90/10, 0.8 mL/min, 30 oC, 230 nm

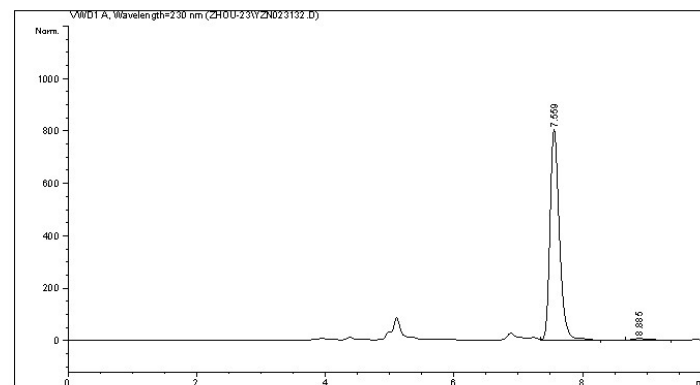

=====  
Area Percent Report  
=====

Sorted By : Signal  
Multiplier: : 1.0000  
Dilution: : 1.0000  
Use Multiplier & Dilution Factor with ISTDs

Signal 1: VWD1 A, Wavelength=230 nm

| Peak # | RetTime [min] | Type | Width [min] | Area mAU   | Height %s | Area [mAU] | Area % |
|--------|---------------|------|-------------|------------|-----------|------------|--------|
| 1      | 7.559         | VV   | 0.1608      | 8269.88477 | 803.69092 | 97.7994    |        |
| 2      | 8.885         | VV   | 0.3327      | 186.08423  | 7.74540   | 2.2006     |        |

Totals : 8455.96899 811.43632

=====  
\*\*\* End of Report \*\*\*

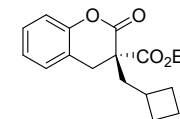

(+)-3j'

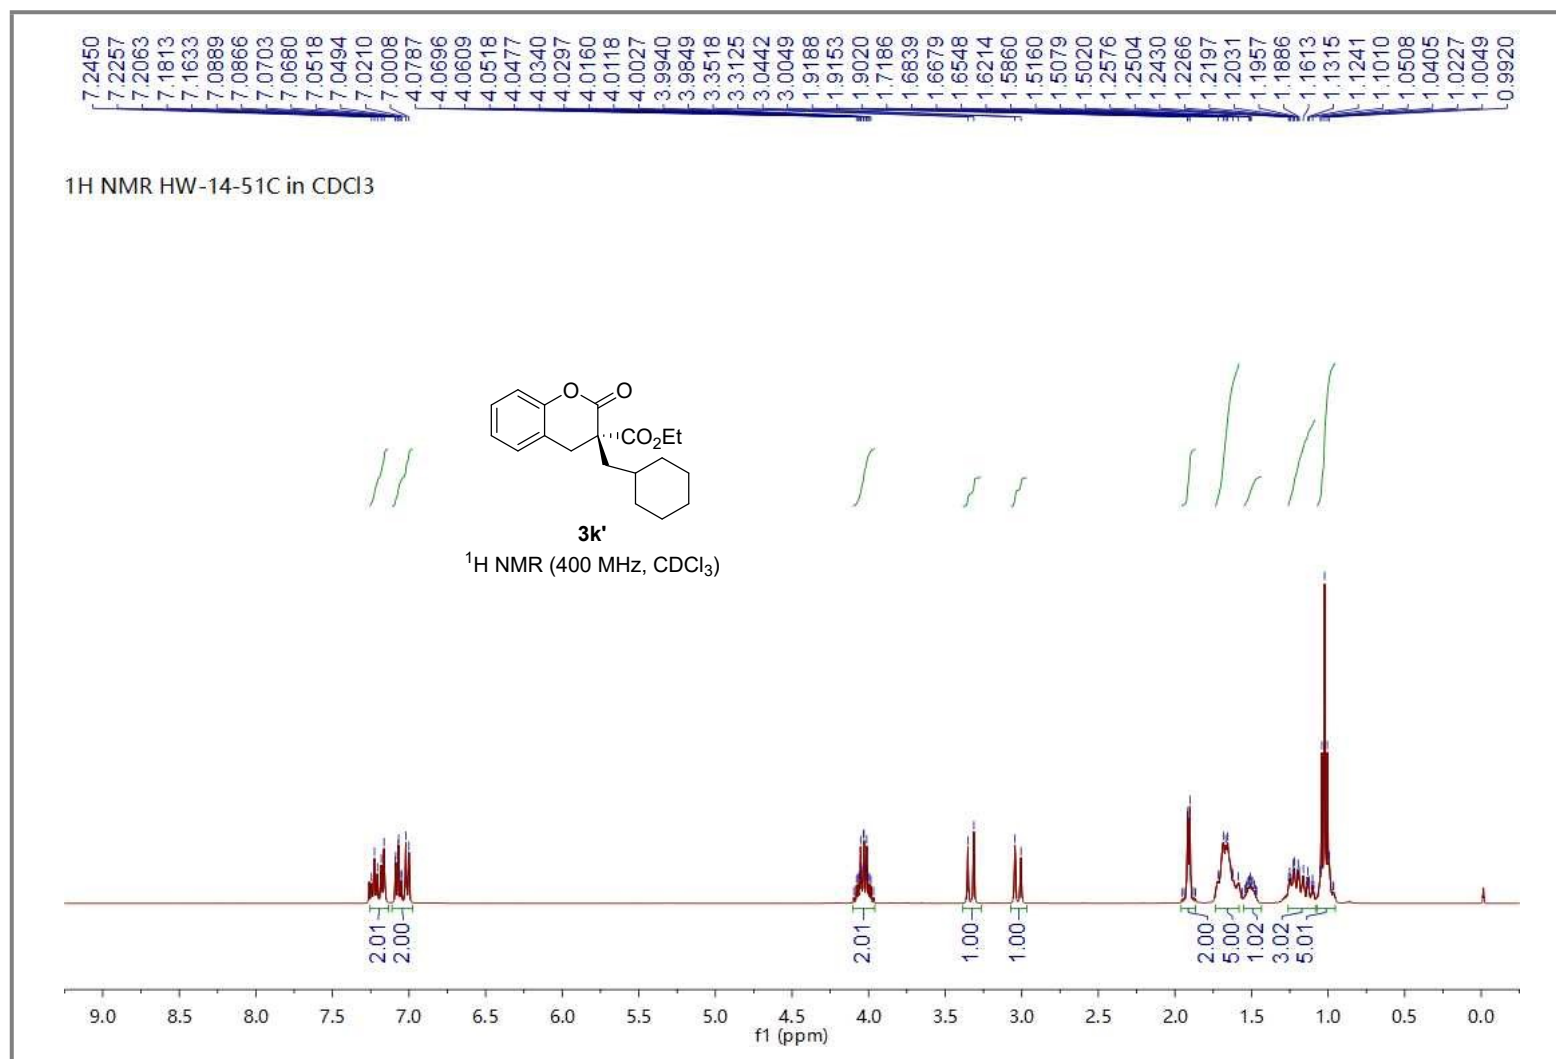

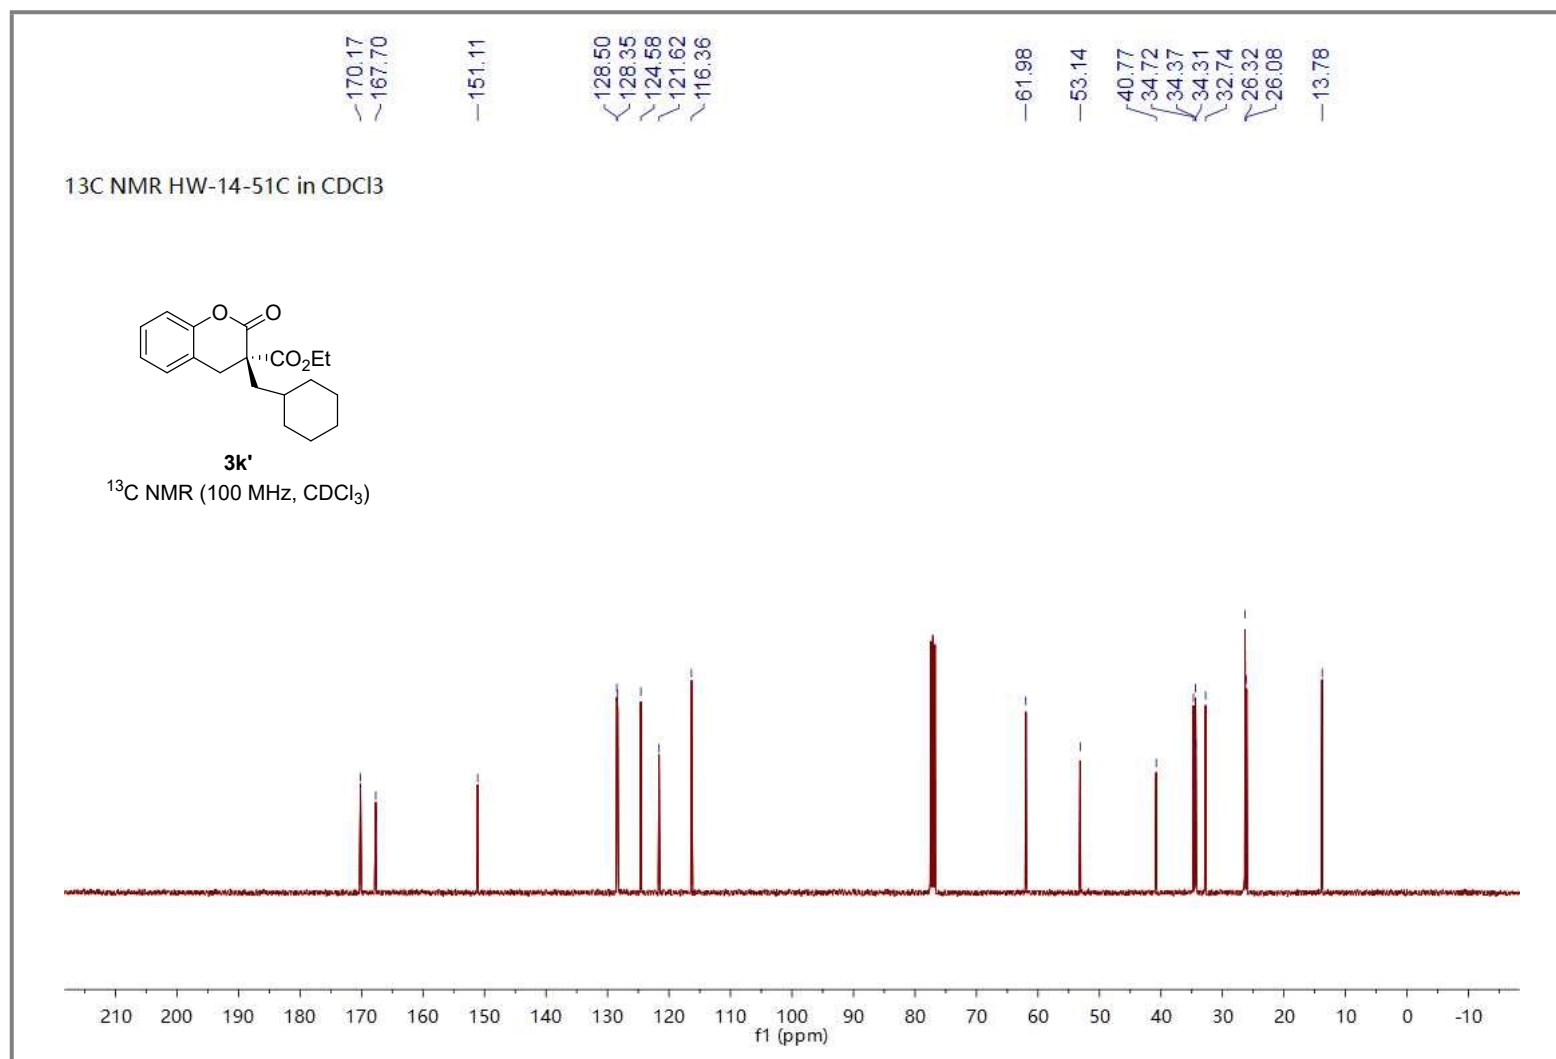



Data File C:\CHEM32\1\DATA\ZHOU-23\YZN023146.D  
Sample Name: HW-14-56B SM+/-

=====  
Acq. Operator :  
Acq. Instrument : Instrument 1 Location : -  
Injection Date : 5/21/2023 1:46:25 AM  
Acq. Method : C:\CHEM32\1\METHODS\DEF\_LC.M  
Last changed : 5/21/2023 1:37:19 AM  
(modified after loading)  
Analysis Method : C:\CHEM32\1\METHODS\DEF\_LC.M  
Last changed : 10/17/2023 9:44:31 AM  
Sample Info : 0D-H, Hexane/i-PrOH = 90/10, 0.8 mL/min, 30 oC, 230 nm

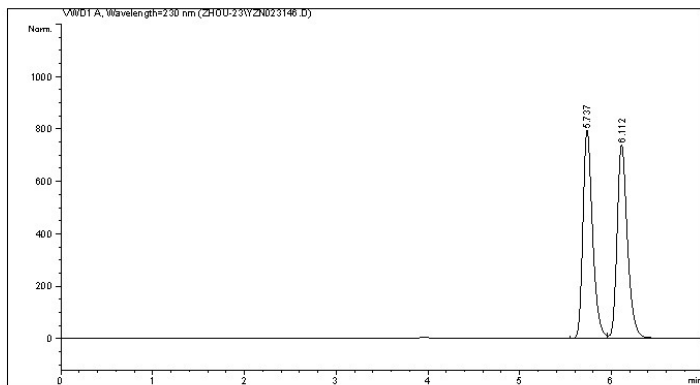

=====  
Area Percent Report  
=====

Sorted By : Signal  
Multiplier: : 1.0000  
Dilution: : 1.0000  
Use Multiplier & Dilution Factor with ISTDs

Signal 1: VWD1 A, Wavelength=230 nm

| Peak # | RetTime [min] | Type | Width [min] | Area mAU   | Height %s | Area [mAU] | Area % |
|--------|---------------|------|-------------|------------|-----------|------------|--------|
| 1      | 5.737         | VV   | 0.1148      | 5801.85840 | 789.97021 | 49.8961    |        |
| 2      | 6.112         | VV   | 0.1271      | 5826.03174 | 737.68420 | 50.1039    |        |

Totals : 1.16279e4 1527.65442

=====  
\*\*\* End of Report \*\*\*

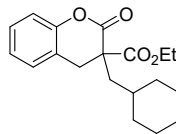

(+/-)-3k

Data File C:\CHEM32\1\DATA\ZHOU-23\YZN023218.D  
Sample Name: HW-14-73C SM

=====  
Acq. Operator :  
Acq. Instrument : Instrument 1 Location : -  
Injection Date : 5/30/2023 9:35:19 AM  
Acq. Method : C:\CHEM32\1\METHODS\DEF\_LC.M  
Last changed : 5/30/2023 9:35:01 AM  
(modified after loading)  
Analysis Method : C:\CHEM32\1\METHODS\DEF\_LC.M  
Last changed : 10/17/2023 9:45:28 AM  
Sample Info : 0D-H, Hexane/i-PrOH = 90/10, 0.8 mL/min, 30 oC, 230 nm

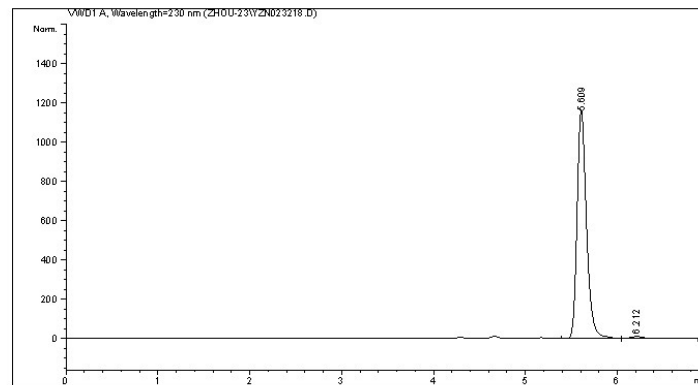

=====  
Area Percent Report  
=====

Sorted By : Signal  
Multiplier: : 1.0000  
Dilution: : 1.0000  
Use Multiplier & Dilution Factor with ISTDs

Signal 1: VWD1 A, Wavelength=230 nm

| Peak # | RetTime [min] | Type | Width [min] | Area mAU   | Height %s  | Area [mAU] | Area % |
|--------|---------------|------|-------------|------------|------------|------------|--------|
| 1      | 5.609         | VV   | 0.1078      | 8286.52246 | 1143.56421 | 98.4766    |        |
| 2      | 6.212         | VV   | 0.1696      | 128.19243  | 11.10791   | 1.5234     |        |

Totals : 8414.71489 1154.67212

=====  
\*\*\* End of Report \*\*\*

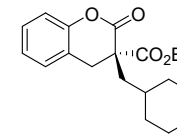

(+)-3k'

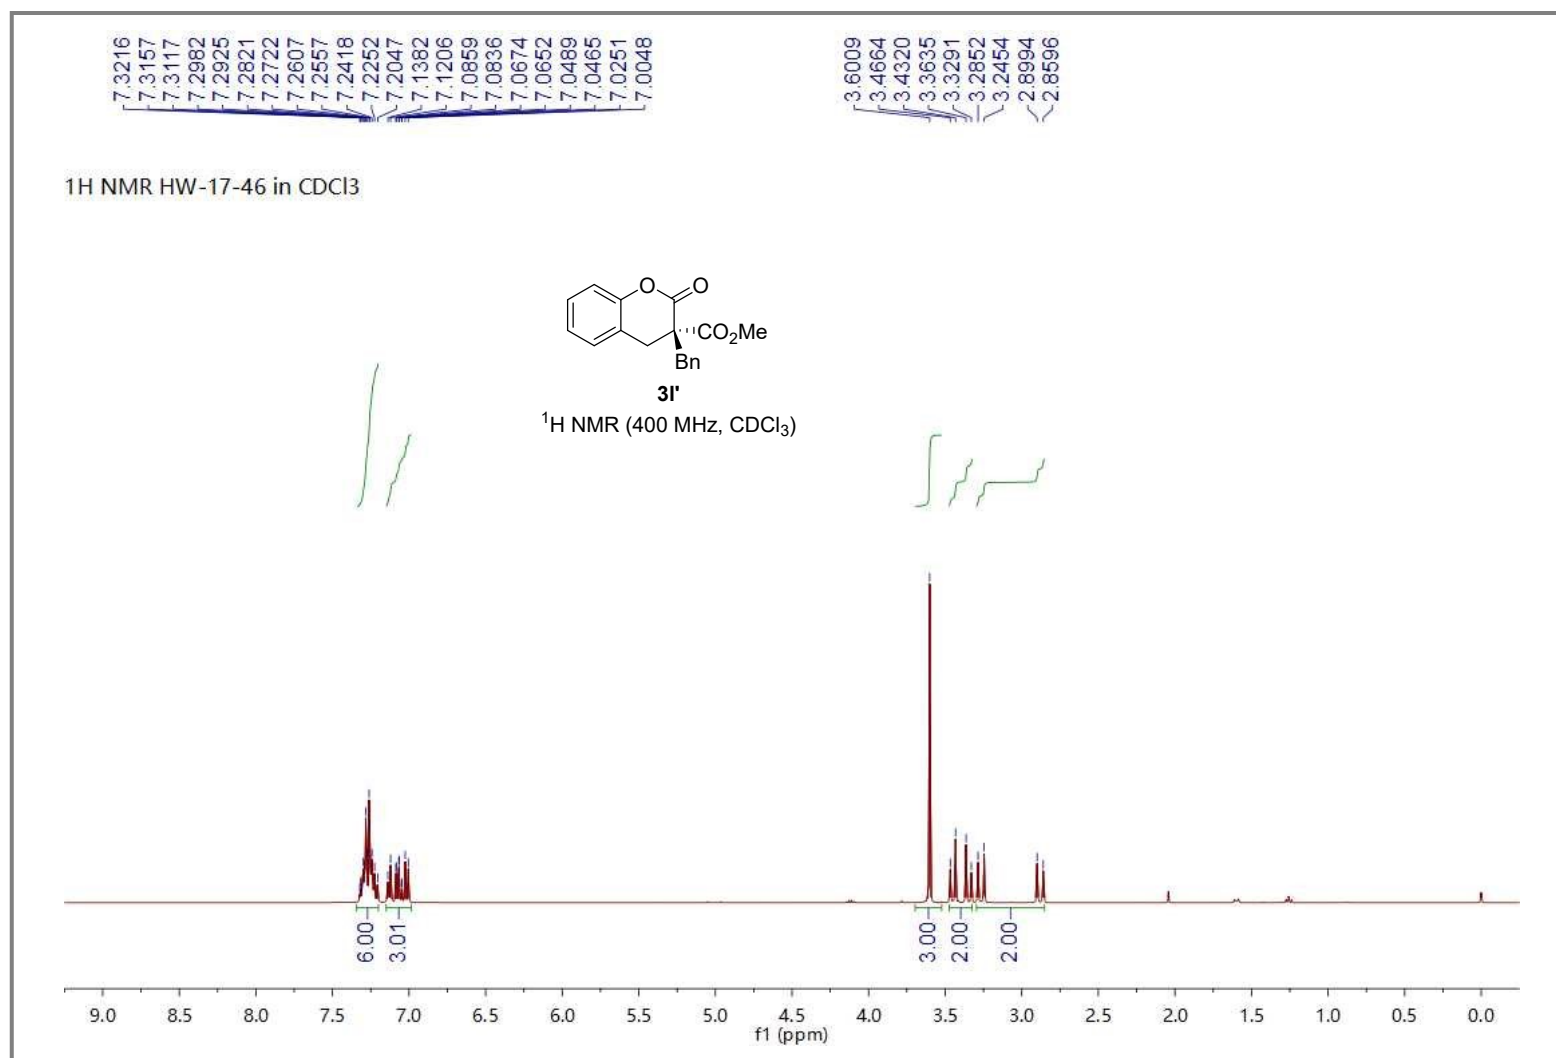

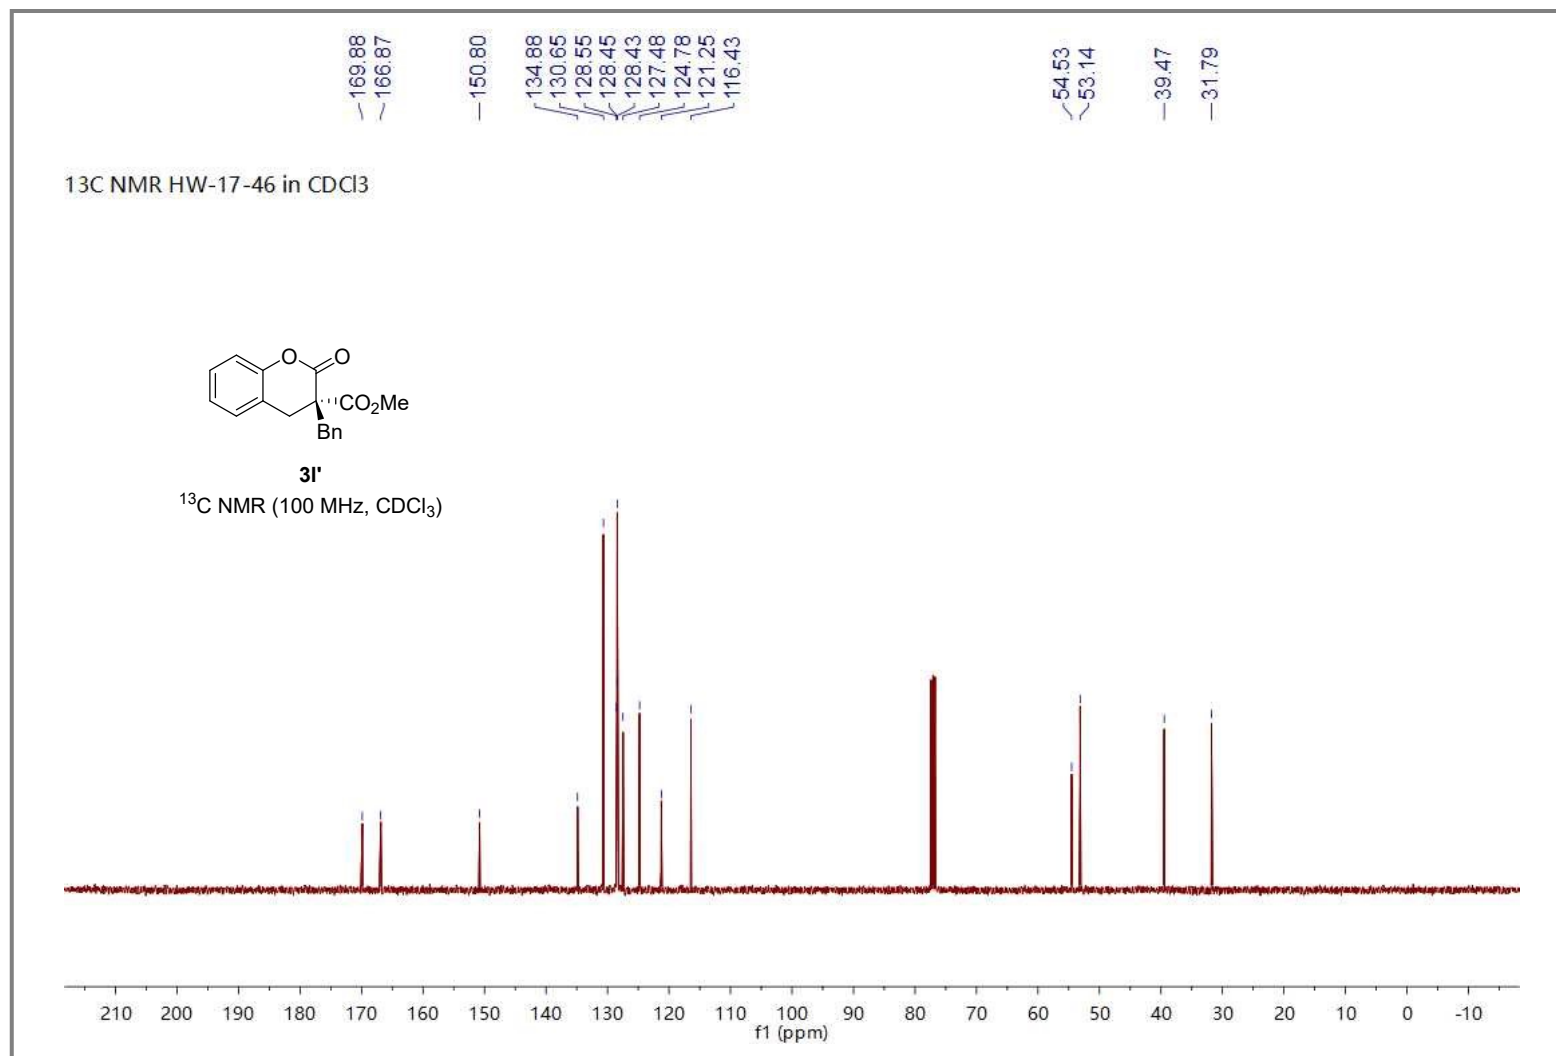

Data File D:\USERS\CHEMSTATION\1\DATA\ZHOU2024\YZ3009332 14-49-04.D  
Sample Name: HW-17-48SM+/-

=====  
Acq. Operator : SYSTEM  
Sample Operator : SYSTEM  
Acq. Instrument : 1260II Location : -  
Injection Date : 4/27/2024 2:49:04 PM Inj : 1  
Inj Volume : No inj  
Acq. Method : C:\Users\Public\Documents\ChemStation\1\Methods\def\_LC.M  
Last changed : 4/27/2024 2:41:24 PM by SYSTEM  
(modified after loading)  
Analysis Method : C:\Users\Public\Documents\ChemStation\1\Methods\def\_LC.M  
Last changed : 4/27/2024 3:47:20 PM by SYSTEM  
(modified after loading)  
Sample Info : AS-H, n-Hexane/i-PrOH = 90/10, 0.8 mL/min, 30 oC, 230 nm

Additional Info : Peak(s) manually integrated

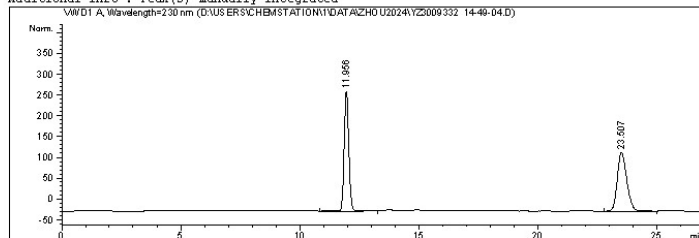

=====  
Area Percent Report  
=====

Sorted By : Signal  
Multiplier : 1.0000  
Dilution : 1.0000  
Do not use Multiplier & Dilution Factor with ISTDs

Signal 1: VWD1 A, Wavelength=230 nm

| Peak # | RetTime [min] | Type | Width [min] | Area [mAU*s] | Height [mAU] | Area %  |
|--------|---------------|------|-------------|--------------|--------------|---------|
| 1      | 11.956        | VB R | 0.2089      | 3111.81250   | 229.70885    | 50.1791 |
| 2      | 23.507        | BV   | 0.4288      | 3089.59863   | 112.37350    | 49.8209 |

Totals : 6201.41113 342.08234

=====  
\*\*\* End of Report \*\*\*

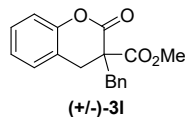

Data File D:\USERS\CHEMSTATION\1\DATA\ZHOU2024\YZ3009333 15-20-32.D  
Sample Name: HW-17-48SM

=====  
Acq. Operator : SYSTEM  
Sample Operator : SYSTEM  
Acq. Instrument : 1260II Location : -  
Injection Date : 4/27/2024 3:20:32 PM Inj : 1  
Inj Volume : No inj  
Acq. Method : C:\Users\Public\Documents\ChemStation\1\Methods\def\_LC.M  
Last changed : 4/27/2024 2:41:24 PM by SYSTEM  
(modified after loading)  
Analysis Method : C:\Users\Public\Documents\ChemStation\1\Methods\def\_LC.M  
Last changed : 4/27/2024 3:49:04 PM by SYSTEM  
(modified after loading)  
Sample Info : AS-H, n-Hexane/i-PrOH = 90/10, 0.8 mL/min, 30 oC, 230 nm

Additional Info : Peak(s) manually integrated

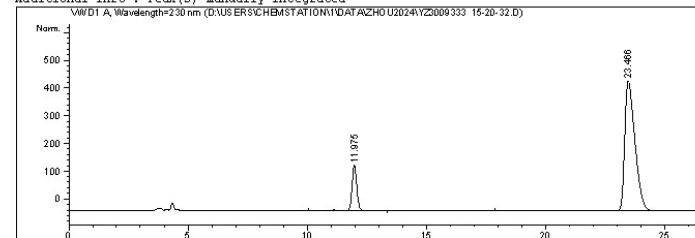

=====  
Area Percent Report  
=====

Sorted By : Signal  
Multiplier : 1.0000  
Dilution : 1.0000  
Do not use Multiplier & Dilution Factor with ISTDs

Signal 1: VWD1 A, Wavelength=230 nm

| Peak # | RetTime [min] | Type | Width [min] | Area [mAU*s] | Height [mAU] | Area %  |
|--------|---------------|------|-------------|--------------|--------------|---------|
| 1      | 11.975        | VV R | 0.2160      | 1858.51172   | 133.44449    | 14.0102 |
| 2      | 23.466        | VV R | 0.4520      | 1.14069e4    | 382.56509    | 85.9898 |

Totals : 1.32655e4 516.00958

=====  
\*\*\* End of Report \*\*\*

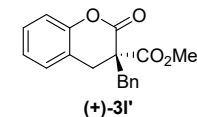

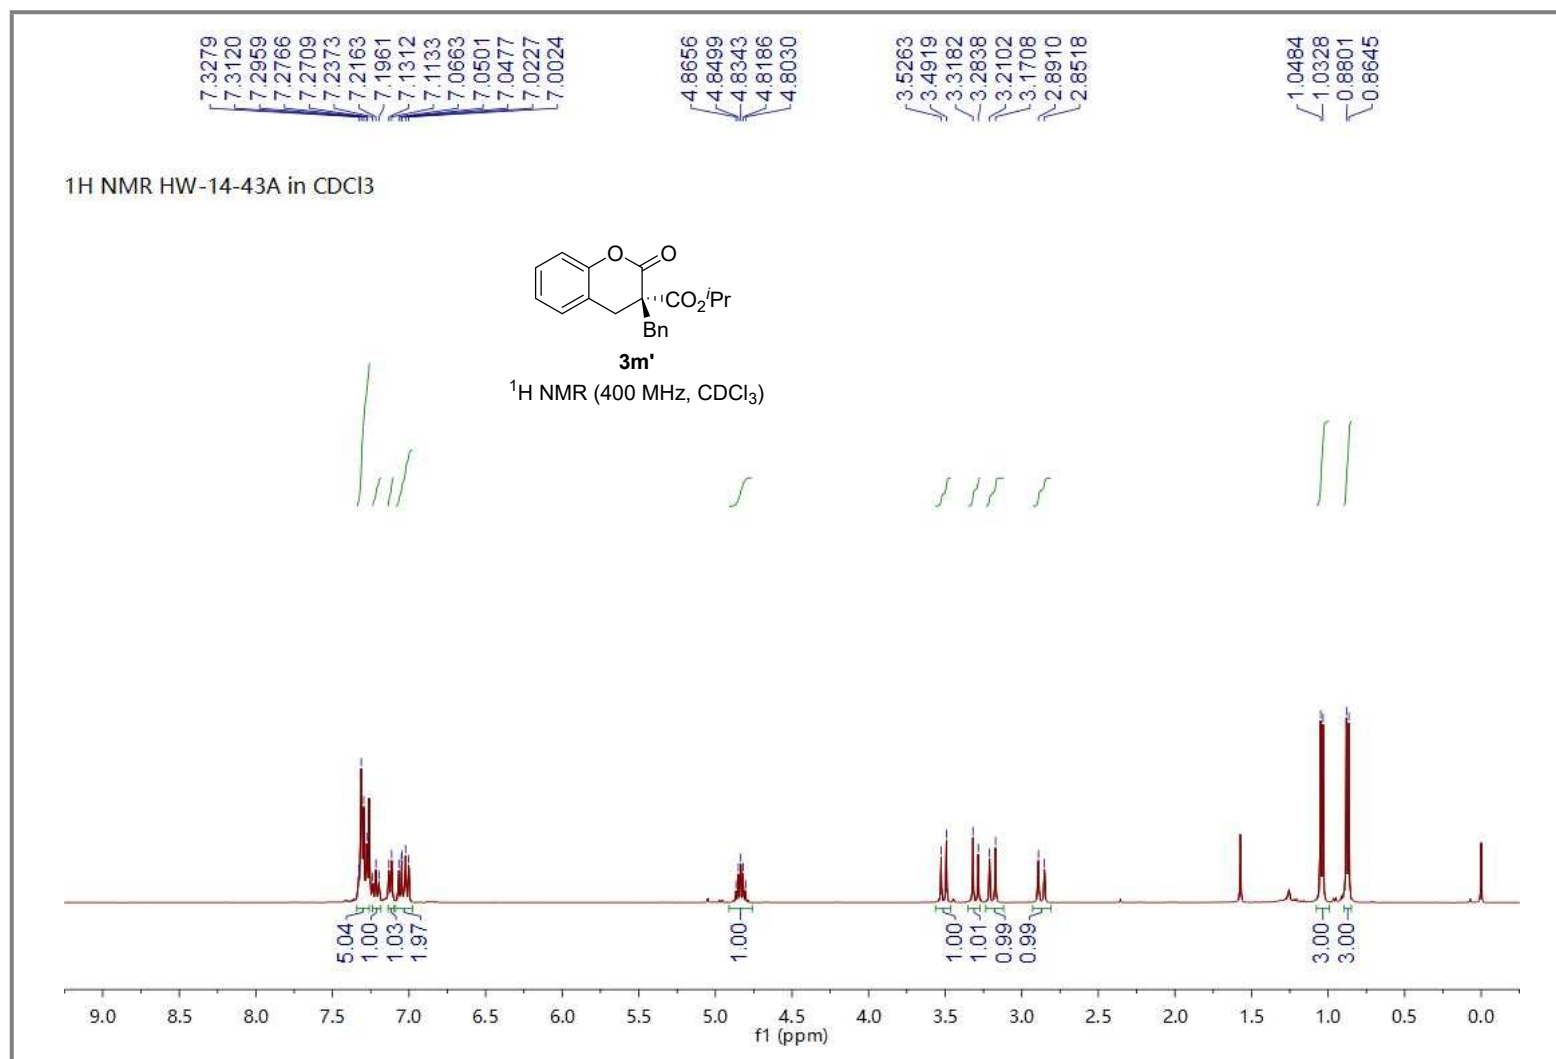

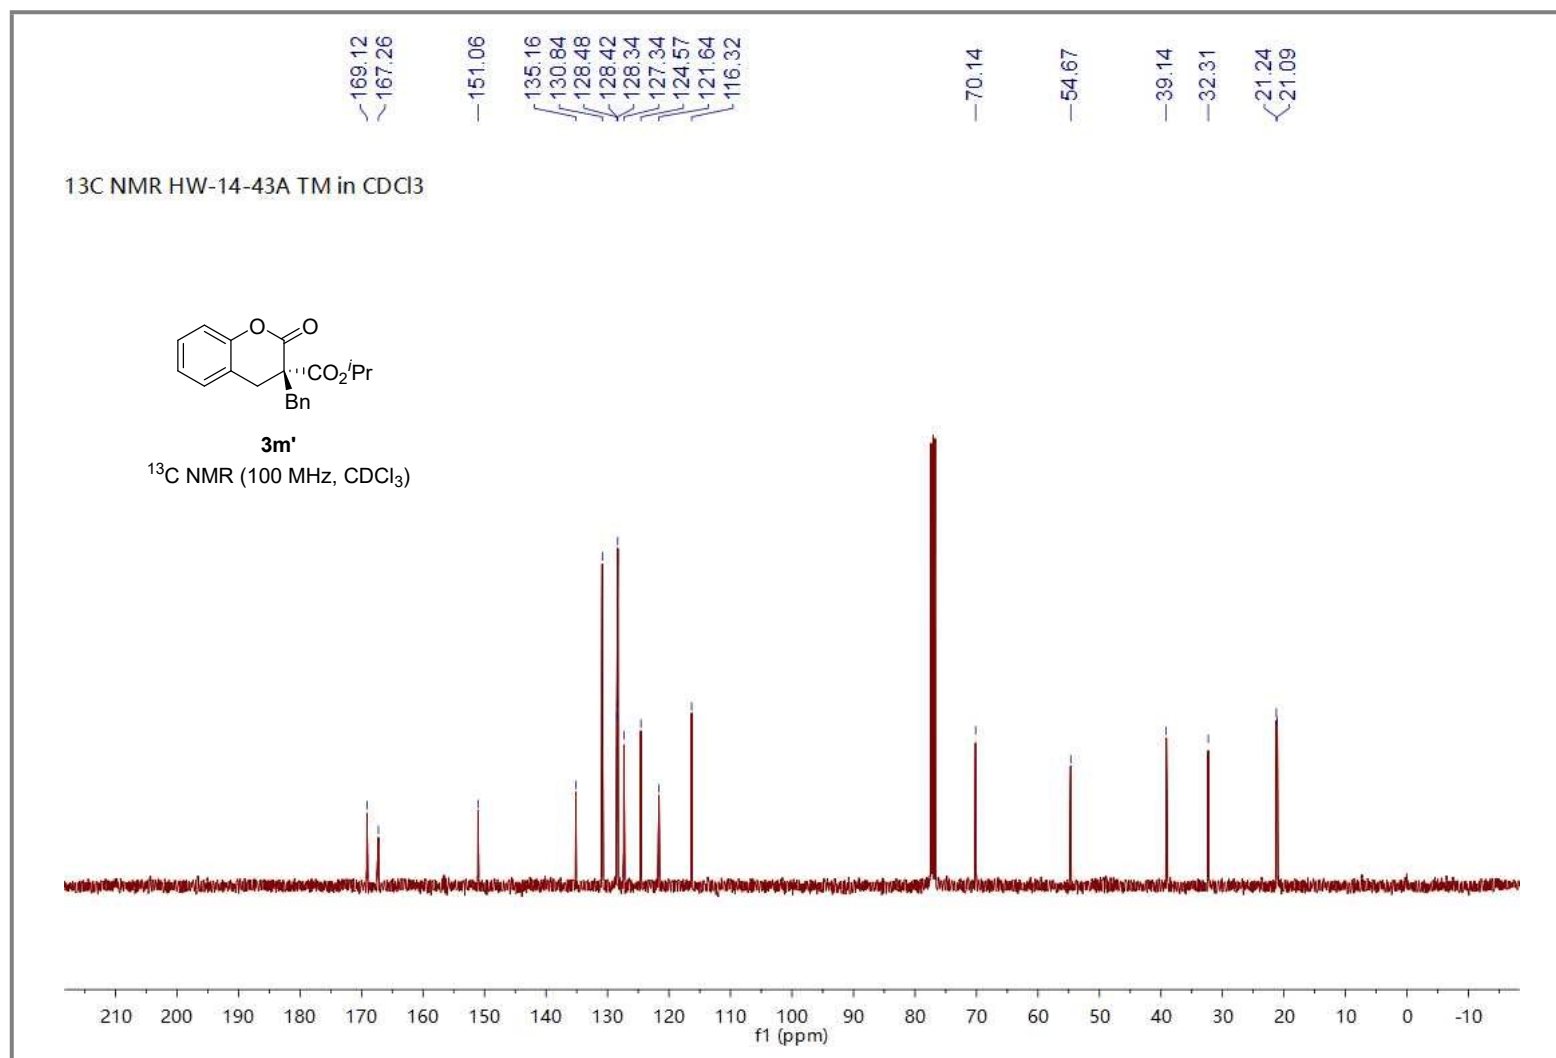

Data File C:\CHEM32\1\DATA\ZHOU-23\YZN023011.D  
 Sample Name: HW-14-48A SM+/-

=====  
 Acq. Operator :  
 Acq. Instrument : Instrument 1 Location : -  
 Injection Date : 5/5/2023 4:56:07 AM  
 Acq. Method : C:\CHEM32\1\METHODS\DEF\_LC.M  
 Last changed : 5/5/2023 4:55:47 AM  
 (modified after loading)  
 Analysis Method : C:\CHEM32\1\METHODS\DEF\_LC.M  
 Last changed : 10/17/2023 9:49:24 AM  
 (modified after loading)  
 Sample Info : AS-H, Hexane/i-PrOH = 90/10, 0.8 mL/min, 30 oC, 230nm

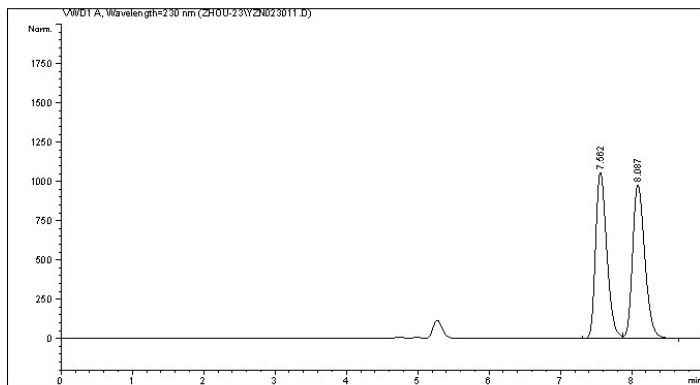

=====  
 Area Percent Report  
 =====

Sorted By : Signal  
 Multiplier: : 1.0000  
 Dilution: : 1.0000  
 Use Multiplier & Dilution Factor with ISTDs

Signal 1: VWD1 A, Wavelength=230 nm

| Peak # | RetTime [min] | Type | Width [min] | Area mAU  | Height %s  | Area [mAU] | Area % |
|--------|---------------|------|-------------|-----------|------------|------------|--------|
| 1      | 7.562         | VV   | 0.1686      | 1.15752e4 | 1056.39905 | 49.6820    |        |
| 2      | 8.087         | VV   | 0.1863      | 1.17234e4 | 978.81940  | 50.3180    |        |

Totals : 2.32986e4 2035.21844

=====  
 \*\*\* End of Report \*\*\*

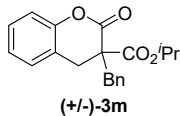

Data File C:\CHEM32\1\DATA\ZHOU-23\YZN023009.D  
 Sample Name: HW-14-48A SM

=====  
 Acq. Operator :  
 Acq. Instrument : Instrument 1 Location : -  
 Injection Date : 5/5/2023 4:23:58 AM  
 Acq. Method : C:\CHEM32\1\METHODS\DEF\_LC.M  
 Last changed : 5/5/2023 4:23:20 AM  
 (modified after loading)  
 Analysis Method : C:\CHEM32\1\METHODS\DEF\_LC.M  
 Last changed : 10/17/2023 9:48:45 AM  
 (modified after loading)  
 Sample Info : AS-H, Hexane/i-PrOH = 90/10, 0.8 mL/min, 30 oC, 230nm

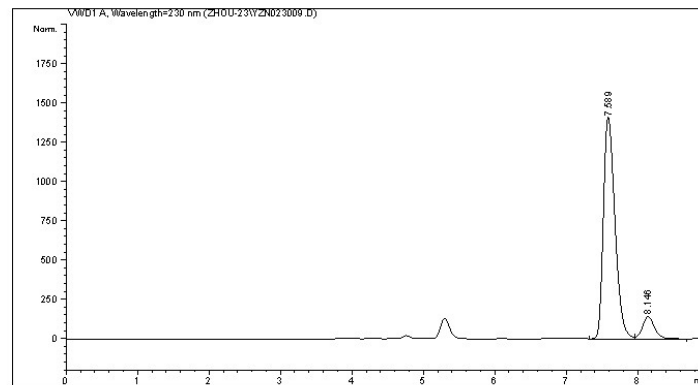

=====  
 Area Percent Report  
 =====

Sorted By : Signal  
 Multiplier: : 1.0000  
 Dilution: : 1.0000  
 Use Multiplier & Dilution Factor with ISTDs

Signal 1: VWD1 A, Wavelength=230 nm

| Peak # | RetTime [min] | Type | Width [min] | Area mAU    | Height %s  | Area [mAU] | Area % |
|--------|---------------|------|-------------|-------------|------------|------------|--------|
| 1      | 7.589         | VV   | 0.1784      | 1.58565e4   | 1403.31604 | 90.3405    |        |
| 2      | 8.146         | VV   | 0.1865      | 1.695.42773 | 141.34738  | 9.6595     |        |

Totals : 1.75519e4 1544.66342

=====  
 \*\*\* End of Report \*\*\*

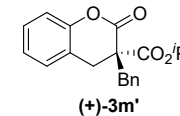

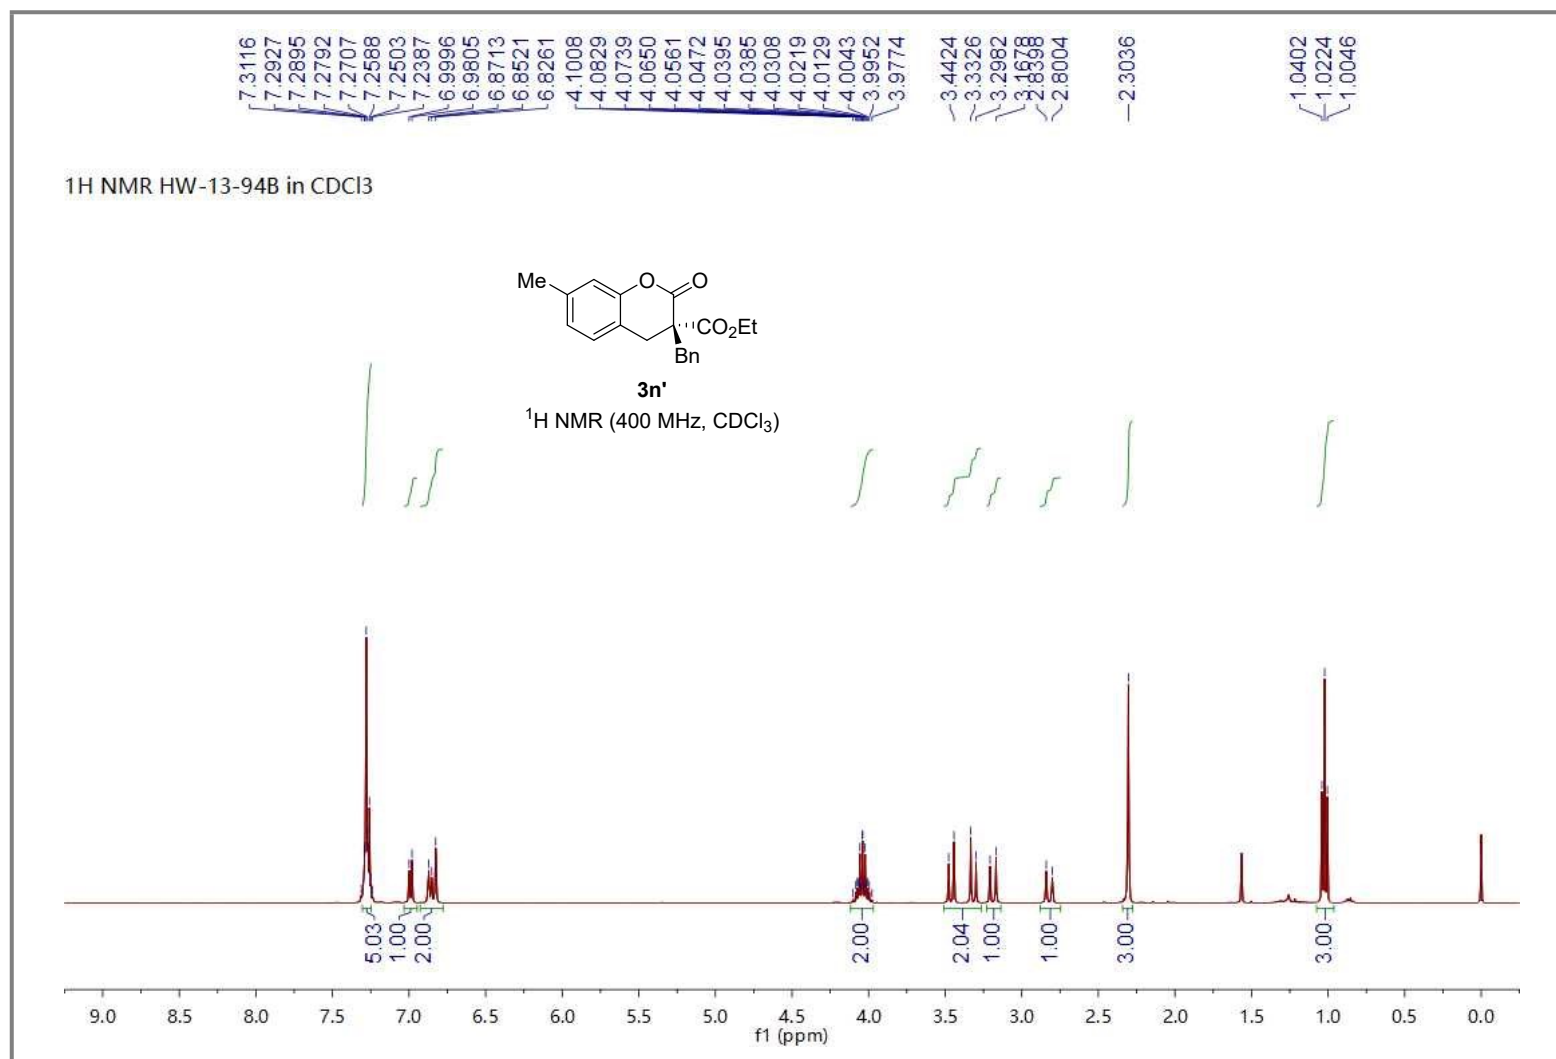



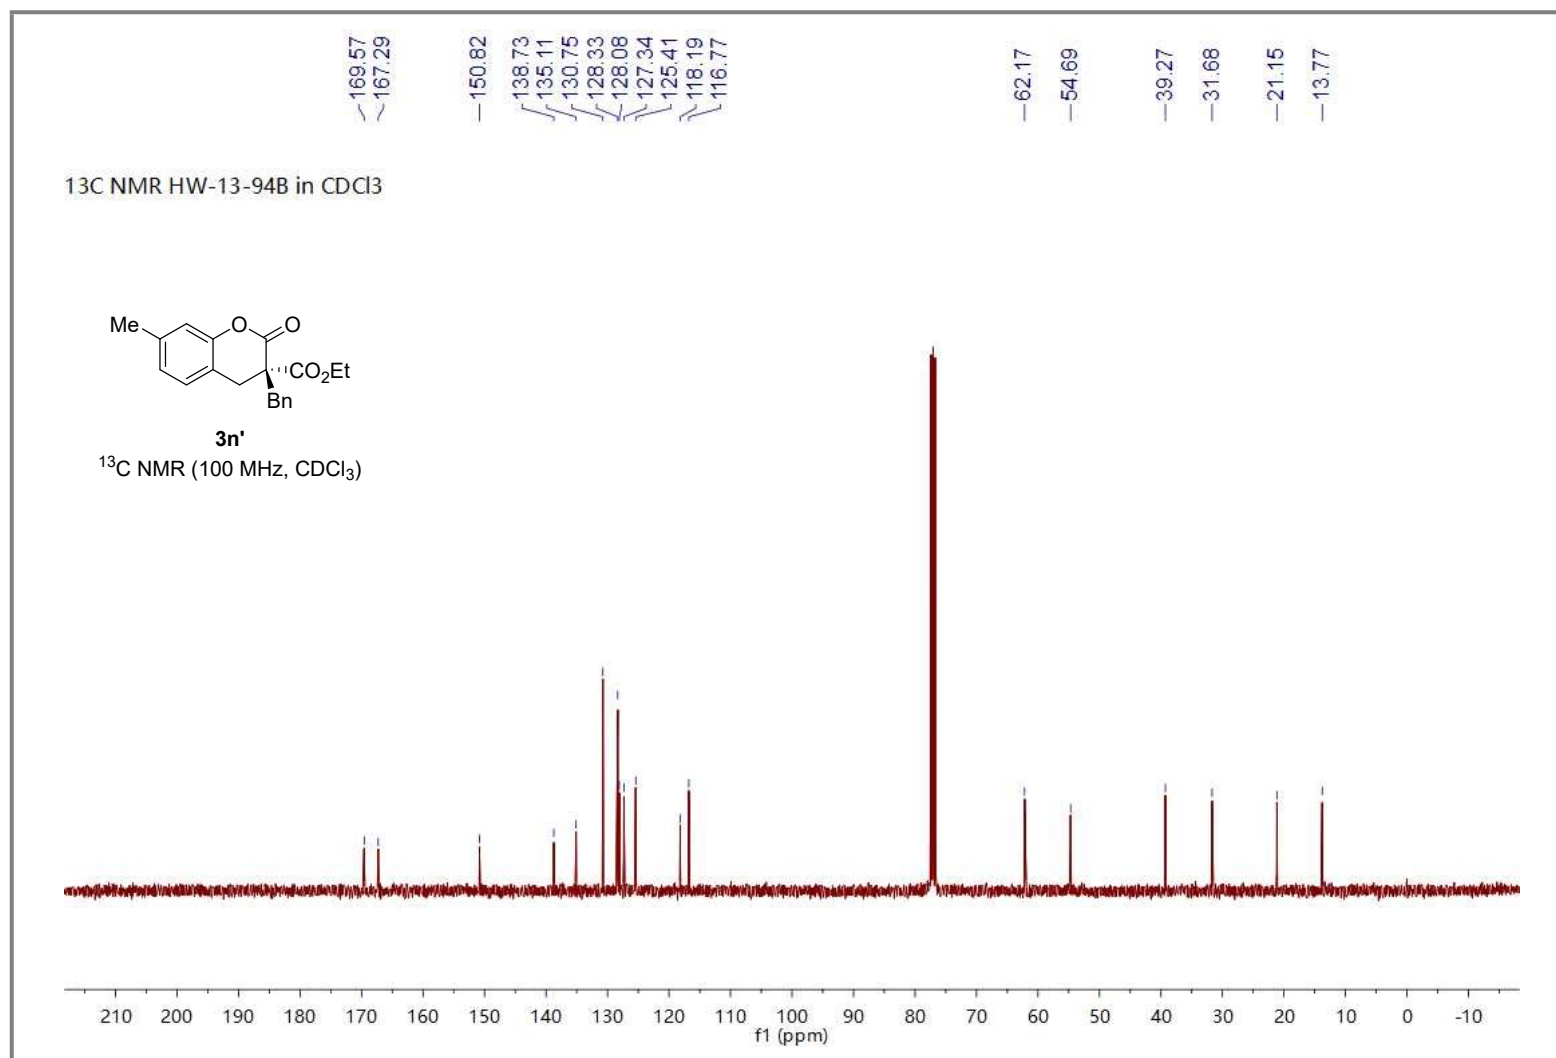

Data File C:\USERS\PUBLIC\DOCUMENTS\CHEMSTATION\1\DATA\2023\YZH005554 14-43-18.D  
 Sample Name: HW-13-94E+/-

=====  
 Acq. Operator : SYSTEM  
 Sample Operator : SYSTEM  
 Acq. Instrument : HPLC1260 II Location : 1  
 Injection Date : 11/28/2023 2:43:18 PM Inj : 1  
 Inj Volume : No inj  
 Acq. Method : C:\USERS\PUBLIC\DOCUMENTS\CHEMSTATION\1\METHODS\def\_LC1.M  
 Last changed : 11/28/2023 2:29:47 PM by SYSTEM  
 (modified after loading)  
 Analysis Method : C:\USERS\PUBLIC\DOCUMENTS\CHEMSTATION\1\METHODS\def\_LC1.M  
 Last changed : 11/29/2023 11:00:00 AM by SYSTEM  
 (modified after loading)  
 Sample Info : IB, Hexane/i-PrOH = 97/3, 0.8 mL/min, 30 oC, 230 nm

Additional Info : Peak(s) manually integrated

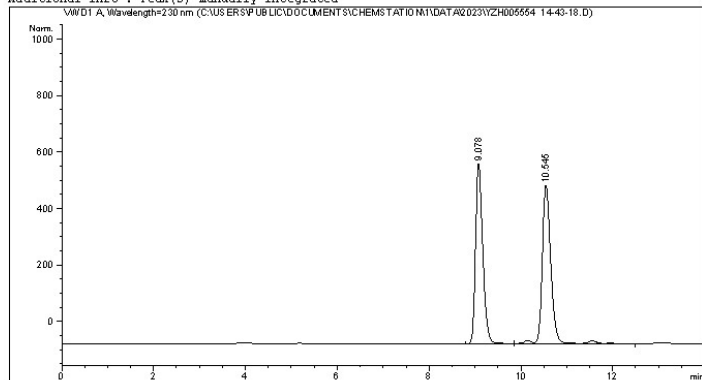

=====  
 Area Percent Report  
 =====

Sorted By : Signal  
 Multiplier : 1.0000  
 Dilution : 1.0000  
 Sample Amount : 1.00000 [ng/ul] (not used in calc.)  
 Do not use Multiplier & Dilution Factor with ISTDs

Signal 1: VWD1 A, Wavelength=230 nm

| Peak # | RetTime [min] | Type | Width [min] | Area [mAU*s] | Height [mAU] | Area %  |
|--------|---------------|------|-------------|--------------|--------------|---------|
| 1      | 9.078         | BB   | 0.1677      | 5274.76465   | 481.92596    | 48.8818 |
| 2      | 10.545        | VV R | 0.1919      | 5516.08203   | 423.66296    | 51.1182 |

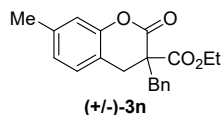

Data File C:\USERS\PUBLIC\DOCUMENTS\CHEMSTATION\1\DATA\2023\YZH005555 14-59-36.D  
 Sample Name: HW-14-12B SM'

=====  
 Acq. Operator : SYSTEM  
 Sample Operator : SYSTEM  
 Acq. Instrument : HPLC1260 II Location : 1  
 Injection Date : 11/28/2023 2:59:36 PM Inj : 1  
 Inj Volume : No inj  
 Acq. Method : C:\USERS\PUBLIC\DOCUMENTS\CHEMSTATION\1\METHODS\def\_LC1.M  
 Last changed : 11/28/2023 2:29:47 PM by SYSTEM  
 (modified after loading)  
 Analysis Method : C:\USERS\PUBLIC\DOCUMENTS\CHEMSTATION\1\METHODS\def\_LC1.M  
 Last changed : 11/29/2023 11:01:10 AM by SYSTEM  
 (modified after loading)  
 Sample Info : IB, Hexane/i-PrOH = 97/3, 0.8 mL/min, 30 oC, 230 nm

Additional Info : Peak(s) manually integrated

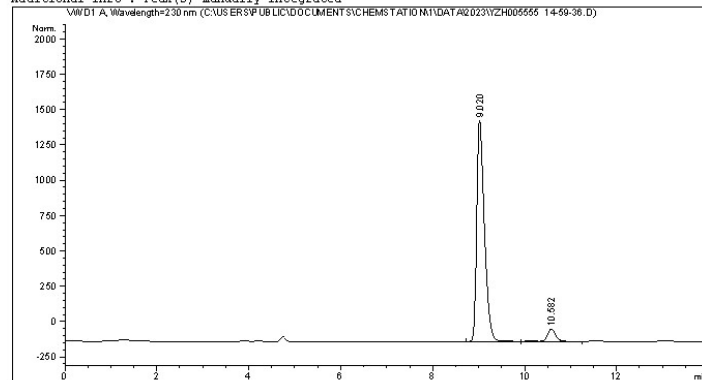

=====  
 Area Percent Report  
 =====

Sorted By : Signal  
 Multiplier : 1.0000  
 Dilution : 1.0000  
 Sample Amount : 1.00000 [ng/ul] (not used in calc.)  
 Do not use Multiplier & Dilution Factor with ISTDs

Signal 1: VWD1 A, Wavelength=230 nm

| Peak # | RetTime [min] | Type | Width [min] | Area [mAU*s] | Height [mAU] | Area %  |
|--------|---------------|------|-------------|--------------|--------------|---------|
| 1      | 9.020         | BB   | 0.1740      | 1.48492e4    | 1282.79663   | 94.0383 |
| 2      | 10.582        | VB R | 0.1873      | 941.38684    | 72.44398     | 5.9617  |

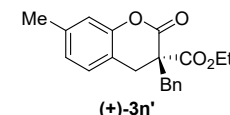

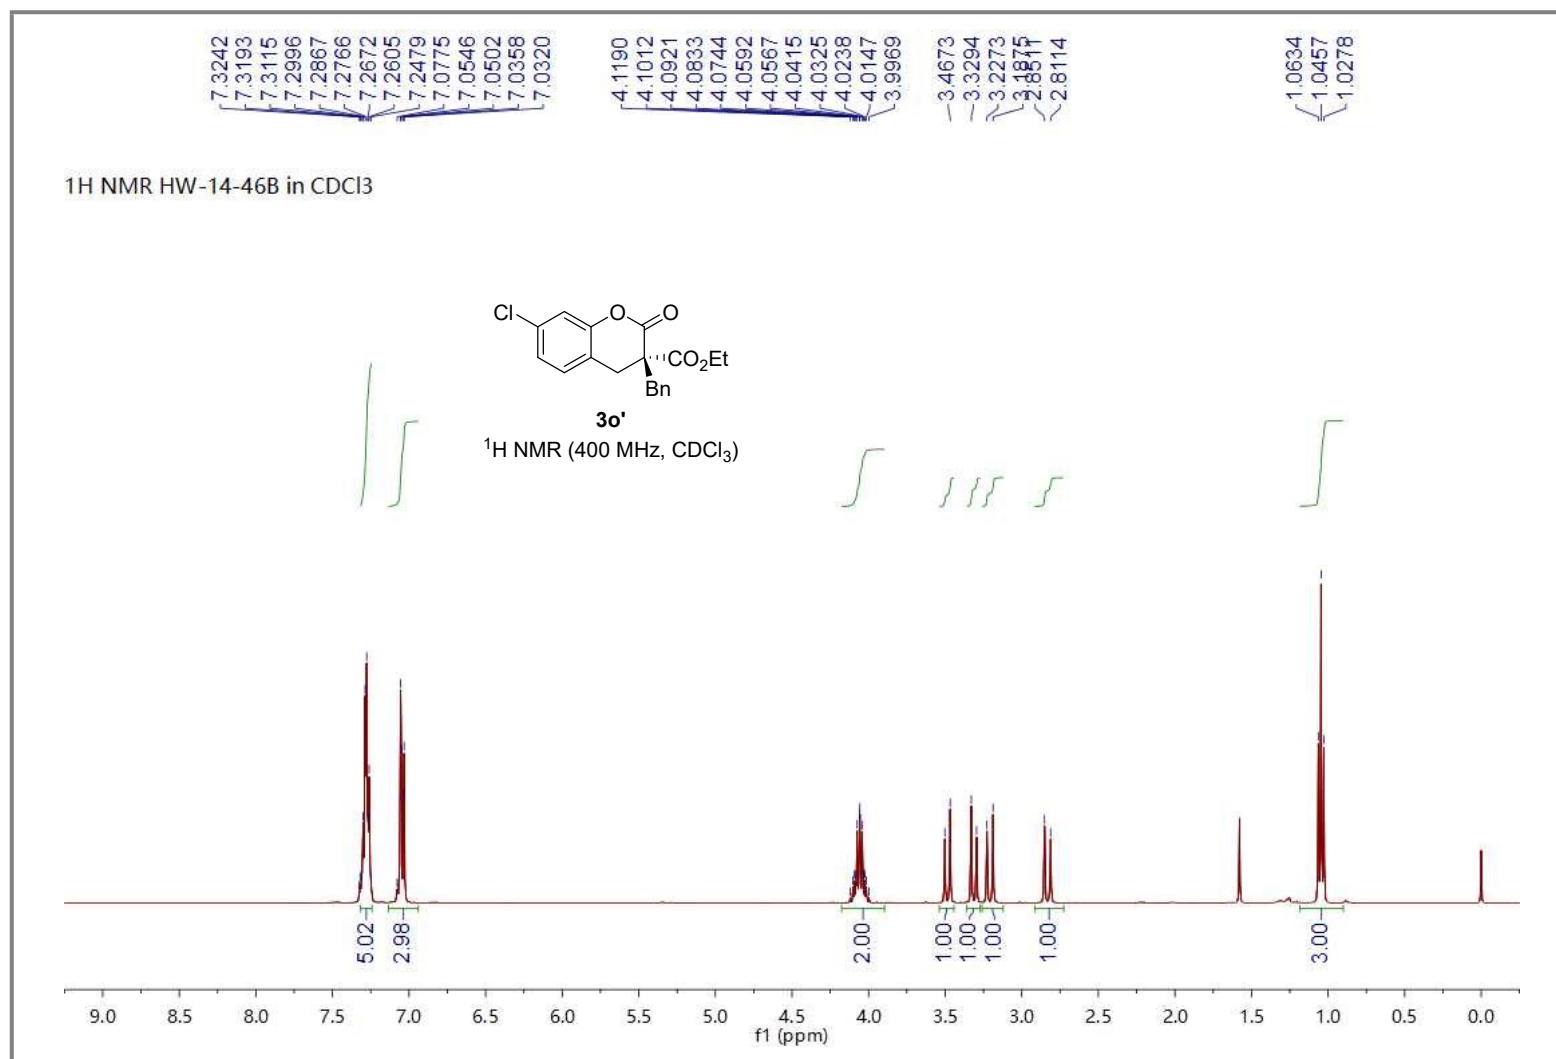

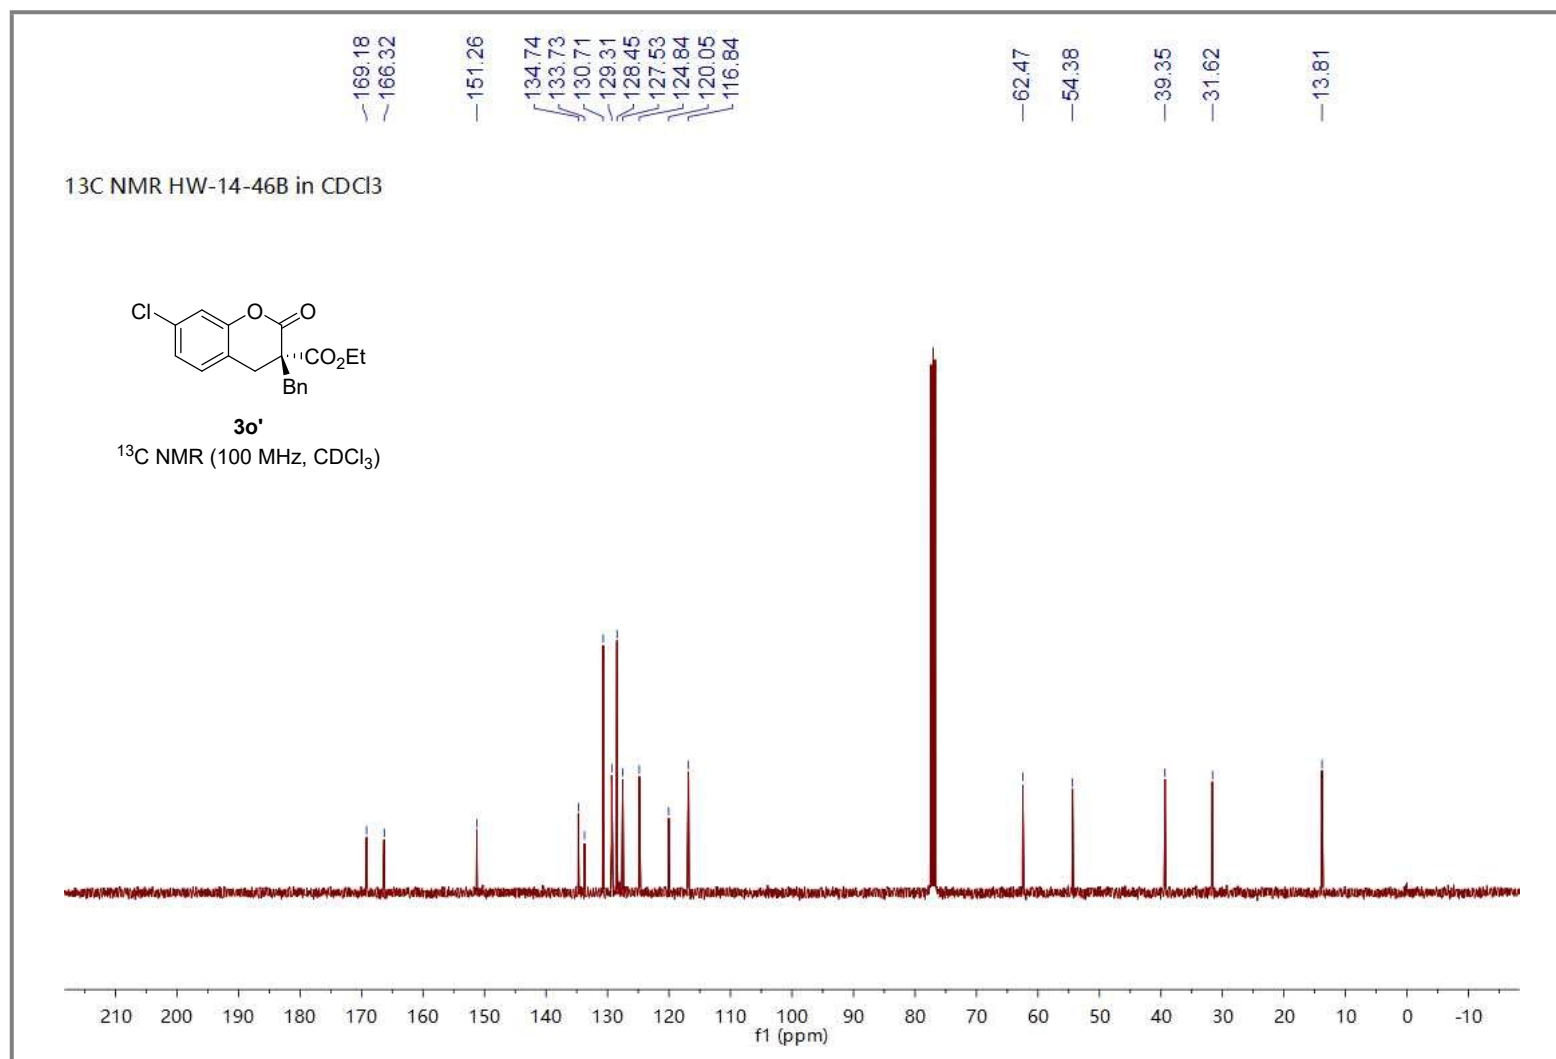

Data File C:\USERS\PUBLIC\DOCUMENTS\CHEMSTATION\1\DATA\2023\YZH004521 16-19-57.D  
 Sample Name: HW-14-92SM +/-

=====  
 Acq. Operator : SYSTEM  
 Sample Operator : SYSTEM  
 Acq. Instrument : HPLC1260 II Location : 1  
 Injection Date : 7/10/2023 4:19:57 PM Inj : 1  
 Inj Volume : No inj  
 Acq. Method : C:\USERS\PUBLIC\DOCUMENTS\CHEMSTATION\1\METHODS\def\_LC1.M  
 Last changed : 7/10/2023 4:05:56 PM by SYSTEM  
 (modified after loading)  
 Analysis Method : C:\USERS\PUBLIC\DOCUMENTS\CHEMSTATION\1\METHODS\def\_LC1.M  
 Last changed : 10/16/2023 10:14:17 PM by SYSTEM  
 (modified after loading)  
 Sample Info : AS-H, Hexane/1-PrOH = 93/7, 0.8 mL/min, 30 oC, 230 nm

Additional Info : Peak(s) manually integrated

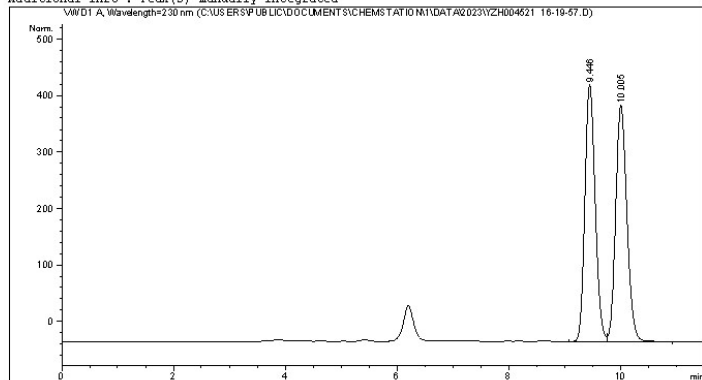

=====  
 Area Percent Report  
 =====

Sorted By : Signal  
 Multiplier : 1.0000  
 Dilution : 1.0000  
 Sample Amount : 1.00000 [ng/ul] (not used in calc.)  
 Do not use Multiplier & Dilution Factor with ISTDs

Signal 1: VWD1 A, Wavelength=230 nm

| Peak # | RetTime [min] | Type | Width [min] | Area [mAU*s] | Height [mAU] | Area %  |
|--------|---------------|------|-------------|--------------|--------------|---------|
| 1      | 9.446         | BV   | 0.1987      | 4970.99463   | 390.02411    | 49.7473 |
| 2      | 10.005        | VB   | 0.2174      | 5021.50635   | 358.63422    | 50.2527 |

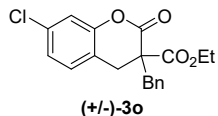

Data File C:\USERS\PUBLIC\DOCUMENTS\CHEMSTATION\1\DATA\2023\YZH004522 16-41-25.D  
 Sample Name: HW-14-92SM

=====  
 Acq. Operator : SYSTEM  
 Sample Operator : SYSTEM  
 Acq. Instrument : HPLC1260 II Location : 1  
 Injection Date : 7/10/2023 4:41:25 PM Inj : 1  
 Inj Volume : No inj  
 Acq. Method : C:\USERS\PUBLIC\DOCUMENTS\CHEMSTATION\1\METHODS\def\_LC1.M  
 Last changed : 7/10/2023 4:05:56 PM by SYSTEM  
 (modified after loading)  
 Analysis Method : C:\USERS\PUBLIC\DOCUMENTS\CHEMSTATION\1\METHODS\def\_LC1.M  
 Last changed : 10/16/2023 10:15:20 PM by SYSTEM  
 (modified after loading)  
 Sample Info : AS-H, Hexane/1-PrOH = 93/7, 0.8 mL/min, 30 oC, 230 nm

Additional Info : Peak(s) manually integrated

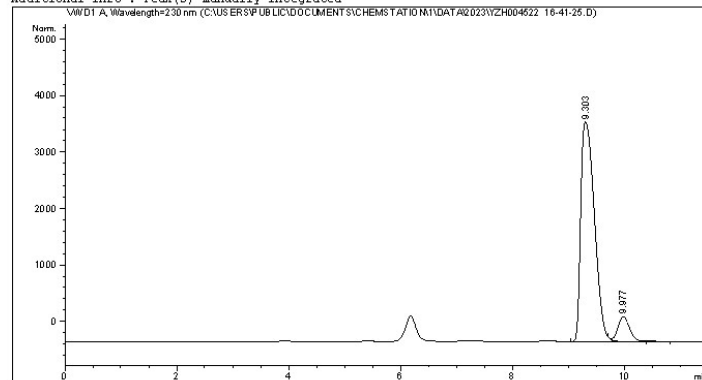

=====  
 Area Percent Report  
 =====

Sorted By : Signal  
 Multiplier : 1.0000  
 Dilution : 1.0000  
 Sample Amount : 1.00000 [ng/ul] (not used in calc.)  
 Do not use Multiplier & Dilution Factor with ISTDs

Signal 1: VWD1 A, Wavelength=230 nm

| Peak # | RetTime [min] | Type | Width [min] | Area [mAU*s] | Height [mAU] | Area %  |
|--------|---------------|------|-------------|--------------|--------------|---------|
| 1      | 9.303         | BV R | 0.2700      | 5.37358e4    | 3178.20581   | 91.0710 |
| 2      | 9.977         | VV E | 0.2255      | 5268.52686   | 362.52792    | 8.9290  |

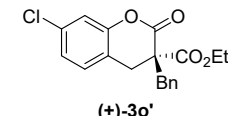

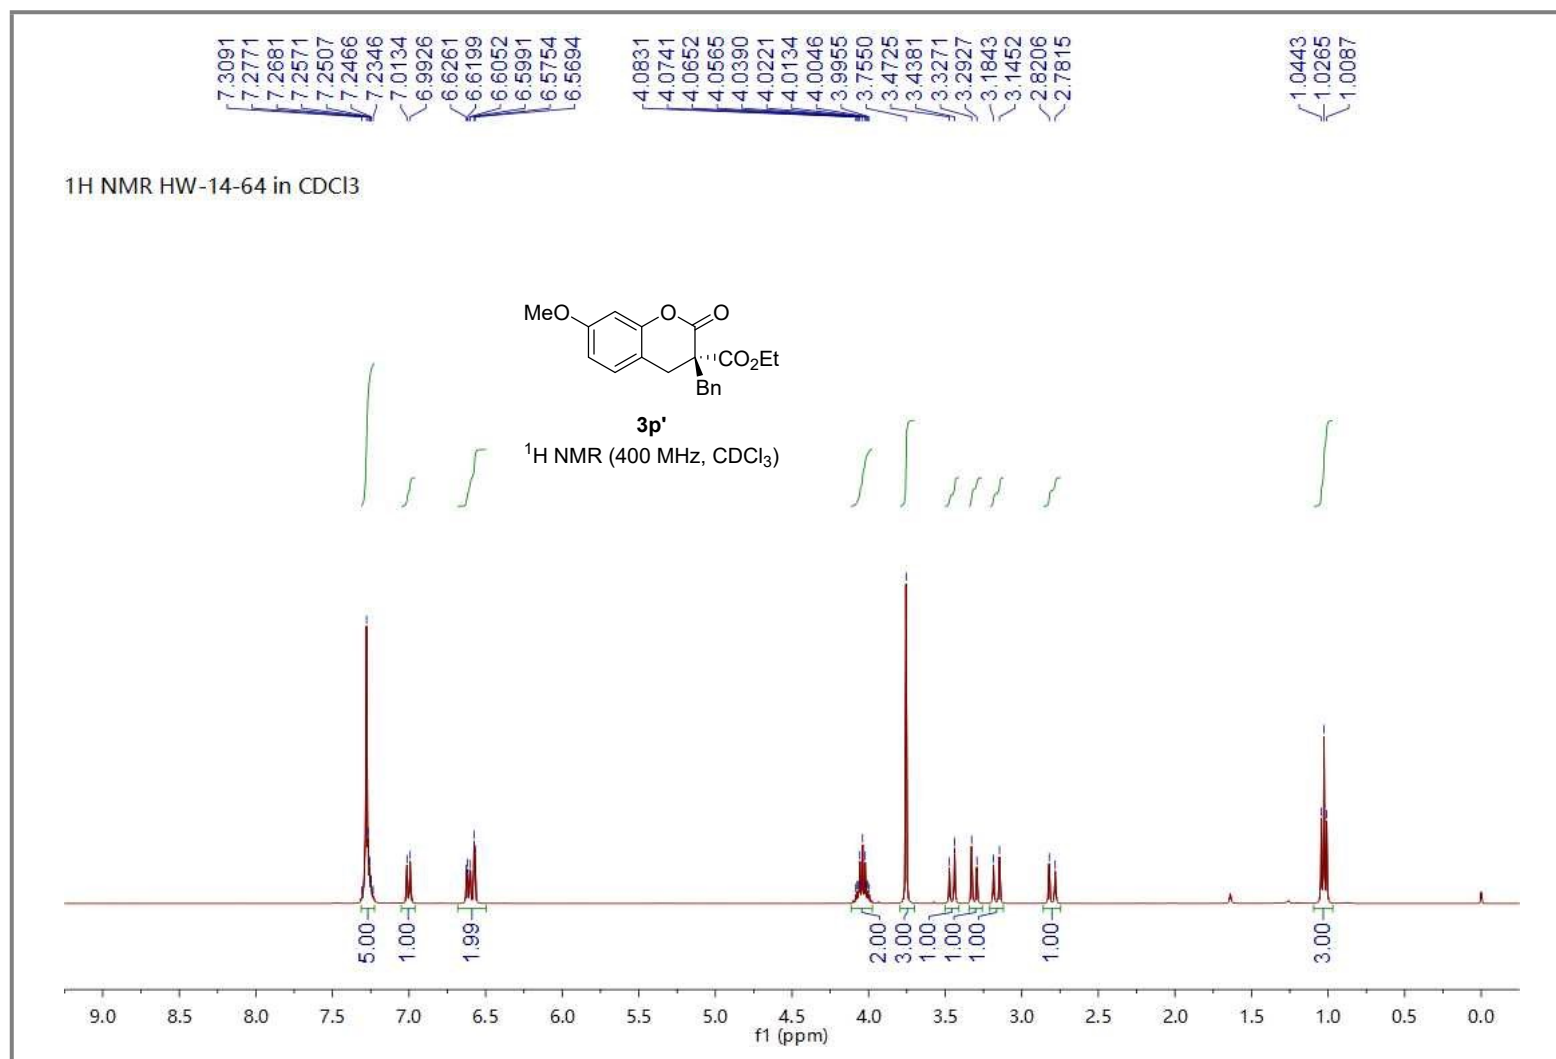

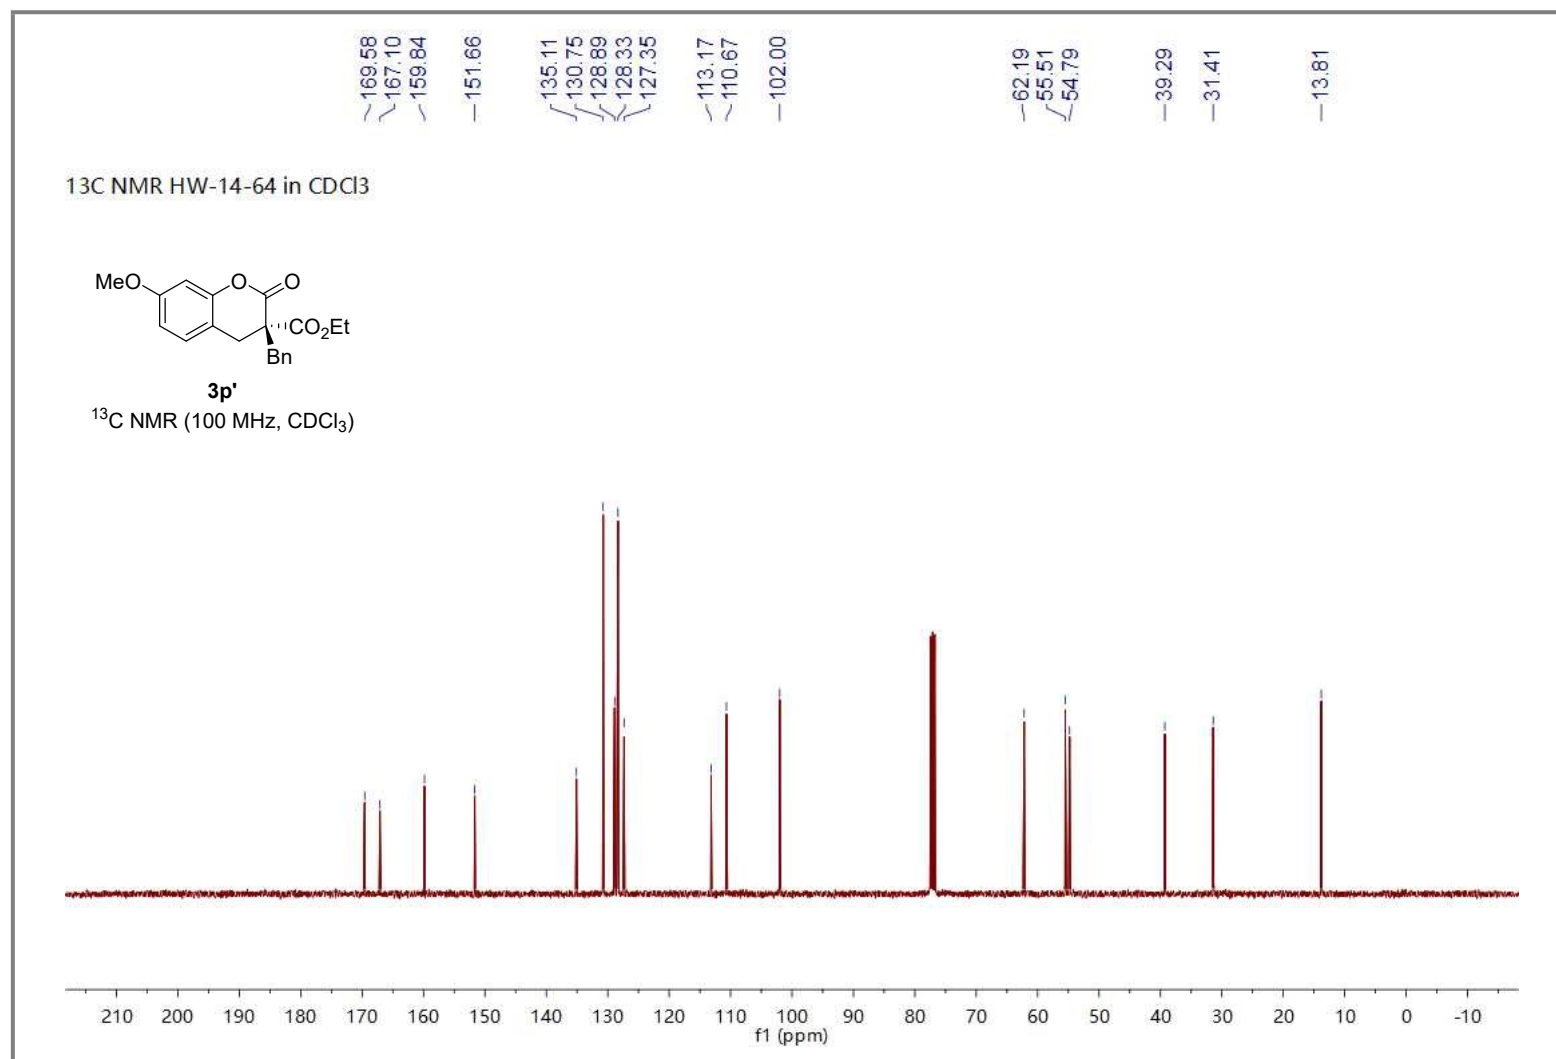

Data File C:\CHEM32\1\DATA\ZHOU-23\YZN023216.D  
 Sample Name: HW-14-73A SM+/-

=====  
 Acq. Operator :  
 Acq. Instrument : Instrument 1 Location : -  
 Injection Date : 5/30/2023 8:44:18 AM  
 Acq. Method : C:\CHEM32\1\METHODS\DEF\_LC.M  
 Last changed : 5/30/2023 8:35:12 AM  
 (modified after loading)  
 Analysis Method : C:\CHEM32\1\METHODS\DEF\_LC.M  
 Last changed : 10/17/2023 10:08:16 AM  
 (modified after loading)  
 Sample Info : od-H, Hexane/i-PrOH = 90/10, 0.8 mL/min, 30 oC, 230 nm

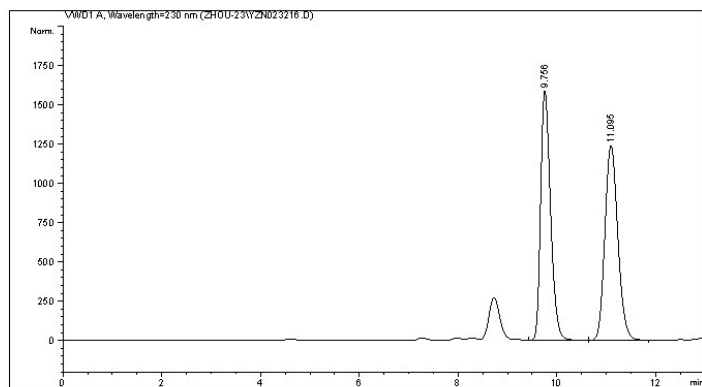

=====  
 Area Percent Report  
 =====

Sorted By : Signal  
 Multiplier: : 1.0000  
 Dilution: : 1.0000  
 Use Multiplier & Dilution Factor with ISTDs

Signal 1: VWD1 A, Wavelength=230 nm

| Peak # | RetTime [min] | Type | Width [min] | Area mAU  | Height %s  | Area [mAU] | Area % |
|--------|---------------|------|-------------|-----------|------------|------------|--------|
| 1      | 9.756         | VV   | 0.2160      | 2.22832e4 | 1589.47205 | 49.4825    |        |
| 2      | 11.095        | VV   | 0.2899      | 2.27492e4 | 1238.88599 | 50.5175    |        |

Totals : 4.50324e4 2828.35803

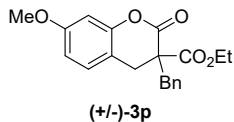

=====  
 \*\*\* End of Report \*\*\*

Data File C:\CHEM32\1\DATA\ZHOU-23\YZN023217.D  
 Sample Name: HW-14-73A SM

=====  
 Acq. Operator :  
 Acq. Instrument : Instrument 1 Location : -  
 Injection Date : 5/30/2023 9:17:42 AM  
 Acq. Method : C:\CHEM32\1\METHODS\DEF\_LC.M  
 Last changed : 5/30/2023 9:17:10 AM  
 (modified after loading)  
 Analysis Method : C:\CHEM32\1\METHODS\DEF\_LC.M  
 Last changed : 10/17/2023 10:09:09 AM  
 (modified after loading)  
 Sample Info : OD-H, Hexane/i-PrOH = 90/10, 0.8 mL/min, 30 oC, 230 nm

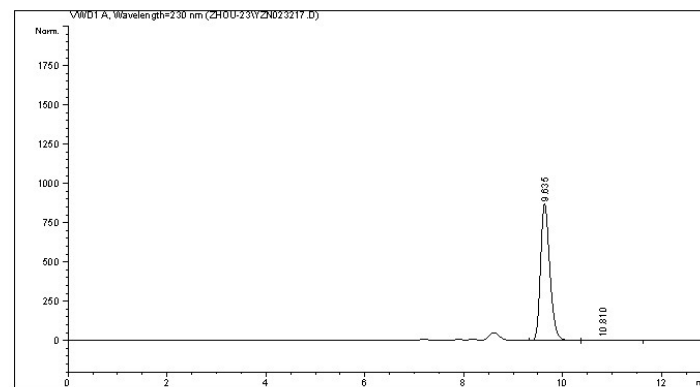

=====  
 Area Percent Report  
 =====

Sorted By : Signal  
 Multiplier: : 1.0000  
 Dilution: : 1.0000  
 Use Multiplier & Dilution Factor with ISTDs

Signal 1: VWD1 A, Wavelength=230 nm

| Peak # | RetTime [min] | Type | Width [min] | Area mAU  | Height %s | Area [mAU] | Area % |
|--------|---------------|------|-------------|-----------|-----------|------------|--------|
| 1      | 9.635         | VV   | 0.2048      | 1.13250e4 | 867.21967 | 98.9115    |        |
| 2      | 10.810        | VV   | 0.4614      | 124.63101 | 4.14512   | 1.0885     |        |

Totals : 1.14497e4 871.36478

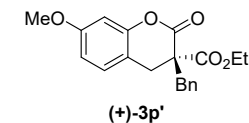

=====  
 \*\*\* End of Report \*\*\*



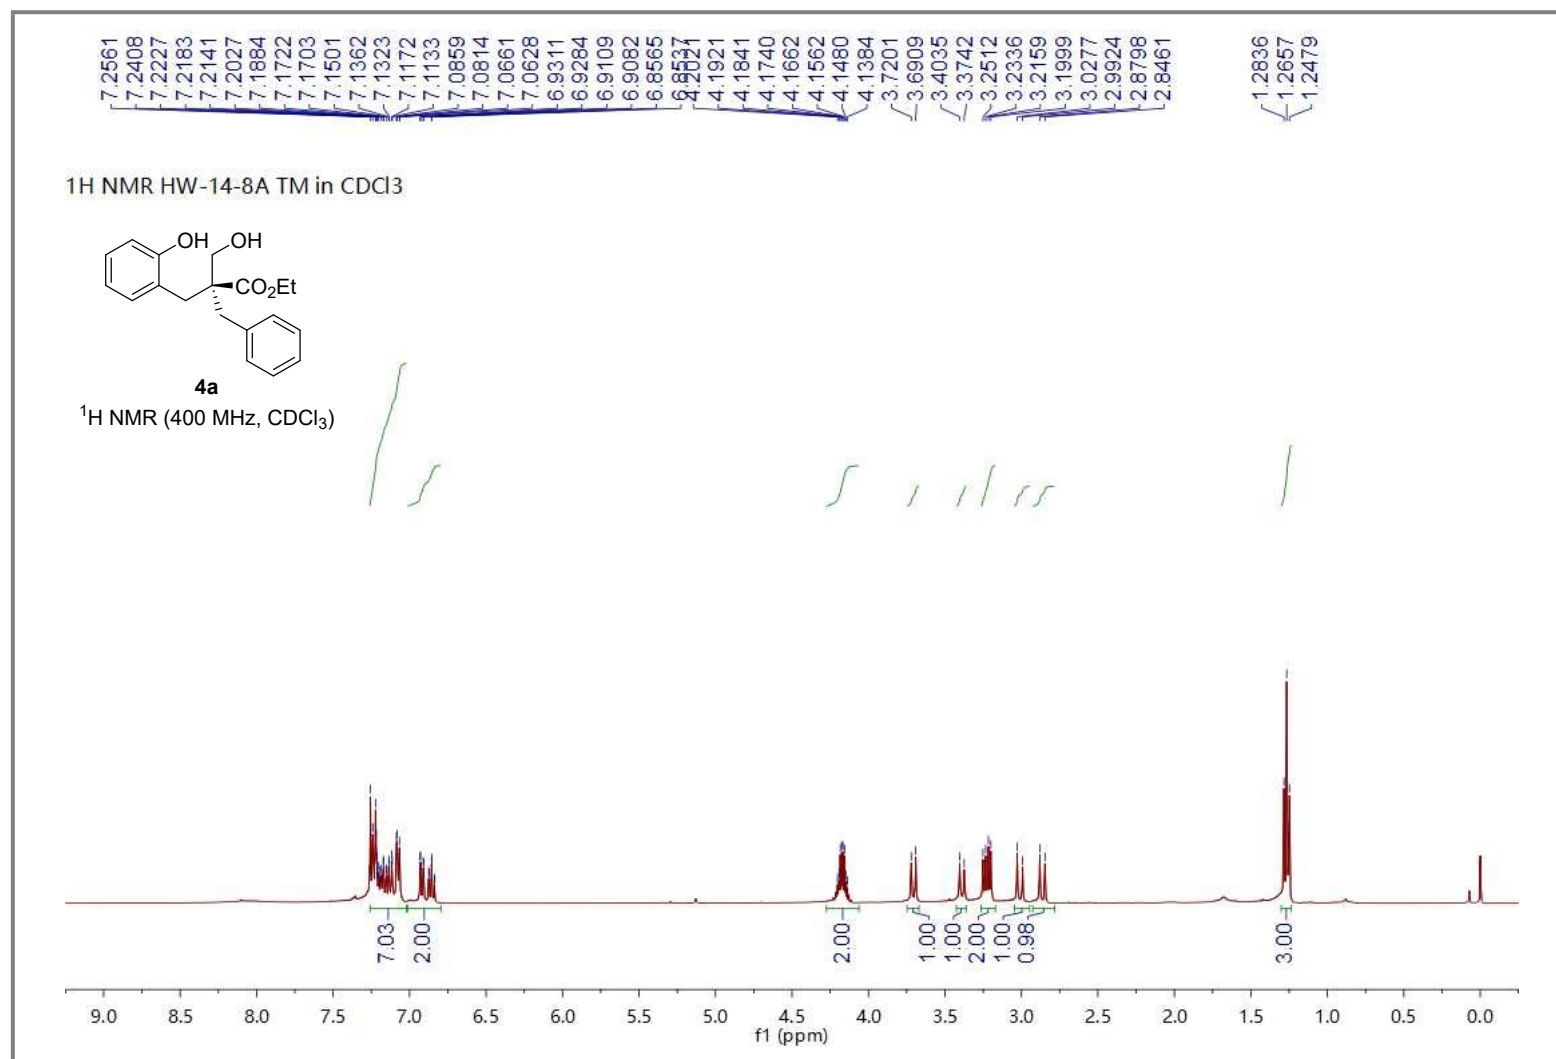

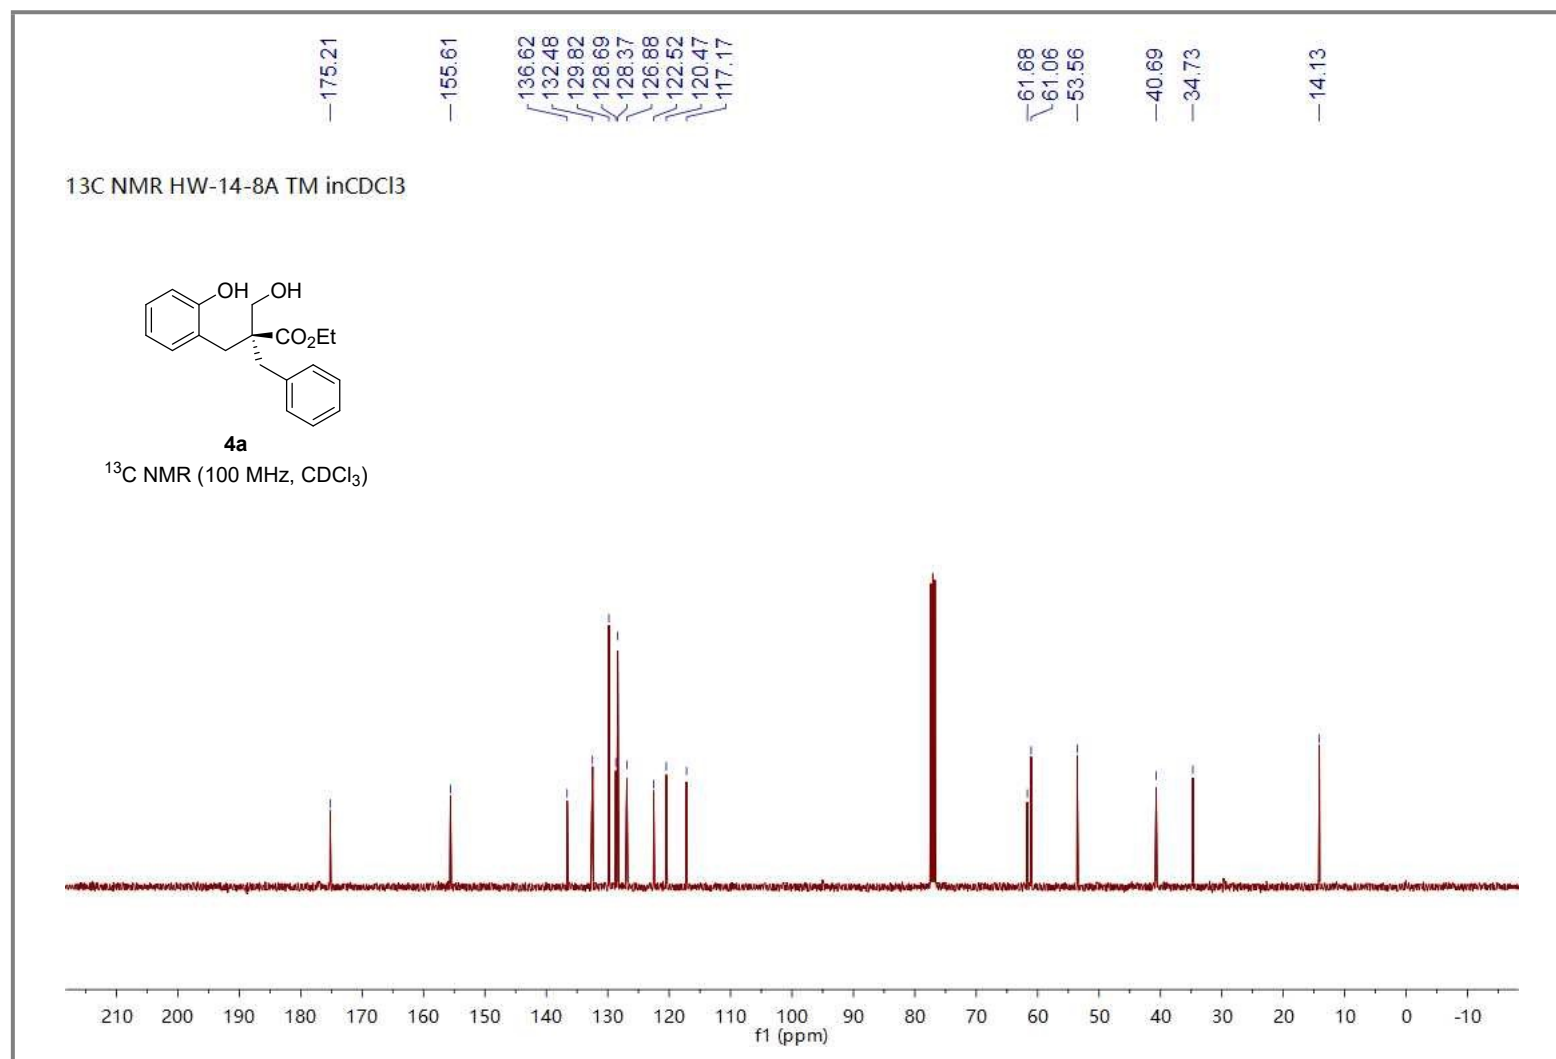

Data File C:\CHEM32\1\DATA\ZHOU-22\YZNO22298.D  
 Sample Name: HW-12-84+/-

=====  
 Acq. Operator :  
 Acq. Instrument : Instrument 1 Location : -  
 Injection Date : 12/30/2022 10:22:40 PM  
 Acq. Method : C:\CHEM32\1\METHODS\DEF\_LC.M  
 Last changed : 12/30/2022 10:22:16 PM  
 (modified after loading)  
 Analysis Method : C:\CHEM32\1\METHODS\DEF\_LC.M  
 Last changed : 10/17/2023 8:35:45 AM  
 (modified after loading)  
 Sample Info : IB, Hexane/i-PrOH = 95/5, 0.8 mL/min, 30 oC, 230 nm

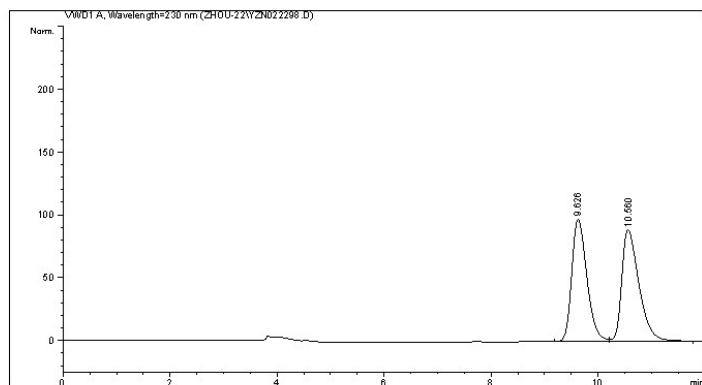

=====  
 Area Percent Report  
 =====

Sorted By : Signal  
 Multiplier: : 1.0000  
 Dilution: : 1.0000  
 Use Multiplier & Dilution Factor with ISTDs

Signal 1: VWD1 A, Wavelength=230 nm

| Peak # | RetTime [min] | Type | Width [min] | Area [mAU*s] | Height [mAU] | Area %  |
|--------|---------------|------|-------------|--------------|--------------|---------|
| 1      | 9.626         | BV   | 0.3044      | 1919.77893   | 97.30987     | 49.1682 |
| 2      | 10.560        | VB   | 0.3395      | 1984.73413   | 88.77587     | 50.8318 |

Totals : 3904.51306 186.08574

=====  
 \*\*\* End of Report \*\*\*

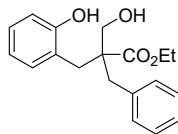

(+/-)-4a

Data File C:\USERS\PUBLIC\DOCUMENTS\CHEMSTATION\1\DATA\2023\YZH003727 20-08-27.D  
 Sample Name: HW-14-8A TM

=====  
 Acq. Operator : SYSTEM  
 Sample Operator : SYSTEM  
 Acq. Instrument : HPLC1260 II Location : 1  
 Injection Date : 3/22/2023 8:08:27 PM Inj : 1  
 Inj Volume : No inj  
 Acq. Method : C:\USERS\PUBLIC\DOCUMENTS\CHEMSTATION\1\METHODS\def\_LC1.M  
 Last changed : 3/22/2023 7:43:25 PM by SYSTEM  
 (modified after loading)  
 Analysis Method : C:\USERS\PUBLIC\DOCUMENTS\CHEMSTATION\1\METHODS\def\_LC1.M  
 Last changed : 10/16/2023 8:57:56 PM by SYSTEM  
 (modified after loading)  
 Sample Info : IB, Hexane/i-PrOH = 95/5, 0.8 mL/min, 30 oC, 230 nm

Additional Info : Peak(s) manually integrated

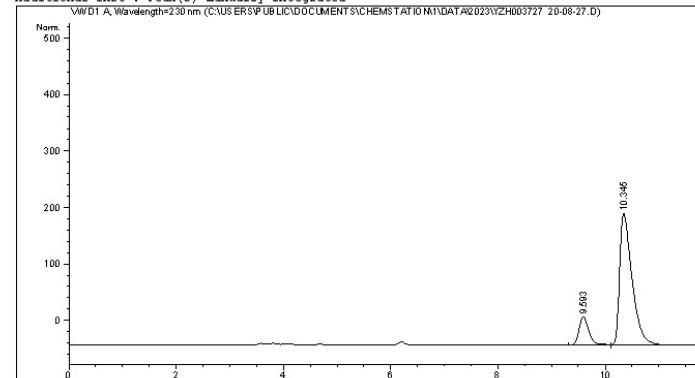

=====  
 Area Percent Report  
 =====

Sorted By : Signal  
 Multiplier : 1.0000  
 Dilution : 1.0000  
 Sample Amount : 1.00000 [ng/ul] (not used in calc.)  
 Do not use Multiplier & Dilution Factor with ISTDs

Signal 1: VWD1 A, Wavelength=230 nm

| Peak # | RetTime [min] | Type | Width [min] | Area [mAU*s] | Height [mAU] | Area %  |
|--------|---------------|------|-------------|--------------|--------------|---------|
| 1      | 9.593         | BV   | 0.1944      | 404.16336    | 31.55659     | 14.6134 |
| 2      | 10.345        | VB   | 0.2394      | 2361.54614   | 146.99408    | 85.3866 |

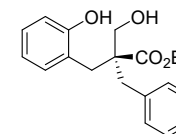

(+)-4a

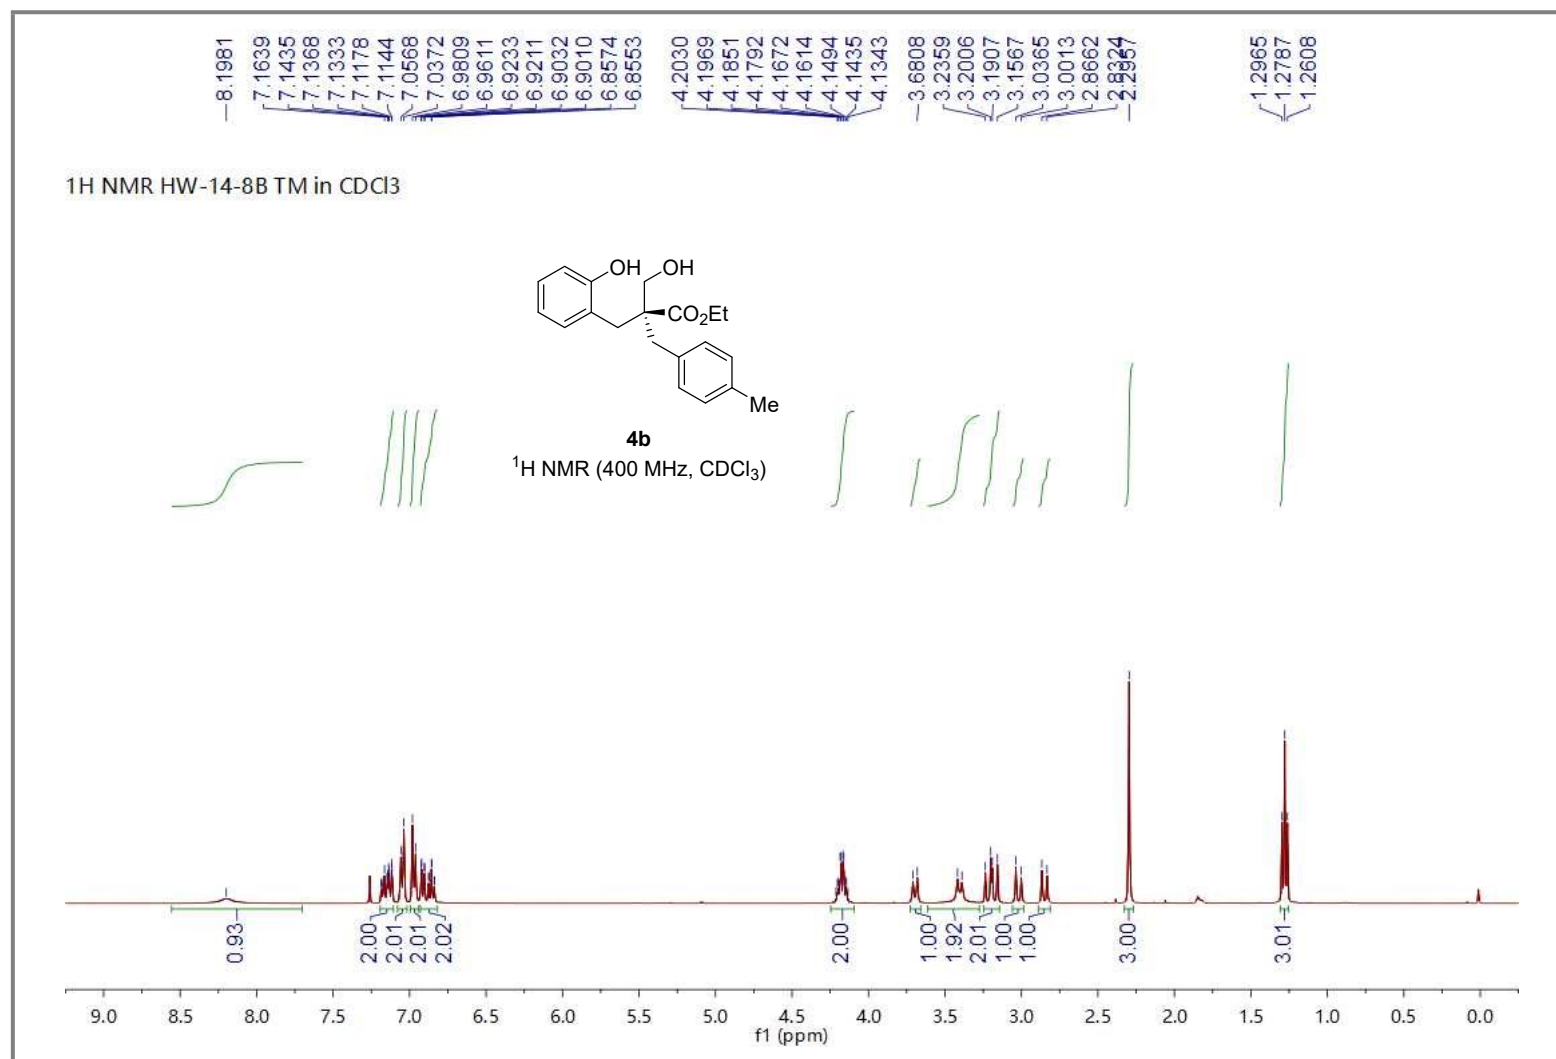

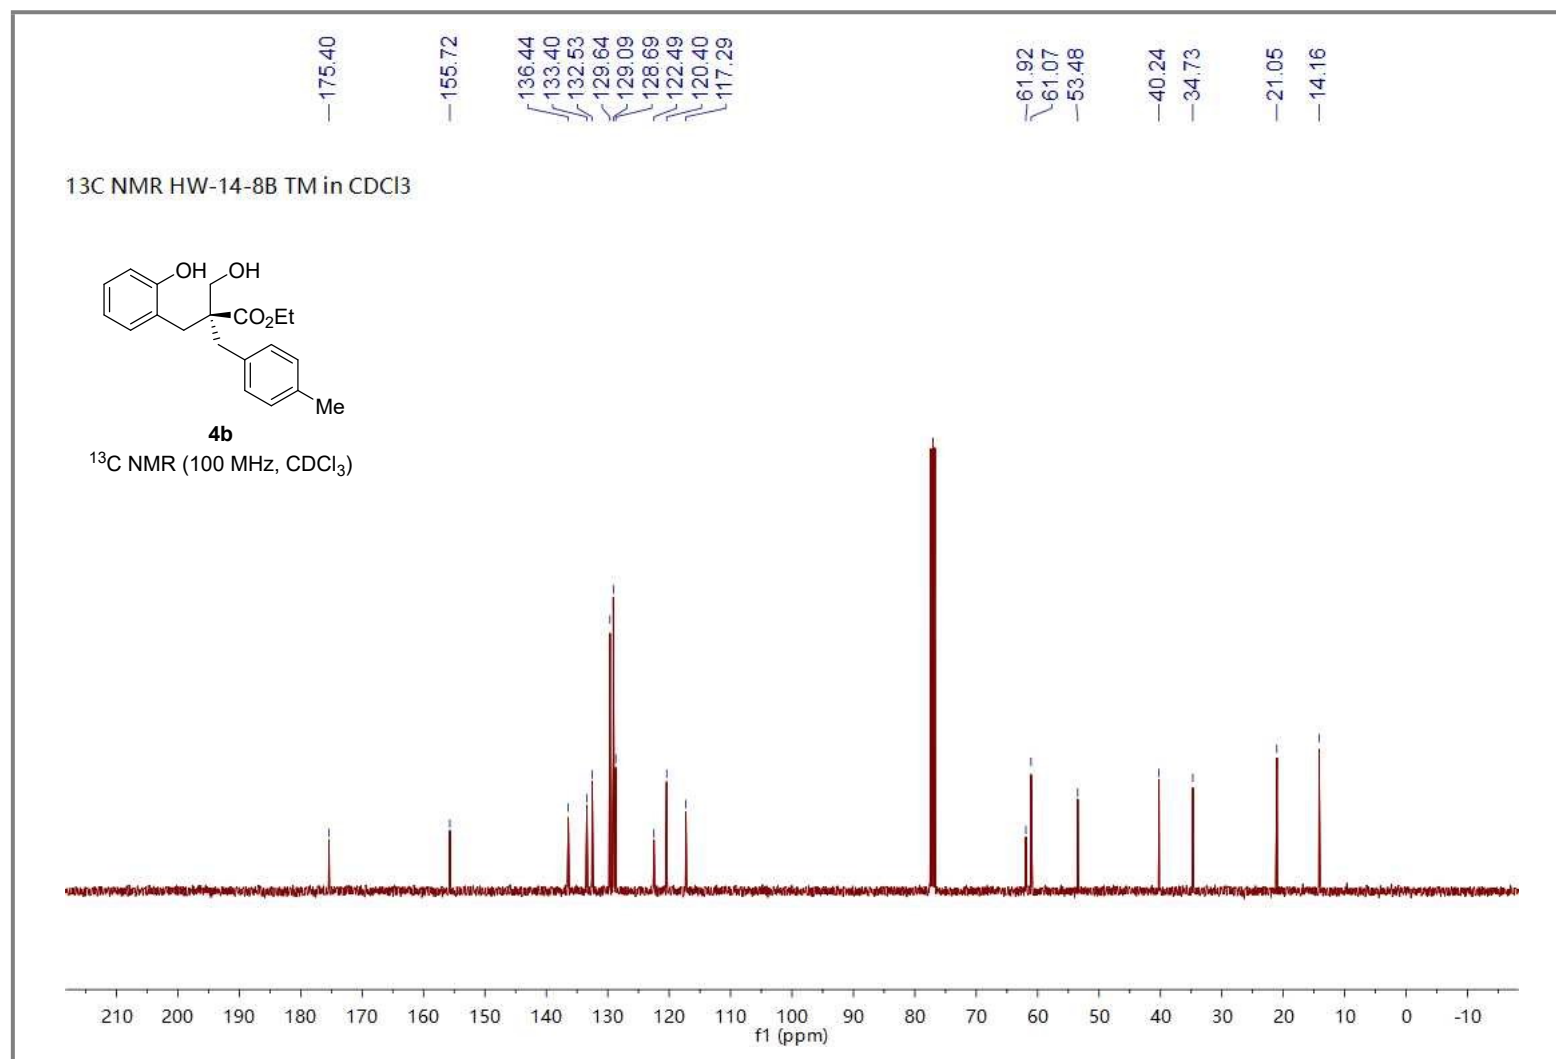

Data File C:\USERS\PUBLIC\DOCUMENTS\CHEMSTATION\1\DATA\2023\YZH003731 21-31-16.D  
 Sample Name: HW-14-8C TM+/-

```

=====
Acq. Operator   : SYSTEM
Sample Operator : SYSTEM
Acq. Instrument : HPLC1260 II           Location : 1
Injection Date  : 3/22/2023 9:31:16 PM Inj       : 1
                                           Inj Volume : No inj
Acq. Method    : C:\USERS\PUBLIC\DOCUMENTS\CHEMSTATION\1\METHODS\def_LC1.M
Last changed   : 3/22/2023 7:43:25 PM by SYSTEM
               (modified after loading)
Analysis Method : C:\USERS\PUBLIC\DOCUMENTS\CHEMSTATION\1\METHODS\def_LC1.M
Last changed   : 10/16/2023 9:05:43 PM by SYSTEM
               (modified after loading)
Sample Info    : IB, Hexane/i-PrOH = 95/5, 0.8 mL/min, 30 oC, 230 nm
  
```

Additional Info : Peak(s) manually integrated

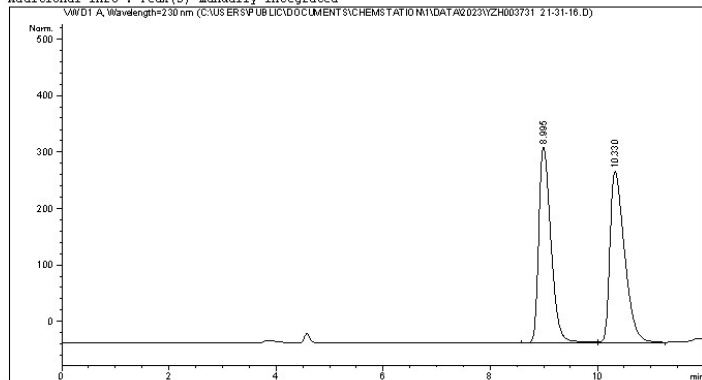

Area Percent Report

```

=====
Sorted By      : Signal
Multiplier     : 1.0000
Dilution       : 1.0000
Sample Amount  : 1.00000 [ng/ul] (not used in calc.)
Do not use Multiplier & Dilution Factor with ISTDs
  
```

Signal 1: VWD1 A, Wavelength=230 nm

| Peak # | RetTime [min] | Type | Width [min] | Area [mAU*s] | Height [mAU] | Area %  |
|--------|---------------|------|-------------|--------------|--------------|---------|
| 1      | 8.995         | BV R | 0.2435      | 4275.72021   | 271.88998    | 48.8896 |
| 2      | 10.330        | VB   | 0.2896      | 4469.95020   | 237.51076    | 51.1104 |

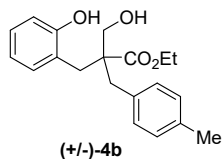

HPLC1260 II 10/16/2023 9:05:48 PM SYSTEM

Page 1 of 2

Data File C:\USERS\PUBLIC\DOCUMENTS\CHEMSTATION\1\DATA\2023\YZH003732 21-59-01.D  
 Sample Name: HW-14-8C TM

```

=====
Acq. Operator   : SYSTEM
Sample Operator : SYSTEM
Acq. Instrument : HPLC1260 II           Location : 1
Injection Date  : 3/22/2023 9:59:02 PM Inj       : 1
                                           Inj Volume : No inj
Acq. Method    : C:\USERS\PUBLIC\DOCUMENTS\CHEMSTATION\1\METHODS\def_LC1.M
Last changed   : 3/22/2023 7:43:25 PM by SYSTEM
               (modified after loading)
Analysis Method : C:\USERS\PUBLIC\DOCUMENTS\CHEMSTATION\1\METHODS\def_LC1.M
Last changed   : 10/16/2023 9:04:43 PM by SYSTEM
               (modified after loading)
Sample Info    : IB, Hexane/i-PrOH = 95/5, 0.8 mL/min, 30 oC, 230 nm
  
```

Additional Info : Peak(s) manually integrated

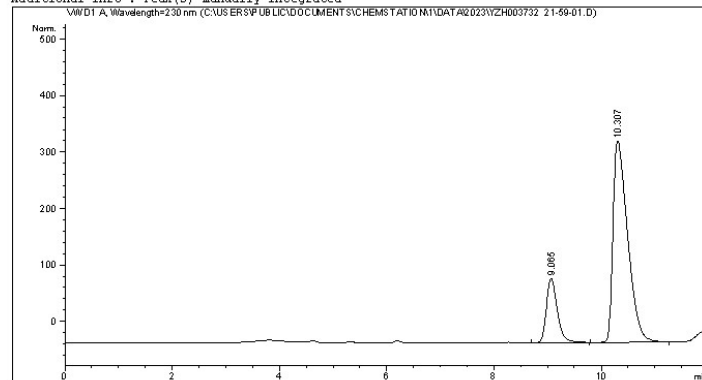

Area Percent Report

```

=====
Sorted By      : Signal
Multiplier     : 1.0000
Dilution       : 1.0000
Sample Amount  : 1.00000 [ng/ul] (not used in calc.)
Do not use Multiplier & Dilution Factor with ISTDs
  
```

Signal 1: VWD1 A, Wavelength=230 nm

| Peak # | RetTime [min] | Type | Width [min] | Area [mAU*s] | Height [mAU] | Area %  |
|--------|---------------|------|-------------|--------------|--------------|---------|
| 1      | 9.065         | BB   | 0.2145      | 1265.45081   | 90.30990     | 19.1985 |
| 2      | 10.307        | BB   | 0.2875      | 5325.93701   | 283.06808    | 80.8015 |

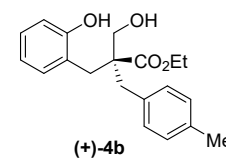

HPLC1260 II 10/16/2023 9:04:46 PM SYSTEM

Page 1 of 2

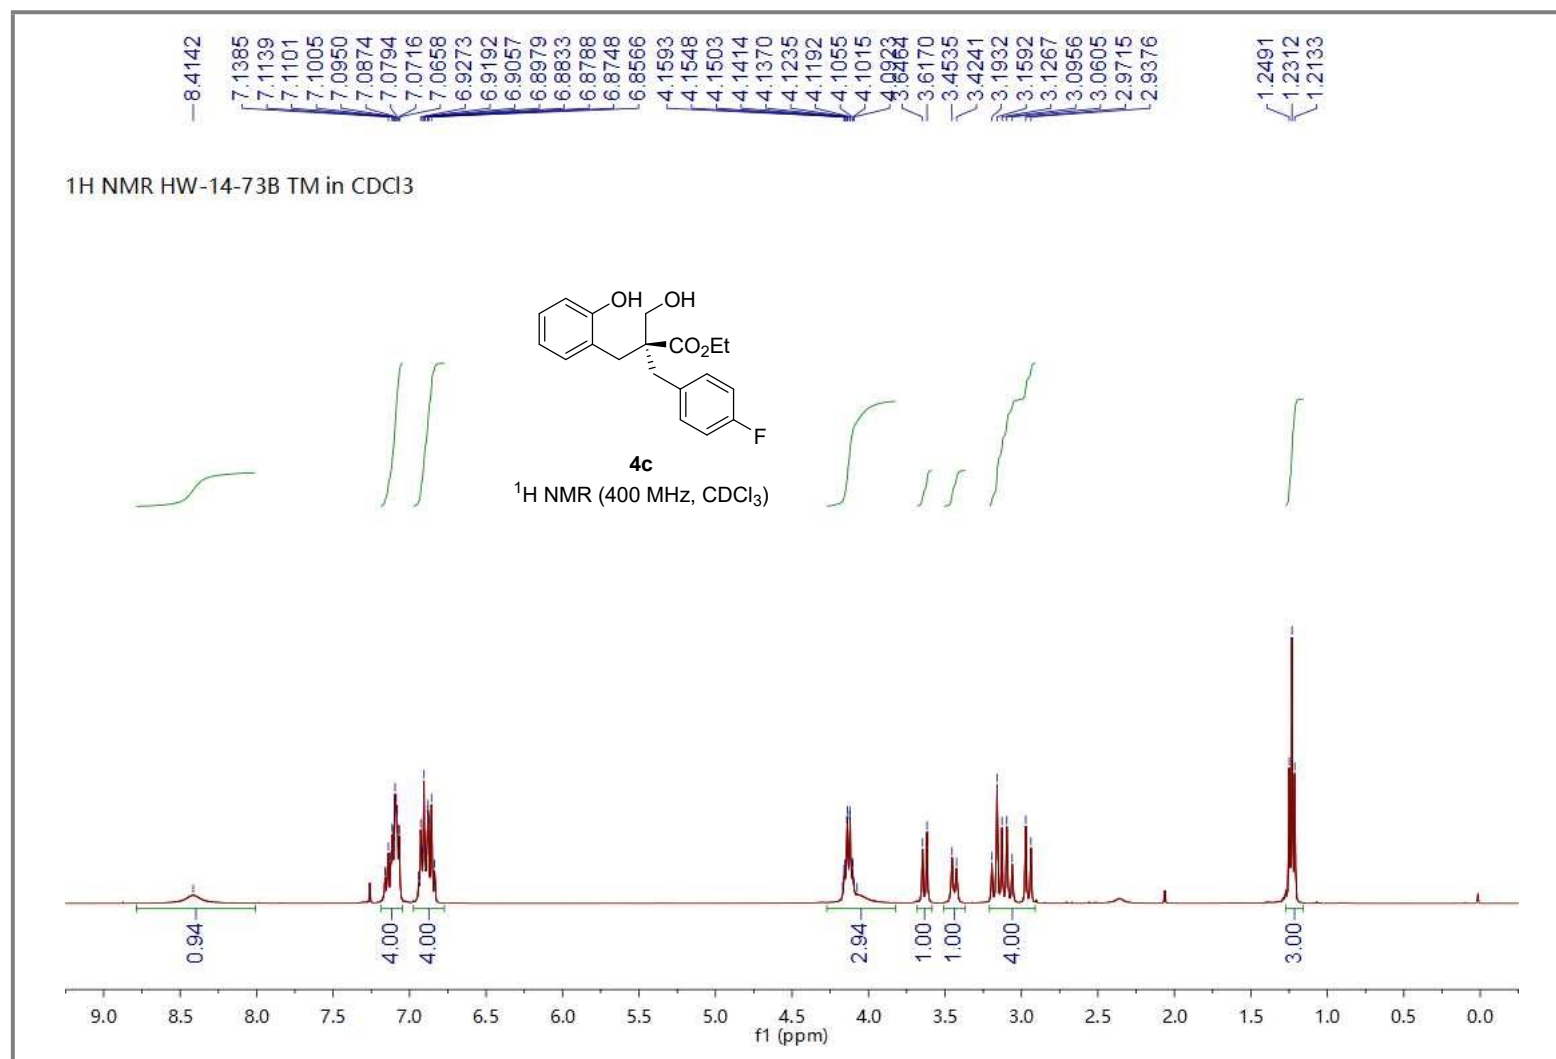

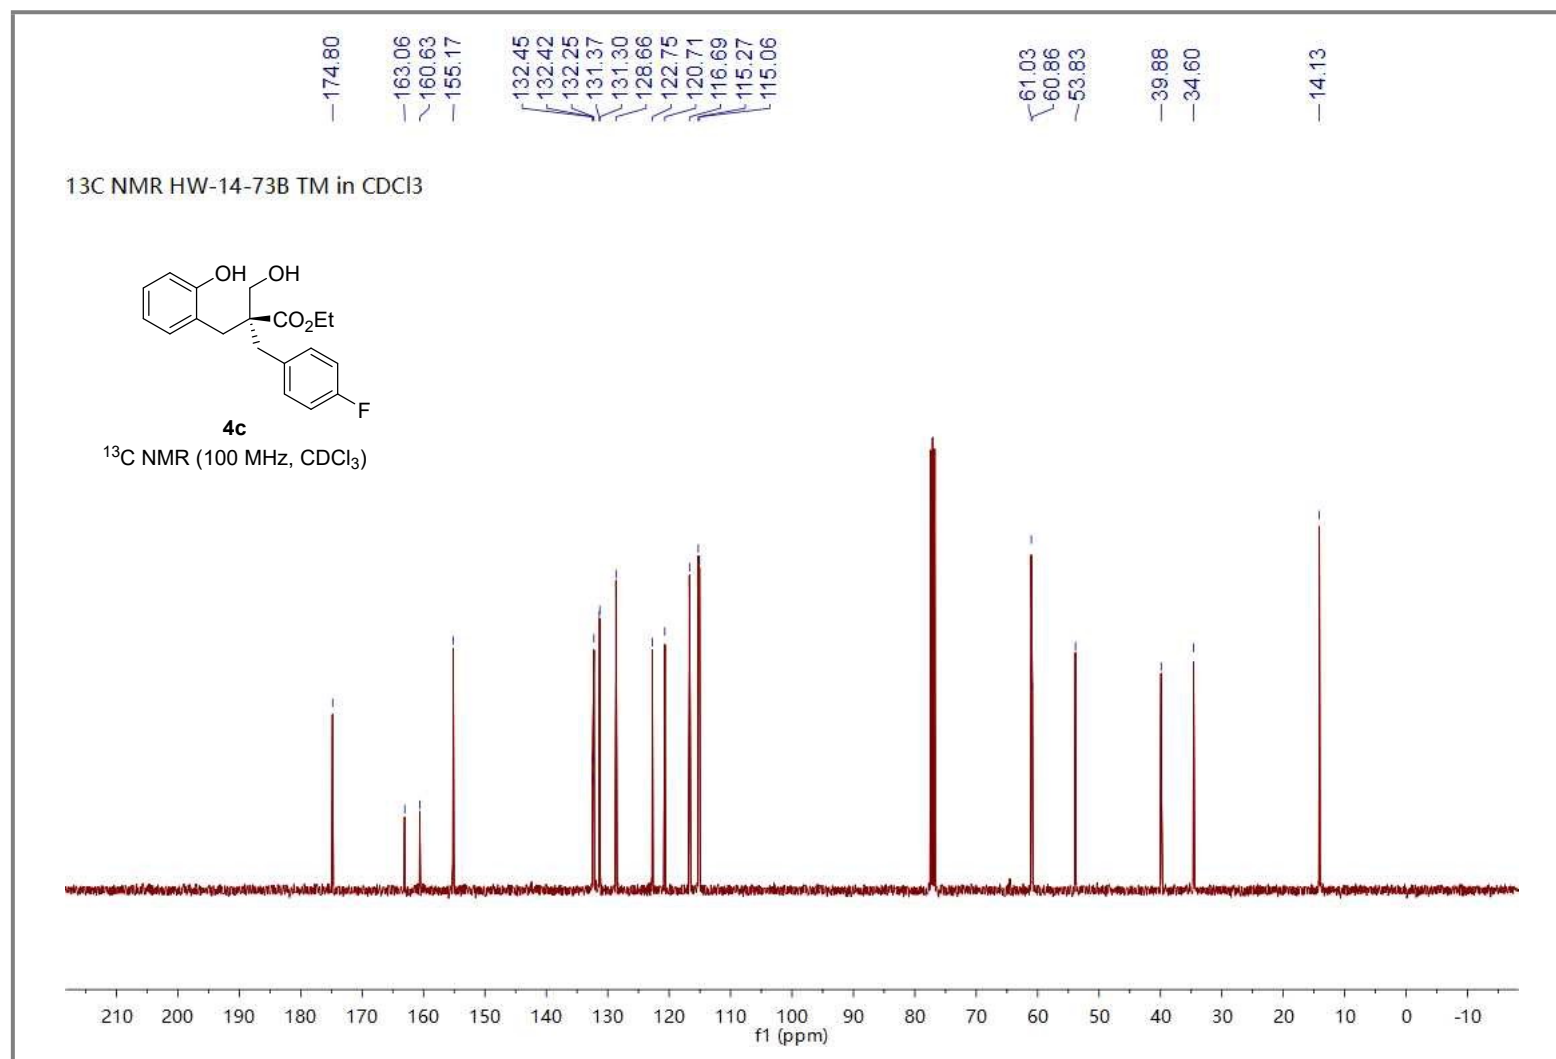



<sup>19</sup>F NMR HW-14-73B in CDCl<sub>3</sub>

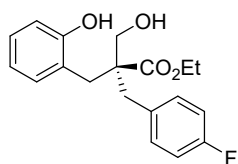

**4c**

<sup>19</sup>F NMR (376 MHz, CDCl<sub>3</sub>)

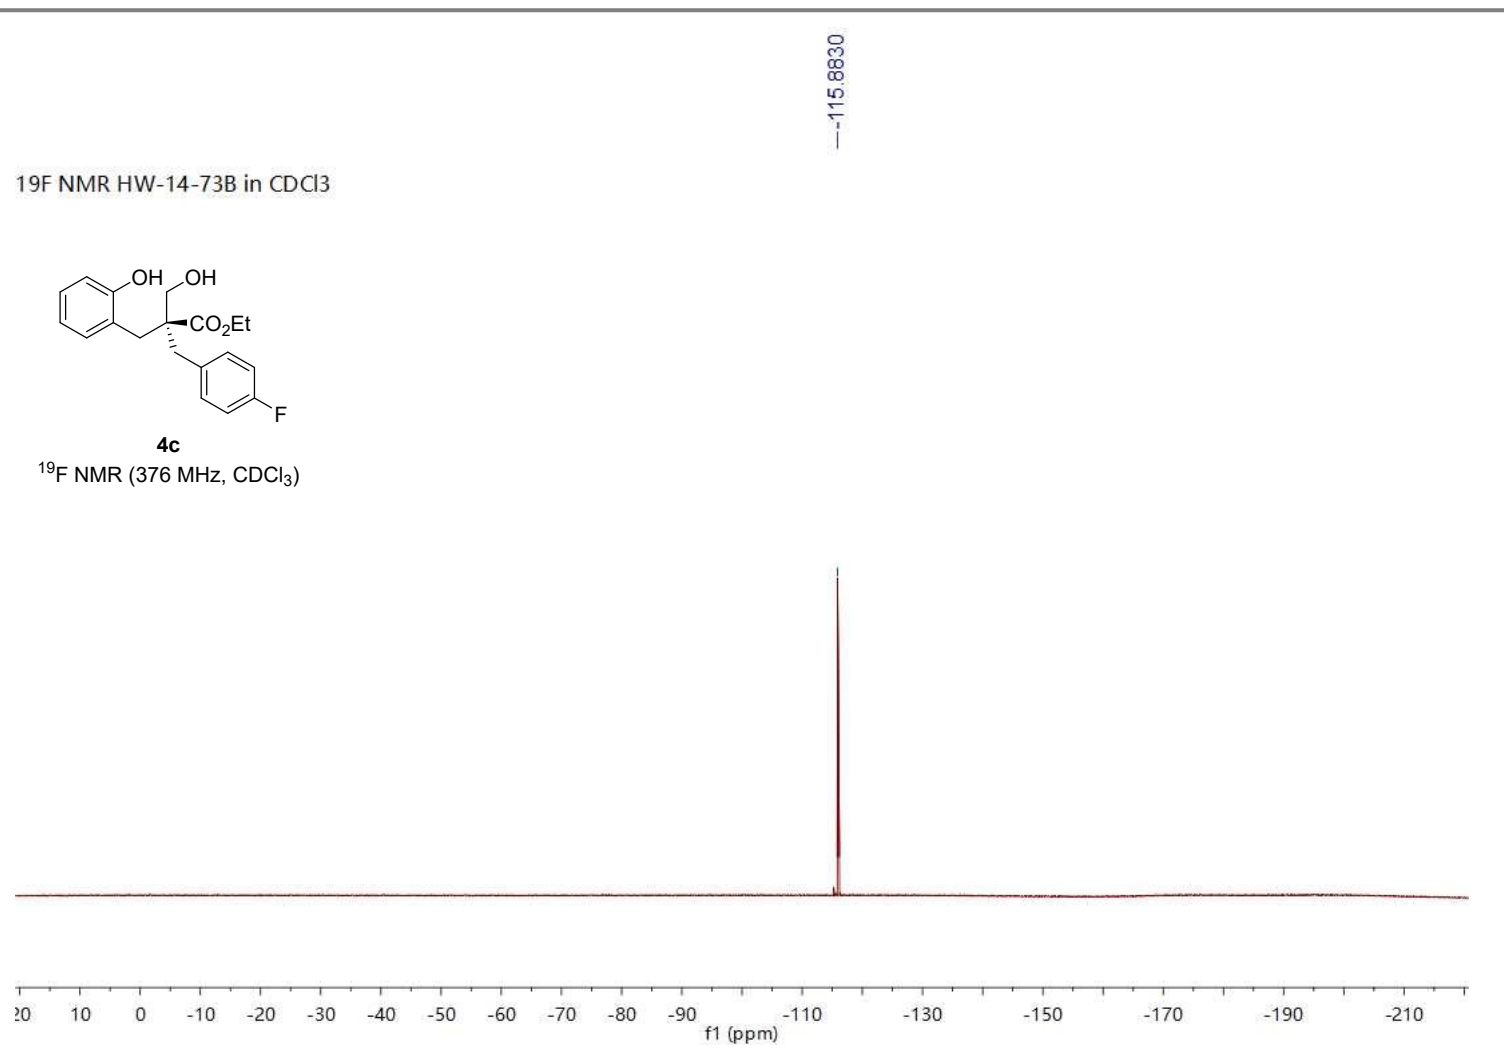

Data File C:\CHEM32\1\DATA\ZHOU-23\YZN023231.D  
Sample Name: HW-14-73CTH+/-

=====  
Acq. Operator :  
Acq. Instrument : Instrument 1 Location : -  
Injection Date : 5/31/2023 5:07:35 AM  
Acq. Method : C:\CHEM32\1\METHODS\DEF\_LC.M  
Last changed : 5/31/2023 5:07:01 AM  
(modified after loading)  
Analysis Method : C:\CHEM32\1\METHODS\DEF\_LC.M  
Last changed : 10/17/2023 9:00:02 AM  
(modified after loading)  
Sample Info : IB, Hexane/i-PrOH = 95/5, 0.8 mL/min, 30 oC, 230 nm

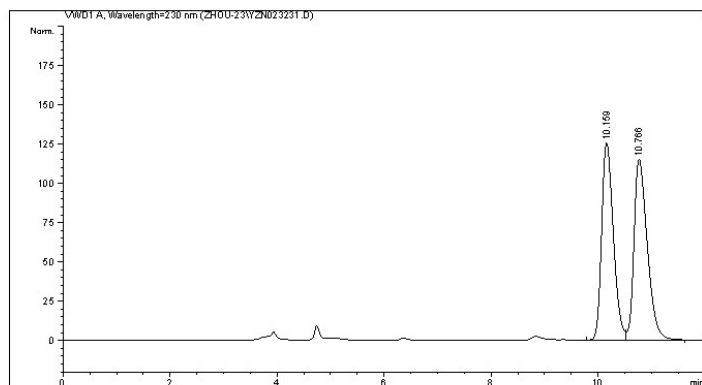

=====  
Area Percent Report  
=====

Sorted By : Signal  
Multiplier: : 1.0000  
Dilution: : 1.0000  
Use Multiplier & Dilution Factor with ISTDs

Signal 1: VWD1 A, Wavelength=230 nm

| Peak # | RetTime [min] | Type | Width [min] | Area mAU   | Height %s | Area [mAU] | Area % |
|--------|---------------|------|-------------|------------|-----------|------------|--------|
| 1      | 10.159        | BV   | 0.2354      | 1904.47192 | 125.44061 | 48.9206    |        |
| 2      | 10.766        | VB   | 0.2642      | 1988.51709 | 115.10017 | 51.0794    |        |

Totals : 3892.98901 240.54079

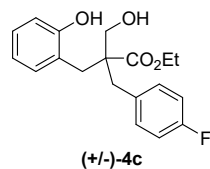

=====  
\*\*\* End of Report \*\*\*

Instrument 1 10/17/2023 9:00:10 AM

Page 1 of 1

Data File C:\CHEM32\1\DATA\ZHOU-23\YZN023232.D  
Sample Name: HW-14-73CTM

=====  
Acq. Operator :  
Acq. Instrument : Instrument 1 Location : -  
Injection Date : 5/31/2023 5:22:40 AM  
Acq. Method : C:\CHEM32\1\METHODS\DEF\_LC.M  
Last changed : 5/31/2023 5:22:17 AM  
(modified after loading)  
Analysis Method : C:\CHEM32\1\METHODS\DEF\_LC.M  
Last changed : 10/17/2023 9:01:10 AM  
(modified after loading)  
Sample Info : IB, Hexane/i-PrOH = 95/5, 0.8 mL/min, 30 oC, 230 nm

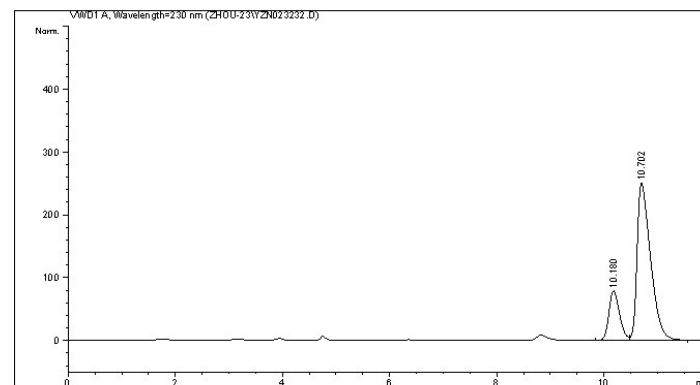

=====  
Area Percent Report  
=====

Sorted By : Signal  
Multiplier: : 1.0000  
Dilution: : 1.0000  
Use Multiplier & Dilution Factor with ISTDs

Signal 1: VWD1 A, Wavelength=230 nm

| Peak # | RetTime [min] | Type | Width [min] | Area mAU   | Height %s | Area [mAU] | Area % |
|--------|---------------|------|-------------|------------|-----------|------------|--------|
| 1      | 10.180        | BV   | 0.2112      | 1080.59412 | 78.68358  | 19.9336    |        |
| 2      | 10.702        | VB   | 0.2638      | 4340.38330 | 249.85710 | 80.0664    |        |

Totals : 5420.97742 328.54068

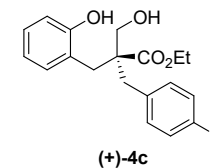

=====  
\*\*\* End of Report \*\*\*

Instrument 1 10/17/2023 9:01:14 AM

Page 1 of 1

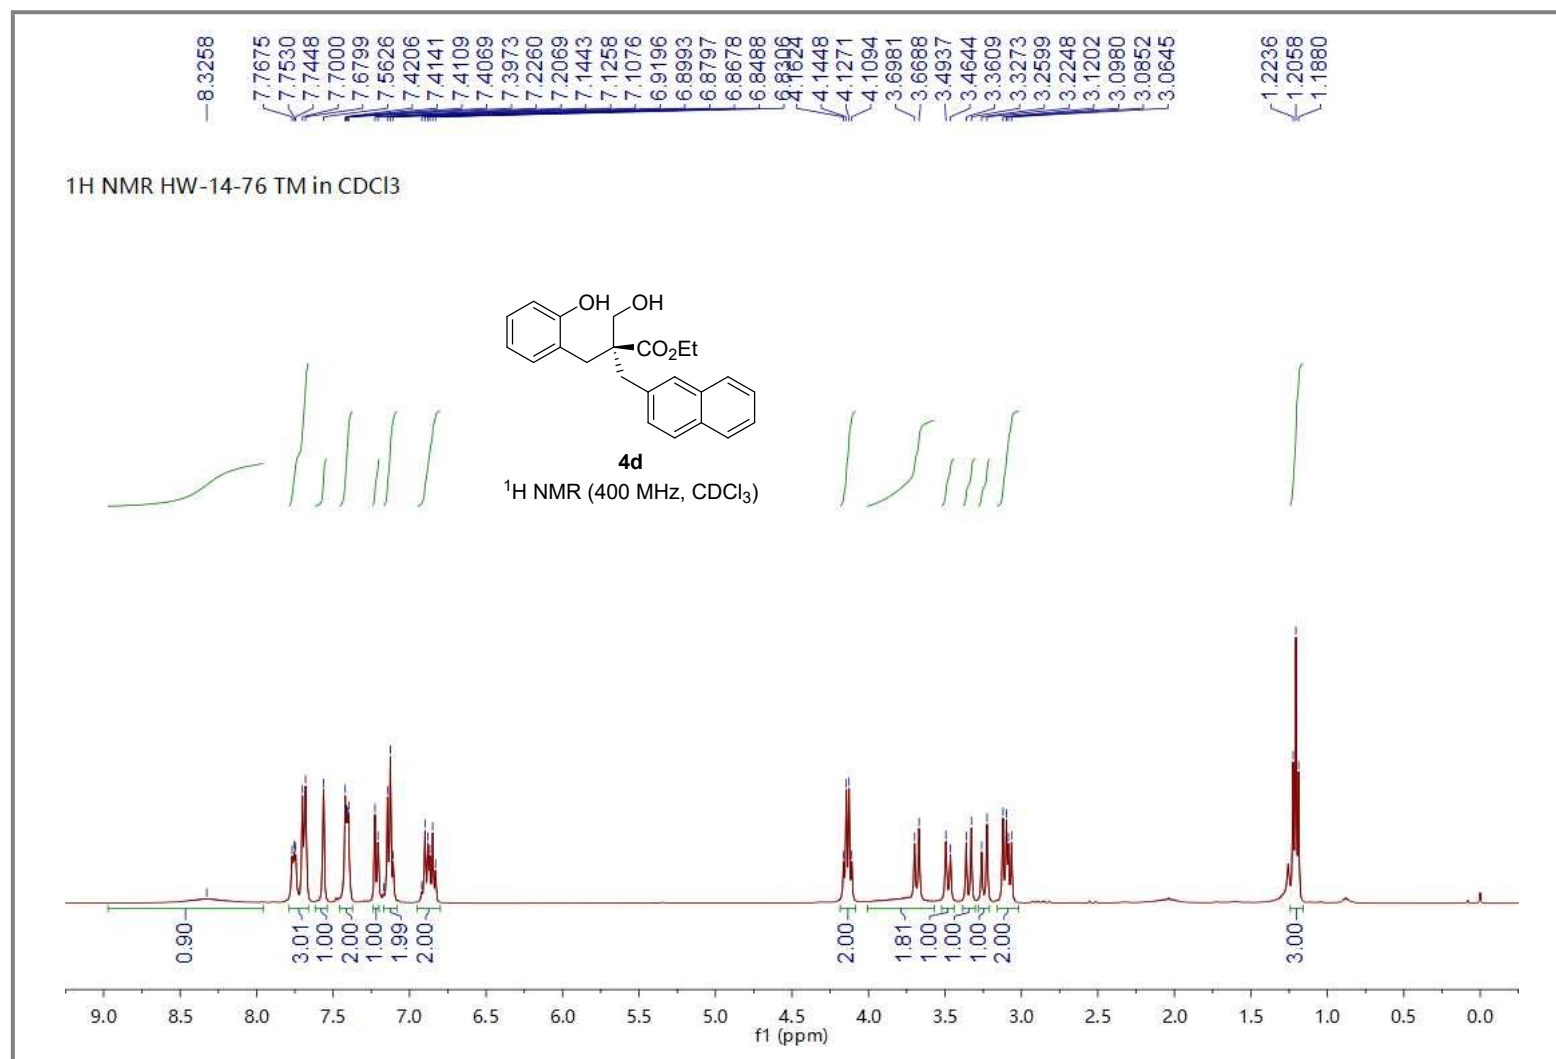

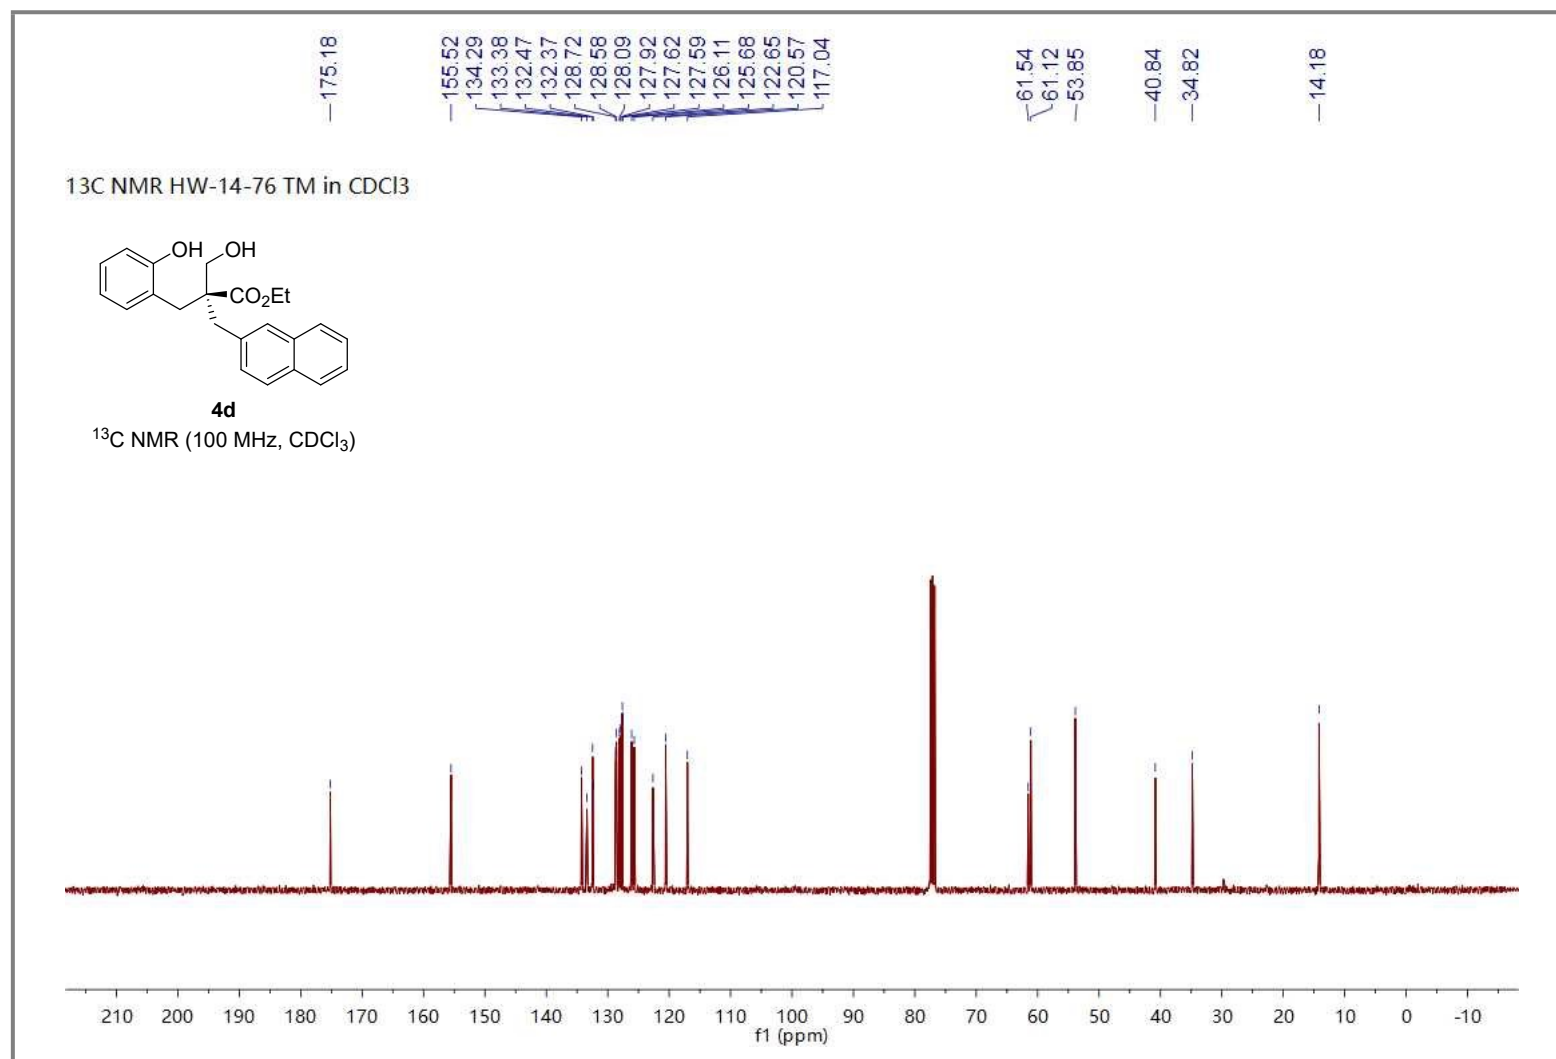

Data File C:\USERS\PUBLIC\DOCUMENTS\CHEMSTATION\1\DATA\2023\YZH003753 15-55-23.D  
 Sample Name: HW-14-8C TH+/-

=====  
 Acq. Operator : SYSTEM  
 Sample Operator : SYSTEM  
 Acq. Instrument : HPLC1260 II Location : 1  
 Injection Date : 3/24/2023 3:55:23 PM Inj : 1  
 Inj Volume : No inj  
 Acq. Method : C:\USERS\PUBLIC\DOCUMENTS\CHEMSTATION\1\METHODS\def\_LC1.M  
 Last changed : 3/24/2023 2:09:49 PM by SYSTEM  
 (modified after loading)  
 Analysis Method : C:\USERS\PUBLIC\DOCUMENTS\CHEMSTATION\1\METHODS\def\_LC1.M  
 Last changed : 10/16/2023 9:21:23 PM by SYSTEM  
 (modified after loading)  
 Sample Info : IA, Hexane/i-PrOH = 95/5, 0.8 mL/min, 30 oC, 230 nm

Additional Info : Peak(s) manually integrated

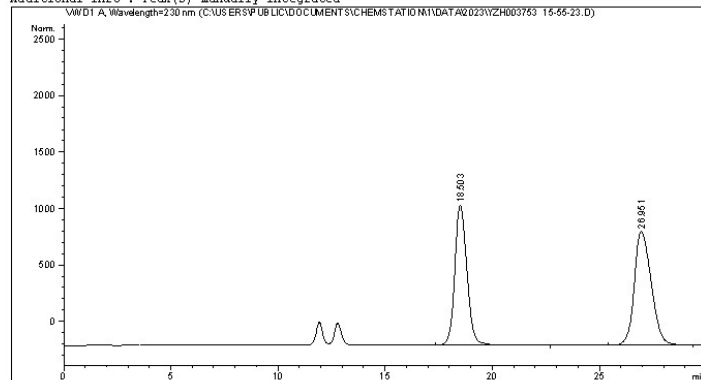

=====  
 Area Percent Report  
 =====

Sorted By : Signal  
 Multiplier : 1.0000  
 Dilution : 1.0000  
 Sample Amount : 1.00000 [ng/ul] (not used in calc.)  
 Do not use Multiplier & Dilution Factor with ISTDs

Signal 1: VWD1 A, Wavelength=230 nm

| Peak # | RetTime [min] | Type | Width [min] | Area [mAU*s] | Height [mAU] | Area %  |
|--------|---------------|------|-------------|--------------|--------------|---------|
| 1      | 18.503        | BB   | 0.6219      | 3.20917e4    | 812.29633    | 46.9001 |
| 2      | 26.951        | BB   | 0.8646      | 3.63340e4    | 662.75378    | 53.0999 |

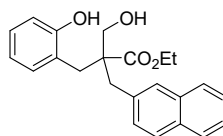

(+/-)-4d

Data File C:\USERS\PUBLIC\DOCUMENTS\CHEMSTATION\1\DATA\2023\YZH004328 10-47-19.D  
 Sample Name: HW-14-76TM

=====  
 Acq. Operator : SYSTEM  
 Sample Operator : SYSTEM  
 Acq. Instrument : HPLC1260 II Location : 1  
 Injection Date : 6/6/2023 10:47:19 AM Inj : 1  
 Inj Volume : No inj  
 Acq. Method : C:\USERS\PUBLIC\DOCUMENTS\CHEMSTATION\1\METHODS\def\_LC1.M  
 Last changed : 6/6/2023 10:41:04 AM by SYSTEM  
 (modified after loading)  
 Analysis Method : C:\USERS\PUBLIC\DOCUMENTS\CHEMSTATION\1\METHODS\def\_LC1.M  
 Last changed : 10/16/2023 9:20:30 PM by SYSTEM  
 (modified after loading)  
 Sample Info : IA, Hexane/i-PrOH = 95/5, 0.8 mL/min, 30 oC, 230 nm

Additional Info : Peak(s) manually integrated

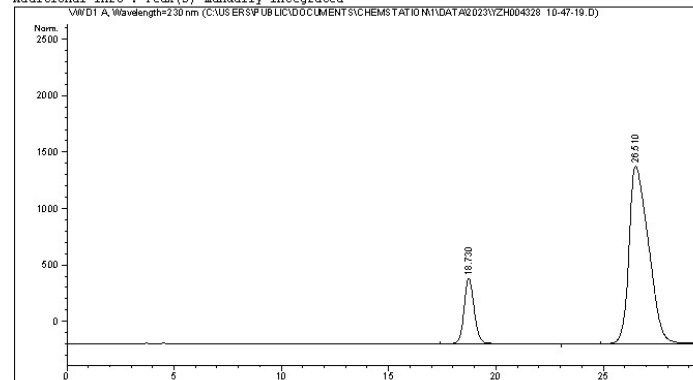

=====  
 Area Percent Report  
 =====

Sorted By : Signal  
 Multiplier : 1.0000  
 Dilution : 1.0000  
 Sample Amount : 1.00000 [ng/ul] (not used in calc.)  
 Do not use Multiplier & Dilution Factor with ISTDs

Signal 1: VWD1 A, Wavelength=230 nm

| Peak # | RetTime [min] | Type | Width [min] | Area [mAU*s] | Height [mAU] | Area %  |
|--------|---------------|------|-------------|--------------|--------------|---------|
| 1      | 18.730        | BB   | 0.5175      | 1.46792e4    | 437.40421    | 16.4315 |
| 2      | 26.510        | BB   | 1.0464      | 7.46569e4    | 1182.81482   | 83.5685 |

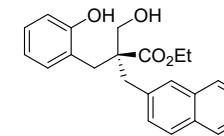

(+)-4d

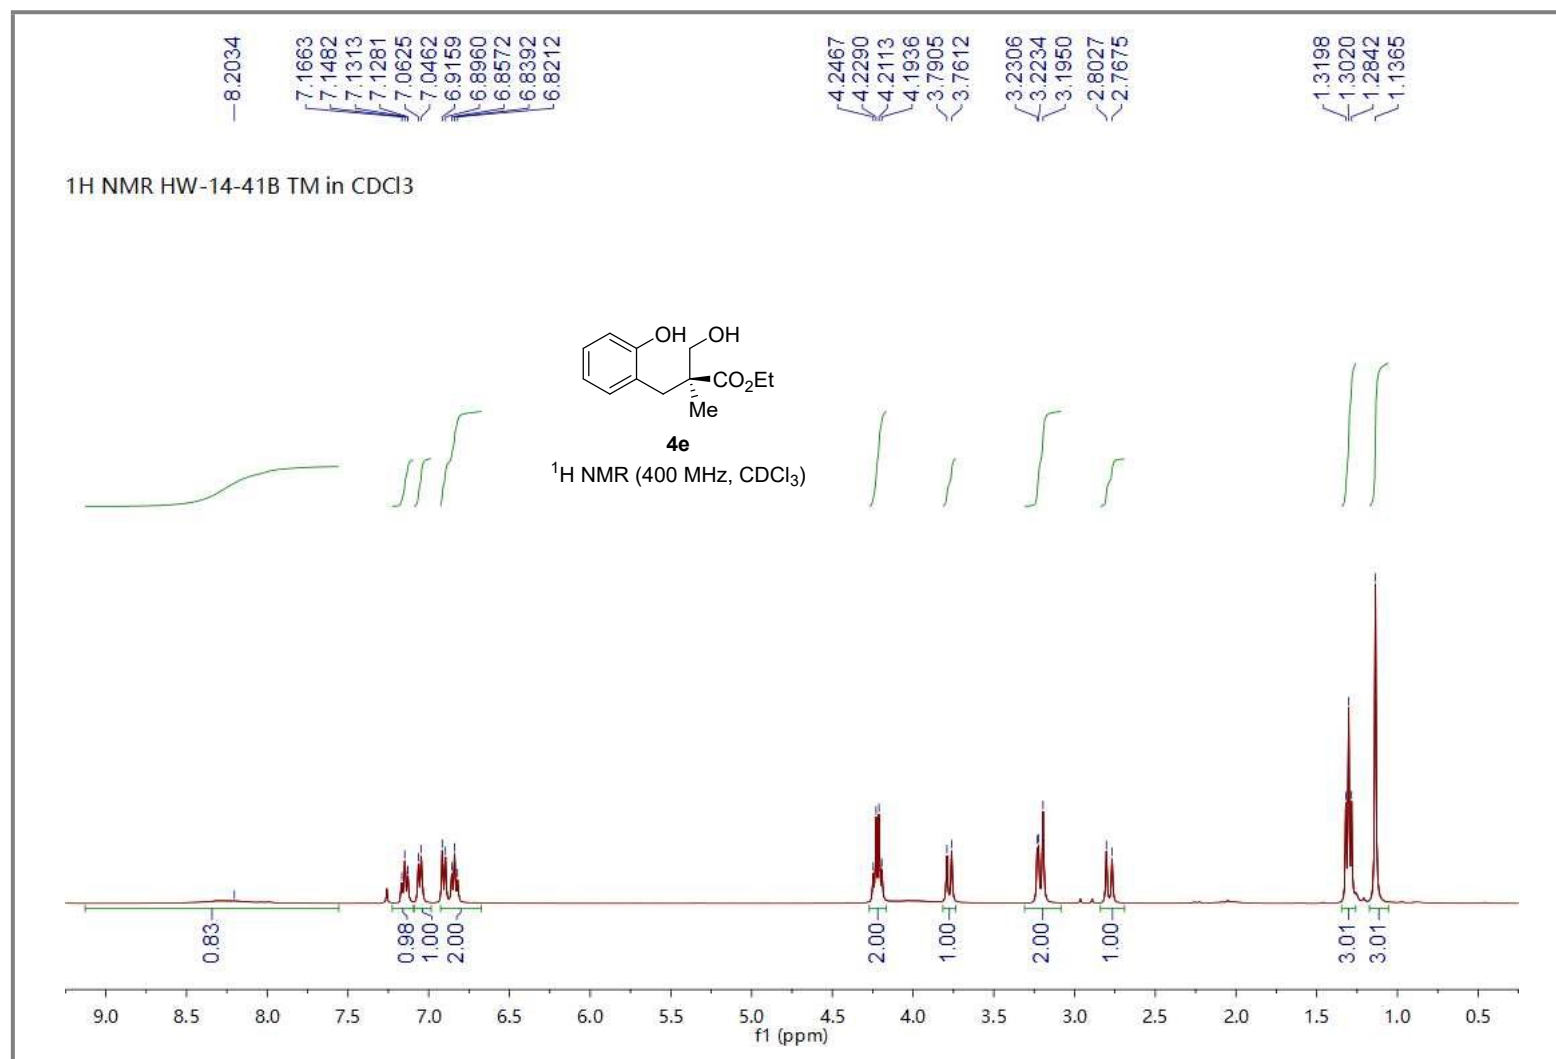

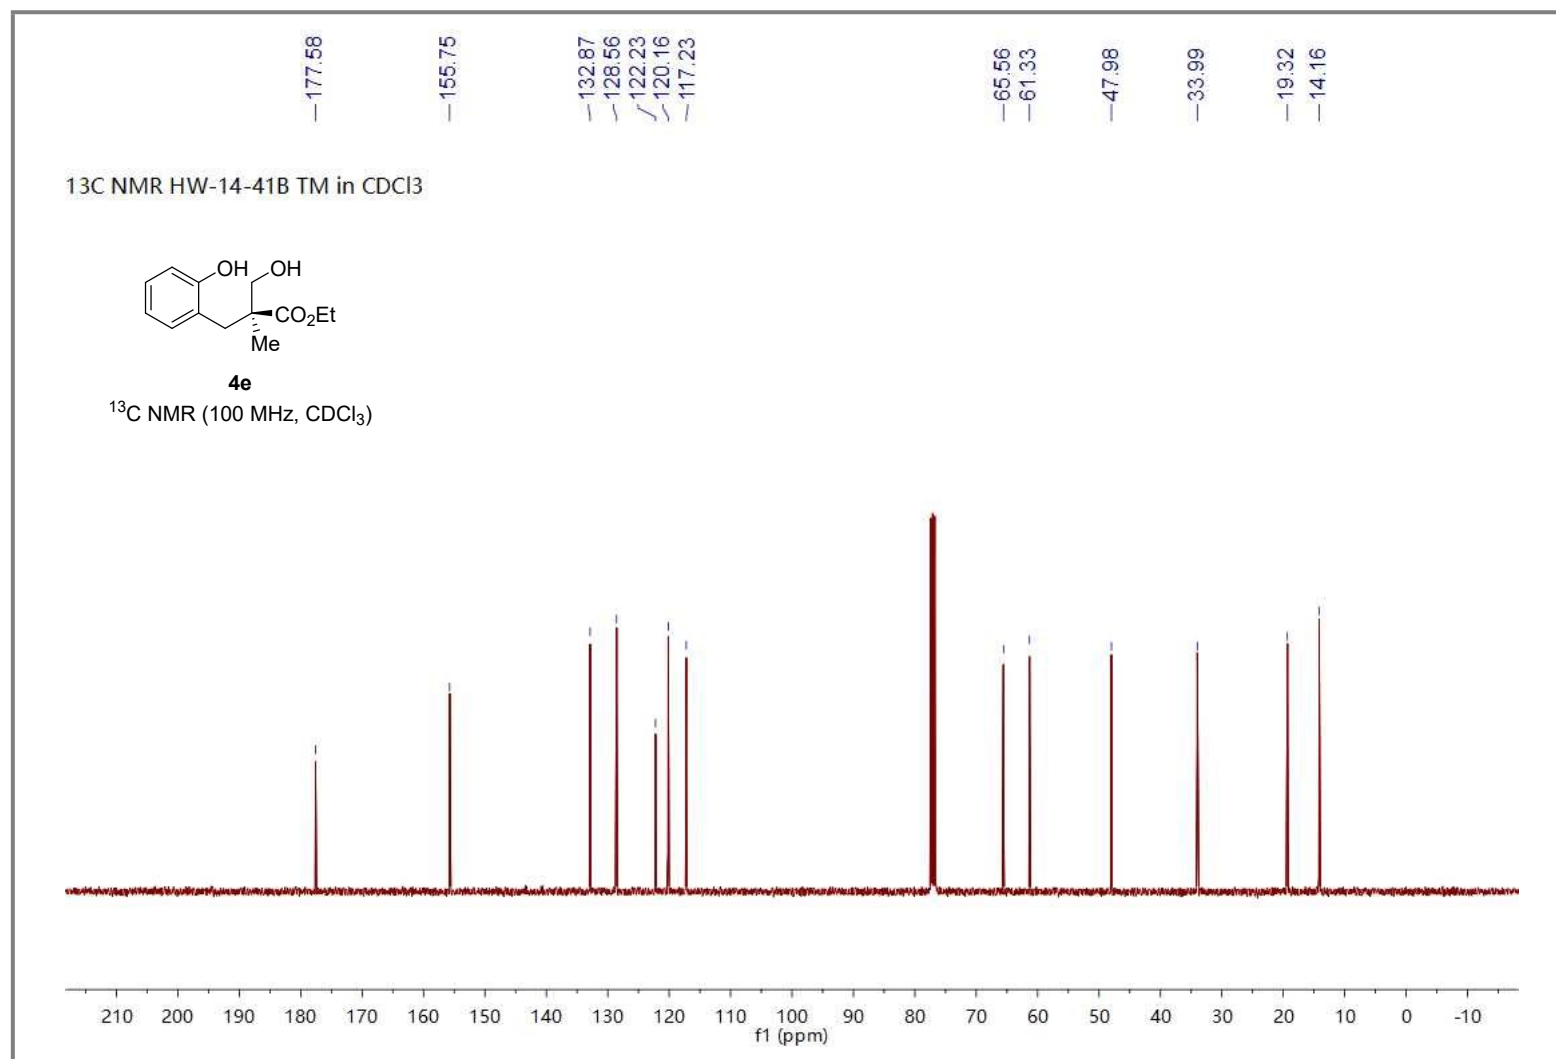

Data File C:\CHEM32\1\DATA\ZHOU-23\YZN022975.D  
 Sample Name: HW-14-41B TH+/-

=====  
 Acq. Operator :  
 Acq. Instrument : Instrument 1 Location : -  
 Injection Date : 4/26/2023 4:21:26 AM  
 Acq. Method : C:\CHEM32\1\METHODS\DEF\_LC.M  
 Last changed : 4/26/2023 4:19:55 AM  
 (modified after loading)  
 Analysis Method : C:\CHEM32\1\METHODS\DEF\_LC.M  
 Last changed : 10/17/2023 9:17:42 AM  
 (modified after loading)  
 Sample Info : IB, Hexane/i-PrOH = 95/5, 0.8 mL/min, 30 oC, 230 nm

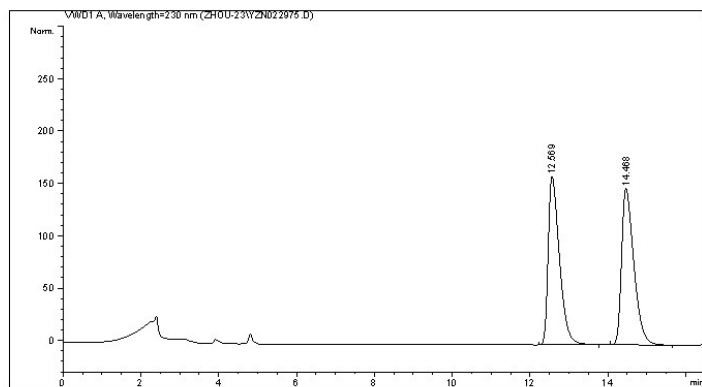

=====  
 Area Percent Report  
 =====

Sorted By : Signal  
 Multiplier: : 1.0000  
 Dilution: : 1.0000  
 Use Multiplier & Dilution Factor with ISTDs

Signal 1: VWD1 A, Wavelength=230 nm

| Peak # | RetTime [min] | Type | Width [min] | Area [mAU*s] | Height [mAU] | Area %  |
|--------|---------------|------|-------------|--------------|--------------|---------|
| 1      | 12.569        | BB   | 0.3056      | 3226.27905   | 160.67441    | 49.6838 |
| 2      | 14.468        | BB   | 0.3342      | 3267.35059   | 149.16887    | 50.3162 |

Totals : 6493.62964 309.84328

=====  
 \*\*\* End of Report \*\*\*

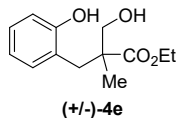

Data File C:\CHEM32\1\DATA\ZHOU-23\YZN022976.D  
 Sample Name: HW-14-41B TH

=====  
 Acq. Operator :  
 Acq. Instrument : Instrument 1 Location : -  
 Injection Date : 4/26/2023 4:42:32 AM  
 Acq. Method : C:\CHEM32\1\METHODS\DEF\_LC.M  
 Last changed : 4/26/2023 4:41:54 AM  
 (modified after loading)  
 Analysis Method : C:\CHEM32\1\METHODS\DEF\_LC.M  
 Last changed : 10/17/2023 9:17:42 AM  
 (modified after loading)  
 Sample Info : IB, Hexane/i-PrOH = 95/5, 0.8 mL/min, 30 oC, 230 nm

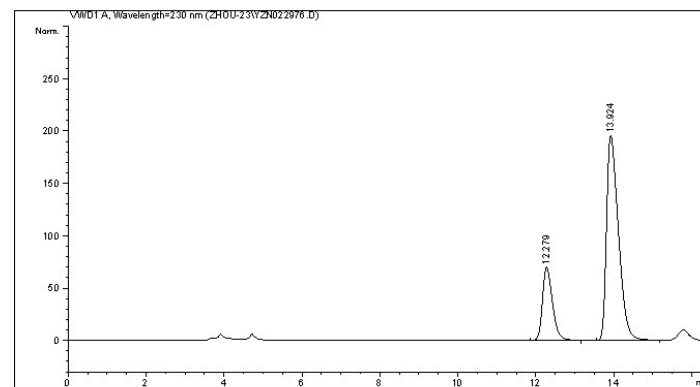

=====  
 Area Percent Report  
 =====

Sorted By : Signal  
 Multiplier: : 1.0000  
 Dilution: : 1.0000  
 Use Multiplier & Dilution Factor with ISTDs

Signal 1: VWD1 A, Wavelength=230 nm

| Peak # | RetTime [min] | Type | Width [min] | Area [mAU*s] | Height [mAU] | Area %  |
|--------|---------------|------|-------------|--------------|--------------|---------|
| 1      | 12.279        | BB   | 0.2725      | 1238.63635   | 69.80949     | 23.0816 |
| 2      | 13.924        | BB   | 0.3279      | 4127.69531   | 195.49022    | 76.9184 |

Totals : 5366.33167 265.29971

=====  
 \*\*\* End of Report \*\*\*

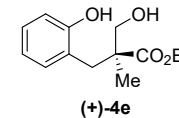



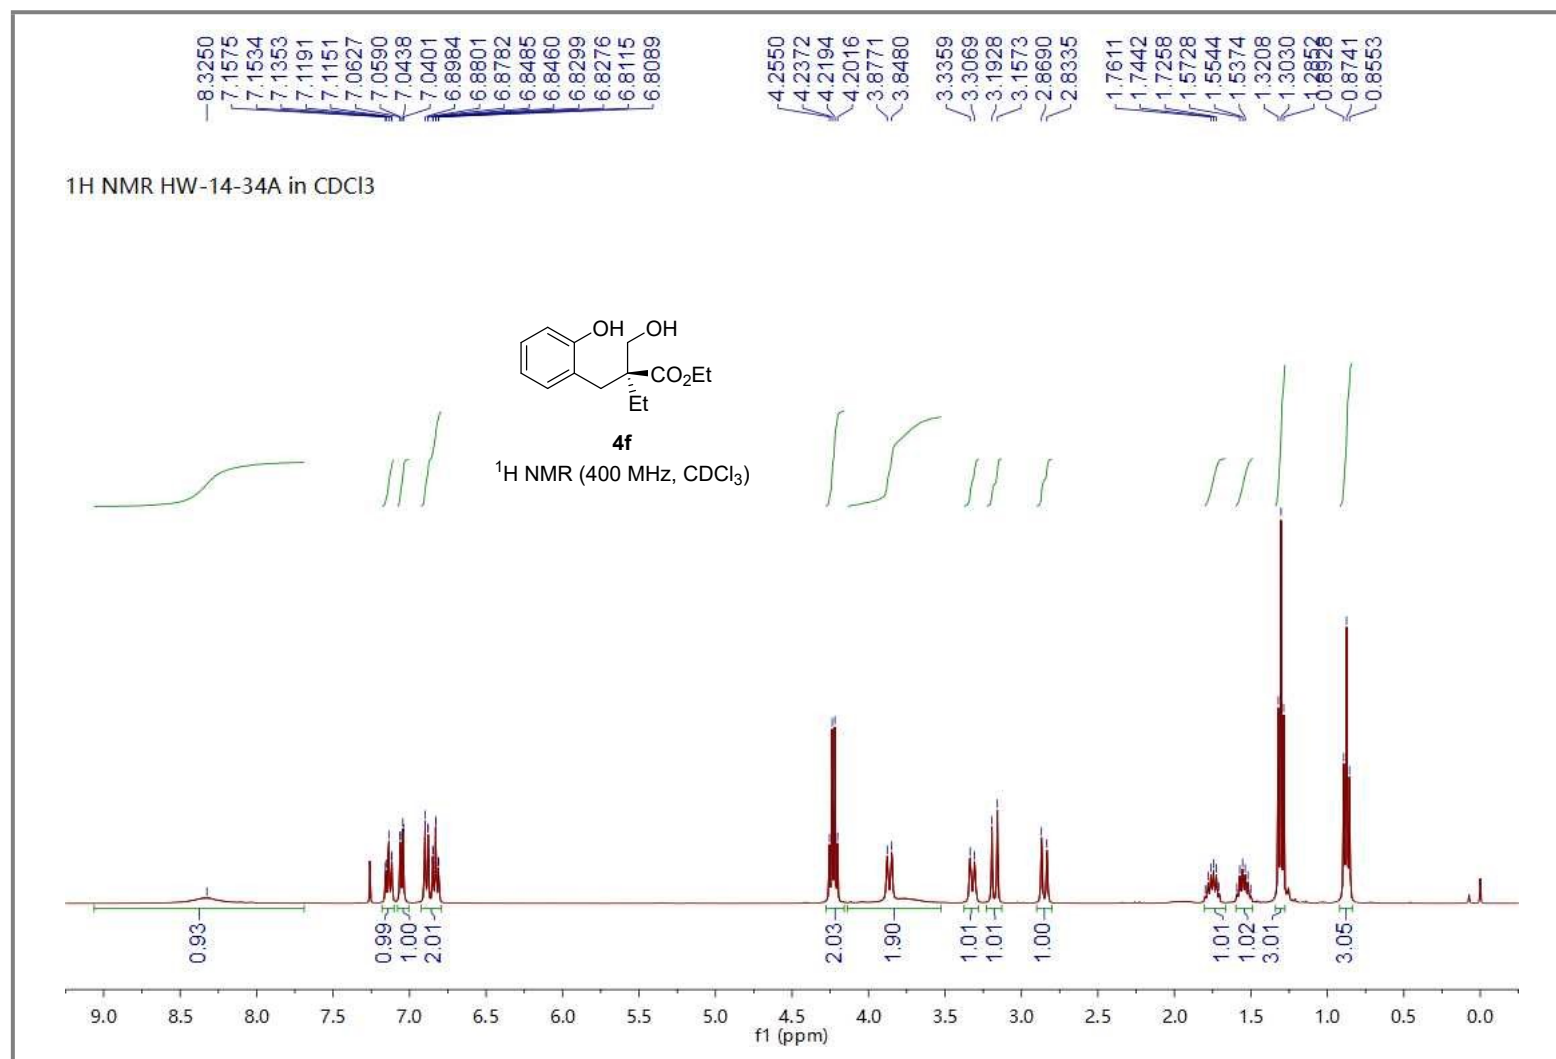

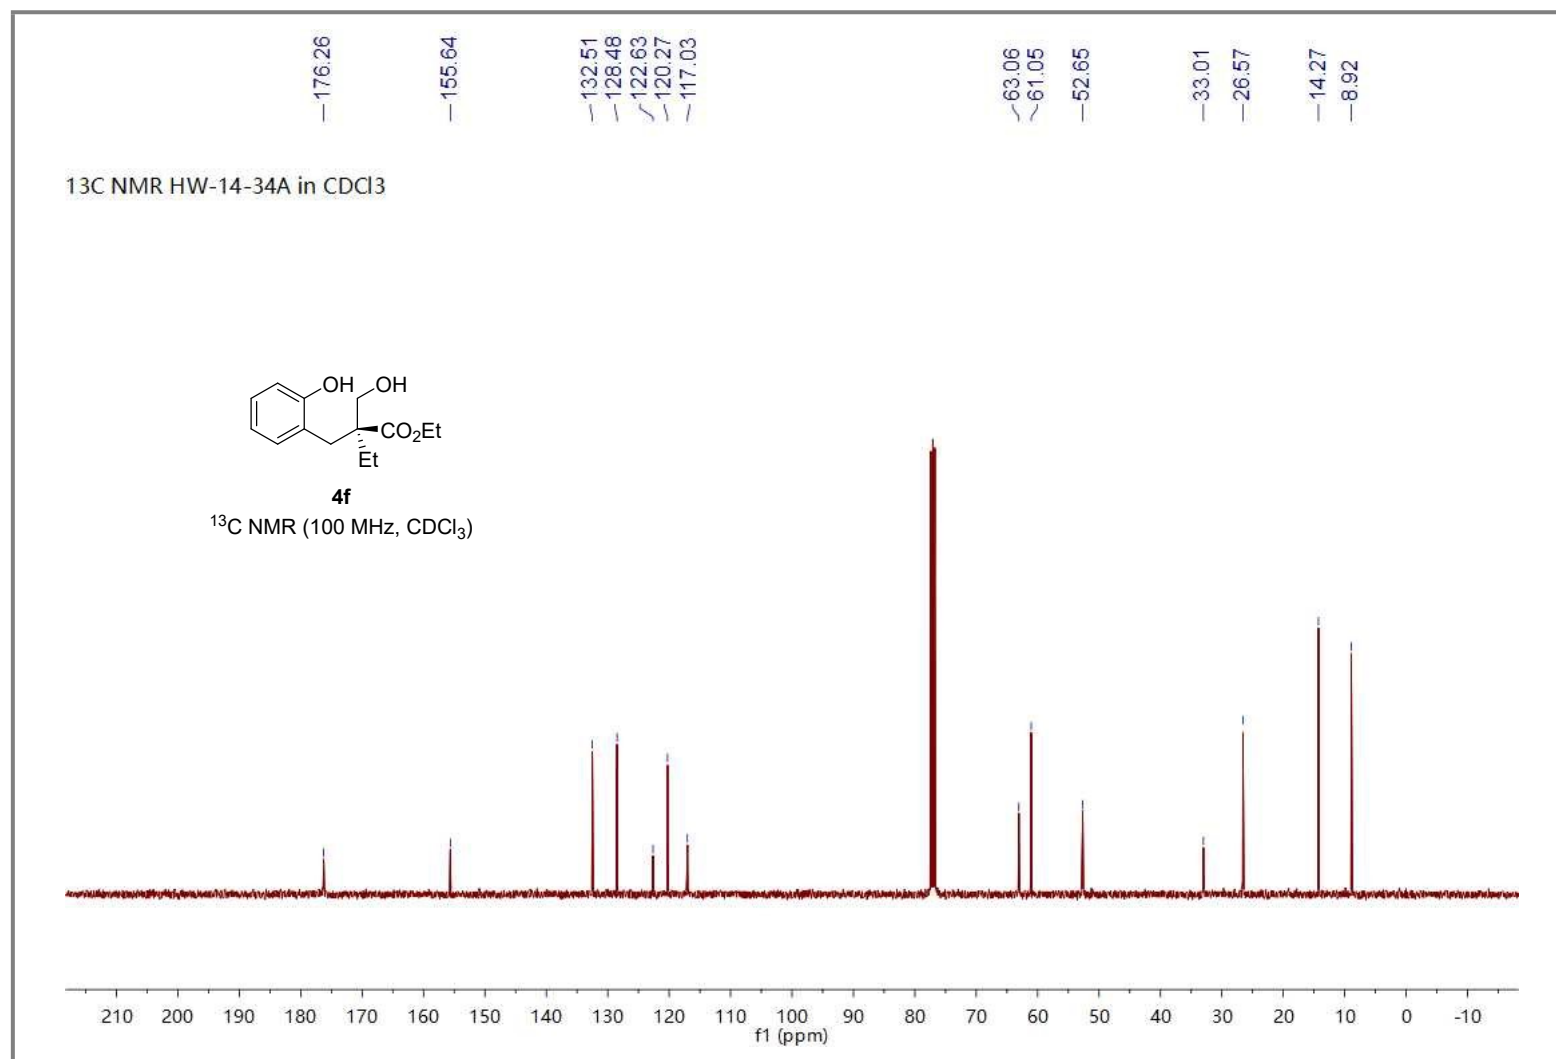

Data File C:\CHEM32\1\DATA\ZHOU-23\YZN022949.D  
Sample Name: HW-14-32A TH+/-

=====  
Acq. Operator :  
Acq. Instrument : Instrument 1 Location : -  
Injection Date : 4/23/2023 2:11:37 AM  
Acq. Method : C:\CHEM32\1\METHODS\DEF\_LC.M  
Last changed : 4/23/2023 1:59:02 AM  
(modified after loading)  
Analysis Method : C:\CHEM32\1\METHODS\DEF\_LC.M  
Last changed : 10/18/2023 8:07:03 AM  
(modified after loading)  
Sample Info : IB, Hexane/i-PrOH = 95/5, 0.8 mL/min, 30 oC, 230 nm

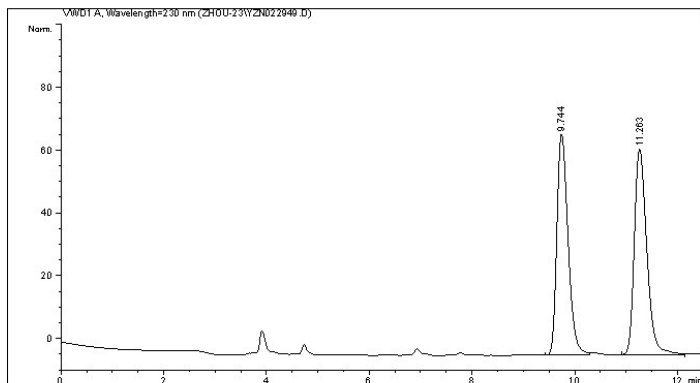

=====  
Area Percent Report  
=====

Sorted By : Signal  
Multiplier: : 1.0000  
Dilution: : 1.0000  
Use Multiplier & Dilution Factor with ISTDs

Signal 1: VWD1 A, Wavelength=230 nm

| Peak # | RetTime [min] | Type | Width [min] | Area [mAU] | Height [mAU] | Area %  |
|--------|---------------|------|-------------|------------|--------------|---------|
| 1      | 9.744         | BV   | 0.2347      | 1063.41235 | 70.32623     | 49.1143 |
| 2      | 11.263        | BB   | 0.2591      | 1101.76733 | 65.43362     | 50.8857 |

Totals : 2165.17969 135.75985

=====  
\*\*\* End of Report \*\*\*

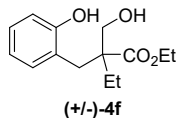

Data File C:\CHEM32\1\DATA\ZHOU-23\YZN022950.D  
Sample Name: HW-14-32A TH

=====  
Acq. Operator :  
Acq. Instrument : Instrument 1 Location : -  
Injection Date : 4/23/2023 2:26:56 AM  
Acq. Method : C:\CHEM32\1\METHODS\DEF\_LC.M  
Last changed : 4/23/2023 2:25:56 AM  
(modified after loading)  
Analysis Method : C:\CHEM32\1\METHODS\DEF\_LC.M  
Last changed : 10/18/2023 8:08:15 AM  
(modified after loading)  
Sample Info : IB, Hexane/i-PrOH = 95/5, 0.8 mL/min, 30 oC, 230 nm

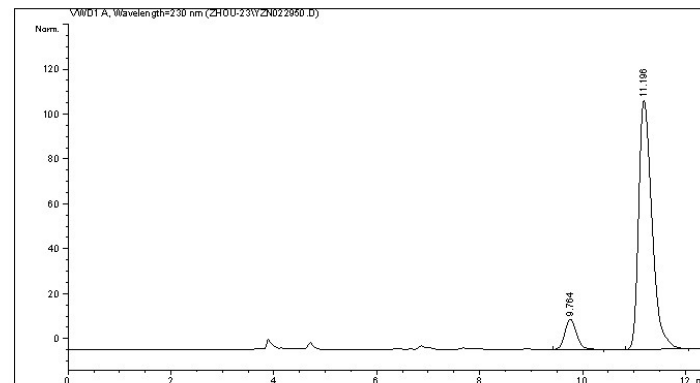

=====  
Area Percent Report  
=====

Sorted By : Signal  
Multiplier: : 1.0000  
Dilution: : 1.0000  
Use Multiplier & Dilution Factor with ISTDs

Signal 1: VWD1 A, Wavelength=230 nm

| Peak # | RetTime [min] | Type | Width [min] | Area [mAU] | Height [mAU] | Area %  |
|--------|---------------|------|-------------|------------|--------------|---------|
| 1      | 9.764         | BB   | 0.2472      | 215.87962  | 13.53471     | 9.7641  |
| 2      | 11.196        | BB   | 0.2783      | 1995.07495 | 110.88701    | 90.2359 |

Totals : 2210.95457 124.42172

=====  
\*\*\* End of Report \*\*\*

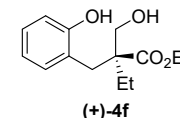

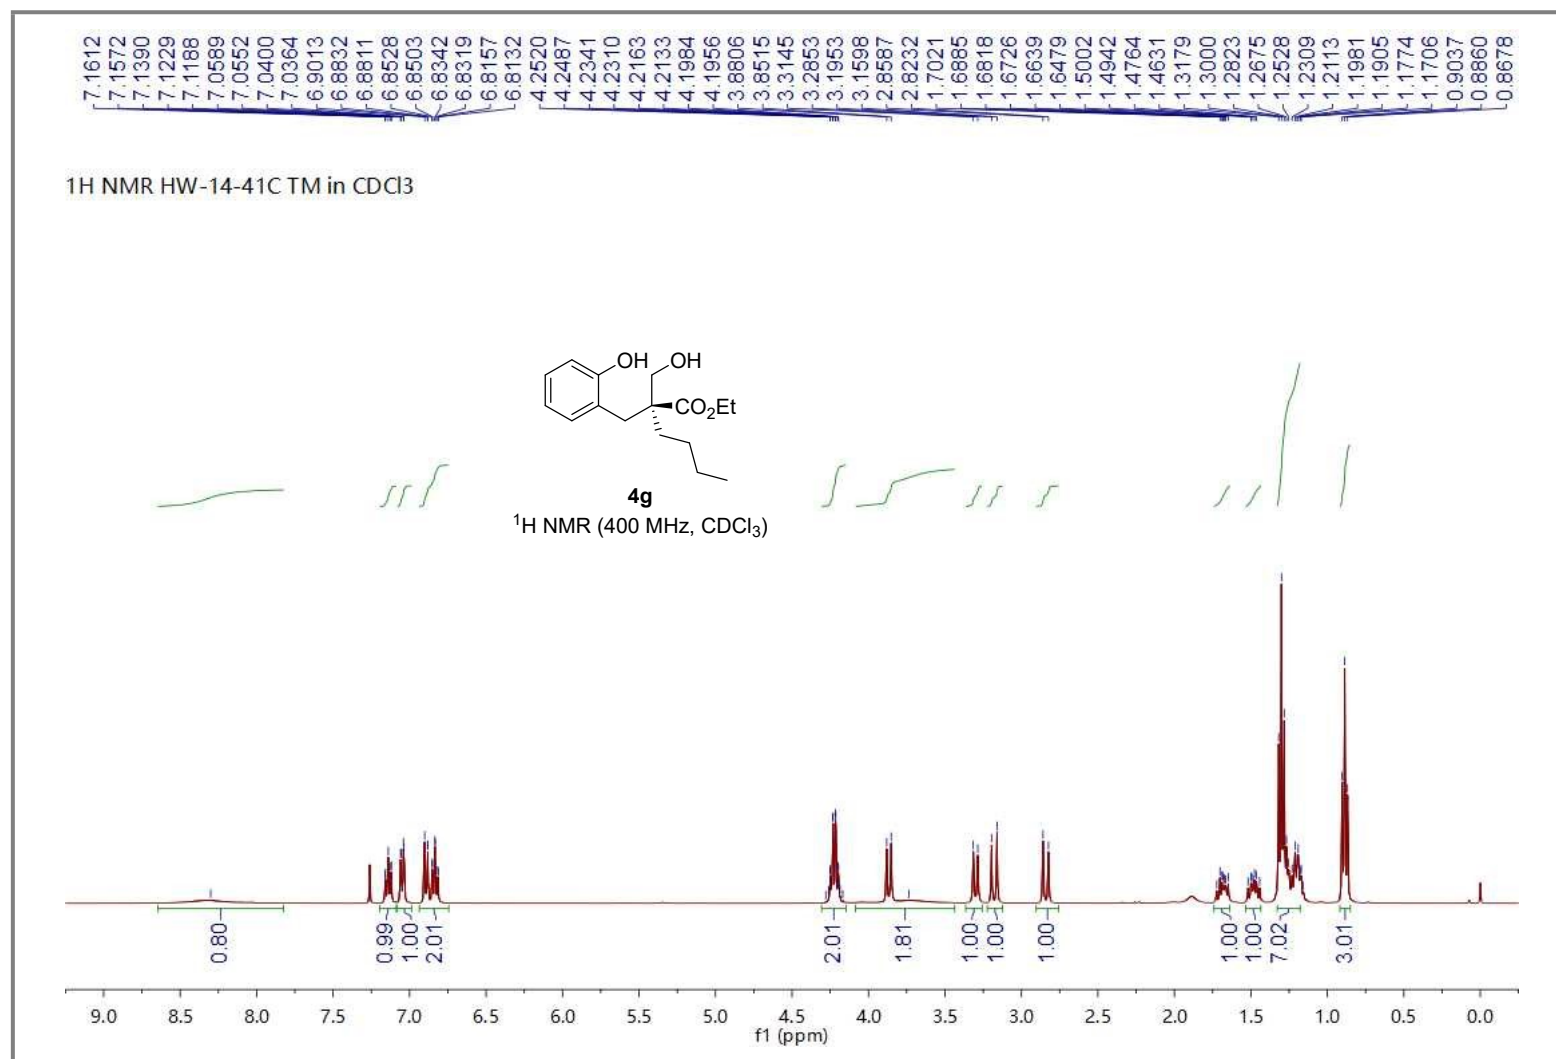

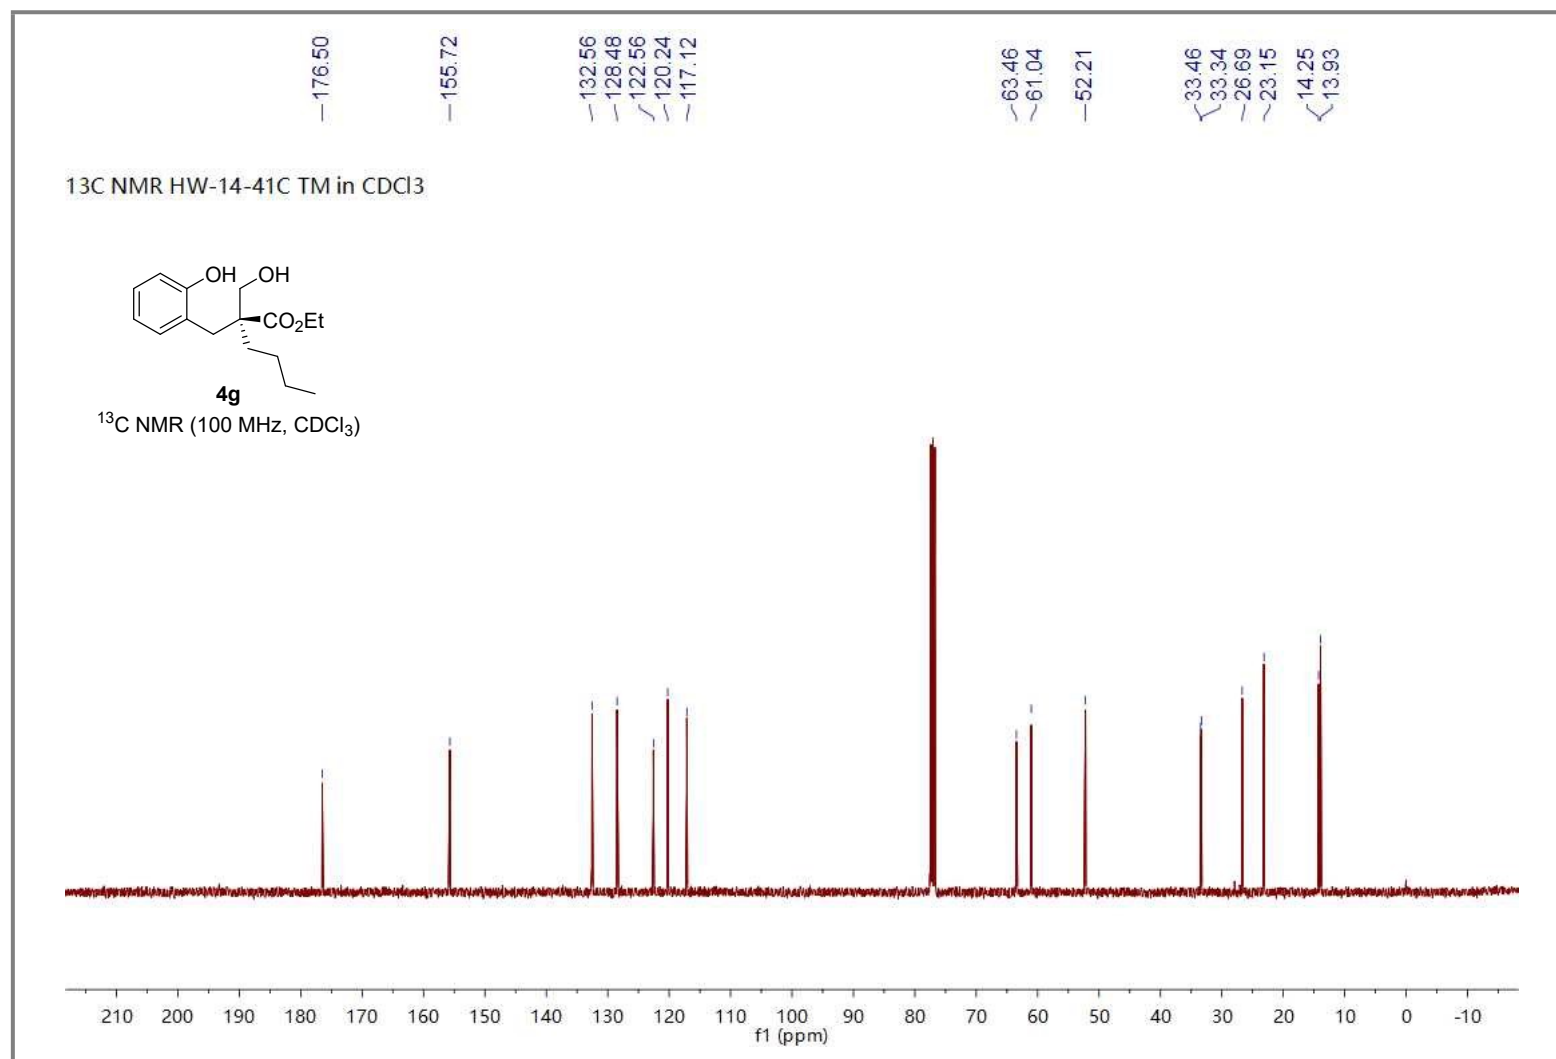

Data File C:\CHEM32\1\DATA\ZHOU-23\YZN022977.D  
Sample Name: HW-14-41C TH+/-

=====  
Acq. Operator :  
Acq. Instrument : Instrument 1 Location : -  
Injection Date : 4/26/2023 7:45:21 AM  
Acq. Method : C:\CHEM32\1\METHODS\DEF\_LC.M  
Last changed : 4/26/2023 7:29:44 AM  
(modified after loading)  
Analysis Method : C:\CHEM32\1\METHODS\DEF\_LC.M  
Last changed : 10/17/2023 9:22:15 AM  
(modified after loading)  
Sample Info : IB, Hexane/i-PrOH = 95/5, 0.8 mL/min, 30 oC, 230 nm

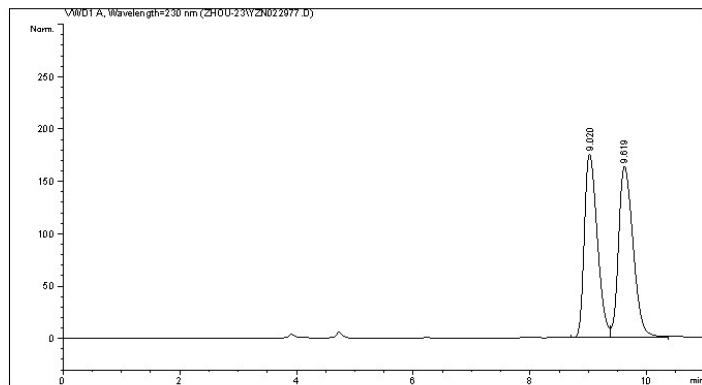

=====  
Area Percent Report  
=====

Sorted By : Signal  
Multiplier: : 1.0000  
Dilution: : 1.0000  
Use Multiplier & Dilution Factor with ISTDs

Signal 1: VWD1 A, Wavelength=230 nm

| Peak # | RetTime [min] | Type | Width [min] | Area [mAU] | Height [mAU] | Area %  |
|--------|---------------|------|-------------|------------|--------------|---------|
| 1      | 9.020         | BV   | 0.2407      | 2696.60937 | 175.18466    | 48.8336 |
| 2      | 9.619         | VB   | 0.2705      | 2825.43018 | 163.10492    | 51.1664 |

Totals : 5522.03955 338.28958

=====  
\*\*\* End of Report \*\*\*

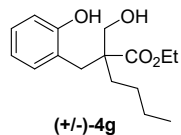

Instrument 1 10/17/2023 9:22:18 AM

Page 1 of 1

Data File C:\CHEM32\1\DATA\ZHOU-23\YZN022978.D  
Sample Name: HW-14-41C TH

=====  
Acq. Operator :  
Acq. Instrument : Instrument 1 Location : -  
Injection Date : 4/26/2023 8:05:34 AM  
Acq. Method : C:\CHEM32\1\METHODS\DEF\_LC.M  
Last changed : 4/26/2023 8:05:08 AM  
(modified after loading)  
Analysis Method : C:\CHEM32\1\METHODS\DEF\_LC.M  
Last changed : 10/17/2023 9:22:15 AM  
(modified after loading)  
Sample Info : IB, Hexane/i-PrOH = 95/5, 0.8 mL/min, 30 oC, 230 nm

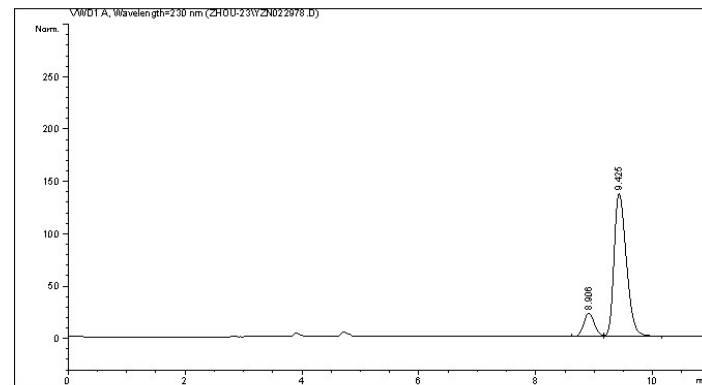

=====  
Area Percent Report  
=====

Sorted By : Signal  
Multiplier: : 1.0000  
Dilution: : 1.0000  
Use Multiplier & Dilution Factor with ISTDs

Signal 1: VWD1 A, Wavelength=230 nm

| Peak # | RetTime [min] | Type | Width [min] | Area [mAU] | Height [mAU] | Area %  |
|--------|---------------|------|-------------|------------|--------------|---------|
| 1      | 8.906         | BV   | 0.2014      | 284.40286  | 22.05935     | 12.5159 |
| 2      | 9.425         | VB   | 0.2268      | 1987.93518 | 136.37880    | 87.4841 |

Totals : 2272.33804 158.43815

=====  
\*\*\* End of Report \*\*\*

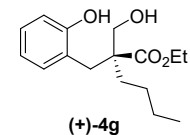

Instrument 1 10/17/2023 9:22:54 AM

Page 1 of 1

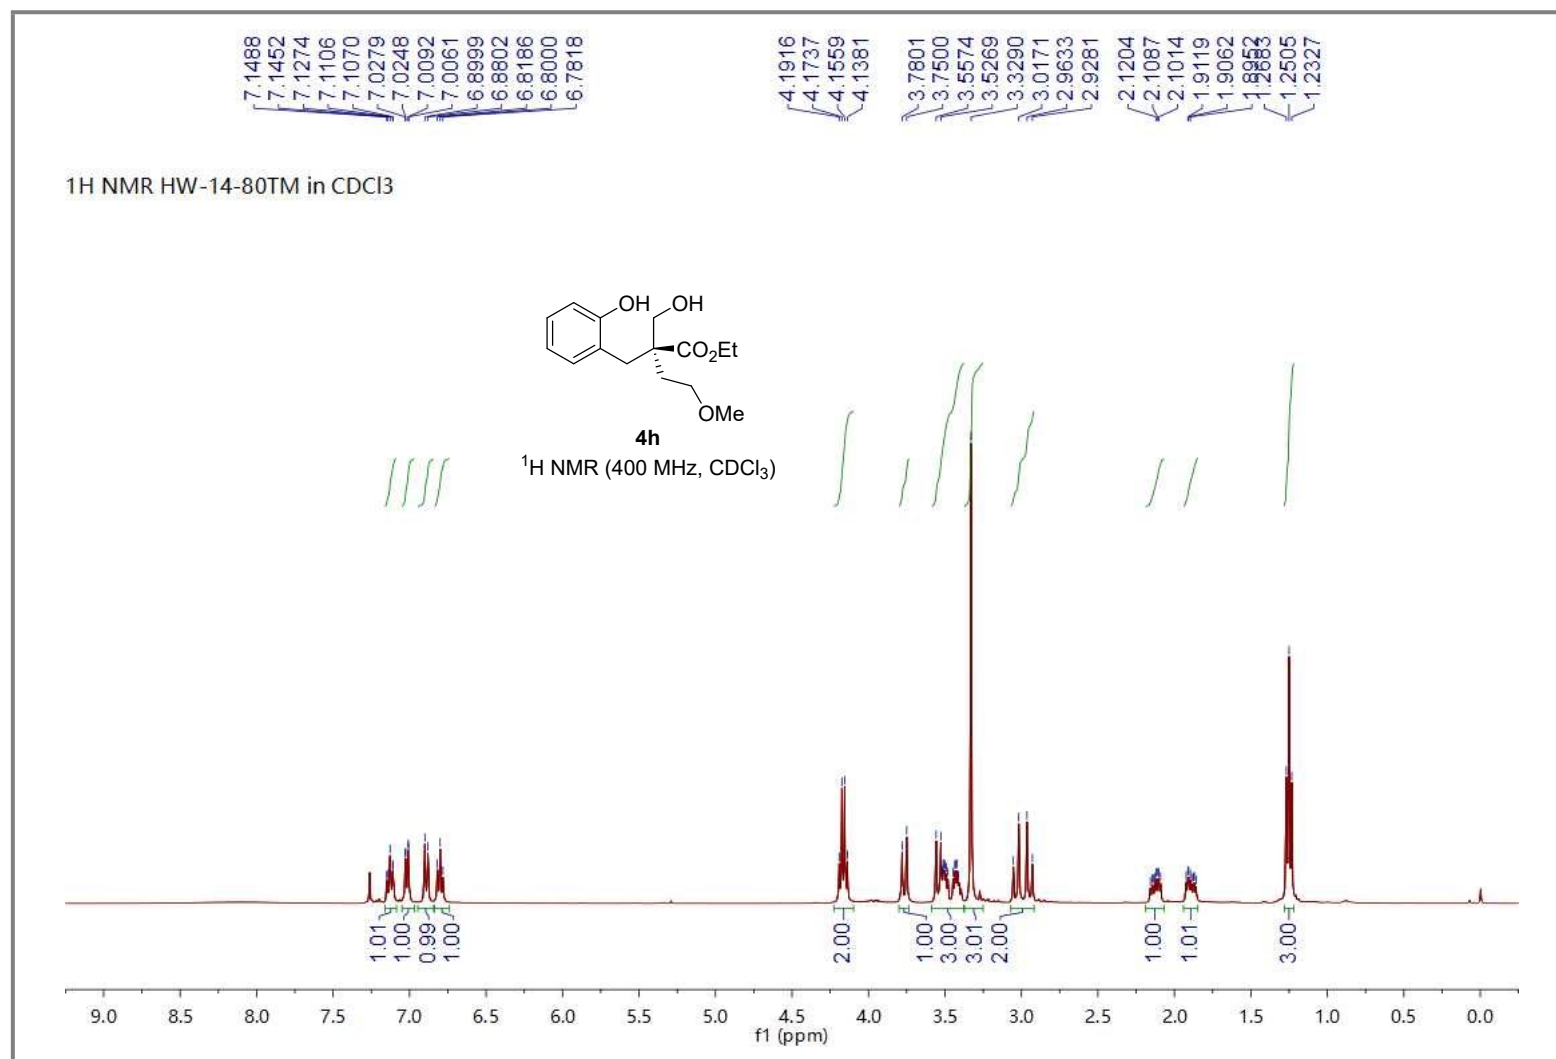

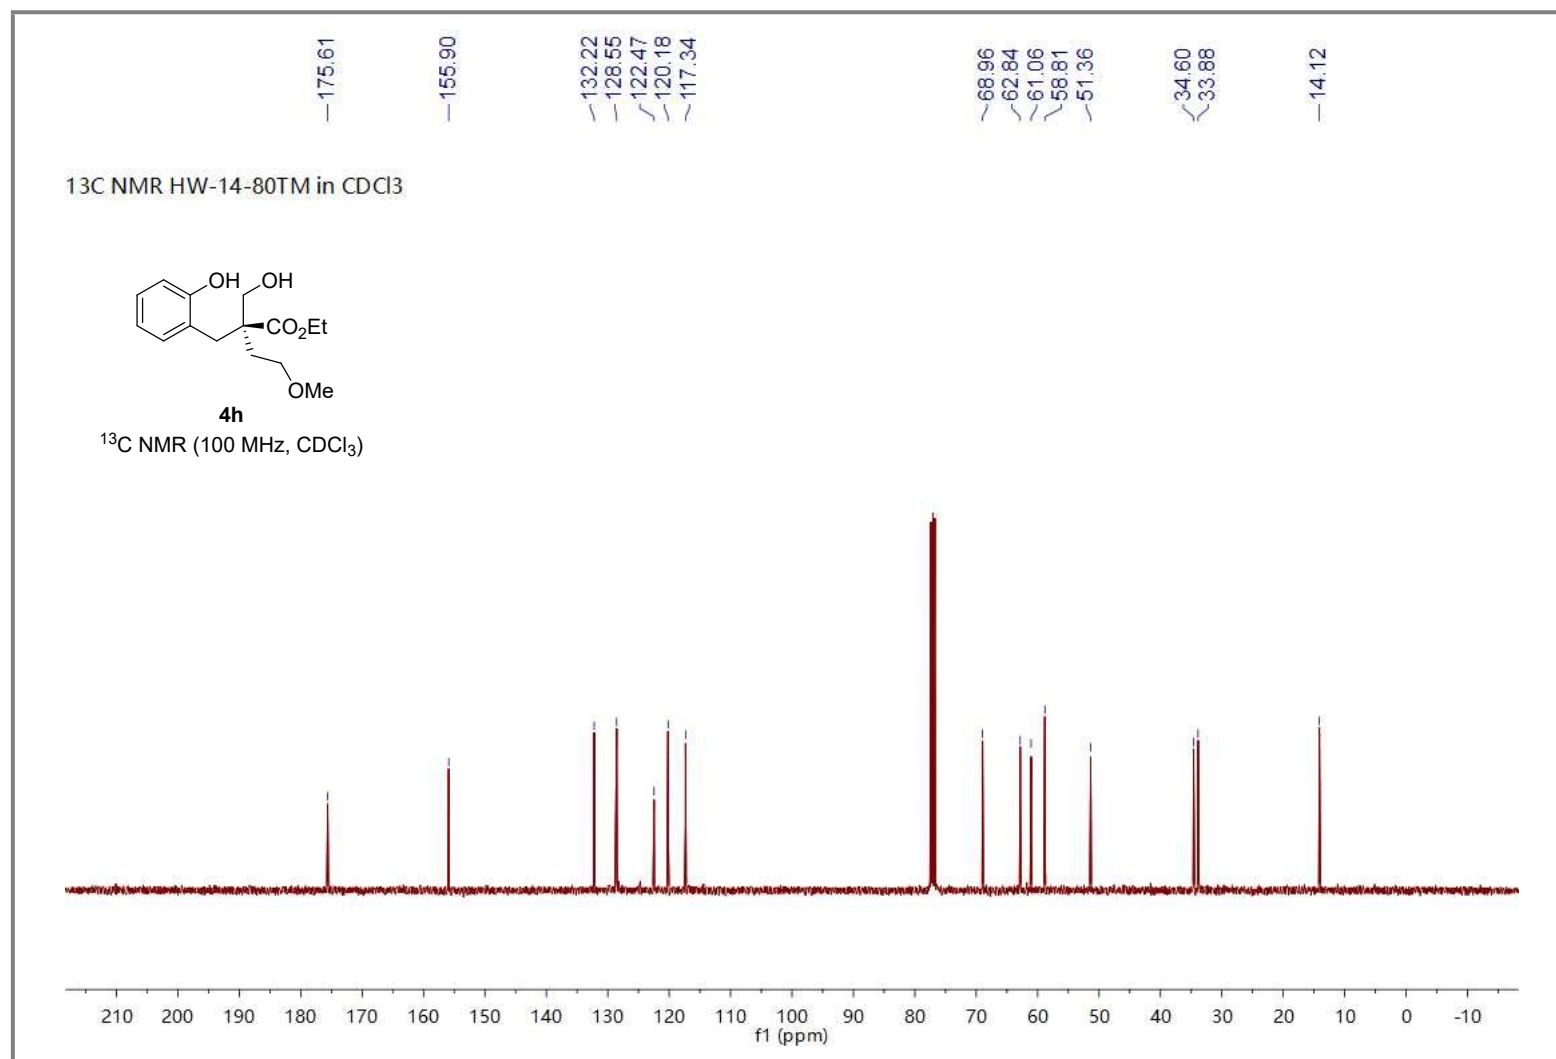



Data File C:\CHEM32\1\DATA\ZHOU-23\YZN023299.D  
 Sample Name: HW-14-80 TH+/-

=====  
 Acq. Operator :  
 Acq. Instrument : Instrument 1 Location : -  
 Injection Date : 6/13/2023 3:10:26 AM  
 Acq. Method : C:\CHEM32\1\METHODS\DEF\_LC.M  
 Last changed : 6/13/2023 3:09:51 AM  
 (modified after loading)  
 Analysis Method : C:\CHEM32\1\METHODS\DEF\_LC.M  
 Last changed : 10/17/2023 9:29:58 AM  
 (modified after loading)  
 Sample Info : IB, Hexane/i-PrOH = 95/5, 0.8 mL/min, 30 oC, 230 nm

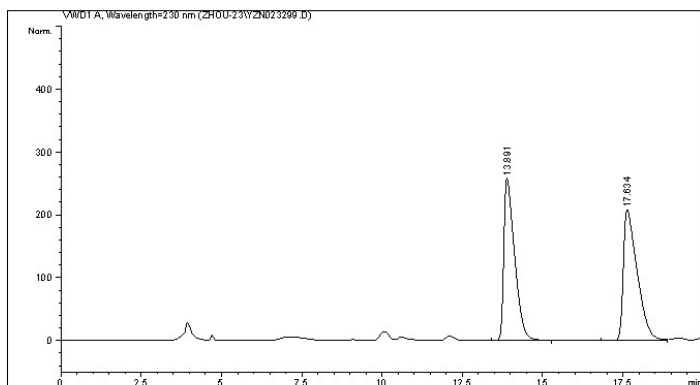

=====  
 Area Percent Report  
 =====

Sorted By : Signal  
 Multiplier: : 1.0000  
 Dilution: : 1.0000  
 Use Multiplier & Dilution Factor with ISTDs

Signal 1: VWD1 A, Wavelength=230 nm

| Peak # | RetTime [min] | Type | Width [min] | Area [mAU] | Height [mAU] | Area %  |
|--------|---------------|------|-------------|------------|--------------|---------|
| 1      | 13.891        | BB   | 0.3526      | 6027.66406 | 258.00723    | 49.1641 |
| 2      | 17.634        | BV   | 0.4410      | 6232.62939 | 208.18640    | 50.8359 |

Totals : 1.22603e4 466.19363

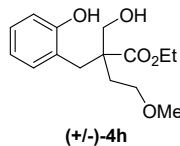

=====  
 \*\*\* End of Report \*\*\*

Data File C:\CHEM32\1\DATA\ZHOU-23\YZN023300.D  
 Sample Name: HW-14-80 TH

=====  
 Acq. Operator :  
 Acq. Instrument : Instrument 1 Location : -  
 Injection Date : 6/13/2023 3:38:30 AM  
 Acq. Method : C:\CHEM32\1\METHODS\DEF\_LC.M  
 Last changed : 6/13/2023 3:37:15 AM  
 (modified after loading)  
 Analysis Method : C:\CHEM32\1\METHODS\DEF\_LC.M  
 Last changed : 10/17/2023 9:30:47 AM  
 (modified after loading)  
 Sample Info : IB, Hexane/i-PrOH = 95/5, 0.8 mL/min, 30 oC, 230 nm

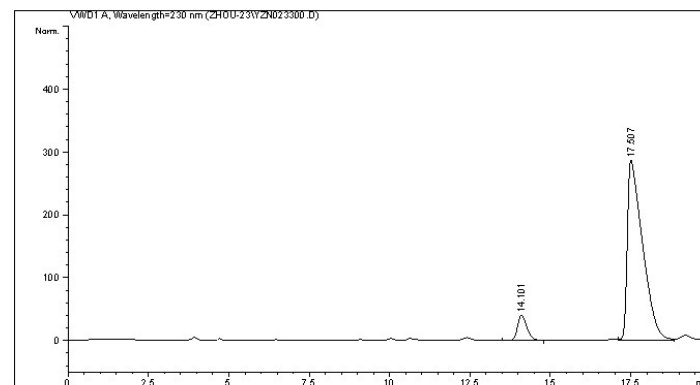

=====  
 Area Percent Report  
 =====

Sorted By : Signal  
 Multiplier: : 1.0000  
 Dilution: : 1.0000  
 Use Multiplier & Dilution Factor with ISTDs

Signal 1: VWD1 A, Wavelength=230 nm

| Peak # | RetTime [min] | Type | Width [min] | Area [mAU] | Height [mAU] | Area %  |
|--------|---------------|------|-------------|------------|--------------|---------|
| 1      | 14.101        | BB   | 0.3105      | 798.60327  | 39.68063     | 7.7841  |
| 2      | 17.507        | VV   | 0.4791      | 9460.86816 | 287.09534    | 92.2159 |

Totals : 1.02595e4 326.77596

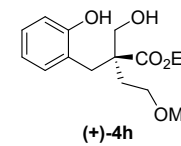

=====  
 \*\*\* End of Report \*\*\*

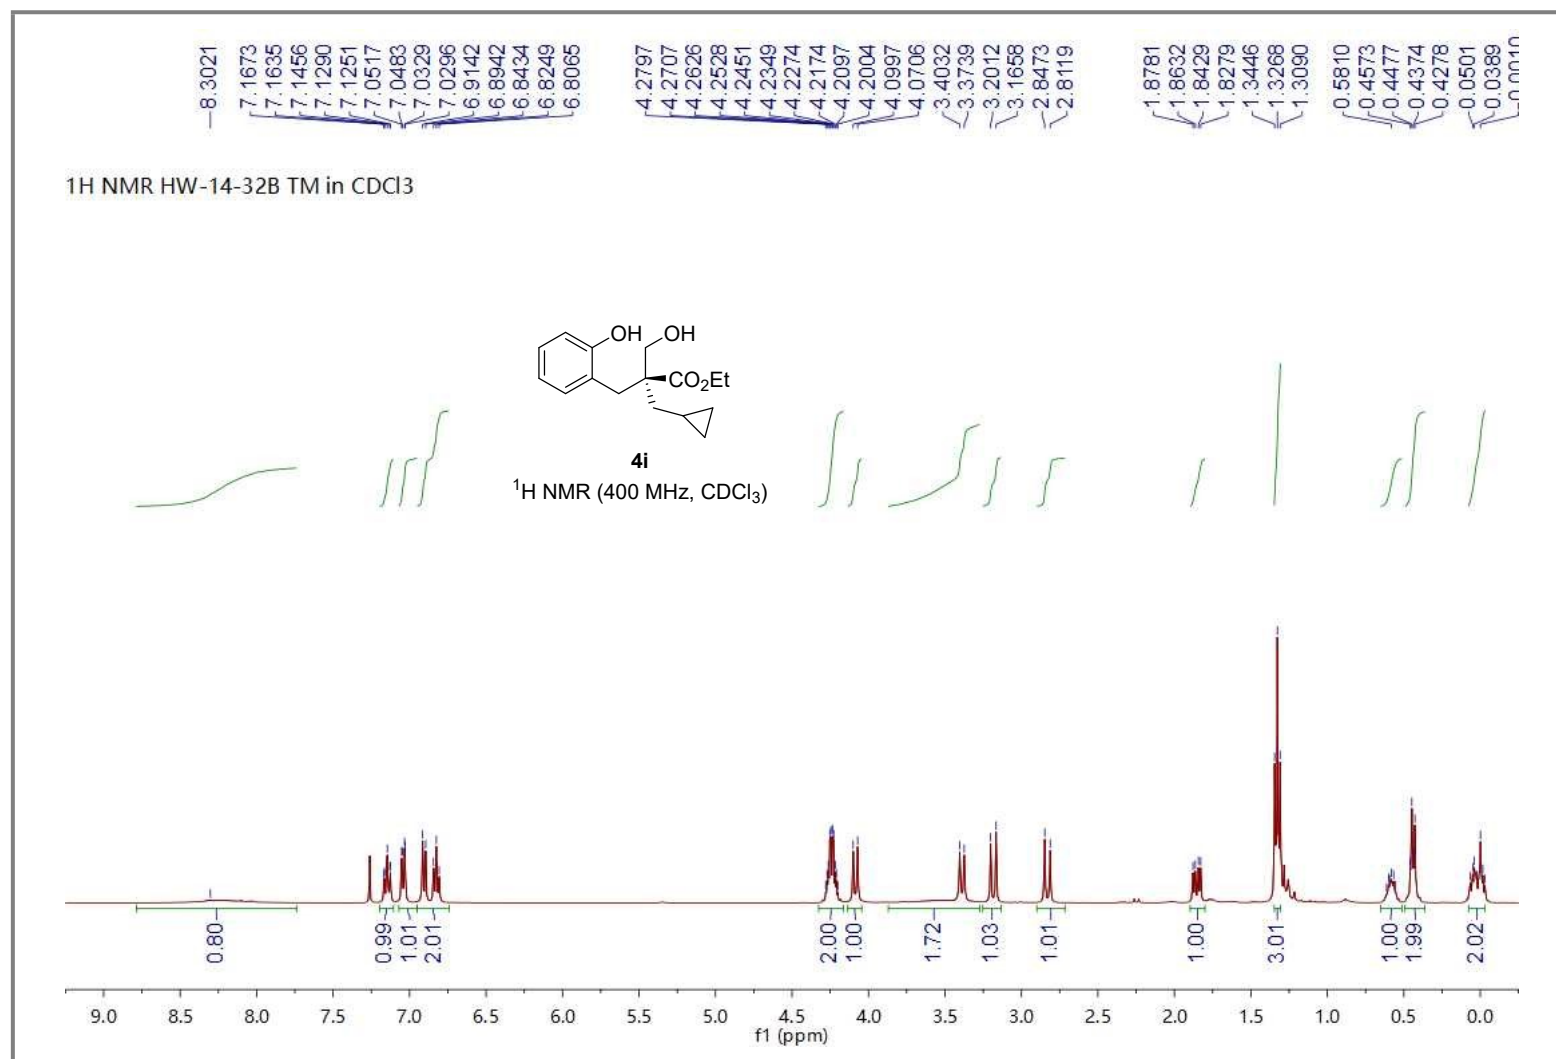

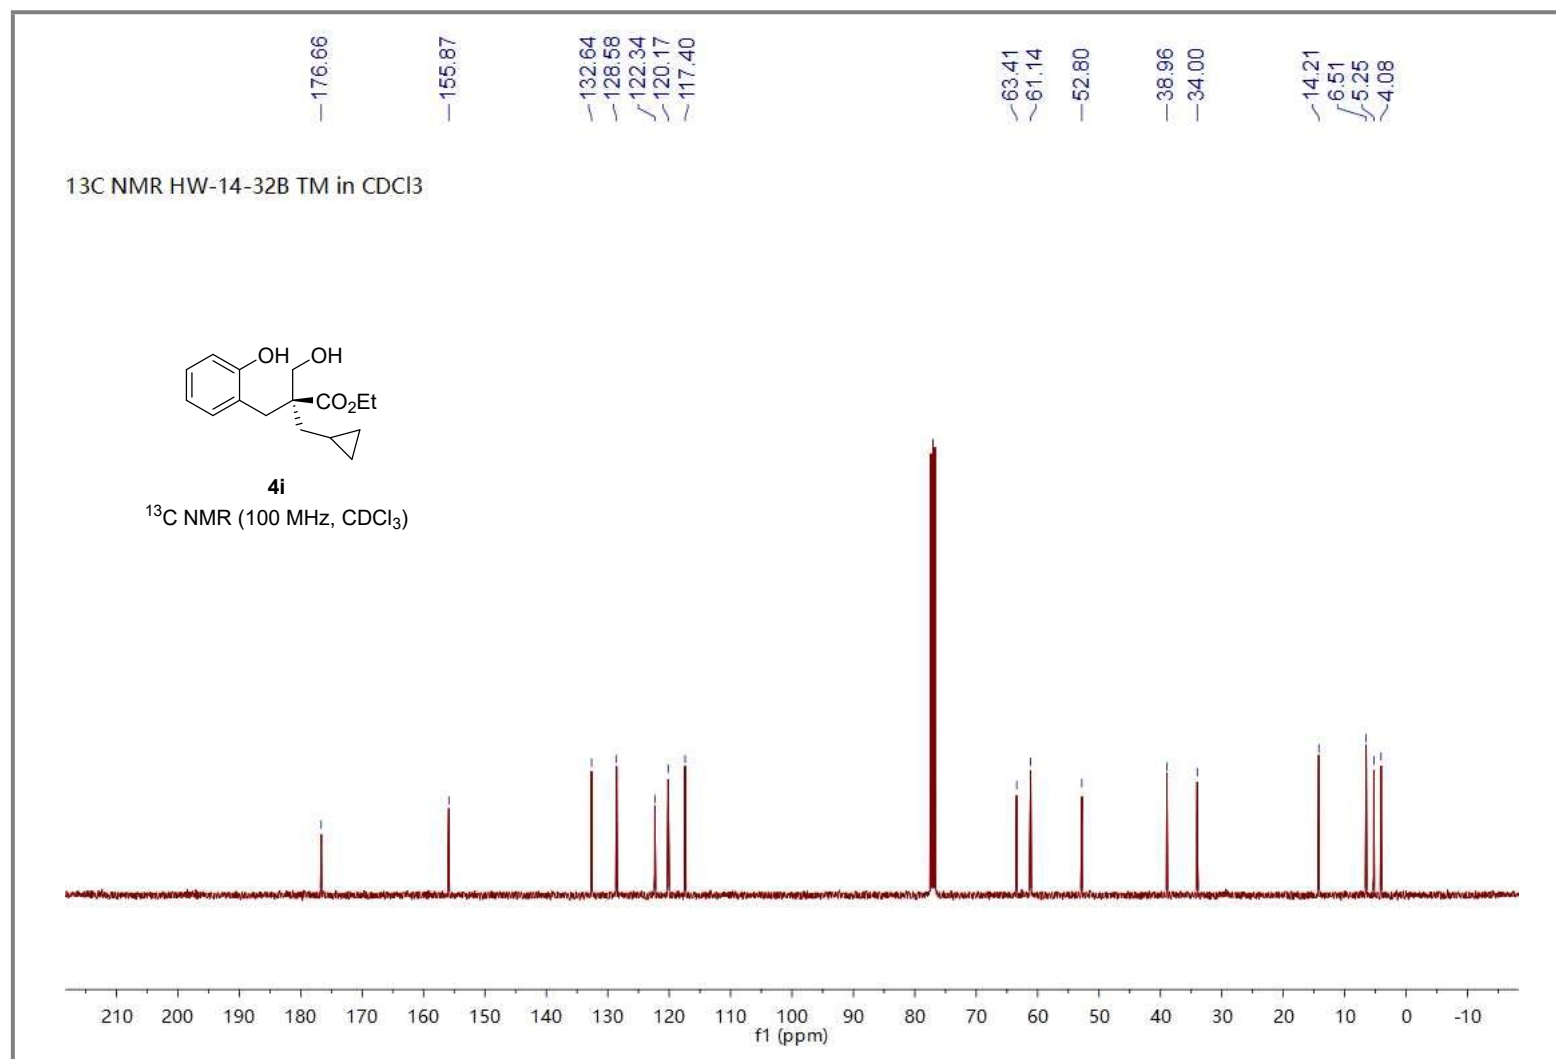

Data File C:\CHEM32\1\DATA\ZHOU-23\YZN022951.D  
 Sample Name: HW-14-32E TH+/-

=====  
 Acq. Operator :  
 Acq. Instrument : Instrument 1 Location : -  
 Injection Date : 4/23/2023 2:44:05 AM  
 Acq. Method : C:\CHEM32\1\METHODS\DEF\_LC.M  
 Last changed : 4/23/2023 2:42:40 AM  
 (modified after loading)  
 Analysis Method : C:\CHEM32\1\METHODS\DEF\_LC.M  
 Last changed : 10/17/2023 9:36:03 AM  
 (modified after loading)  
 Sample Info : IB, Hexane/i-PrOH = 95/5, 0.8 mL/min, 30 oC, 230 nm

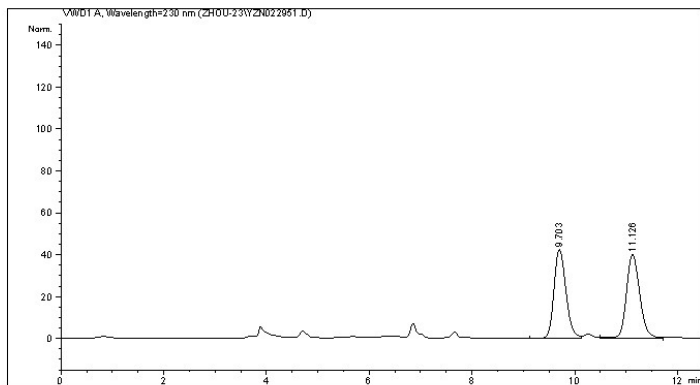

=====  
 Area Percent Report  
 =====

Sorted By : Signal  
 Multiplier: : 1.0000  
 Dilution: : 1.0000  
 Use Multiplier & Dilution Factor with ISTDs

Signal 1: VWD1 A, Wavelength=230 nm

| Peak # | RetTime [min] | Type | Width [min] | Area [mAU*s] | Height [mAU] | Area %  |
|--------|---------------|------|-------------|--------------|--------------|---------|
| 1      | 9.703         | VV   | 0.2542      | 691.68689    | 42.43552     | 48.3746 |
| 2      | 11.126        | VV   | 0.2850      | 738.16943    | 40.04108     | 51.6254 |

Totals : 1429.85632 82.47660

=====  
 \*\*\* End of Report \*\*\*

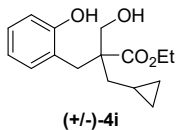

Data File C:\CHEM32\1\DATA\ZHOU-23\YZN023014.D  
 Sample Name: HW-14-47A TH

=====  
 Acq. Operator :  
 Acq. Instrument : Instrument 1 Location : -  
 Injection Date : 5/5/2023 5:59:42 AM  
 Acq. Method : C:\CHEM32\1\METHODS\DEF\_LC.M  
 Last changed : 5/5/2023 5:54:33 AM  
 (modified after loading)  
 Analysis Method : C:\CHEM32\1\METHODS\DEF\_LC.M  
 Last changed : 10/17/2023 9:37:14 AM  
 (modified after loading)  
 Sample Info : IB, Hexane/i-PrOH = 95/5, 0.8 mL/min, 30 oC, 230nm

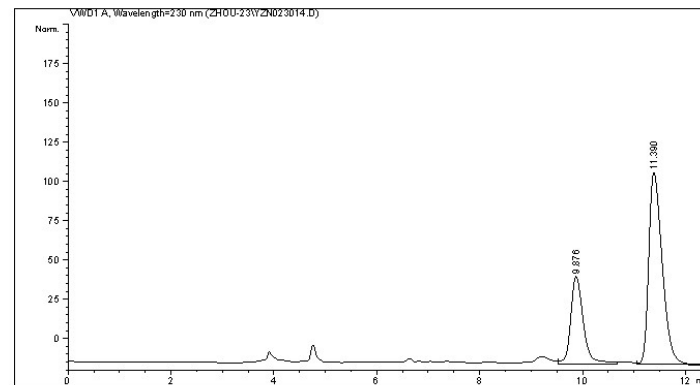

=====  
 Area Percent Report  
 =====

Sorted By : Signal  
 Multiplier: : 1.0000  
 Dilution: : 1.0000  
 Use Multiplier & Dilution Factor with ISTDs

Signal 1: VWD1 A, Wavelength=230 nm

| Peak # | RetTime [min] | Type | Width [min] | Area [mAU*s] | Height [mAU] | Area %  |
|--------|---------------|------|-------------|--------------|--------------|---------|
| 1      | 9.876         | VV   | 0.2597      | 961.53351    | 55.68395     | 30.2891 |
| 2      | 11.390        | VV   | 0.2760      | 2212.98486   | 121.84767    | 69.7109 |

Totals : 3174.51837 177.53162

=====  
 \*\*\* End of Report \*\*\*

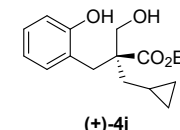

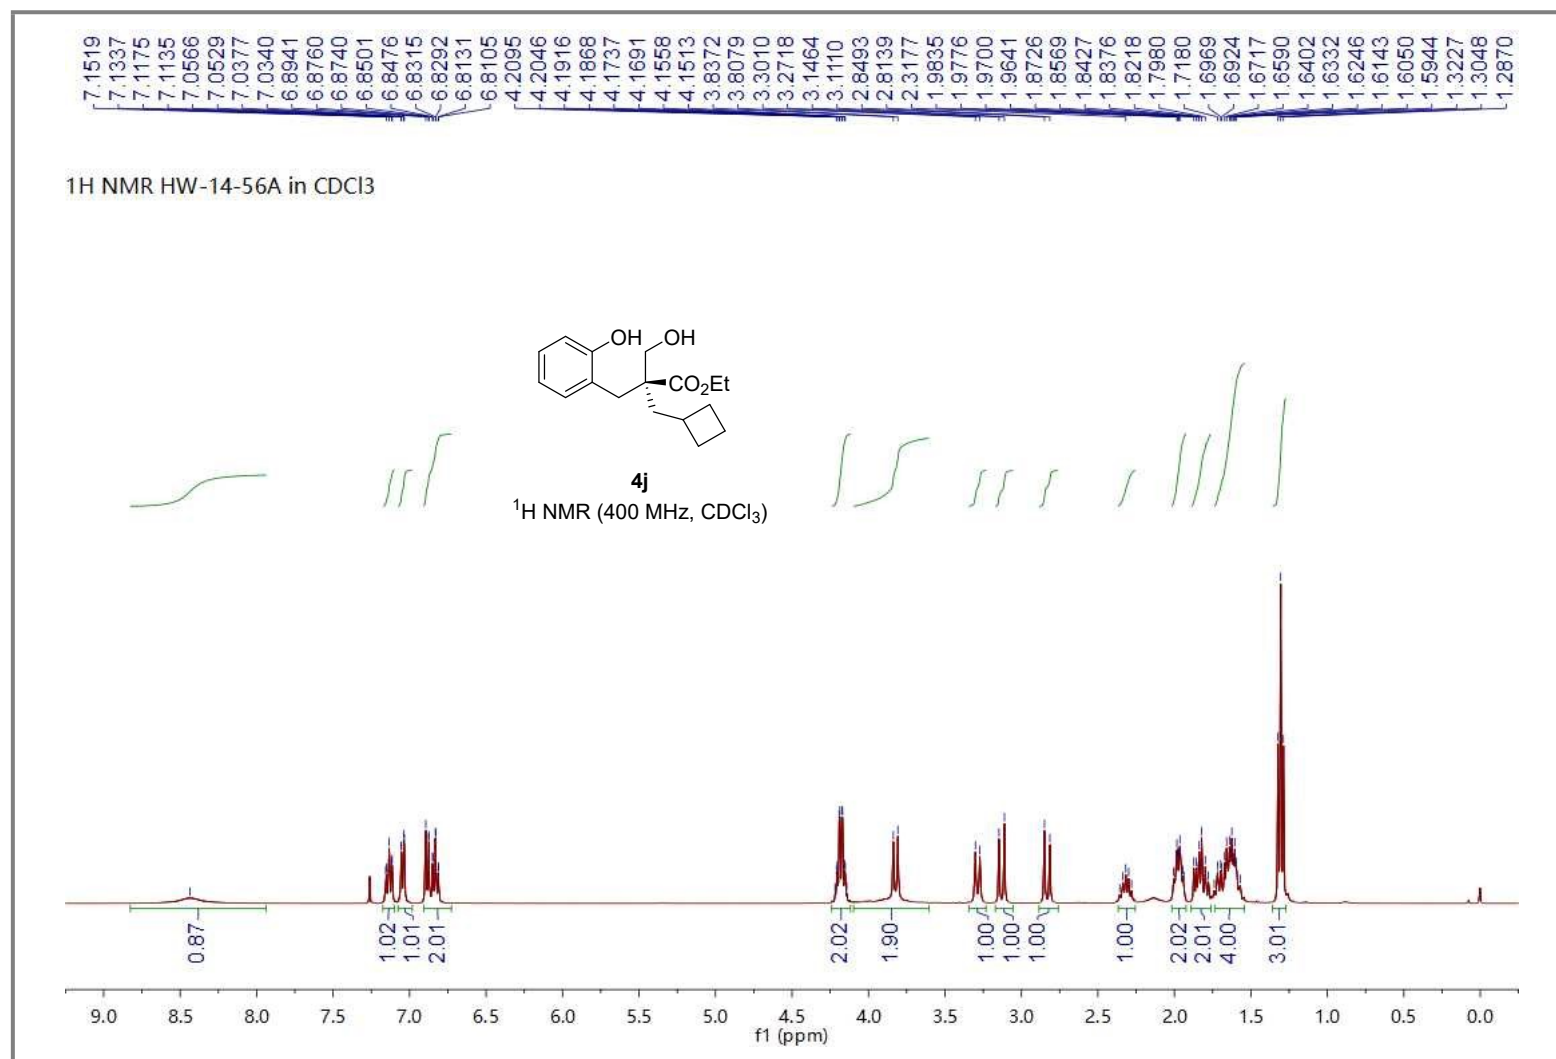

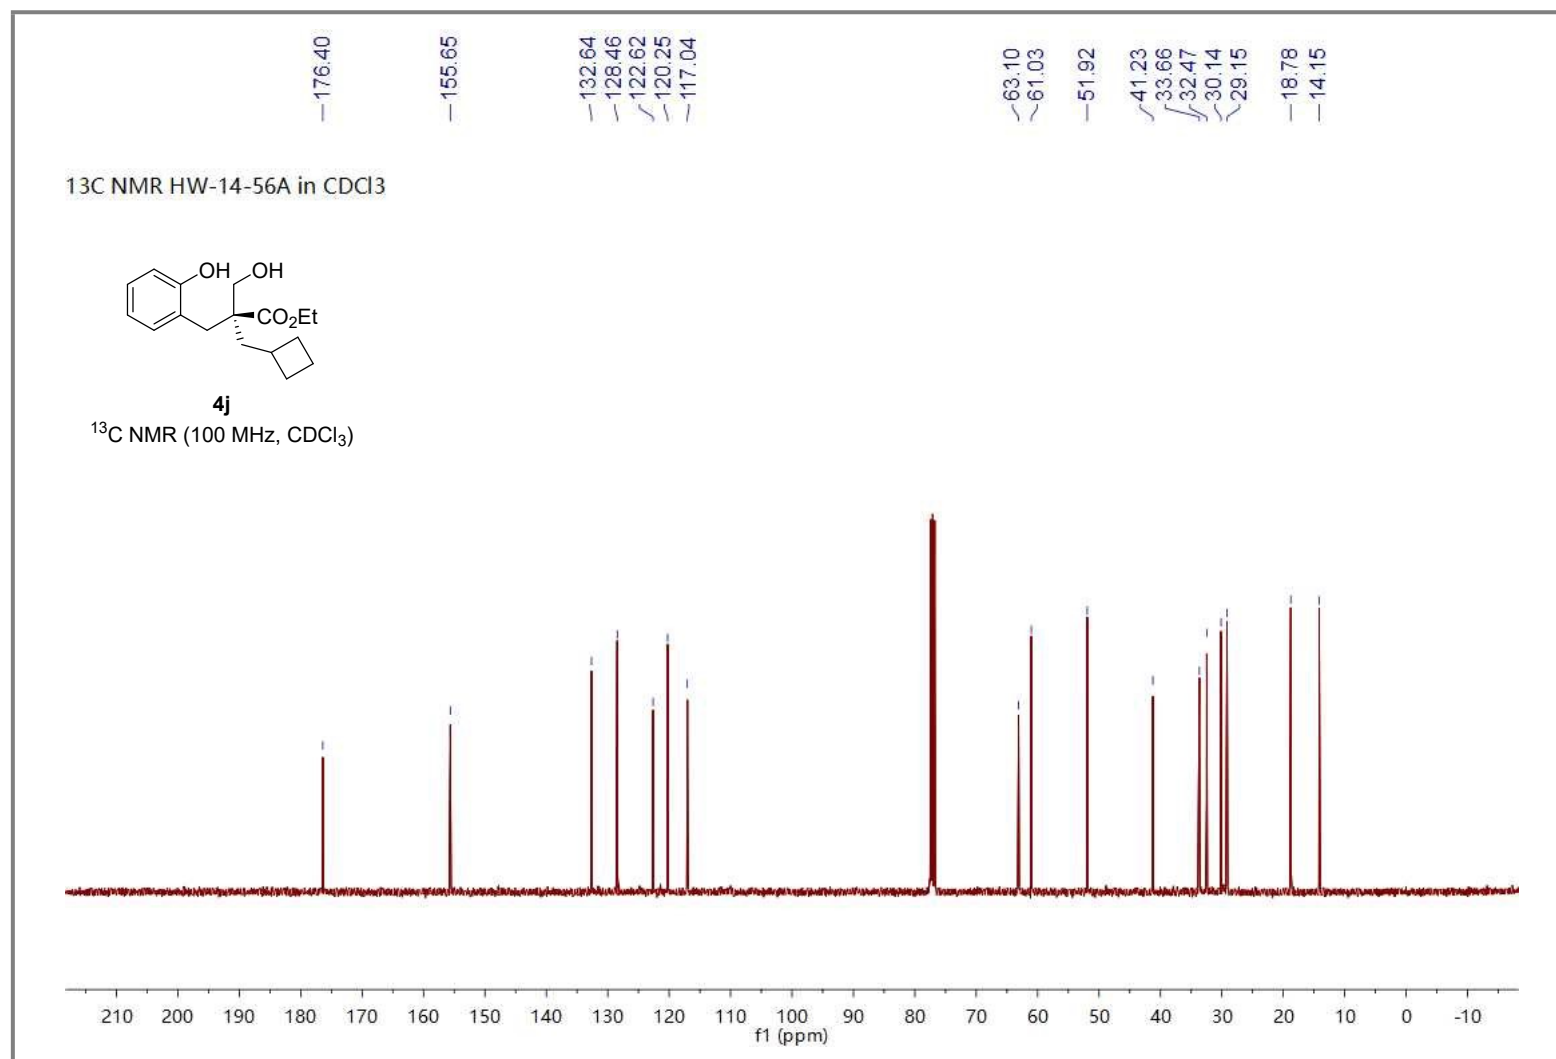

Data File C:\CHEM32\1\DATA\ZHOU-23\YZN022979.D  
 Sample Name: HW-14-41A TH+/-

=====  
 Acq. Operator :  
 Acq. Instrument : Instrument 1 Location : -  
 Injection Date : 4/26/2023 8:23:05 AM  
 Acq. Method : C:\CHEM32\1\METHODS\DEF\_LC.M  
 Last changed : 4/26/2023 8:22:04 AM  
 (modified after loading)  
 Analysis Method : C:\CHEM32\1\METHODS\DEF\_LC.M  
 Last changed : 10/17/2023 9:42:09 AM  
 (modified after loading)  
 Sample Info : IB, Hexane/i-PrOH = 95/5, 0.8 mL/min, 30 oC, 230 nm

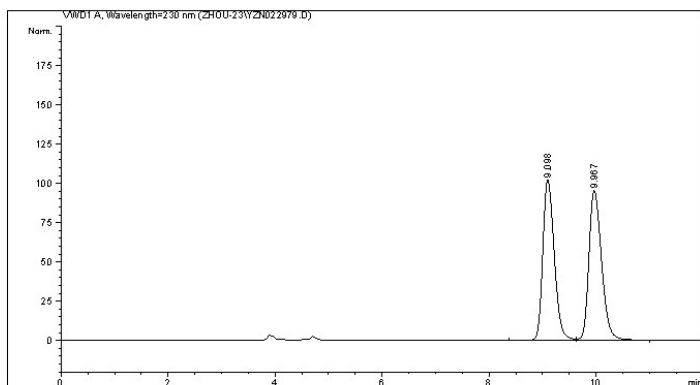

=====  
 Area Percent Report  
 =====

Sorted By : Signal  
 Multiplier: : 1.0000  
 Dilution: : 1.0000  
 Use Multiplier & Dilution Factor with ISTDs

Signal 1: VWD1 A, Wavelength=230 nm

| Peak # | RetTime [min] | Type | Width [min] | Area [mAU*s] | Height [mAU] | Area %  |
|--------|---------------|------|-------------|--------------|--------------|---------|
| 1      | 9.098         | VV   | 0.2332      | 1528.92163   | 101.94090    | 49.2315 |
| 2      | 9.967         | VV   | 0.2573      | 1576.65430   | 95.21244     | 50.7685 |

Totals : 3105.57593 197.15334

=====  
 \*\*\* End of Report \*\*\*

Instrument 1 10/17/2023 9:42:09 AM

Page 1 of 1

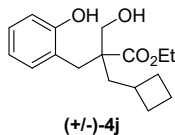

Data File C:\CHEM32\1\DATA\ZHOU-23\YZN023148.D  
 Sample Name: HW-14-56A TH

=====  
 Acq. Operator :  
 Acq. Instrument : Instrument 1 Location : -  
 Injection Date : 5/21/2023 2:23:55 AM  
 Acq. Method : C:\CHEM32\1\METHODS\DEF\_LC.M  
 Last changed : 5/21/2023 2:15:33 AM  
 (modified after loading)  
 Analysis Method : C:\CHEM32\1\METHODS\DEF\_LC.M  
 Last changed : 10/17/2023 9:43:13 AM  
 (modified after loading)  
 Sample Info : IB, Hexane/i-PrOH = 95/5, 0.8 mL/min, 30 oC, 230 nm

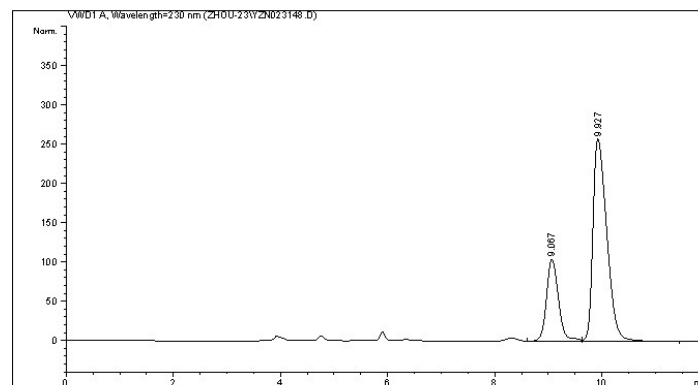

=====  
 Area Percent Report  
 =====

Sorted By : Signal  
 Multiplier: : 1.0000  
 Dilution: : 1.0000  
 Use Multiplier & Dilution Factor with ISTDs

Signal 1: VWD1 A, Wavelength=230 nm

| Peak # | RetTime [min] | Type | Width [min] | Area [mAU*s] | Height [mAU] | Area %  |
|--------|---------------|------|-------------|--------------|--------------|---------|
| 1      | 9.067         | VV   | 0.2464      | 1627.96777   | 104.17851    | 26.0059 |
| 2      | 9.927         | VV   | 0.2798      | 4632.03223   | 257.48196    | 73.9941 |

Totals : 6260.00000 361.66048

=====  
 \*\*\* End of Report \*\*\*

Instrument 1 10/17/2023 9:43:17 AM

Page 1 of 1

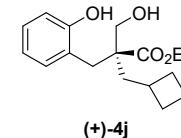

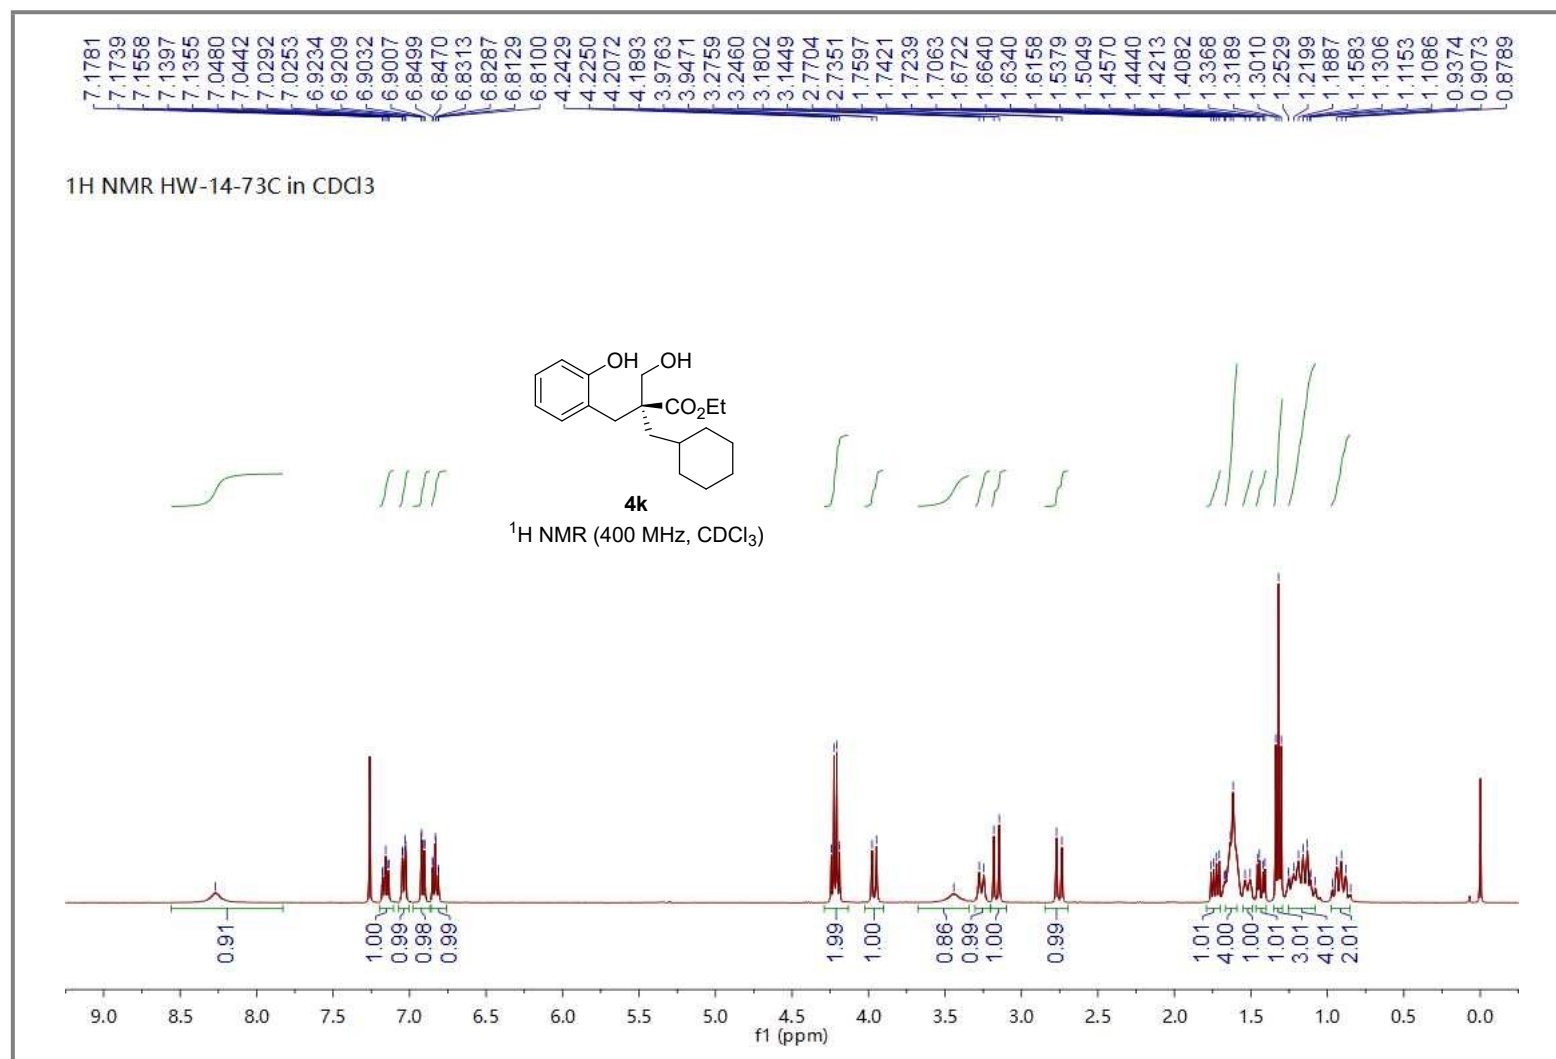



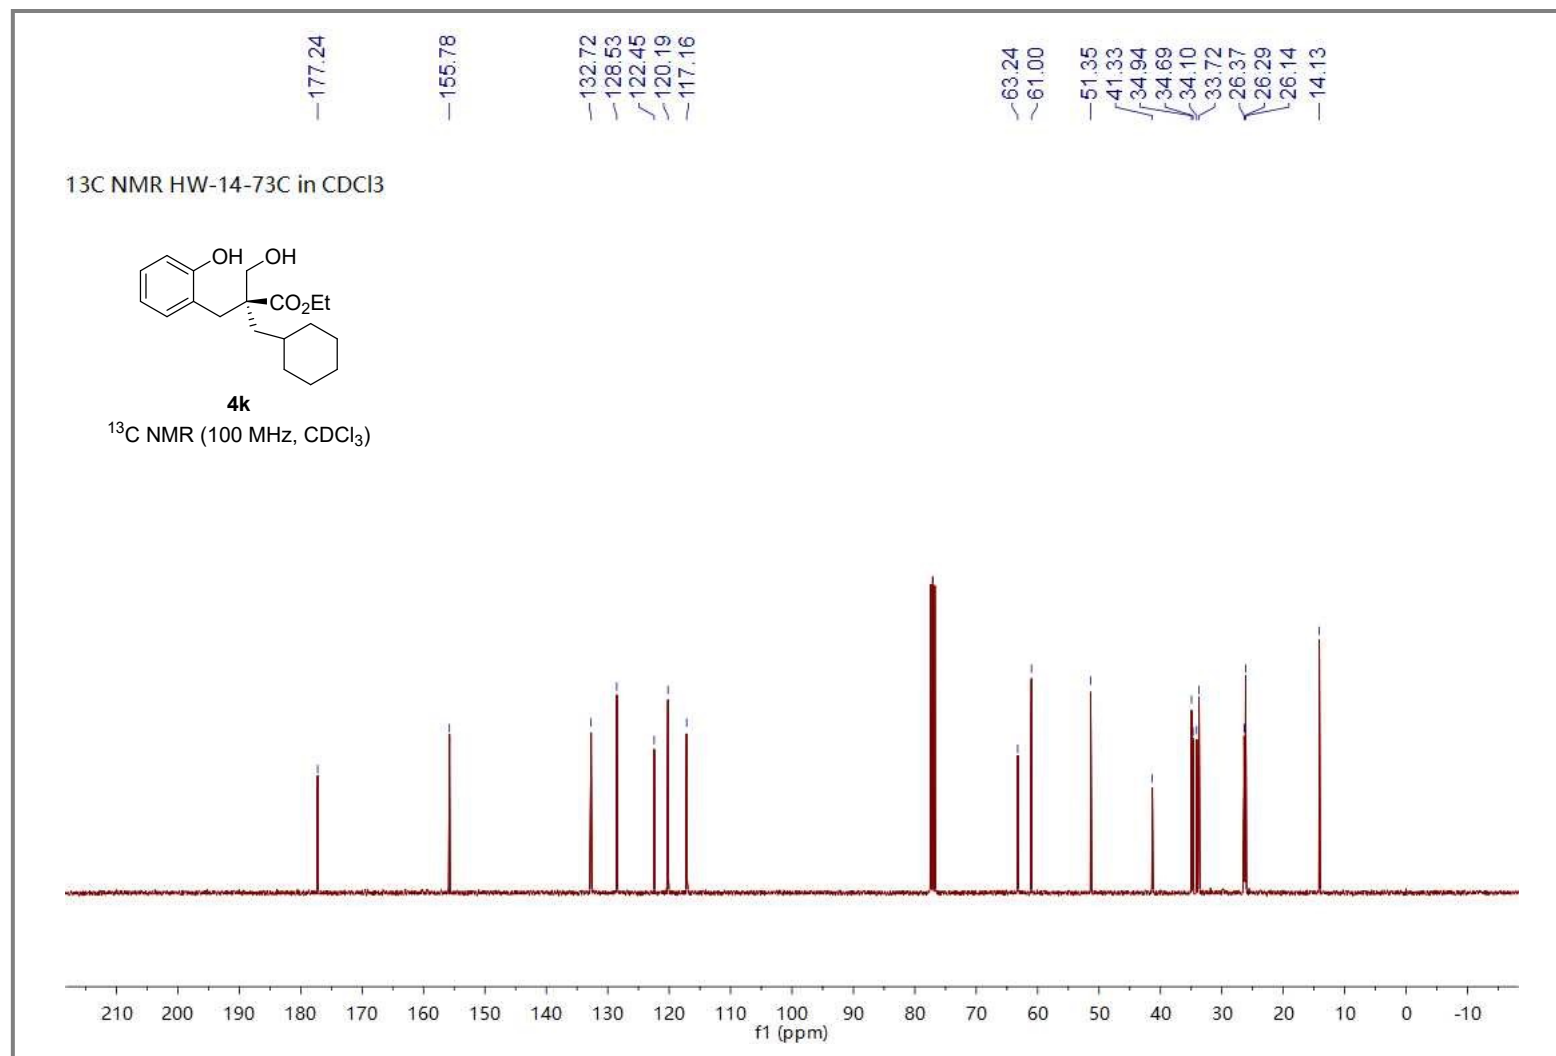

Data File C:\CHEM32\1\DATA\ZHOU-23\YZN023156.D  
 Sample Name: HW-14-56B TH+/-

=====  
 Acq. Operator :  
 Acq. Instrument : Instrument 1 Location : -  
 Injection Date : 5/22/2023 10:18:38 PM  
 Acq. Method : C:\CHEM32\1\METHODS\DEF\_LC.M  
 Last changed : 5/22/2023 10:17:24 PM  
 (modified after loading)  
 Analysis Method : C:\CHEM32\1\METHODS\DEF\_LC.M  
 Last changed : 10/17/2023 9:46:16 AM  
 (modified after loading)  
 Sample Info : AS-H, Hexane/i-PrOH = 90/10, 0.8 mL/min, 30 oC, 220 nm

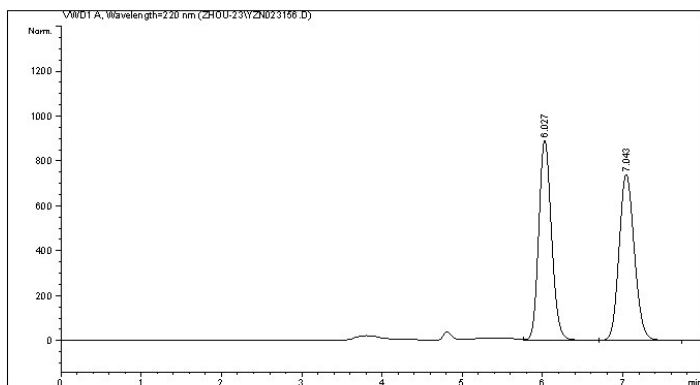

=====  
 Area Percent Report  
 =====

Sorted By : Signal  
 Multiplier: : 1.0000  
 Dilution: : 1.0000  
 Use Multiplier & Dilution Factor with ISTDs

Signal 1: VWD1 A, Wavelength=220 nm

| Peak # | RetTime [min] | Type | Width [min] | Area [mAU] | Height [mAU] | Area %  |
|--------|---------------|------|-------------|------------|--------------|---------|
| 1      | 6.027         | VV   | 0.1705      | 9900.32520 | 890.14624    | 50.2350 |
| 2      | 7.043         | VV   | 0.2074      | 9807.71289 | 738.23425    | 49.7650 |

Totals : 1.97080e4 1628.38049

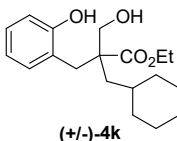

=====  
 \*\*\* End of Report \*\*\*

Instrument 1 10/17/2023 9:46:18 AM

Page 1 of 1

Data File C:\CHEM32\1\DATA\ZHOU-23\YZN023225.D  
 Sample Name: HW-14-73C TH

=====  
 Acq. Operator :  
 Acq. Instrument : Instrument 1 Location : -  
 Injection Date : 5/31/2023 2:12:13 AM  
 Acq. Method : C:\CHEM32\1\METHODS\DEF\_LC.M  
 Last changed : 5/31/2023 2:11:14 AM  
 (modified after loading)  
 Analysis Method : C:\CHEM32\1\METHODS\DEF\_LC.M  
 Last changed : 10/17/2023 9:47:08 AM  
 (modified after loading)  
 Sample Info : AS-H, Hexane/i-PrOH = 90/10, 0.8 mL/min, 30 oC, 230 nm

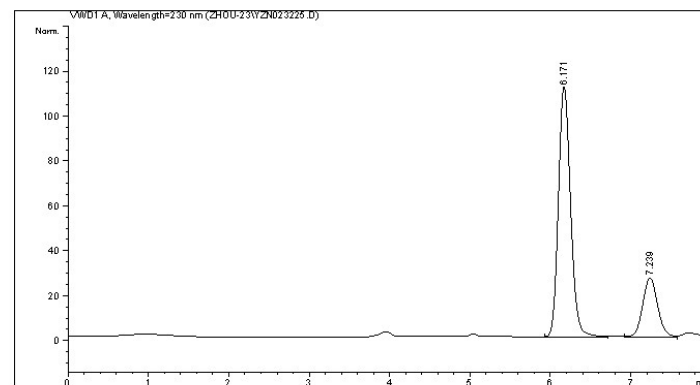

=====  
 Area Percent Report  
 =====

Sorted By : Signal  
 Multiplier: : 1.0000  
 Dilution: : 1.0000  
 Use Multiplier & Dilution Factor with ISTDs

Signal 1: VWD1 A, Wavelength=230 nm

| Peak # | RetTime [min] | Type | Width [min] | Area [mAU] | Height [mAU] | Area %  |
|--------|---------------|------|-------------|------------|--------------|---------|
| 1      | 6.171         | BV   | 0.1701      | 1174.89648 | 110.97256    | 77.5276 |
| 2      | 7.239         | VV   | 0.1976      | 340.55948  | 26.31386     | 22.4724 |

Totals : 1515.45596 137.28643

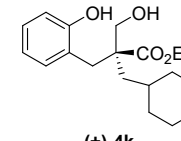

=====  
 \*\*\* End of Report \*\*\*

Instrument 1 10/17/2023 9:47:11 AM

Page 1 of 1

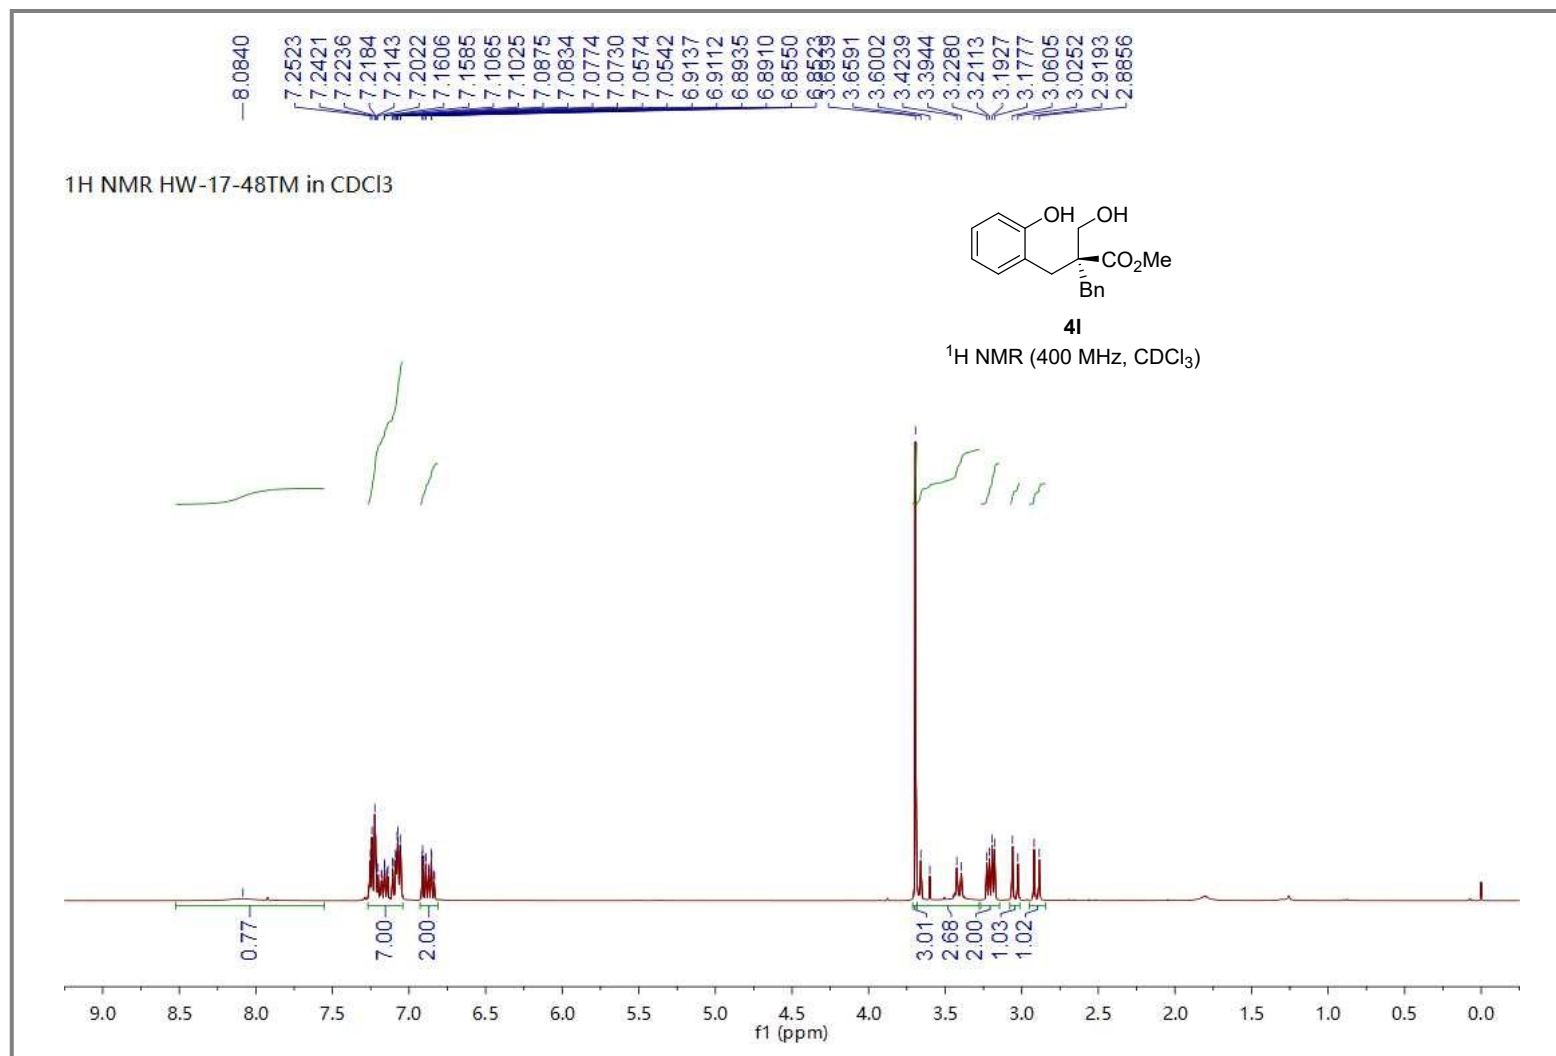

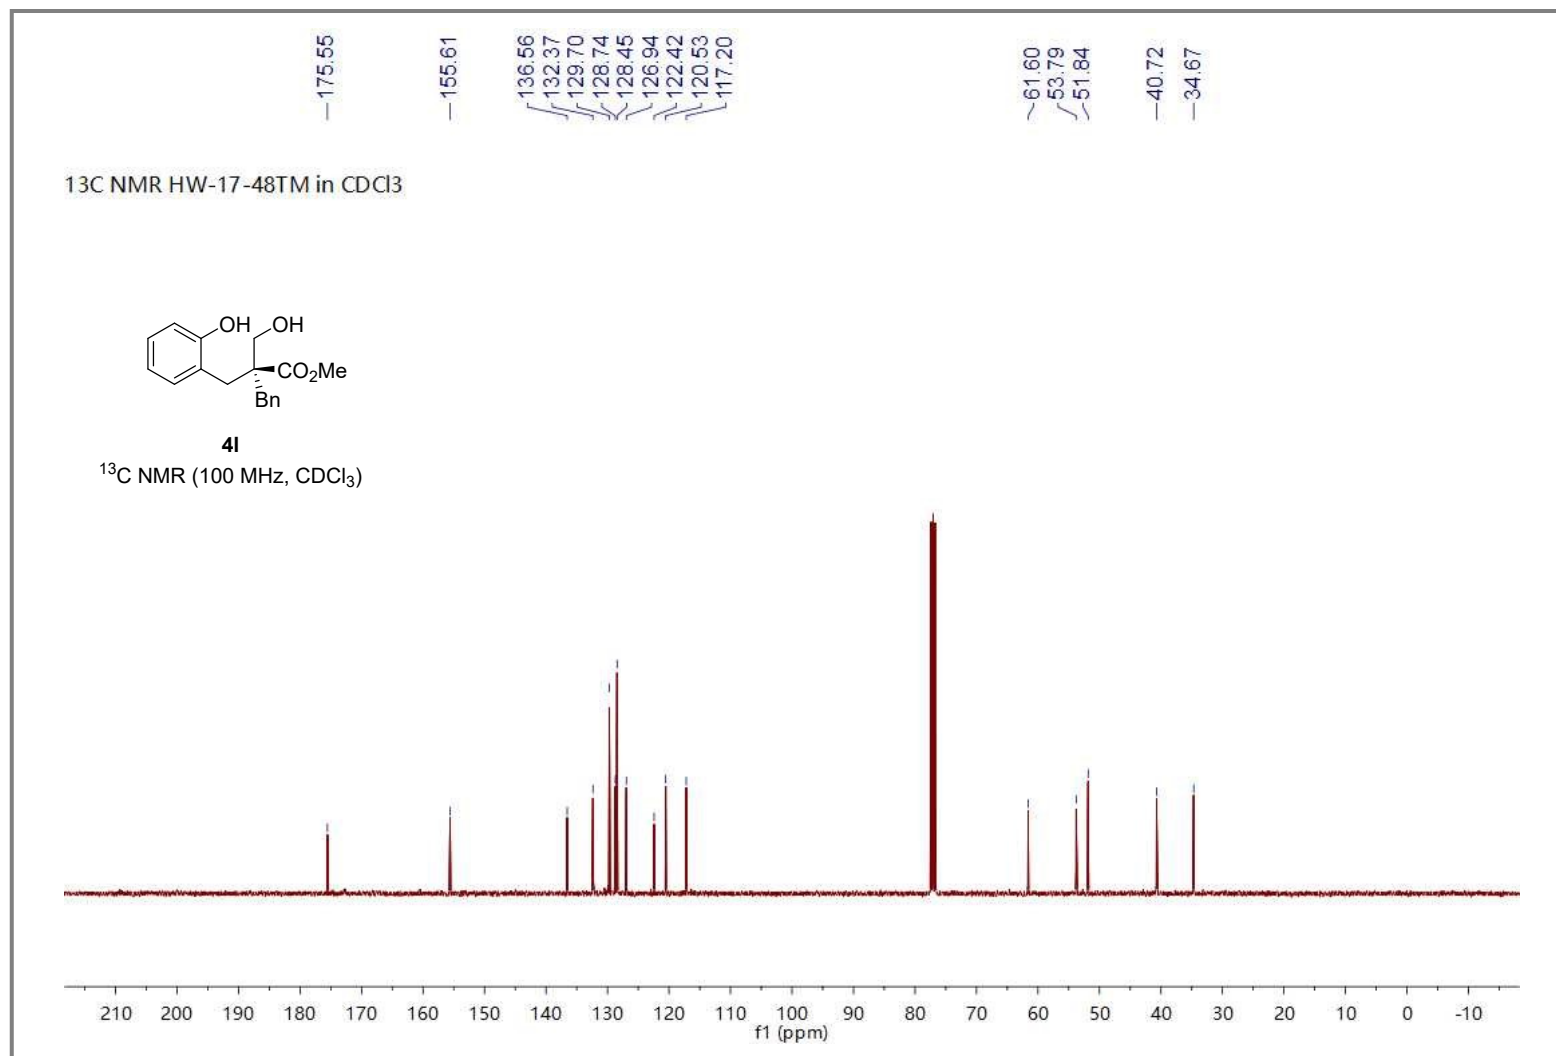

Data File D:\USERS\CHEMSTATION\1\DATA\ZHOU2024\YZ3009335 08-23-31.D  
 Sample Name: HW-17-48TM+/-

=====  
 Acq. Operator : SYSTEM  
 Sample Operator : SYSTEM  
 Acq. Instrument : 1260II Location : -  
 Injection Date : 4/28/2024 8:23:31 AM Inj : 1  
 Inj Volume : No inj  
 Acq. Method : C:\Users\Public\Documents\ChemStation\1\Methods\def\_LC.M  
 Last changed : 4/28/2024 8:08:31 AM by SYSTEM  
 (modified after loading)  
 Analysis Method : C:\Users\Public\Documents\ChemStation\1\Methods\def\_LC.M  
 Last changed : 4/28/2024 10:00:18 AM by SYSTEM  
 (modified after loading)  
 Sample Info : IB, n-Hexane/1-PrOH = 97/3, 1.0 mL/min, 30 oC, 230 nm

Additional Info : Peak(s) manually integrated

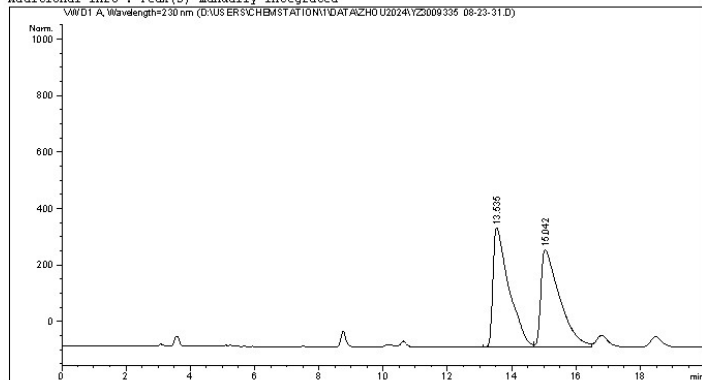

=====  
 Area Percent Report  
 =====

Sorted By : Signal  
 Multiplier : 1.0000  
 Dilution : 1.0000  
 Do not use Multiplier & Dilution Factor with ISTDs

Signal 1: VWD1 A, Wavelength=230 nm

| Peak # | RetTime [min] | Type | Width [min] | Area [mAU*s] | Height [mAU] | Area %  |
|--------|---------------|------|-------------|--------------|--------------|---------|
| 1      | 13.535        | BV   | 0.5013      | 8433.72168   | 245.18311    | 51.0353 |
| 2      | 15.042        | VV   | 0.5842      | 8091.54639   | 199.93265    | 48.9647 |

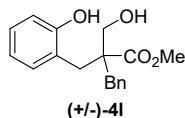

Data File D:\USERS\CHEMSTATION\1\DATA\ZHOU2024\YZ3009336 08-47-37.D  
 Sample Name: HW-17-48TM

=====  
 Acq. Operator : SYSTEM  
 Sample Operator : SYSTEM  
 Acq. Instrument : 1260II Location : -  
 Injection Date : 4/28/2024 8:47:37 AM Inj : 1  
 Inj Volume : No inj  
 Acq. Method : C:\Users\Public\Documents\ChemStation\1\Methods\def\_LC.M  
 Last changed : 4/28/2024 8:08:31 AM by SYSTEM  
 (modified after loading)  
 Analysis Method : C:\Users\Public\Documents\ChemStation\1\Methods\def\_LC.M  
 Last changed : 4/28/2024 9:57:35 AM by SYSTEM  
 (modified after loading)  
 Sample Info : IB, n-Hexane/1-PrOH = 97/3, 1.0 mL/min, 30 oC, 230 nm

Additional Info : Peak(s) manually integrated

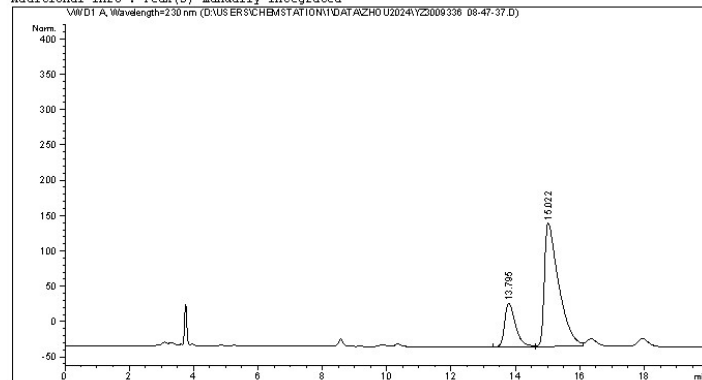

=====  
 Area Percent Report  
 =====

Sorted By : Signal  
 Multiplier : 1.0000  
 Dilution : 1.0000  
 Do not use Multiplier & Dilution Factor with ISTDs

Signal 1: VWD1 A, Wavelength=230 nm

| Peak # | RetTime [min] | Type | Width [min] | Area [mAU*s] | Height [mAU] | Area %  |
|--------|---------------|------|-------------|--------------|--------------|---------|
| 1      | 13.795        | BV   | 0.3533      | 844.73486    | 36.59961     | 20.7135 |
| 2      | 15.022        | VV   | 0.4490      | 3233.44556   | 104.50420    | 79.2865 |

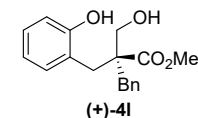

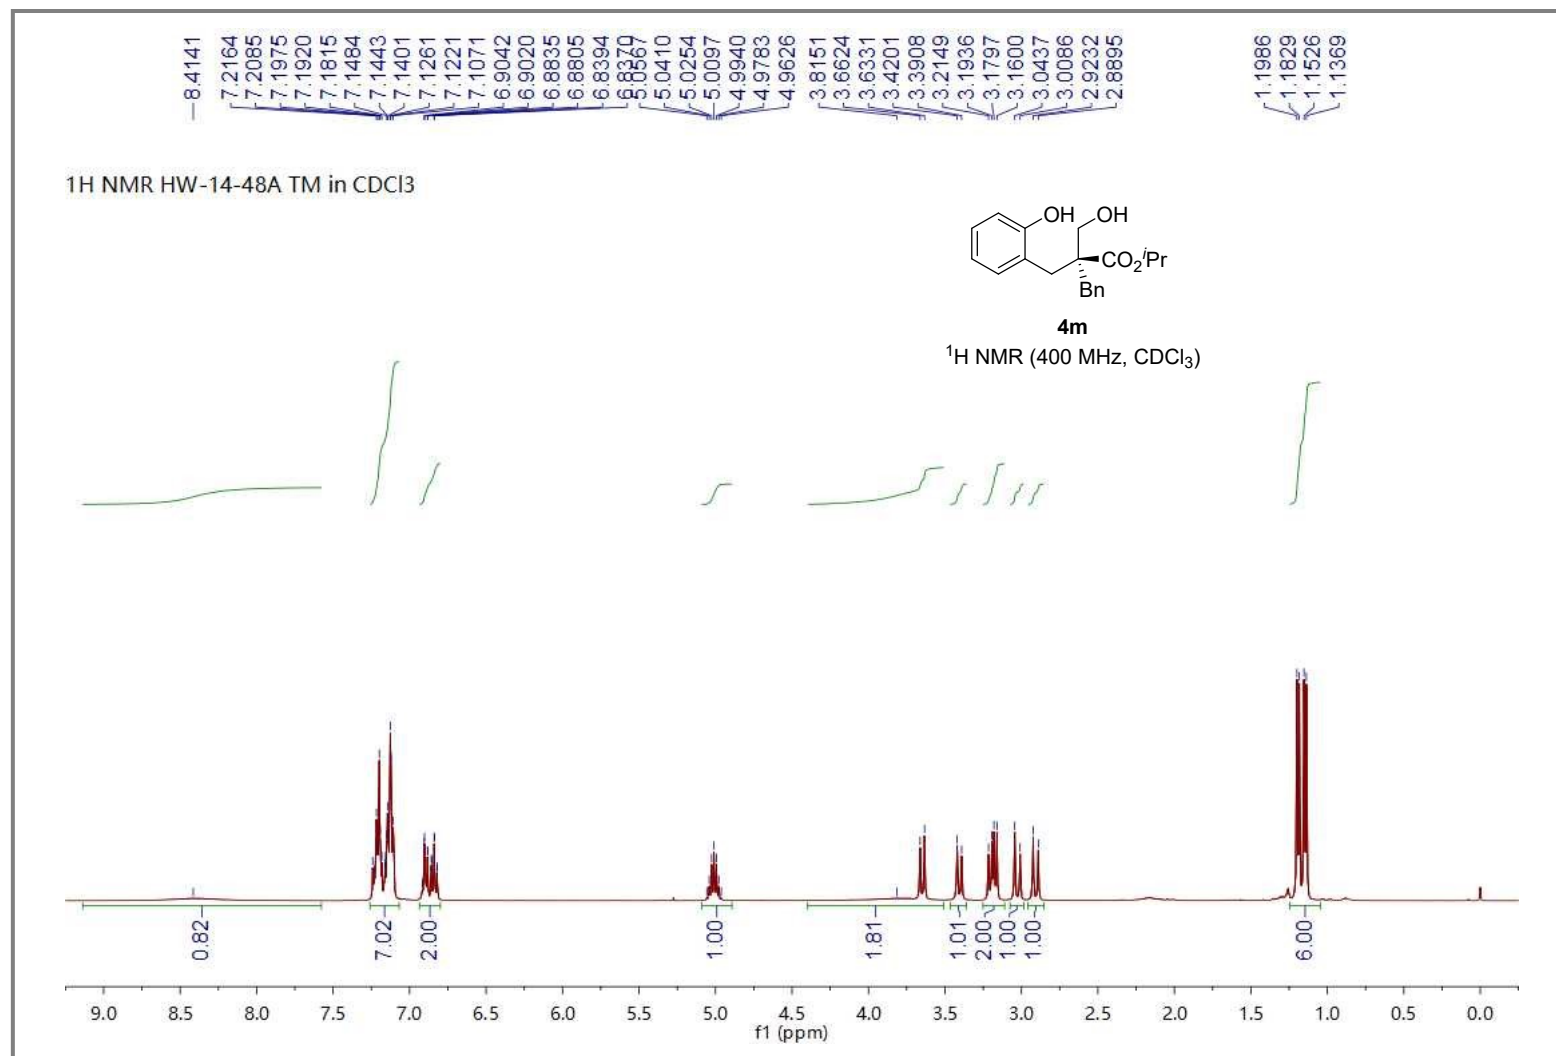

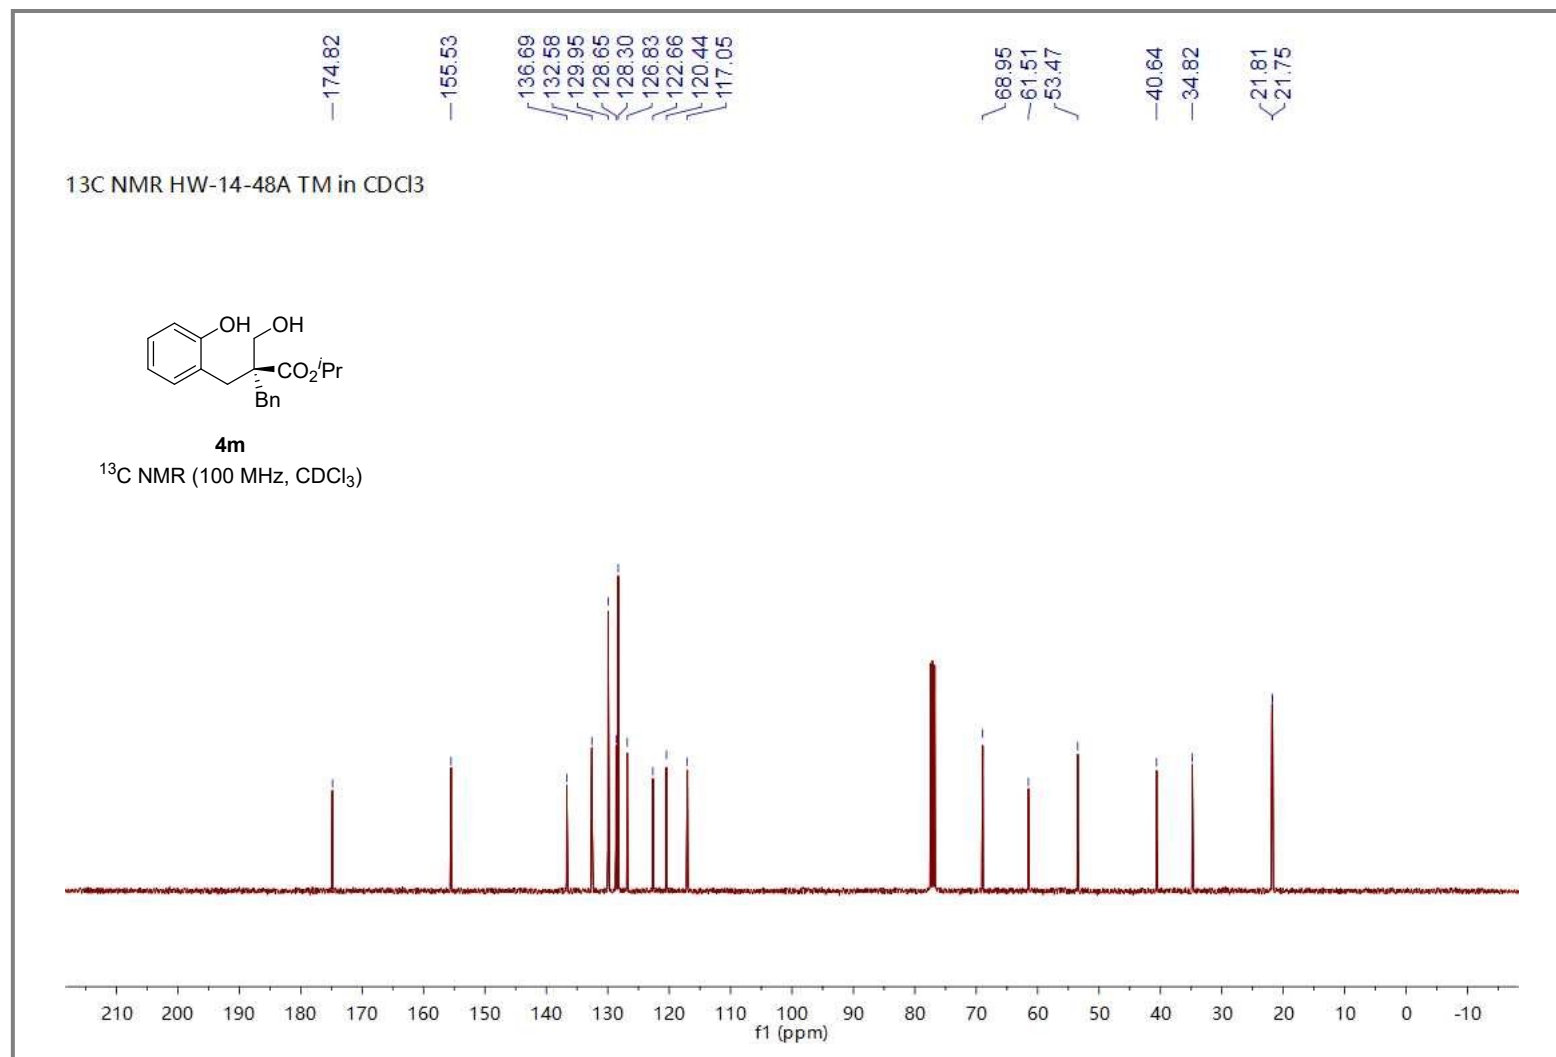

Data File C:\CHEM32\1\DATA\ZHOU-23\YZN023017.D  
 Sample Name: HW-14-48A TH+/-

=====  
 Acq. Operator :  
 Acq. Instrument : Instrument 1 Location : -  
 Injection Date : 5/5/2023 6:35:45 AM  
 Acq. Method : C:\CHEM32\1\METHODS\DEF\_LC.M  
 Last changed : 5/5/2023 6:35:18 AM  
 (modified after loading)  
 Analysis Method : C:\CHEM32\1\METHODS\DEF\_LC.M  
 Last changed : 10/17/2023 9:50:10 AM  
 (modified after loading)  
 Sample Info : IB, Hexane/i-PrOH = 95/5, 0.8 mL/min, 30 oC, 230nm

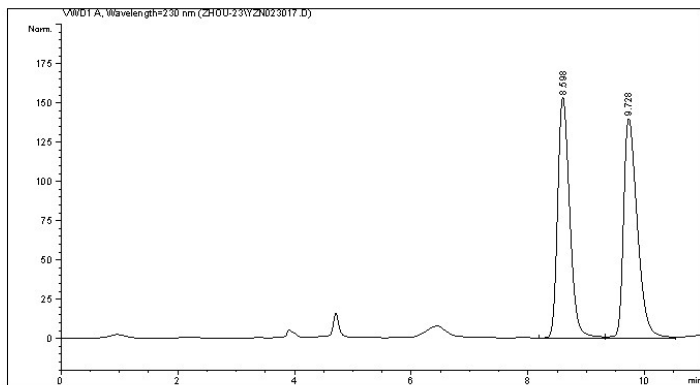

=====  
 Area Percent Report  
 =====

Sorted By : Signal  
 Multiplier: : 1.0000  
 Dilution: : 1.0000  
 Use Multiplier & Dilution Factor with ISTDs

Signal 1: VWD1 A, Wavelength=230 nm

| Peak # | RetTime [min] | Type | Width [min] | Area mAU   | Height %s | Area [mAU] | Area % |
|--------|---------------|------|-------------|------------|-----------|------------|--------|
| 1      | 8.598         | VV   | 0.2257      | 2197.08643 | 153.03523 | 49.0022    |        |
| 2      | 9.728         | VV   | 0.2555      | 2286.56616 | 139.36580 | 50.9978    |        |

Totals : 4483.65259 292.40103

=====  
 \*\*\* End of Report \*\*\*

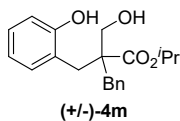

Data File C:\CHEM32\1\DATA\ZHOU-23\YZN023018.D  
 Sample Name: HW-14-48A TH

=====  
 Acq. Operator :  
 Acq. Instrument : Instrument 1 Location : -  
 Injection Date : 5/5/2023 6:50:22 AM  
 Acq. Method : C:\CHEM32\1\METHODS\DEF\_LC.M  
 Last changed : 5/5/2023 6:49:58 AM  
 (modified after loading)  
 Analysis Method : C:\CHEM32\1\METHODS\DEF\_LC.M  
 Last changed : 10/17/2023 9:51:19 AM  
 (modified after loading)  
 Sample Info : IB, Hexane/i-PrOH = 95/5, 0.8 mL/min, 30 oC, 230nm

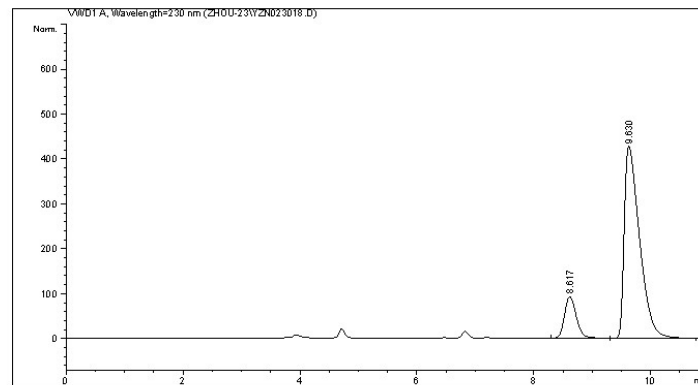

=====  
 Area Percent Report  
 =====

Sorted By : Signal  
 Multiplier: : 1.0000  
 Dilution: : 1.0000  
 Use Multiplier & Dilution Factor with ISTDs

Signal 1: VWD1 A, Wavelength=230 nm

| Peak # | RetTime [min] | Type | Width [min] | Area mAU   | Height %s | Area [mAU] | Area % |
|--------|---------------|------|-------------|------------|-----------|------------|--------|
| 1      | 8.617         | VV   | 0.2231      | 1309.10754 | 92.63066  | 14.4020    |        |
| 2      | 9.630         | VV   | 0.2769      | 7780.67188 | 426.52310 | 85.5980    |        |

Totals : 9089.77942 519.15376

=====  
 \*\*\* End of Report \*\*\*

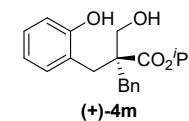



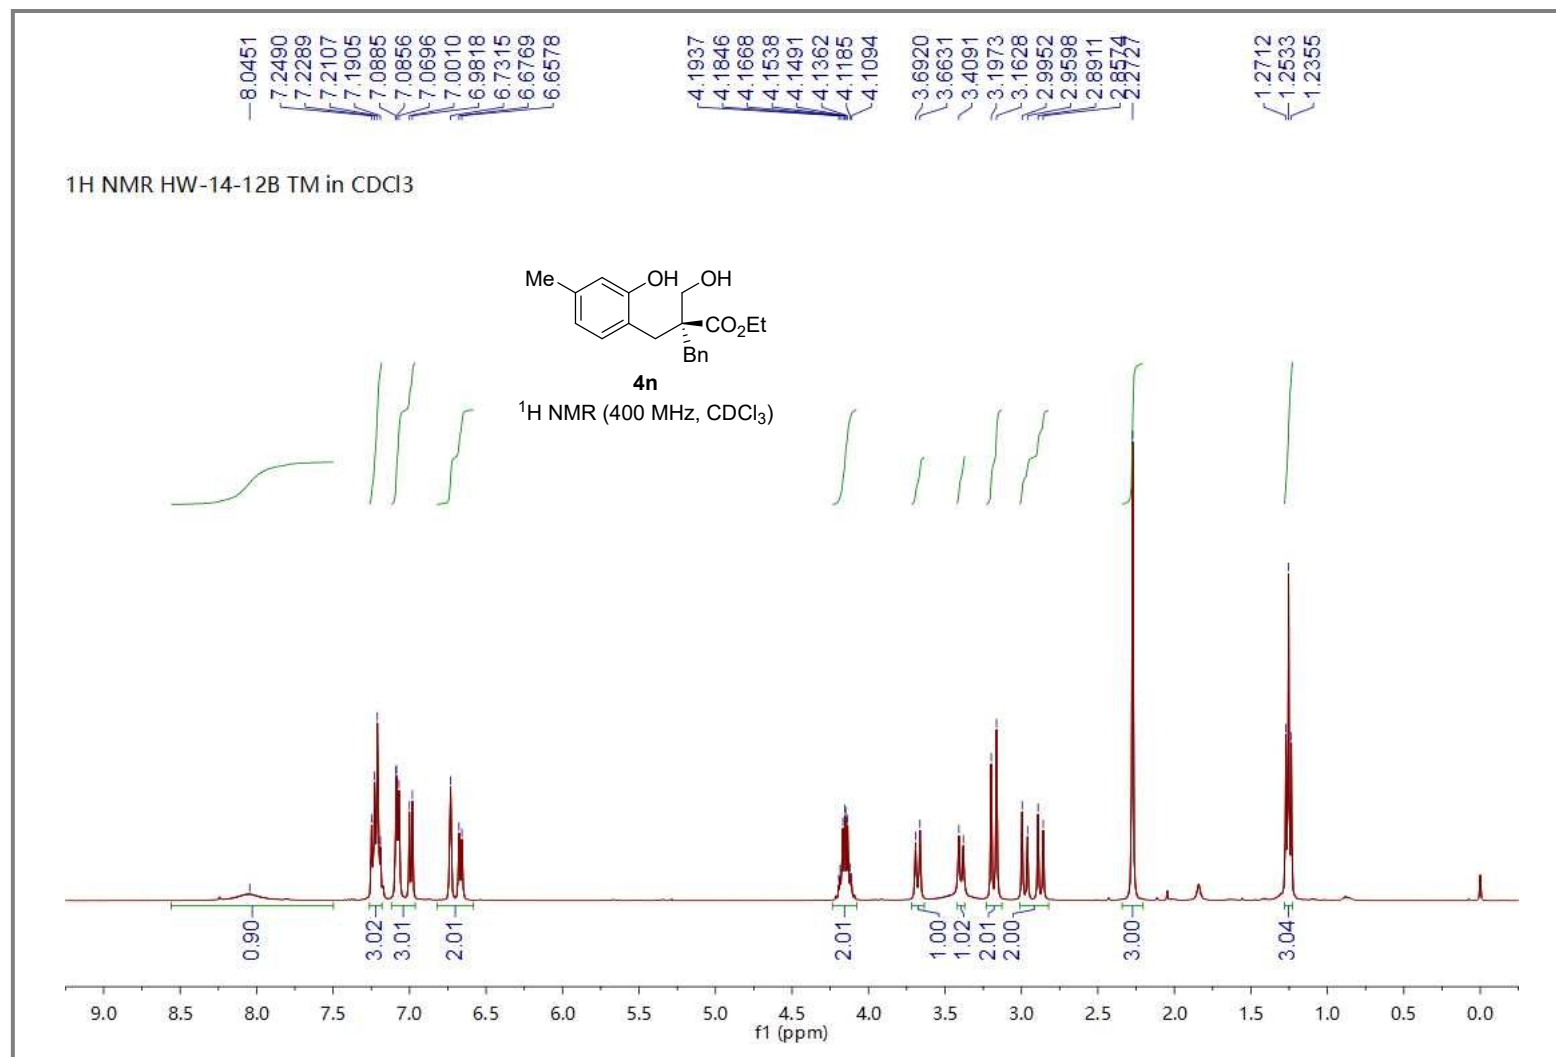

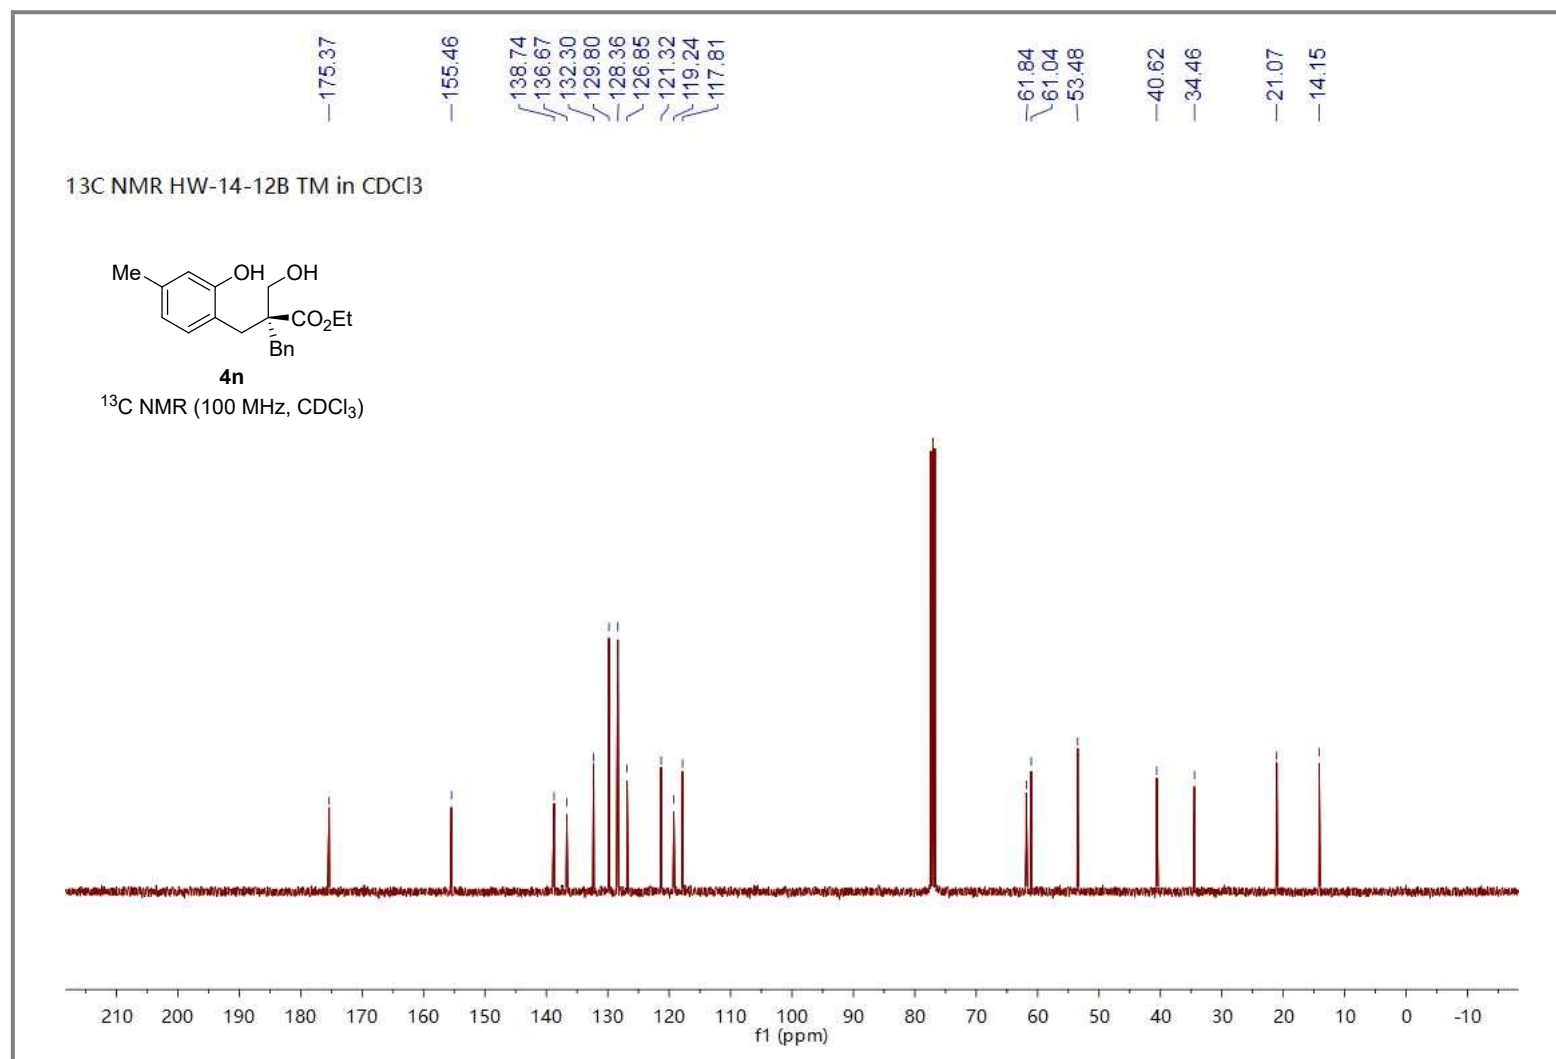

Data File C:\CHEM32\1\DATA\ZHOU-23\YZN024701.D  
 Sample Name: HW-14-12ETH+/-

=====  
 Acq. Operator :  
 Acq. Instrument : Instrument 1 Location : -  
 Injection Date : 12/1/2023 2:40:00 AM  
 Acq. Method : C:\CHEM32\1\METHODS\DEF\_LC.M  
 Last changed : 12/1/2023 2:31:04 AM  
 (modified after loading)  
 Analysis Method : C:\CHEM32\1\METHODS\DEF\_LC.M  
 Last changed : 12/1/2023 3:30:06 AM  
 (modified after loading)  
 Sample Info : IA, Hexane/iPrOH = 95/5, 0.8 mL/min, 30 oC, 230 nm

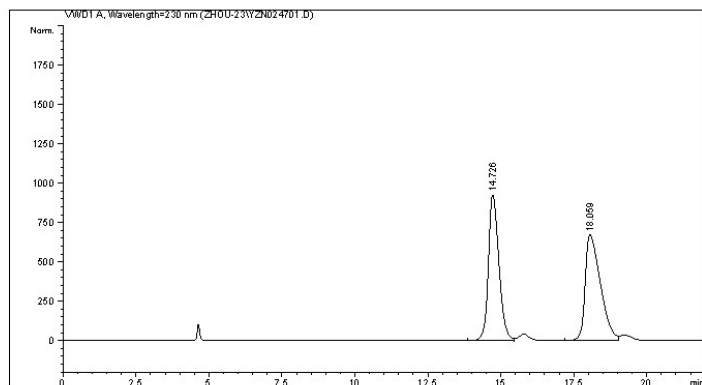

=====  
 Area Percent Report  
 =====

Sorted By : Signal  
 Multiplier: : 1.0000  
 Dilution: : 1.0000  
 Use Multiplier & Dilution Factor with ISTDs

Signal 1: VWD1 A, Wavelength=230 nm

| Peak # | RetTime [min] | Type | Width [min] | Area [mAU] | Height [mAU] | Area %  |
|--------|---------------|------|-------------|------------|--------------|---------|
| 1      | 14.726        | BV   | 0.3848      | 2.32406e4  | 929.63464    | 48.8079 |
| 2      | 18.059        | BV   | 0.5630      | 2.43758e4  | 671.90833    | 51.1921 |

Totals : 4.76164e4 1601.54297

=====  
 \*\*\* End of Report \*\*\*

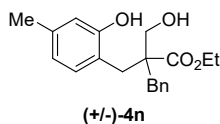

Data File C:\CHEM32\1\DATA\ZHOU-23\YZN024702.D  
 Sample Name: HW-14-12ETH

=====  
 Acq. Operator :  
 Acq. Instrument : Instrument 1 Location : -  
 Injection Date : 12/1/2023 3:04:06 AM  
 Acq. Method : C:\CHEM32\1\METHODS\DEF\_LC.M  
 Last changed : 12/1/2023 3:03:19 AM  
 (modified after loading)  
 Analysis Method : C:\CHEM32\1\METHODS\DEF\_LC.M  
 Last changed : 12/1/2023 3:29:08 AM  
 (modified after loading)  
 Sample Info : IA, Hexane/iPrOH = 95/5, 0.8 mL/min, 30 oC, 230 nm

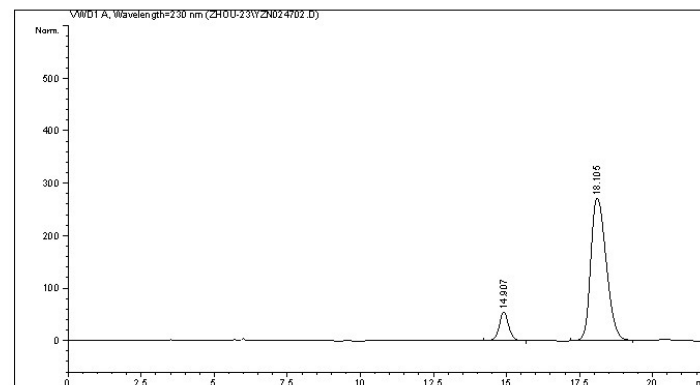

=====  
 Area Percent Report  
 =====

Sorted By : Signal  
 Multiplier: : 1.0000  
 Dilution: : 1.0000  
 Use Multiplier & Dilution Factor with ISTDs

Signal 1: VWD1 A, Wavelength=230 nm

| Peak # | RetTime [min] | Type | Width [min] | Area [mAU] | Height [mAU] | Area %  |
|--------|---------------|------|-------------|------------|--------------|---------|
| 1      | 14.907        | EB   | 0.3381      | 1226.70667 | 55.15179     | 10.9720 |
| 2      | 18.105        | EB   | 0.5808      | 9953.66699 | 271.37015    | 89.0280 |

Totals : 1.11804e4 326.52193

=====  
 \*\*\* End of Report \*\*\*

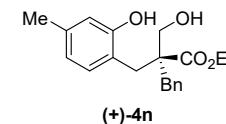

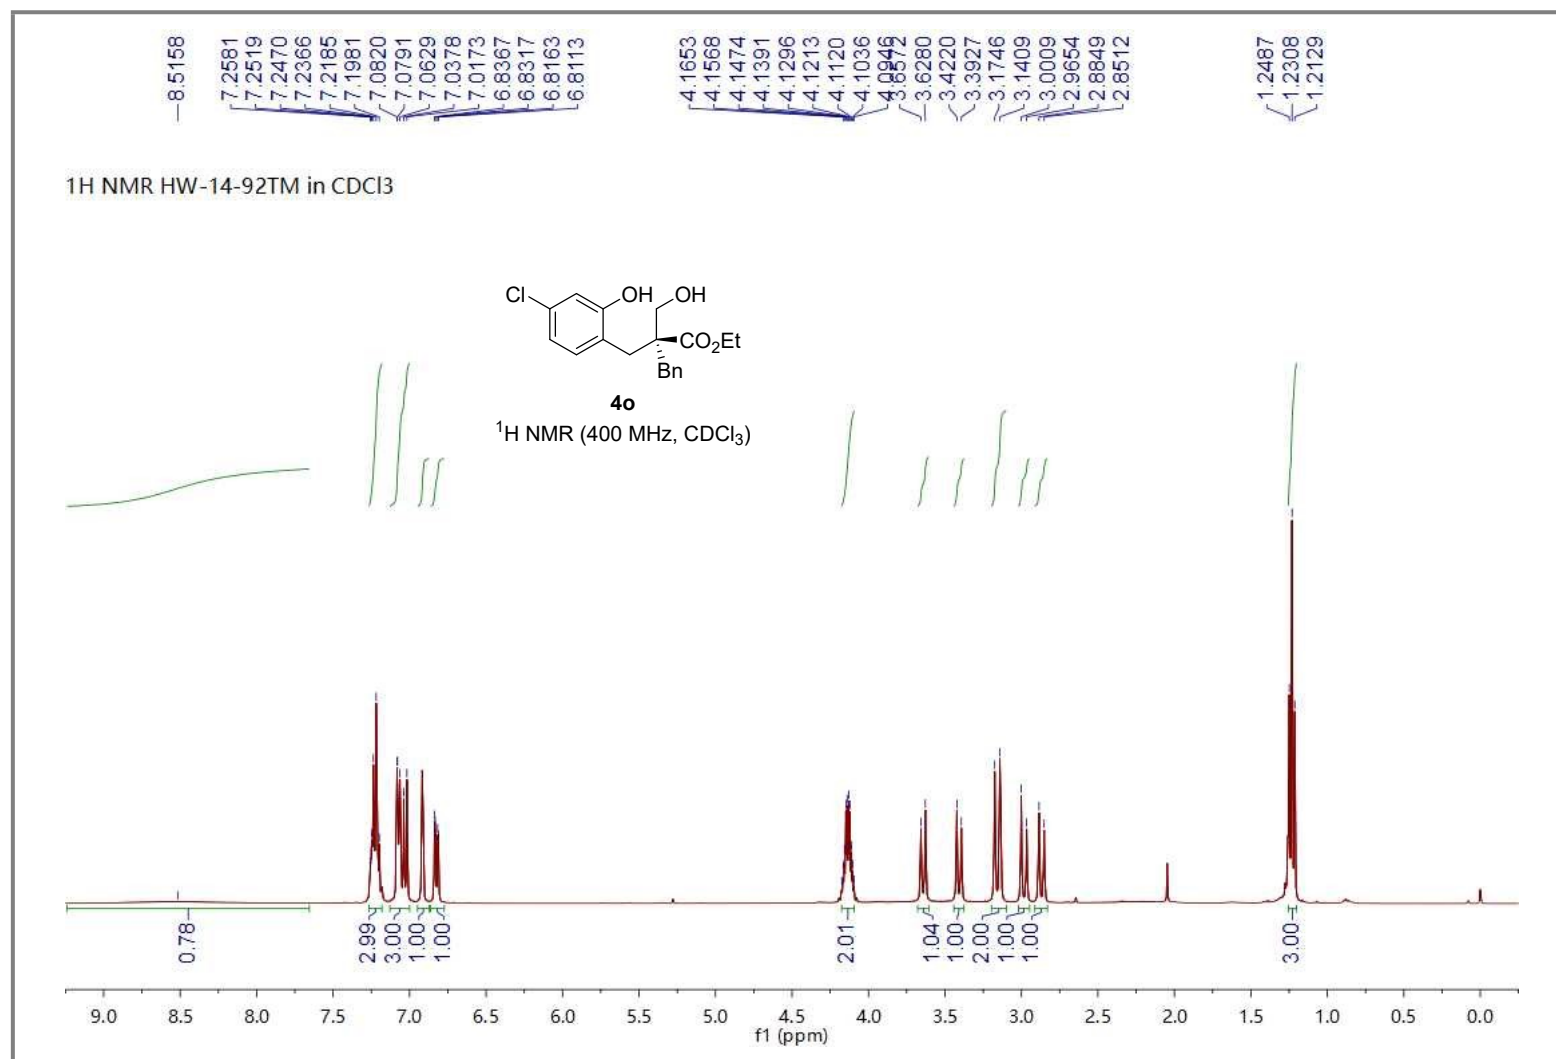

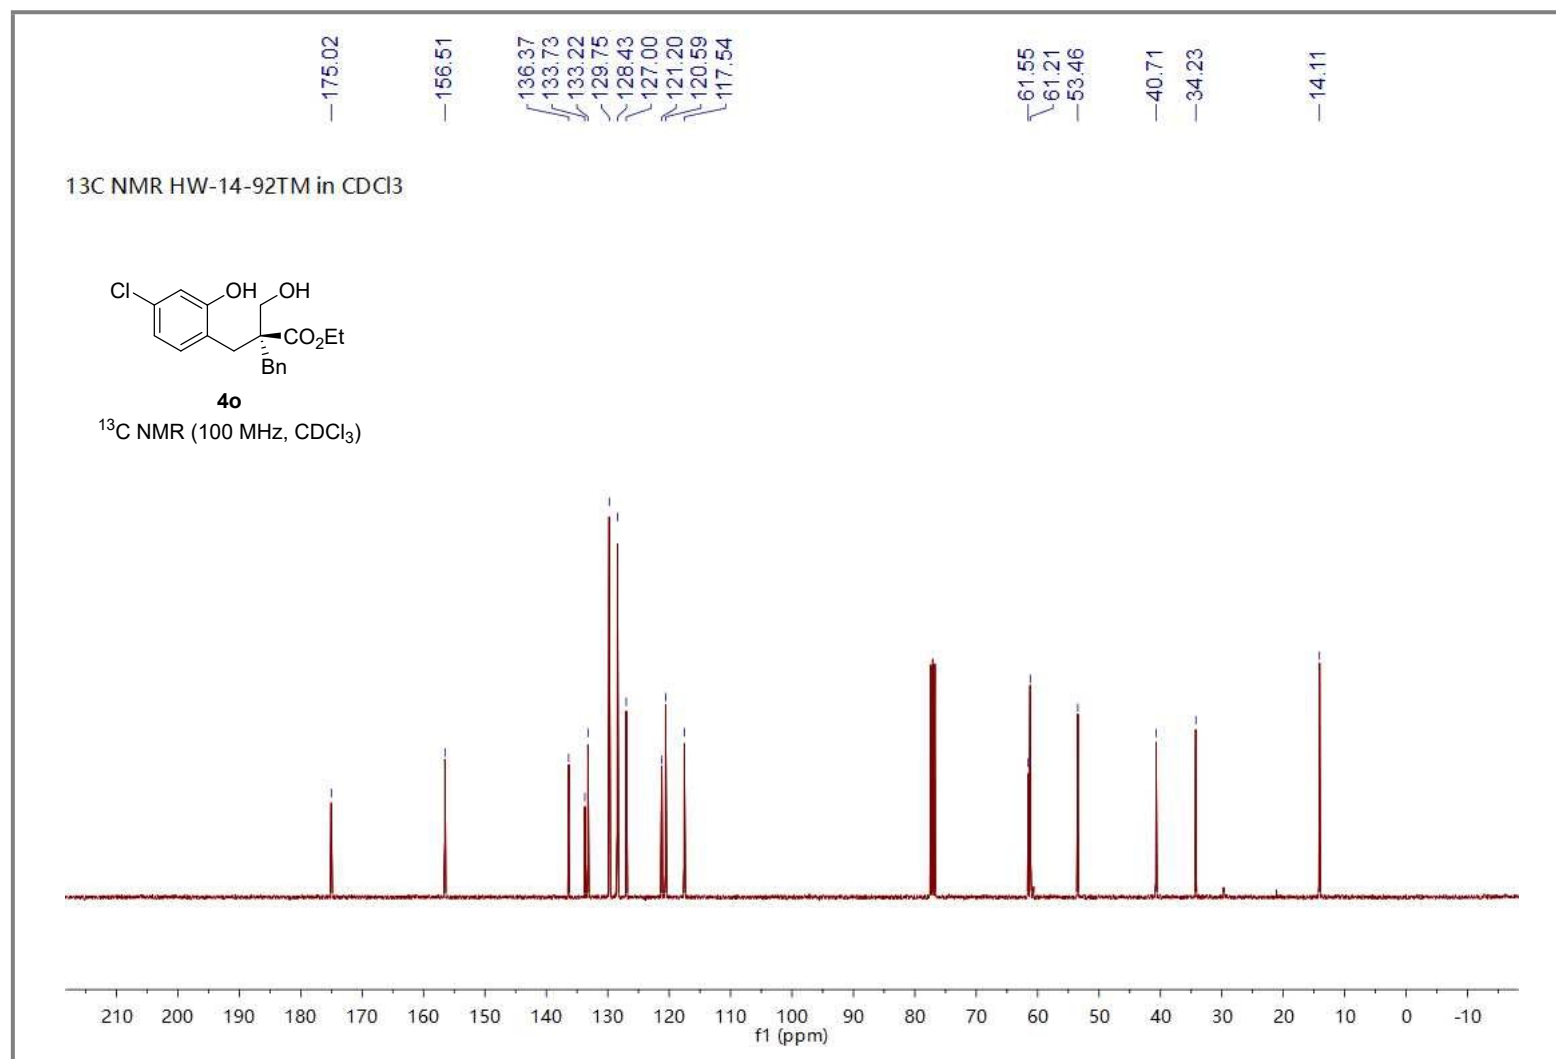

Data File C:\USERS\PUBLIC\DOCUMENTS\CHEMSTATION\1\DATA\2023\YZH005570 10-07-47.D  
 Sample Name: HW-14-92TM+/-

=====  
 Acq. Operator : SYSTEM  
 Sample Operator : SYSTEM  
 Acq. Instrument : HPLC1260 II Location : 1  
 Injection Date : 11/29/2023 10:07:48 AM Inj : 1  
 Inj Volume : No inj  
 Acq. Method : C:\USERS\PUBLIC\DOCUMENTS\CHEMSTATION\1\METHODS\def\_LC1.M  
 Last changed : 11/29/2023 10:07:11 AM by SYSTEM  
 (modified after loading)  
 Analysis Method : C:\USERS\PUBLIC\DOCUMENTS\CHEMSTATION\1\METHODS\def\_LC1.M  
 Last changed : 11/29/2023 11:07:54 AM by SYSTEM  
 (modified after loading)  
 Sample Info : IB, Hexane/i-PrOH = 95/5, 0.8 mL/min, 30 oC, 230 nm

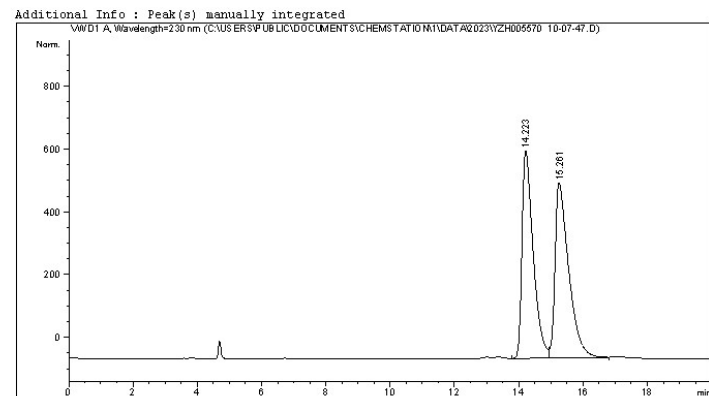

=====  
 Area Percent Report  
 =====

Sorted By : Signal  
 Multiplier : 1.0000  
 Dilution : 1.0000  
 Sample Amount : 1.00000 [ng/ul] (not used in calc.)  
 Do not use Multiplier & Dilution Factor with ISTDs

Signal 1: VWD1 A, Wavelength=230 nm

| Peak # | RetTime [min] | Type | Width [min] | Area [mAU*s] | Height [mAU] | Area %  |
|--------|---------------|------|-------------|--------------|--------------|---------|
| 1      | 14.223        | BV   | 0.3595      | 1.27398e4    | 529.96002    | 49.1258 |
| 2      | 15.261        | VB   | 0.4330      | 1.31932e4    | 447.39484    | 50.8742 |

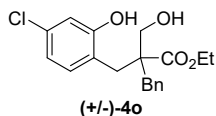

Data File C:\USERS\PUBLIC\DOCUMENTS\CHEMSTATION\1\DATA\2023\YZH005571 10-30-15.D  
 Sample Name: HW-14-92TM

=====  
 Acq. Operator : SYSTEM  
 Sample Operator : SYSTEM  
 Acq. Instrument : HPLC1260 II Location : 1  
 Injection Date : 11/29/2023 10:30:15 AM Inj : 1  
 Inj Volume : No inj  
 Acq. Method : C:\USERS\PUBLIC\DOCUMENTS\CHEMSTATION\1\METHODS\def\_LC1.M  
 Last changed : 11/29/2023 10:07:11 AM by SYSTEM  
 (modified after loading)  
 Analysis Method : C:\USERS\PUBLIC\DOCUMENTS\CHEMSTATION\1\METHODS\def\_LC1.M  
 Last changed : 11/29/2023 11:08:45 AM by SYSTEM  
 (modified after loading)  
 Sample Info : IB, Hexane/i-PrOH = 95/5, 0.8 mL/min, 30 oC, 230 nm

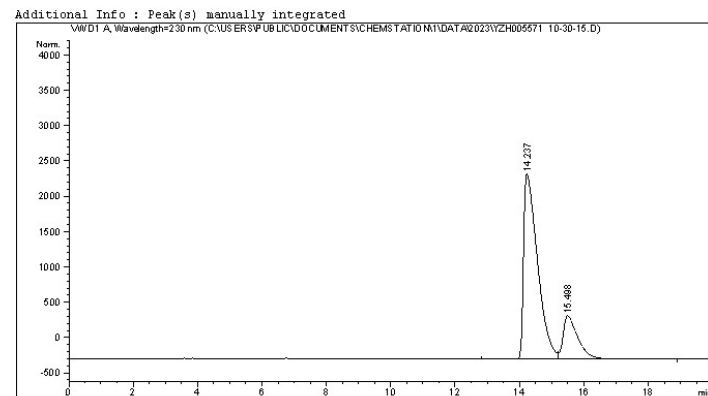

=====  
 Area Percent Report  
 =====

Sorted By : Signal  
 Multiplier : 1.0000  
 Dilution : 1.0000  
 Sample Amount : 1.00000 [ng/ul] (not used in calc.)  
 Do not use Multiplier & Dilution Factor with ISTDs

Signal 1: VWD1 A, Wavelength=230 nm

| Peak # | RetTime [min] | Type | Width [min] | Area [mAU*s] | Height [mAU] | Area %  |
|--------|---------------|------|-------------|--------------|--------------|---------|
| 1      | 14.237        | VV R | 0.4570      | 6.01549e4    | 2007.48206   | 79.6717 |
| 2      | 15.498        | VV R | 0.4721      | 1.53486e4    | 472.10394    | 20.3283 |

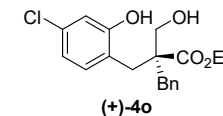

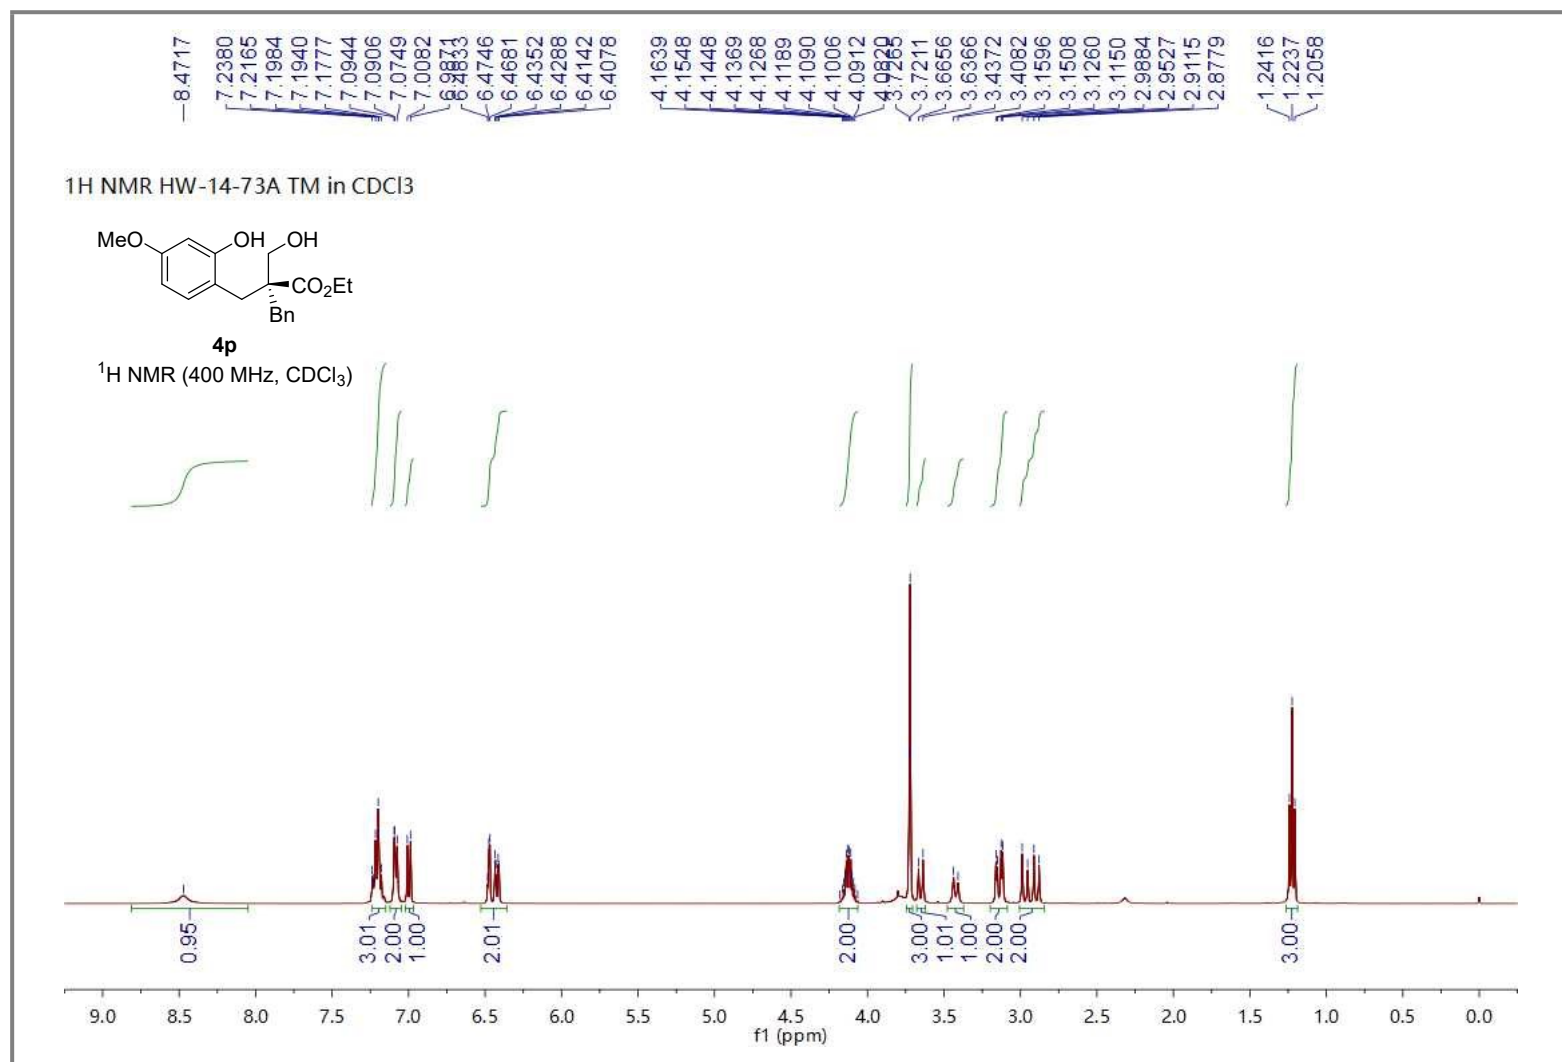

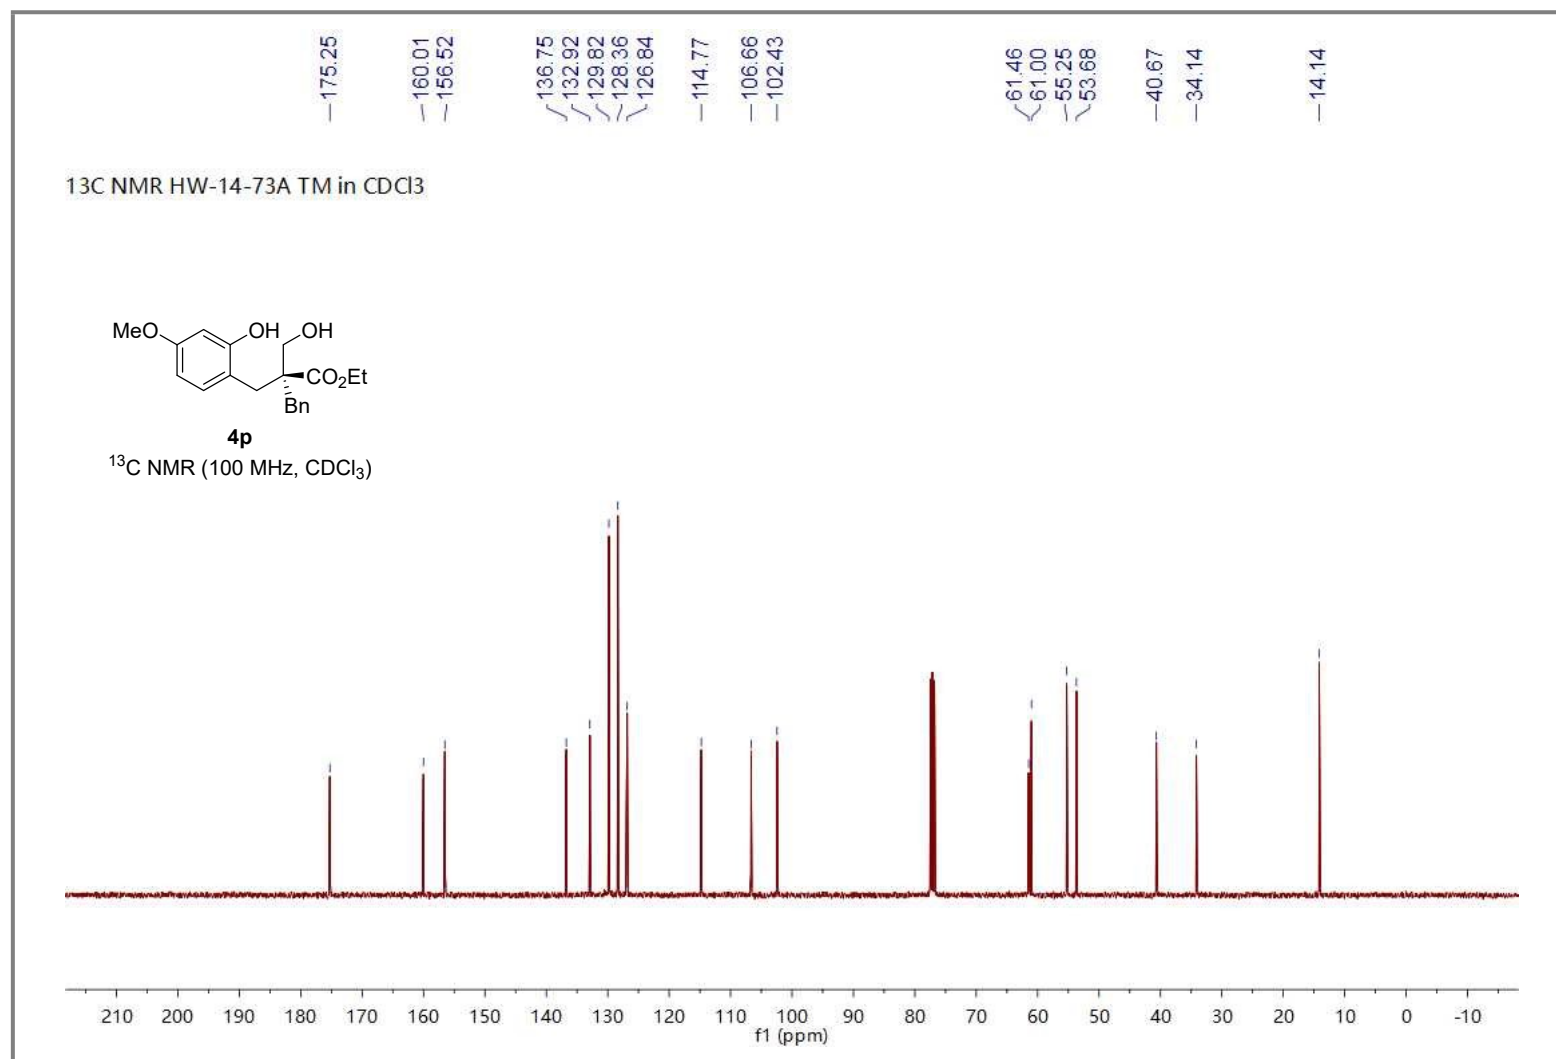



Data File C:\USERS\PUBLIC\DOCUMENTS\CHEMSTATION\1\DATA\2023\YZH004298 11-18-47.D  
 Sample Name: HW-14-73A TM+/-

=====  
 Acq. Operator : SYSTEM  
 Sample Operator : SYSTEM  
 Acq. Instrument : HPLC1260 II Location : 1  
 Injection Date : 5/31/2023 11:18:47 AM Inj : 1  
 Inj Volume : No inj  
 Acq. Method : C:\USERS\PUBLIC\DOCUMENTS\CHEMSTATION\1\METHODS\def\_LC1.M  
 Last changed : 5/31/2023 11:04:21 AM by SYSTEM  
 (modified after loading)  
 Analysis Method : C:\USERS\PUBLIC\DOCUMENTS\CHEMSTATION\1\METHODS\def\_LC1.M  
 Last changed : 10/16/2023 10:16:44 PM by SYSTEM  
 (modified after loading)  
 Sample Info : IC, Hexane/i-PrOH = 80/20, 0.8 mL/min, 30 oC, 230 nm

Additional Info : Peak(s) manually integrated

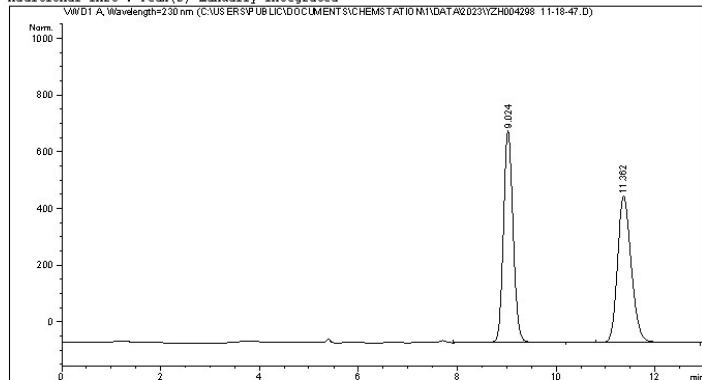

=====  
 Area Percent Report  
 =====

Sorted By : Signal  
 Multiplier : 1.0000  
 Dilution : 1.0000  
 Sample Amount : 1.00000 [ng/ul] (not used in calc.)  
 Do not use Multiplier & Dilution Factor with ISTDs

Signal 1: VWD1 A, Wavelength=230 nm

| Peak # | RetTime [min] | Type | Width [min] | Area [mAU*s] | Height [mAU] | Area %  |
|--------|---------------|------|-------------|--------------|--------------|---------|
| 1      | 9.024         | VV R | 0.2111      | 8211.14258   | 602.08978    | 50.5086 |
| 2      | 11.362        | BB   | 0.2986      | 8045.78271   | 416.01419    | 49.4914 |

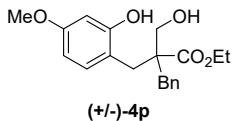

Data File C:\USERS\PUBLIC\DOCUMENTS\CHEMSTATION\1\DATA\2023\YZH004299 11-33-55.D  
 Sample Name: HW-14-73A TM

=====  
 Acq. Operator : SYSTEM  
 Sample Operator : SYSTEM  
 Acq. Instrument : HPLC1260 II Location : 1  
 Injection Date : 5/31/2023 11:33:56 AM Inj : 1  
 Inj Volume : No inj  
 Acq. Method : C:\USERS\PUBLIC\DOCUMENTS\CHEMSTATION\1\METHODS\def\_LC1.M  
 Last changed : 5/31/2023 11:04:21 AM by SYSTEM  
 (modified after loading)  
 Analysis Method : C:\USERS\PUBLIC\DOCUMENTS\CHEMSTATION\1\METHODS\def\_LC1.M  
 Last changed : 10/16/2023 10:18:10 PM by SYSTEM  
 (modified after loading)  
 Sample Info : IC, Hexane/i-PrOH = 80/20, 0.8 mL/min, 30 oC, 230 nm

Additional Info : Peak(s) manually integrated

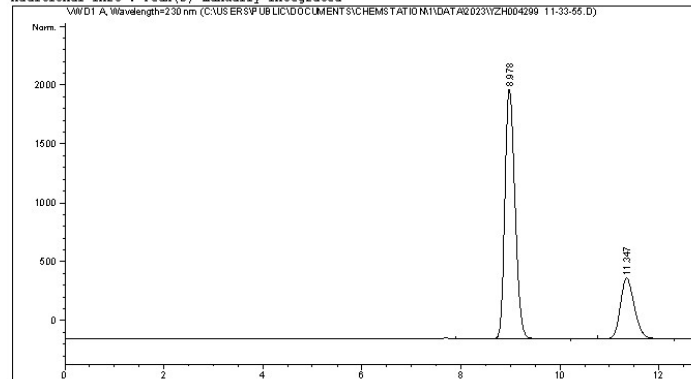

=====  
 Area Percent Report  
 =====

Sorted By : Signal  
 Multiplier : 1.0000  
 Dilution : 1.0000  
 Sample Amount : 1.00000 [ng/ul] (not used in calc.)  
 Do not use Multiplier & Dilution Factor with ISTDs

Signal 1: VWD1 A, Wavelength=230 nm

| Peak # | RetTime [min] | Type | Width [min] | Area [mAU*s] | Height [mAU] | Area %  |
|--------|---------------|------|-------------|--------------|--------------|---------|
| 1      | 8.978         | VB R | 0.2214      | 2.56802e4    | 1806.03650   | 74.7429 |
| 2      | 11.347        | BB   | 0.3036      | 8677.82031   | 440.92514    | 25.2571 |

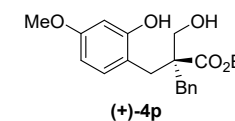

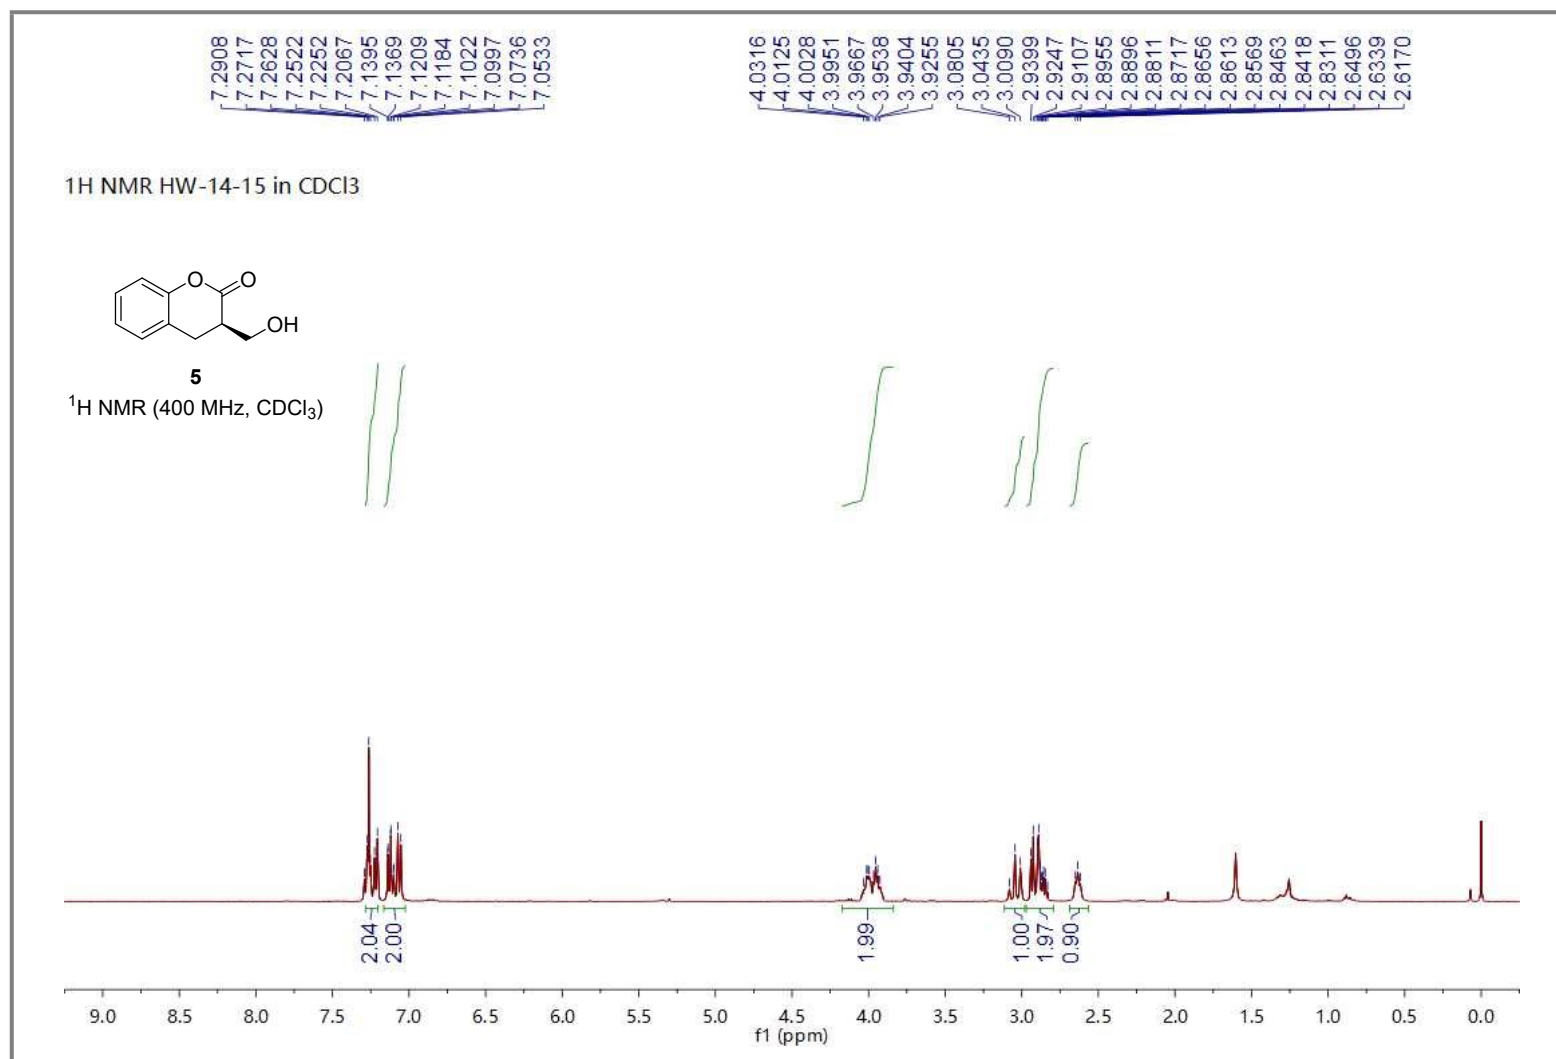

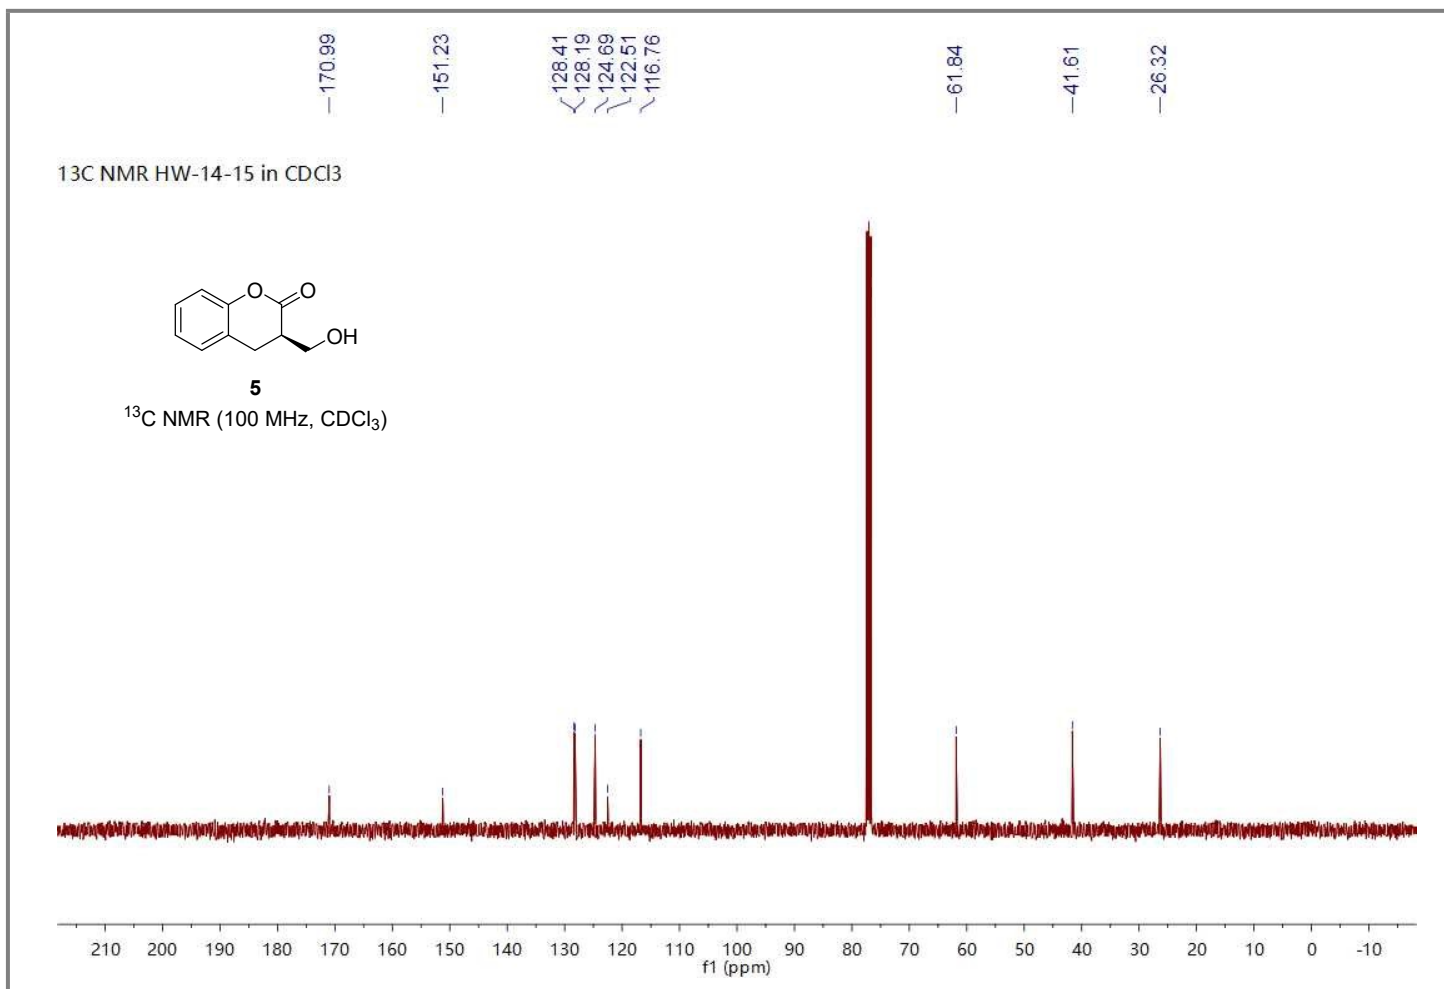

Data File C:\CHEM32\1\DATA\ZHOU-23\YZN024770.D  
 Sample Name: HW-16-24+/-

=====  
 Acq. Operator :  
 Acq. Instrument : Instrument 1 Location : -  
 Injection Date : 12/9/2023 2:58:54 AM  
 Acq. Method : C:\CHEM32\1\METHODS\DEF\_LC.M  
 Last changed : 12/9/2023 2:41:50 AM  
 (modified after loading)  
 Analysis Method : C:\CHEM32\1\METHODS\DEF\_LC.M  
 Last changed : 12/23/2023 3:47:04 AM  
 (modified after loading)  
 Sample Info : AS-H, Hexane/iPrOH = 90/10, 0.8 mL/min, 30 oC, 230 nm

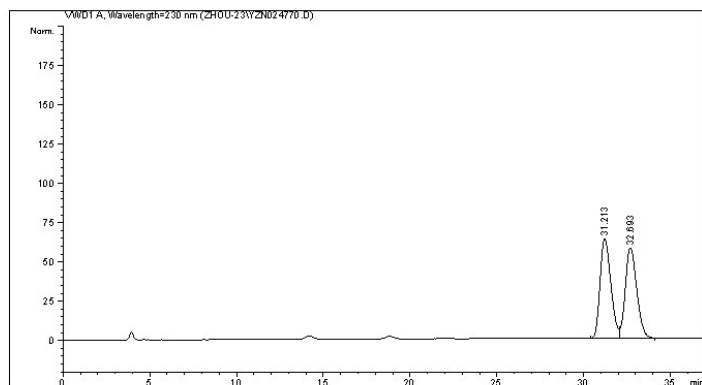

=====  
 Area Percent Report  
 =====

Sorted By : Signal  
 Multiplier: : 1.0000  
 Dilution: : 1.0000  
 Use Multiplier & Dilution Factor with ISTDs

Signal 1: VWD1 A, Wavelength=230 nm

| Peak # | RetTime [min] | Type | Width [min] | Area [mAU] | Height [%] | Area [%] |
|--------|---------------|------|-------------|------------|------------|----------|
| 1      | 31.213        | BV   | 0.6762      | 2733.57471 | 63.41490   | 50.8524  |
| 2      | 32.693        | VB   | 0.7076      | 2641.93481 | 57.67999   | 49.1476  |

Totals : 5375.50952 121.09489

=====  
 \*\*\* End of Report \*\*\*

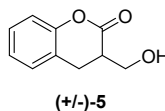

Data File C:\CHEM32\1\DATA\ZHOU-23\YZN024771.D  
 Sample Name: HW-16-24

=====  
 Acq. Operator :  
 Acq. Instrument : Instrument 1 Location : -  
 Injection Date : 12/9/2023 3:41:38 AM  
 Acq. Method : C:\CHEM32\1\METHODS\DEF\_LC.M  
 Last changed : 12/9/2023 3:41:03 AM  
 (modified after loading)  
 Analysis Method : C:\CHEM32\1\METHODS\DEF\_LC.M  
 Last changed : 12/23/2023 3:47:04 AM  
 (modified after loading)  
 Sample Info : AS-H, Hexane/iPrOH = 90/10, 0.8 mL/min, 30 oC, 230 nm

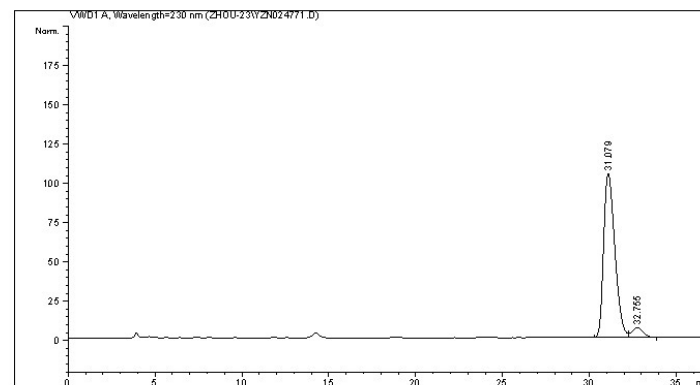

=====  
 Area Percent Report  
 =====

Sorted By : Signal  
 Multiplier: : 1.0000  
 Dilution: : 1.0000  
 Use Multiplier & Dilution Factor with ISTDs

Signal 1: VWD1 A, Wavelength=230 nm

| Peak # | RetTime [min] | Type | Width [min] | Area [mAU] | Height [%] | Area [%] |
|--------|---------------|------|-------------|------------|------------|----------|
| 1      | 31.079        | BV   | 0.6996      | 4687.87695 | 104.49860  | 94.3382  |
| 2      | 32.766        | VB   | 0.6432      | 281.34866  | 6.35522    | 5.6618   |

Totals : 4969.22562 110.85381

=====  
 \*\*\* End of Report \*\*\*

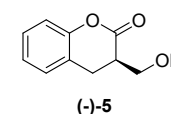

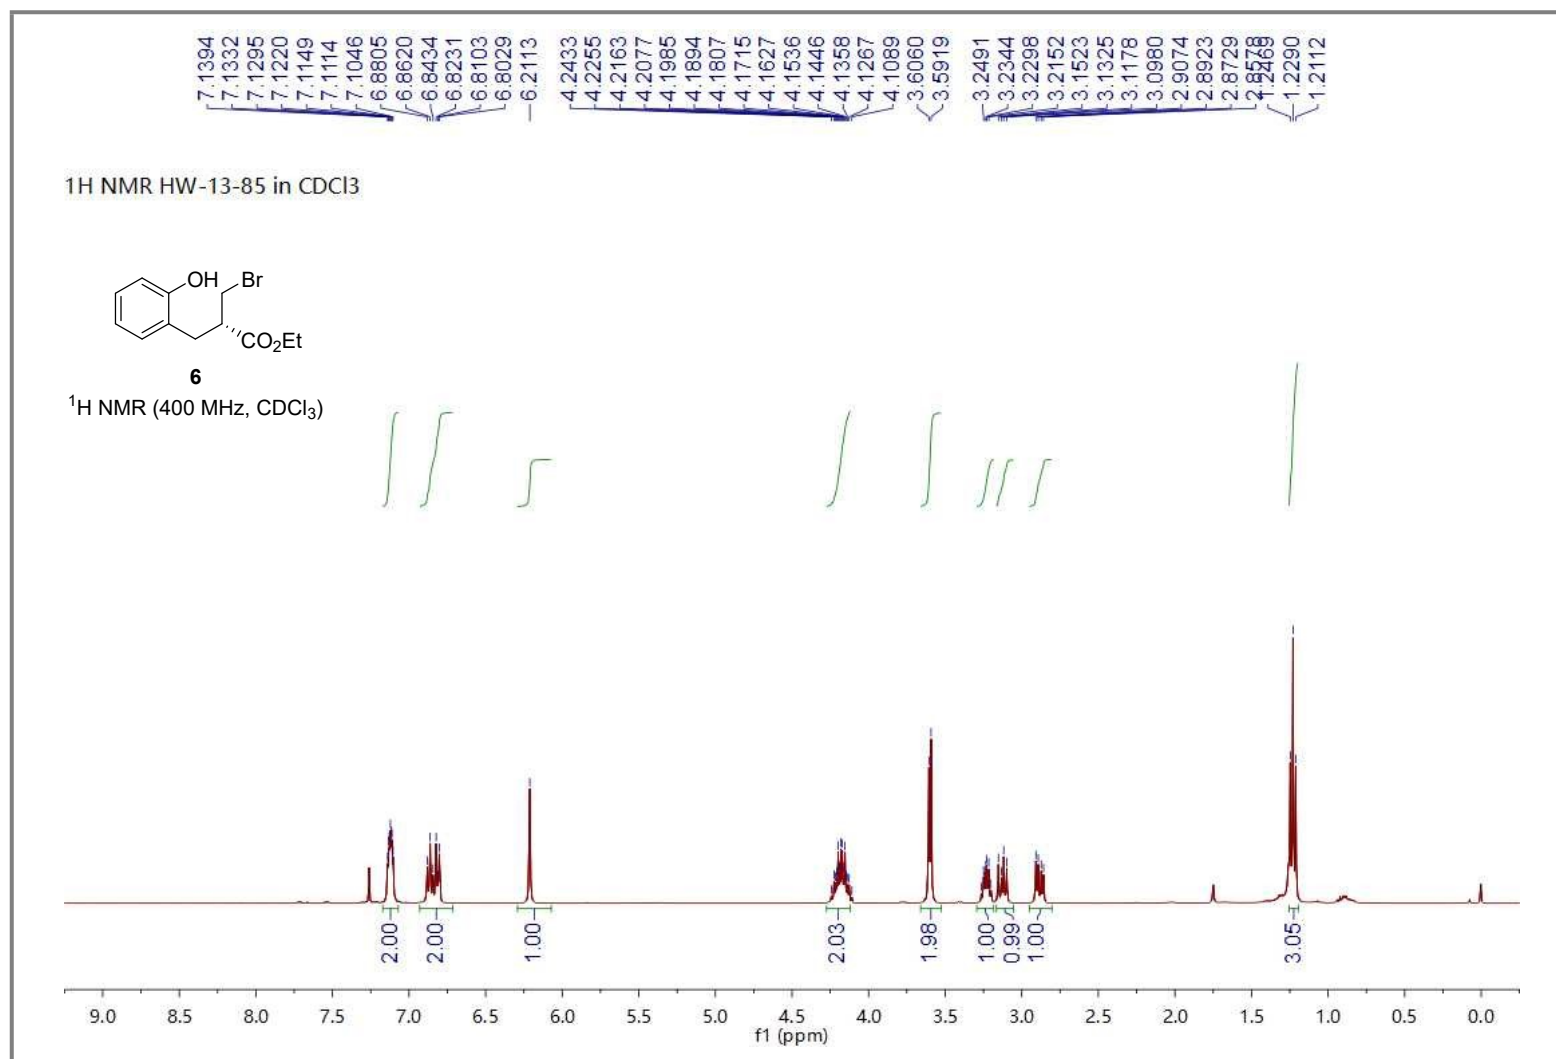

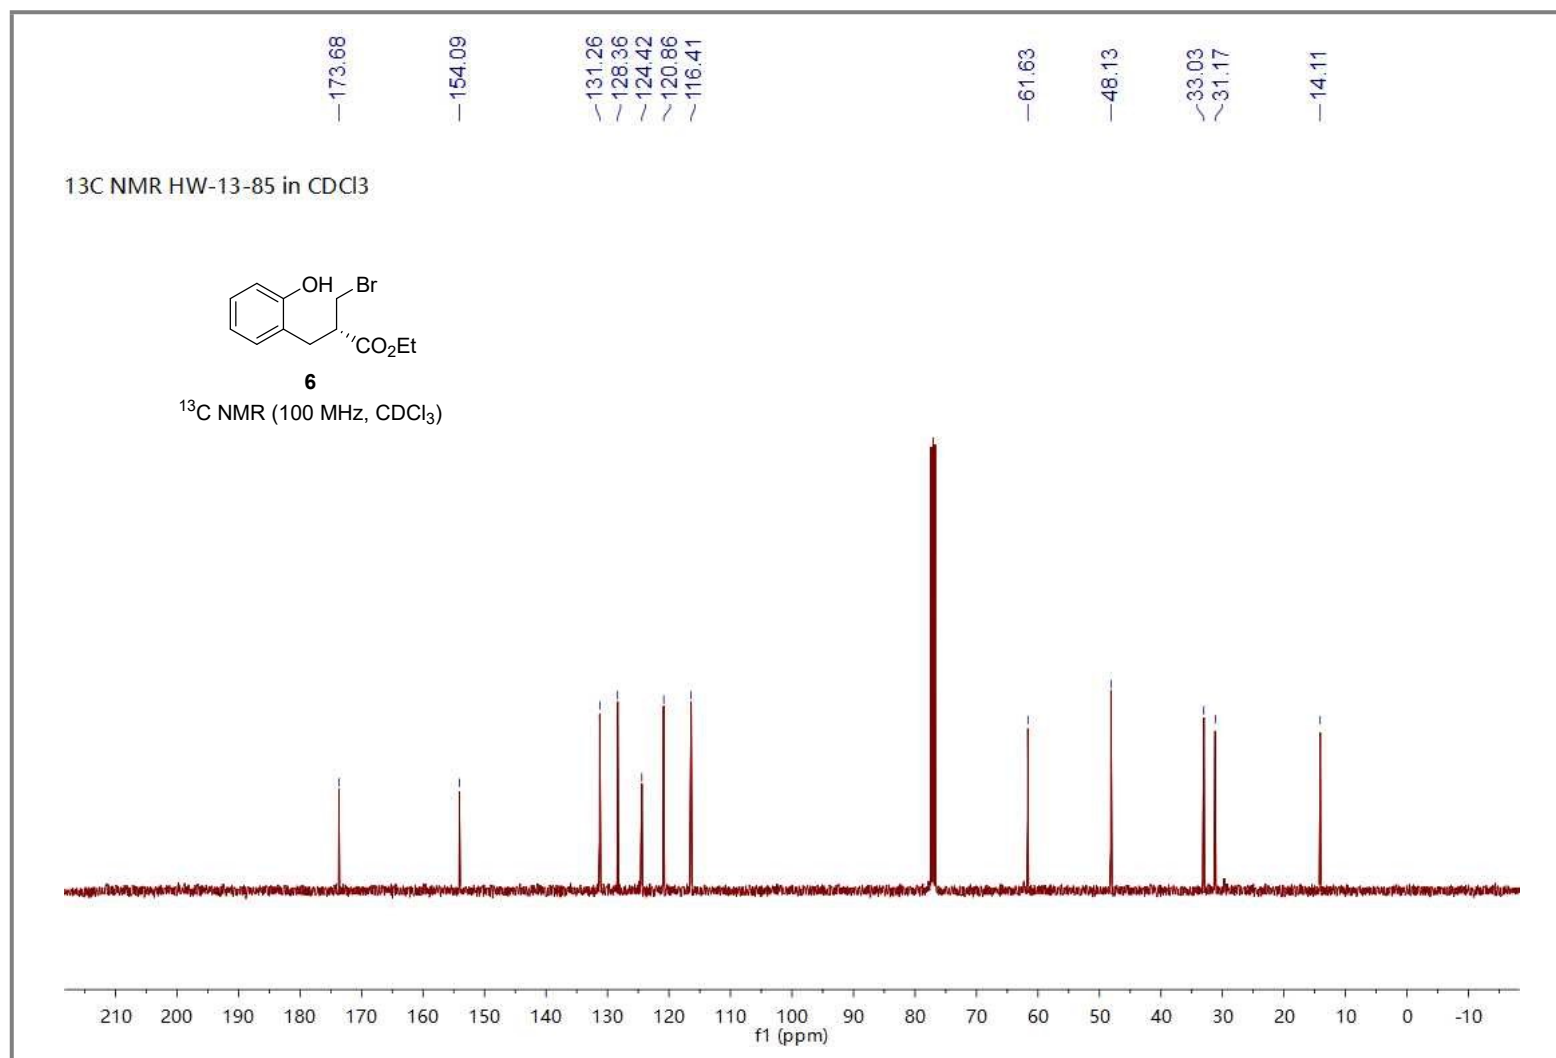

Data File C:\CHEM32\1\DATA\ZHOU-22\YZN022619.D  
Sample Name: HW-13-90+/-

=====  
Acq. Operator :  
Acq. Instrument : Instrument 1 Location : -  
Injection Date : 3/13/2023 8:44:04 PM  
Acq. Method : C:\CHEM32\1\METHODS\DEF\_LC.M  
Last changed : 3/13/2023 8:28:37 PM  
(modified after loading)  
Analysis Method : C:\CHEM32\1\METHODS\DEF\_LC.M  
Last changed : 12/23/2023 3:38:34 AM  
(modified after loading)  
Sample Info : OD-H, Hexane/i-PrOH = 75/25, 0.8 mL/min, 30 oC, 230nm

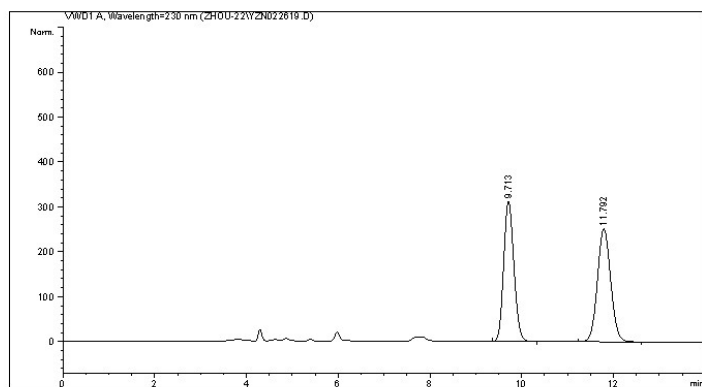

=====  
Area Percent Report  
=====

Sorted By : Signal  
Multiplier: : 1.0000  
Dilution: : 1.0000  
Use Multiplier & Dilution Factor with ISTDs

Signal 1: VWD1 A, Wavelength=230 nm

| Peak # | RetTime [min] | Type | Width [min] | Area [mAU] | Height [mAU] | Area %  |
|--------|---------------|------|-------------|------------|--------------|---------|
| 1      | 9.713         | VB   | 0.2424      | 4844.71729 | 311.80060    | 48.9922 |
| 2      | 11.792        | BB   | 0.3125      | 5044.02588 | 251.65918    | 51.0078 |

Totals : 9888.74316 563.45978

=====  
\*\*\* End of Report \*\*\*

Instrument 1 12/23/2023 3:38:38 AM

Page 1 of 1

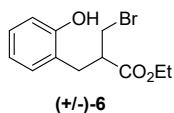

Data File C:\CHEM32\1\DATA\ZHOU-22\YZN022621.D  
Sample Name: HW-13-96

=====  
Acq. Operator :  
Acq. Instrument : Instrument 1 Location : -  
Injection Date : 3/13/2023 9:20:49 PM  
Acq. Method : C:\CHEM32\1\METHODS\DEF\_LC.M  
Last changed : 3/13/2023 9:20:02 PM  
(modified after loading)  
Analysis Method : C:\CHEM32\1\METHODS\DEF\_LC.M  
Last changed : 12/23/2023 3:38:34 AM  
(modified after loading)  
Sample Info : OD-H, Hexane/i-PrOH = 75/25, 0.8 mL/min, 30 oC, 230nm

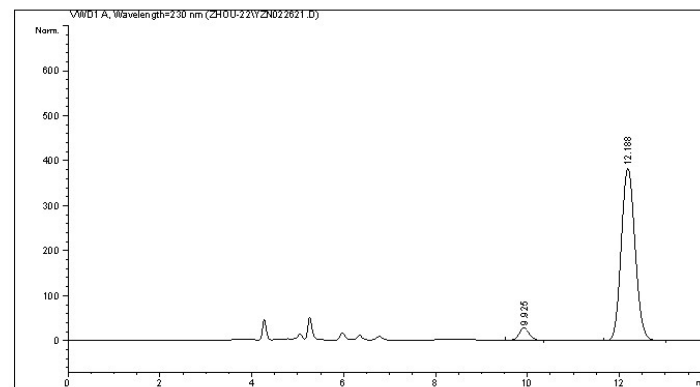

=====  
Area Percent Report  
=====

Sorted By : Signal  
Multiplier: : 1.0000  
Dilution: : 1.0000  
Use Multiplier & Dilution Factor with ISTDs

Signal 1: VWD1 A, Wavelength=230 nm

| Peak # | RetTime [min] | Type | Width [min] | Area [mAU] | Height [mAU] | Area %  |
|--------|---------------|------|-------------|------------|--------------|---------|
| 1      | 9.925         | VB   | 0.2418      | 426.03473  | 27.28893     | 5.0749  |
| 2      | 12.188        | BB   | 0.3261      | 7968.93896 | 382.44785    | 94.9251 |

Totals : 8394.97369 409.73677

=====  
\*\*\* End of Report \*\*\*

Instrument 1 12/23/2023 3:39:19 AM

Page 1 of 1

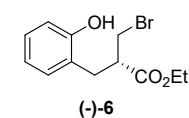

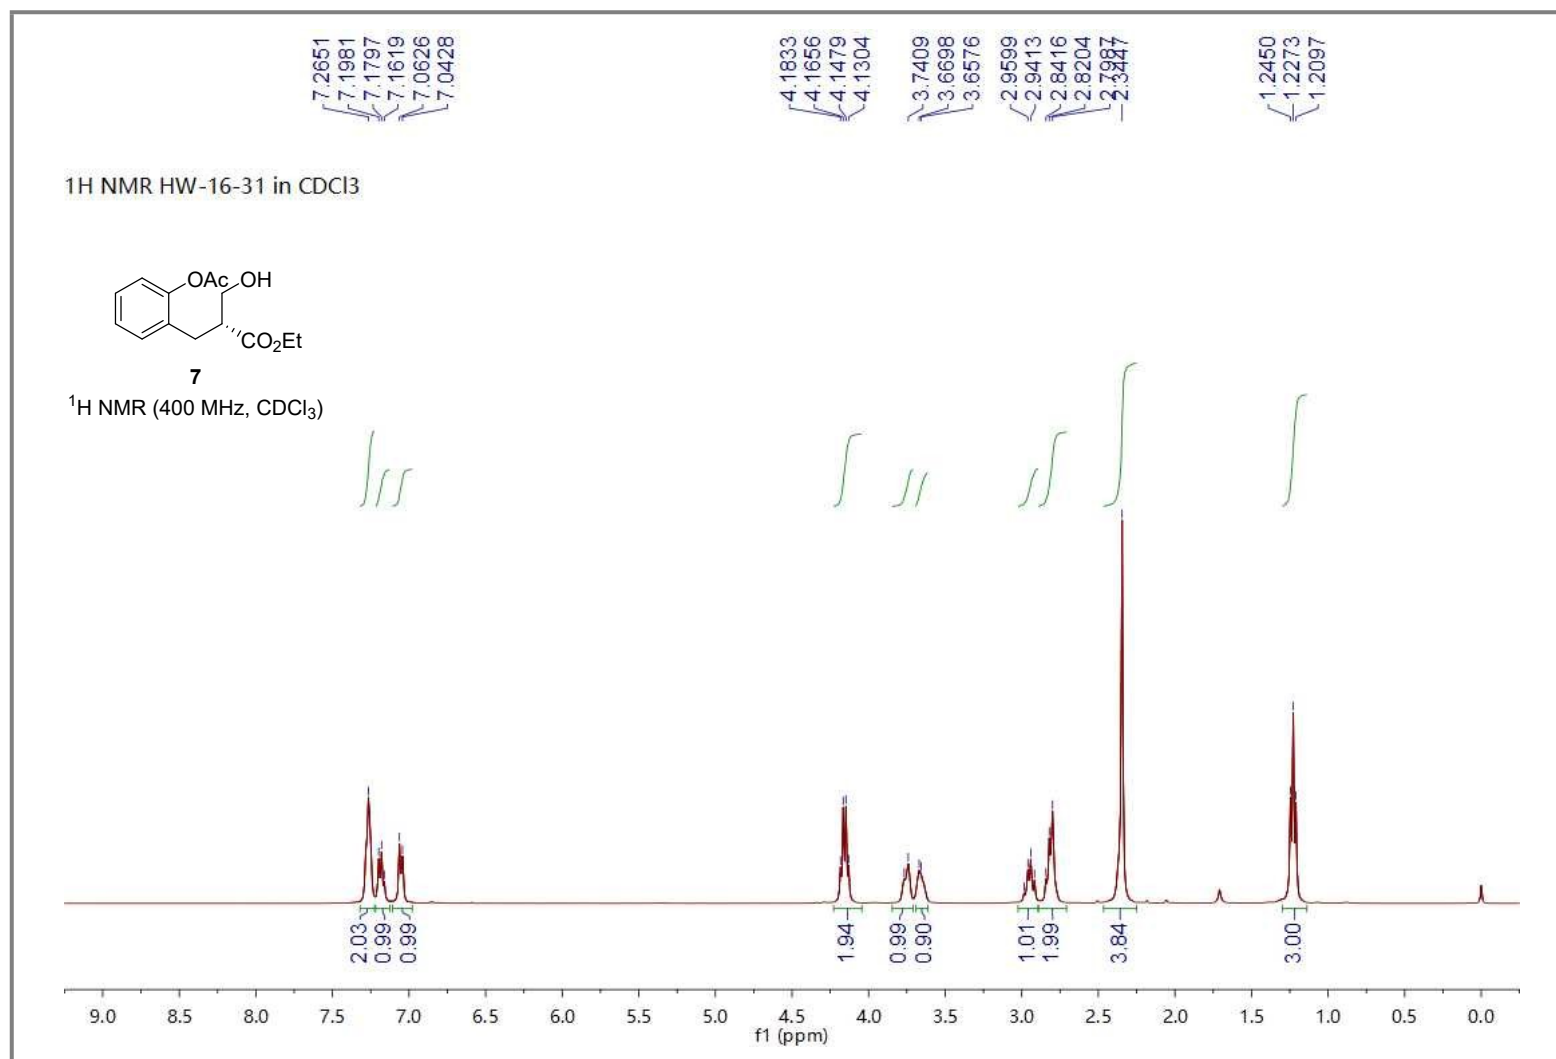



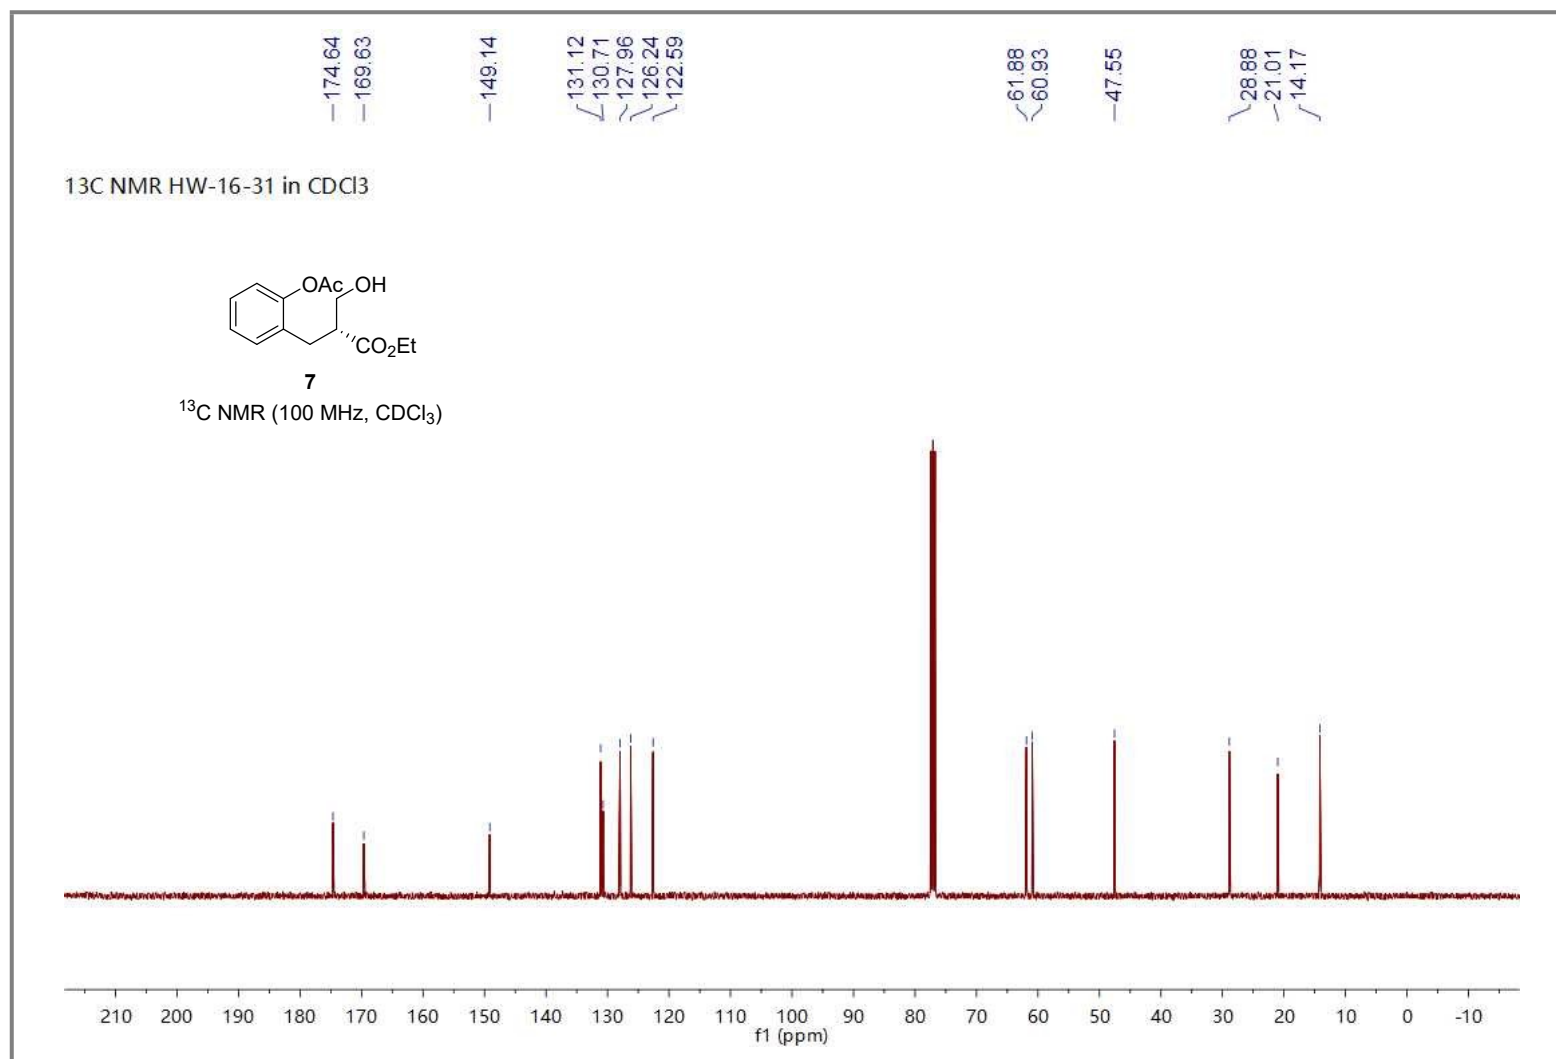

Data File C:\USERS\PUBLIC\DOCUMENTS\CHEMSTATION\1\DATA\2023\YZH005771 19-04-11.D  
 Sample Name: HW-16-31+/-

=====  
 Acq. Operator : SYSTEM  
 Sample Operator : SYSTEM  
 Acq. Instrument : HPLC1260 II Location : 1  
 Injection Date : 12/15/2023 7:04:11 PM Inj : 1  
 Inj Volume : No inj  
 Acq. Method : C:\USERS\PUBLIC\DOCUMENTS\CHEMSTATION\1\METHODS\def\_LC1.M  
 Last changed : 12/15/2023 7:01:30 PM by SYSTEM  
 (modified after loading)  
 Analysis Method : C:\USERS\PUBLIC\DOCUMENTS\CHEMSTATION\1\METHODS\def\_LC1.M  
 Last changed : 12/22/2023 3:55:20 PM by SYSTEM  
 (modified after loading)  
 Sample Info : OJ-H, Hexane/1-PrOH = 70/30, 0.8 mL/min, 30 oC, 230 nm

Additional Info : Peak(s) manually integrated

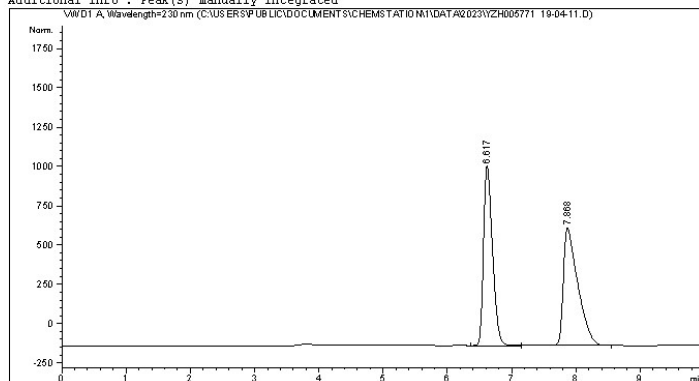

=====  
 Area Percent Report  
 =====

Sorted By : Signal  
 Multiplier : 1.0000  
 Dilution : 1.0000  
 Sample Amount : 1.00000 [ng/ul] (not used in calc.)  
 Do not use Multiplier & Dilution Factor with ISTDs

Signal 1: VWD1 A, Wavelength=230 nm

| Peak # | RetTime [min] | Type | Width [min] | Area [mAU*s] | Height [mAU] | Area %  |
|--------|---------------|------|-------------|--------------|--------------|---------|
| 1      | 6.617         | BB   | 0.1490      | 8325.12598   | 859.45637    | 48.6079 |
| 2      | 7.868         | VB R | 0.2215      | 8801.97461   | 565.45422    | 51.3921 |

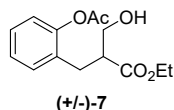

Data File C:\USERS\PUBLIC\DOCUMENTS\CHEMSTATION\1\DATA\2023\YZH005774 09-34-58.D  
 Sample Name: HW-16-31

=====  
 Acq. Operator : SYSTEM  
 Sample Operator : SYSTEM  
 Acq. Instrument : HPLC1260 II Location : 1  
 Injection Date : 12/16/2023 9:34:58 AM Inj : 1  
 Inj Volume : No inj  
 Acq. Method : C:\USERS\PUBLIC\DOCUMENTS\CHEMSTATION\1\METHODS\def\_LC1.M  
 Last changed : 12/16/2023 9:18:01 AM by SYSTEM  
 (modified after loading)  
 Analysis Method : C:\USERS\PUBLIC\DOCUMENTS\CHEMSTATION\1\METHODS\def\_LC1.M  
 Last changed : 12/22/2023 3:55:20 PM by SYSTEM  
 (modified after loading)  
 Sample Info : OJ-H, Hexane/1-PrOH = 70/30, 0.8 mL/min, 30 oC, 230 nm

Additional Info : Peak(s) manually integrated

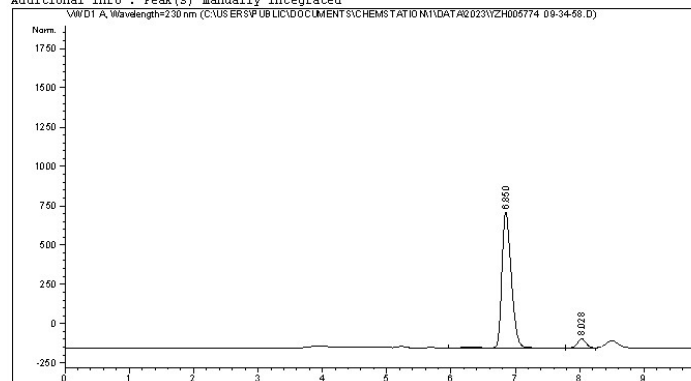

=====  
 Area Percent Report  
 =====

Sorted By : Signal  
 Multiplier : 1.0000  
 Dilution : 1.0000  
 Sample Amount : 1.00000 [ng/ul] (not used in calc.)  
 Do not use Multiplier & Dilution Factor with ISTDs

Signal 1: VWD1 A, Wavelength=230 nm

| Peak # | RetTime [min] | Type | Width [min] | Area [mAU*s] | Height [mAU] | Area %  |
|--------|---------------|------|-------------|--------------|--------------|---------|
| 1      | 6.850         | VB R | 0.1558      | 5621.48438   | 553.58759    | 94.0795 |
| 2      | 8.028         | BV   | 0.1451      | 353.76694    | 37.84434     | 5.9205  |

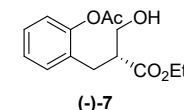

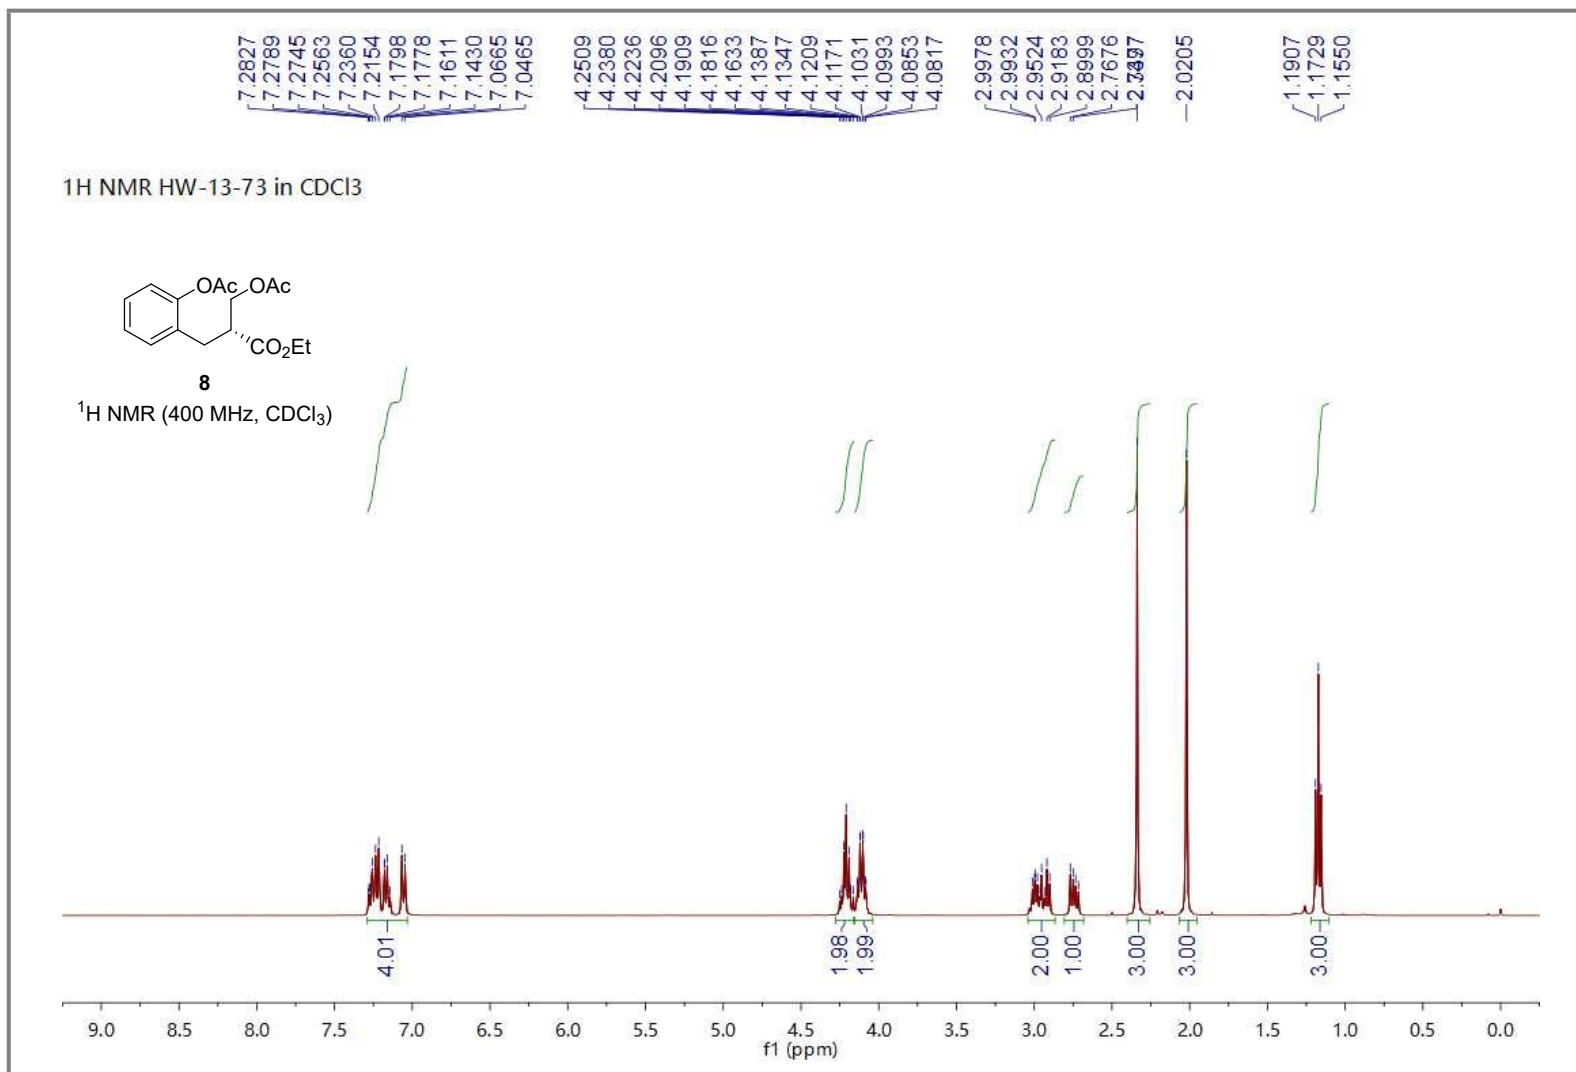

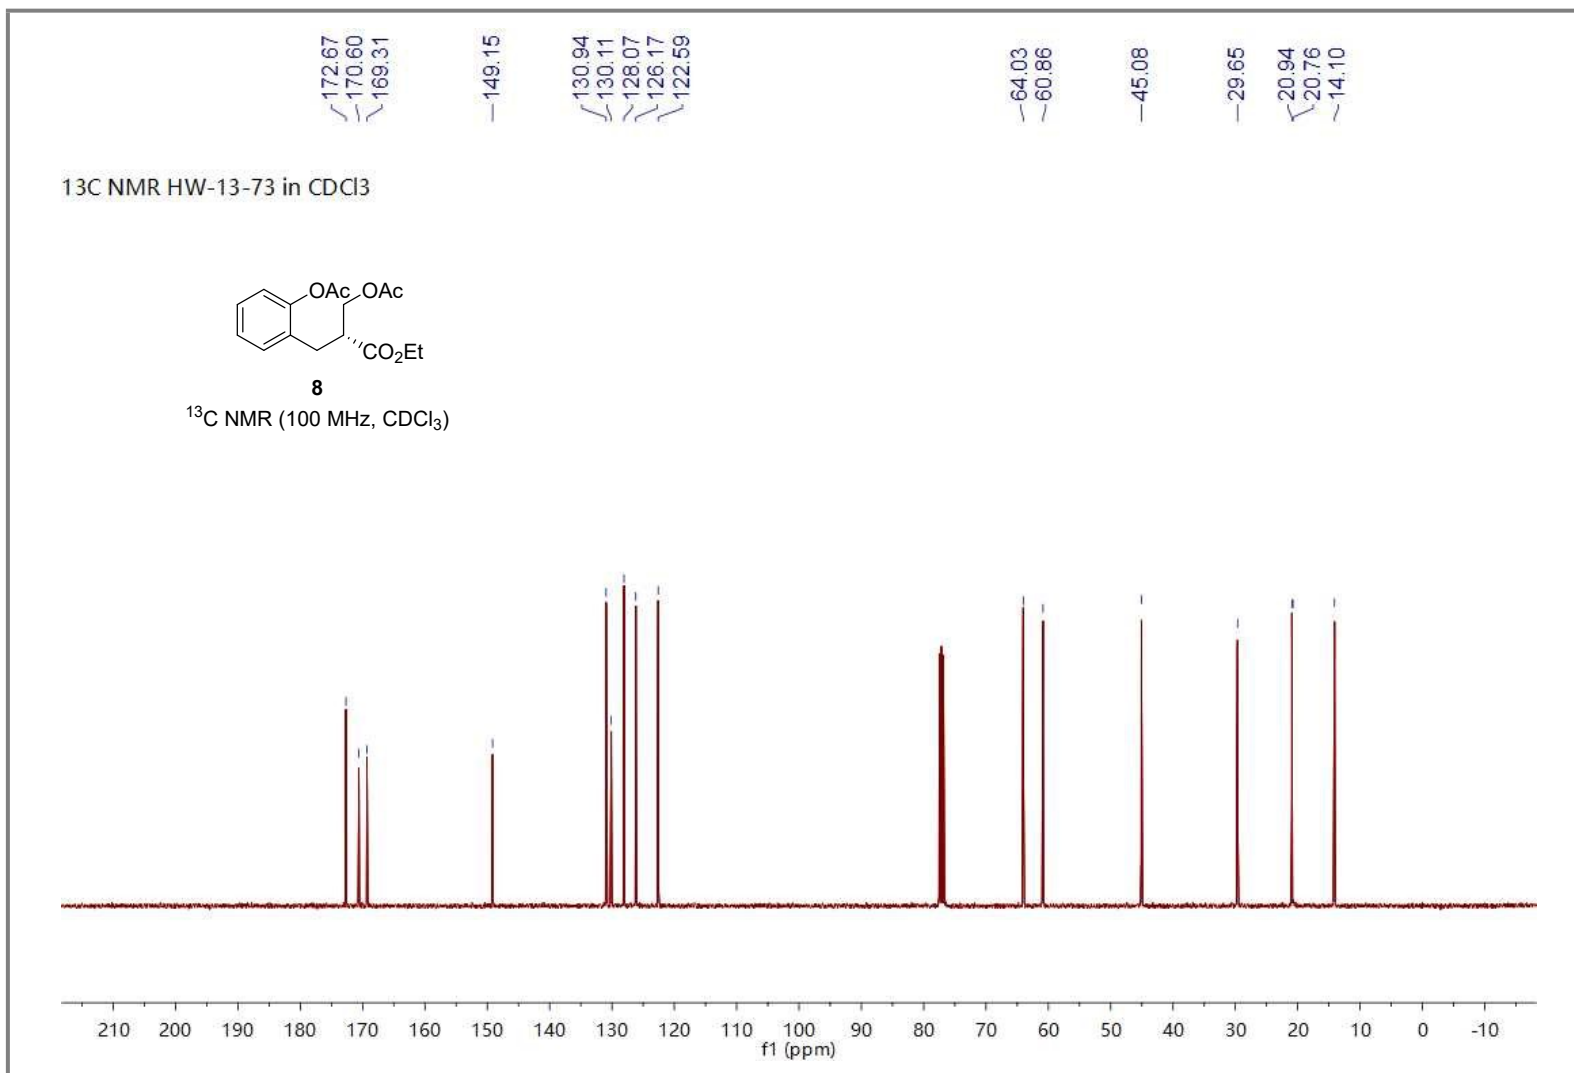

Data File C:\CHEM32\1\DATA\ZHOU-22\YZN022476.D  
 Sample Name: HW-13-73+/-

=====  
 Acq. Operator :  
 Acq. Instrument : Instrument 1 Location : -  
 Injection Date : 2/23/2023 3:08:54 AM  
 Acq. Method : C:\CHEM32\1\METHODS\DEF\_LC.M  
 Last changed : 2/23/2023 2:29:51 AM  
 (modified after loading)  
 Analysis Method : C:\CHEM32\1\METHODS\DEF\_LC.M  
 Last changed : 12/23/2023 3:34:58 AM  
 (modified after loading)  
 Sample Info : OD-H, Hexane/i-PrOH = 95/5, 0.8 mL/min, 30 oC, 254 nm

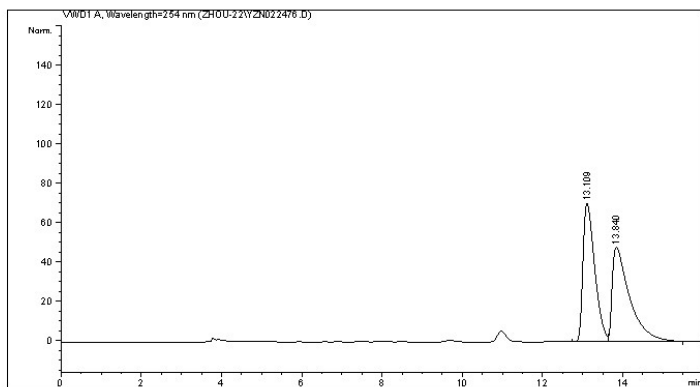

=====  
 Area Percent Report  
 =====

Sorted By : Signal  
 Multiplier: : 1.0000  
 Dilution: : 1.0000  
 Use Multiplier & Dilution Factor with ISTDs

Signal 1: VWD1 A, Wavelength=254 nm

| Peak # | RetTime [min] | Type | Width [min] | Area mAU   | Height [mAU] | Area %  |
|--------|---------------|------|-------------|------------|--------------|---------|
| 1      | 13.109        | VV   | 0.3114      | 1430.85986 | 70.39180     | 49.5265 |
| 2      | 13.840        | VB   | 0.4342      | 1458.21667 | 48.03914     | 50.4735 |

Totals : 2889.07654 118.43094

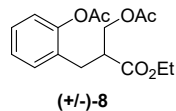

=====  
 \*\*\* End of Report \*\*\*

Data File C:\CHEM32\1\DATA\ZHOU-22\YZN022477.D  
 Sample Name: HW-13-73

=====  
 Acq. Operator :  
 Acq. Instrument : Instrument 1 Location : -  
 Injection Date : 2/23/2023 3:27:49 AM  
 Acq. Method : C:\CHEM32\1\METHODS\DEF\_LC.M  
 Last changed : 2/23/2023 3:26:32 AM  
 (modified after loading)  
 Analysis Method : C:\CHEM32\1\METHODS\DEF\_LC.M  
 Last changed : 12/23/2023 3:37:20 AM  
 (modified after loading)  
 Sample Info : OD-H, Hexane/i-PrOH = 95/5, 0.8 mL/min, 30 oC, 254 nm

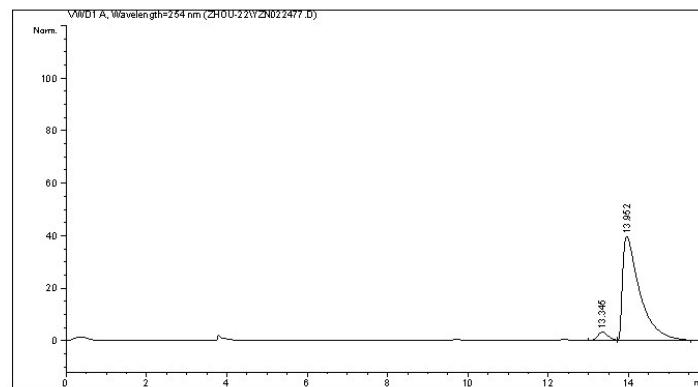

=====  
 Area Percent Report  
 =====

Sorted By : Signal  
 Multiplier: : 1.0000  
 Dilution: : 1.0000  
 Use Multiplier & Dilution Factor with ISTDs

Signal 1: VWD1 A, Wavelength=254 nm

| Peak # | RetTime [min] | Type | Width [min] | Area mAU   | Height [mAU] | Area %  |
|--------|---------------|------|-------------|------------|--------------|---------|
| 1      | 13.345        | BV   | 0.2852      | 59.21564   | 3.20821      | 4.7798  |
| 2      | 13.952        | VB   | 0.4298      | 1179.64685 | 39.68708     | 95.2202 |

Totals : 1238.86249 42.89529

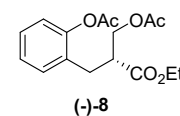

=====  
 \*\*\* End of Report \*\*\*
